# Supplementary material for: An Integrated Cell Purification and Genomics Strategy Reveals Multiple Regulators of Pancreas Development
Source: PLOS journal article supplement (doi:10.1371/journal.pgen.1004645), 2014-10-16

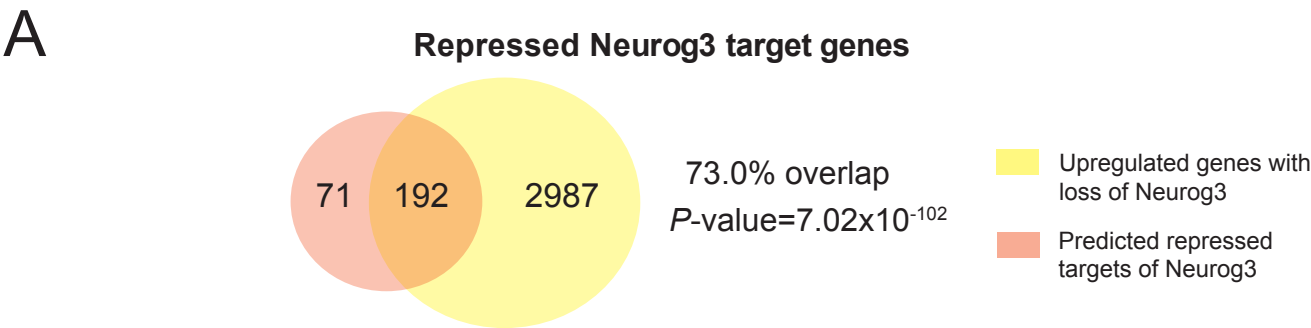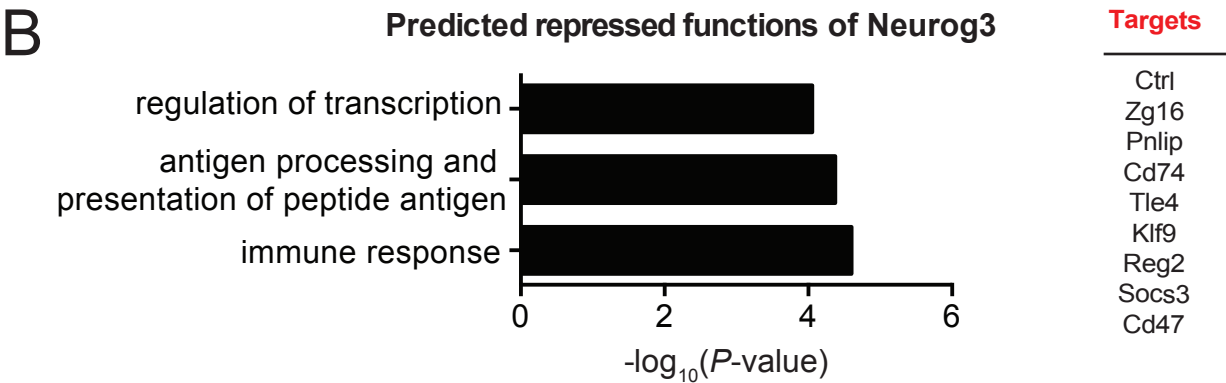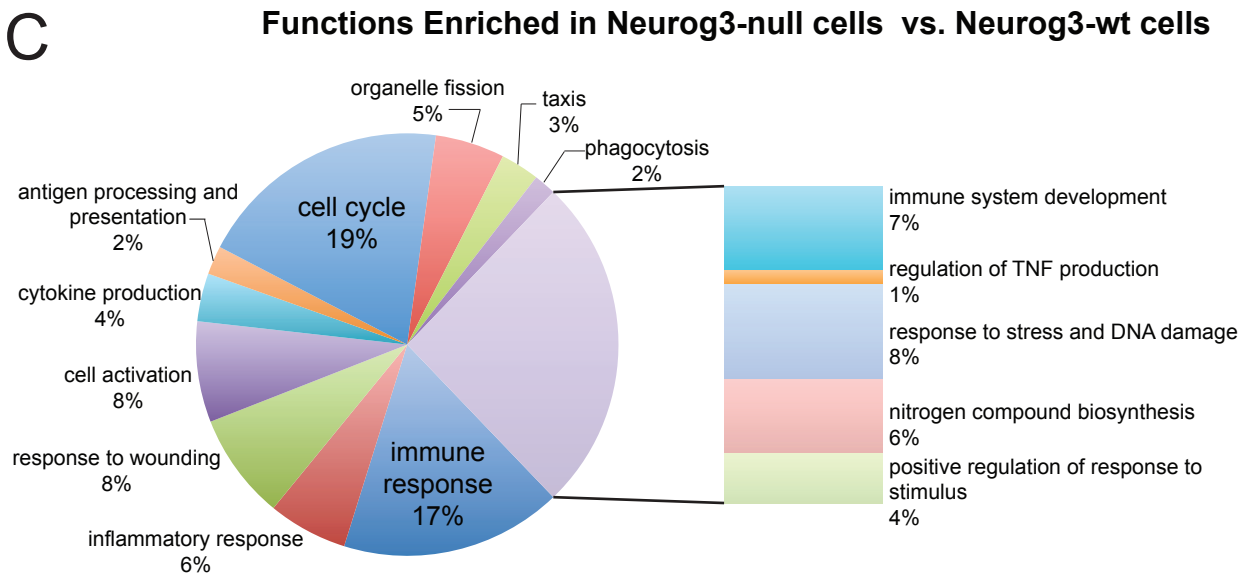

Supplement: S6 (10.1371/journal.pgen.1004645.s006) [file journal.pgen.1004645.s006]
