# Supplementary material for: An Integrated Cell Purification and Genomics Strategy Reveals Multiple Regulators of Pancreas Development
Source: PLoS Genet. 2014 Oct 16;10(10):e1004645. doi: 10.1371/journal.pgen.1004645 (PMC4199491; doi:10.1371/journal.pgen.1004645)
Supplement: Table S2 — Gene signatures of pancreatic cells types. Tab1: Positive signature. Tab2: Negative signature. Fetal beta cells (E15, E17 and P1 beta cells). Postnatal beta cells (P15 and 8–12 week beta cells). Parameters used to obtain gene signatures are described in methods. Corresponding Figure S3A–B. (XLS) [file pgen.1004645.s010.xls]

## Sheet: Gene Signatures (enriched)
Cell Type	AffyID	Gene Symbol	E11 SPP-1.CEL	E11 SPP-2.CEL	E11 SPP-3.CEL	E11 SPP-4.CEL	E15 SPP-1.CEL	E15 SPP-2.CEL	E15 SPP-3.CEL	E15 Acinar-1.CEL	E15 Acinar-2.CEL	E15 Acinar-3.CEL	Adult Duct-1.CEL	Adult Duct-2.CEL	Adult Duct-3.CEL	Adult Duct-4.CEL	E15 EP-1.CEL	E15 EP-2.CEL	E15 EP-3.CEL	P1 Alpha-1.CEL	P1 Alpha-2.CEL	P1 Alpha-3.CEL	P1 Alpha-4.CEL	Adult Alpha-1.CEL	Adult Alpha-2.CEL	Adult Alpha-3.CEL	Adult Alpha-4.CEL	Adult Alpha-5.CEL	E15 Beta-1.CEL	E15 Beta-2.CEL	E15 Beta-3.CEL	E15 Beta-4.CEL	E17 Beta-1.CEL	E17 Beta-2.CEL	E17 Beta-3.CEL	P1 Beta-1.CEL	P1 Beta-2.CEL	P1 Beta-3.CEL	P15 Beta-1.CEL	P15 Beta-2.CEL	P15 Beta-3.CEL	P15 Beta-4.CEL	P15 Beta-5.CEL	P15 Beta-6.CEL	Adult Beta-1.CEL	Adult Beta-2.CEL	Adult Beta-3.CEL	Adult Beta-4.CEL
E11 Pancreatic Progenitor	1428911_at	Ttll4	10.946	11.0023	10.9723	10.9984	10.111	9.94923	10.3196	9.93401	10.2185	10.0662	9.58296	9.7112	9.79404	9.5745	9.44347	9.41275	9.36139	9.27192	9.40786	9.46588	9.43093	9.62629	9.72165	9.42037	9.41761	9.47828	9.06511	9.24425	9.25804	9.28114	9.26536	9.29023	9.63895	9.69661	9.42445	9.37873	8.42198	9.26536	9.0437	9.3659	9.41982	9.43329	9.4245	9.2058	9.04359	8.74739
E11 Pancreatic Progenitor	1436592_at	Zfp799	9.06672	9.14448	9.26492	9.15554	7.29328	6.49082	7.21578	5.56417	6.59204	6.60895	7.16438	6.21657	6.54197	5.57681	7.32096	7.50628	7.40506	6.82355	7.12475	7.23141	6.25787	7.40896	7.70301	7.3623	7.67615	6.87876	7.0163	7.48034	7.17419	7.25213	6.63559	6.67718	7.48003	7.32938	7.13287	7.52746	7.1813	6.16589	6.43138	5.50949	5.73831	5.83228	5.99378	6.0245	5.65914	5.65698
E11 Pancreatic Progenitor	1438277_at	E130308A19Rik	8.84801	8.7394	8.71624	8.69291	7.80846	7.60749	7.21797	6.77686	7.15007	7.25159	6.70722	6.81103	6.61117	6.28835	7.39267	7.31505	7.37226	6.21194	6.50712	6.18498	6.37304	5.48901	6.40487	6.94284	6.76122	6.62937	7.0685	7.58308	7.24352	7.46484	6.72625	6.79031	6.68173	5.94409	6.41157	6.48719	7.92602	6.6157	6.72171	6.75286	6.71448	6.94066	6.73544	6.47457	5.88691	6.72101
E11 Pancreatic Progenitor	1424979_at	Aph1a	9.78996	9.73503	9.78852	9.88706	8.1969	8.32994	7.77358	8.56877	8.98726	8.85619	7.95835	7.89573	8.05595	7.92149	7.78487	7.6357	7.75712	8.62983	8.03923	8.1946	8.35612	7.71305	6.84159	7.99035	7.93113	7.65939	7.82711	7.94188	8.12814	8.2811	8.03968	7.94311	7.80999	8.23789	8.22022	8.13541	8.71693	7.83728	8.42144	8.02566	8.54913	8.83359	8.10949	7.98225	8.17948	7.67675
E11 Pancreatic Progenitor	1424724_a_at	D16Ertd472e	8.94922	9.0052	8.95217	8.95006	7.50773	7.20191	7.36329	7.20662	7.87706	7.34458	8.3019	8.16135	8.08103	7.48316	8.11629	8.00677	8.29492	7.03399	7.59202	7.39932	6.76021	7.54407	7.32694	7.27249	7.07192	7.79969	6.98152	6.95556	7.03423	6.32606	7.61451	7.3637	6.98335	6.90517	7.40748	7.19908	7.82384	7.34925	6.64855	6.62431	6.50536	6.50504	6.51525	6.95199	6.3286	6.16071
E11 Pancreatic Progenitor	1456795_at	Bend4	8.96069	8.95554	9.03876	8.9135	8.32392	8.32428	8.52829	7.60009	7.15379	7.95359	7.02059	6.84471	6.4493	6.72465	7.42374	7.23244	7.57861	7.66833	7.38501	7.66535	7.25042	7.20107	7.27673	7.30556	7.33695	7.21914	7.7951	7.61484	8.05983	7.40251	7.80041	7.45057	7.41637	6.70783	7.38354	7.39676	5.68039	7.15108	6.87279	6.67155	6.81758	6.9248	7.84579	7.14483	7.28018	7.11955
E11 Pancreatic Progenitor	1452075_at	Pus10	9.84033	9.77231	9.86418	9.84071	9.152	9.13718	9.19449	9.30652	9.50408	9.52006	8.04566	8.41428	8.17028	8.0012	8.80317	8.6129	8.90629	8.13247	8.21222	8.35647	7.94897	8.31252	8.49858	8.65246	8.48721	8.45881	8.67055	8.63503	8.53948	8.72821	8.38117	8.35679	8.44969	8.06548	8.3043	8.23462	8.49285	8.42129	8.43908	7.79099	7.73346	8.14489	7.79646	7.94395	7.84108	8.13732
E11 Pancreatic Progenitor	1438410_at	Prtg	9.98619	10.3163	10.2239	10.2448	7.12573	7.00658	7.23437	5.65383	5.83791	5.61039	7.84628	7.74735	7.53579	7.25116	6.41537	6.7124	7.09052	7.13174	7.46787	7.04201	7.2781	5.02003	6.62974	4.71537	4.78341	4.93724	7.2153	7.20335	7.14087	6.71447	6.77216	6.8837	6.03604	6.34175	6.55858	6.80723	5.32943	5.86875	4.89698	5.16358	5.18411	4.85916	6.44425	6.68102	6.70467	6.65437
E11 Pancreatic Progenitor	1428090_at	Ptcd3	12.2548	12.2811	12.3454	12.2518	11.54	11.6575	11.5256	11.873	12.1961	11.9352	10.5682	10.6354	10.9249	10.8849	10.8987	11.0866	11.3241	10.8387	11.0108	10.829	10.7077	11.2358	11.6257	11.2565	11.1749	11.0001	10.8796	11.0276	10.9514	11.1042	11.071	10.9428	10.8604	10.8987	10.8083	10.6273	11.5823	10.9625	10.7906	10.7476	10.9347	11.0748	10.6896	10.7419	10.833	10.6462
E11 Pancreatic Progenitor	1450701_a_at	Gtf2h2	10.5233	10.5082	10.584	10.5326	9.51286	9.64406	9.592	9.62639	10.0959	9.84656	8.75162	8.66044	8.23981	8.19167	9.30016	9.24717	9.24992	8.6987	8.64187	8.70616	8.47705	9.0388	8.71274	9.12429	9.1908	8.55092	9.10555	9.47212	9.25664	9.27059	8.90581	9.05556	9.02985	8.43973	8.71971	8.3596	7.04785	8.778	8.77361	8.2633	8.51143	8.0501	8.40669	8.54342	8.29283	8.36159
E11 Pancreatic Progenitor	1435054_at	Eme1	10.3487	10.3793	10.2664	10.334	9.46874	9.39649	9.4338	9.1598	9.93627	9.62296	7.2084	7.10117	7.11552	6.82199	6.95942	7.35964	8.00419	7.4731	6.98918	7.11298	7.73688	6.72774	6.94748	6.3581	6.74311	6.40579	7.54964	8.04082	7.6819	7.53663	8.2511	7.89542	7.79583	7.81309	7.70024	7.82507	7.63793	7.0154	6.82435	7.26087	7.21094	7.74378	7.1133	6.90599	7.30381	5.96897
E11 Pancreatic Progenitor	1455107_at	Srpk1	12.2704	12.2495	12.3282	12.3081	11.7087	11.788	11.4652	11.5418	11.8871	11.6707	10.6567	10.6344	10.8252	10.7457	11.6227	11.5766	11.6767	11.3609	11.2674	11.3618	11.1755	11.3933	11.4474	11.0546	11.3318	11.0543	11.5214	11.572	11.5302	11.6526	11.0281	11.4856	11.492	11.0984	11.0134	10.9334	10.5524	11.3366	11.301	11.2739	11.1877	11.137	11.2345	11.3597	11.1069	10.9556
E11 Pancreatic Progenitor	1429621_at	Cand2	10.0529	10.2008	10.0742	10.1079	8.96326	8.63927	9.28585	7.8657	8.32656	7.67423	7.16476	7.42706	7.50107	6.36958	8.41329	8.64402	8.71543	7.96137	8.03639	7.94875	7.50886	8.66808	9.01927	8.38263	8.34395	8.16962	8.8538	8.9521	8.68393	8.97219	8.45537	8.34849	8.48312	8.10837	8.20746	8.09738	6.39117	6.83784	7.51407	7.4784	7.57612	7.62353	7.8301	8.26681	7.66039	7.28785
E11 Pancreatic Progenitor	1416586_at	Zfp239	9.29527	9.37373	9.34081	9.39516	8.61316	8.45052	8.69457	8.6492	8.69243	8.48636	6.67893	7.36494	7.21132	6.72137	7.91498	8.15118	8.15725	7.54943	7.9471	7.5634	7.72788	8.54079	8.35952	8.11057	8.40083	7.65711	8.16263	8.35778	8.0191	8.14306	7.6496	8.05064	7.90447	7.52827	7.58117	7.88177	8.22694	7.04238	7.56657	7.75386	7.83891	7.82867	7.81473	7.68647	7.47581	7.43668
E11 Pancreatic Progenitor	1427439_s_at	Prmt5	11.915	11.8539	11.9223	11.9536	11.5702	11.587	11.218	10.8243	11.2237	11.2001	10.2763	10.6033	10.6023	10.5023	10.6855	10.6595	10.7757	10.5486	10.4904	10.6911	10.9266	10.4666	9.55126	10.1899	10.5329	10.3071	10.4984	10.8108	10.6053	10.66	10.1985	10.4699	10.1776	10.0351	10.1118	10.2371	8.71085	9.95622	10.1731	10.3219	10.5181	10.5022	10.44	10.4516	10.1204	9.93638
E11 Pancreatic Progenitor	1426223_at	Ttc39c	8.82212	8.92167	8.85249	8.86321	7.5946	7.58247	8.04871	7.27452	7.83095	6.97878	7.09231	6.38145	6.47874	6.62613	7.61357	7.94866	8.24971	7.41847	6.7996	6.90173	6.05871	7.96835	8.34341	7.57184	7.24947	7.46	7.21322	6.57251	6.7607	7.05112	7.79868	7.42837	7.24086	7.77596	7.48724	7.26832	5.63717	6.38833	6.63938	6.43358	6.26356	6.62588	6.82415	7.14264	7.23476	6.92689
E11 Pancreatic Progenitor	1449645_s_at	Cct3	12.2832	12.1792	12.2231	12.3001	11.3906	11.4661	11.3862	11.371	11.7663	11.5427	10.2406	10.4161	10.3435	10.4305	11.0548	10.8814	11.2231	10.3886	10.5143	10.3975	10.3009	10.0372	9.41184	10.2389	10.2397	9.90941	11.2581	10.7582	10.6374	11.3468	10.5949	10.8773	10.7032	10.3105	10.6374	10.5237	11.0457	10.6035	10.7222	10.2252	10.4157	9.84699	9.65524	10.1461	9.85761	9.30866
E11 Pancreatic Progenitor	1452344_at	Synj2	10.2116	10.2076	10.1745	10.211	8.90948	9.00084	8.90617	8.78801	9.01527	9.40411	8.76448	9.6431	9.49768	9.24452	7.98953	8.03605	8.30232	8.53515	8.24734	8.00804	7.82223	9.05777	9.58464	7.80168	8.29971	7.07308	7.31398	7.38925	7.23868	7.52787	7.52203	7.49535	7.61456	7.74248	7.94464	7.58816	8.67436	7.9224	8.05799	7.737	7.99973	8.42289	8.51121	8.46613	8.17162	7.69322
E11 Pancreatic Progenitor	1434570_at	Bend3	11.945	11.9809	11.9546	11.9403	11.5896	11.5683	11.4395	10.9738	11.3433	11.0708	10.6625	10.334	10.5659	10.6492	11.0886	11.1697	11.2463	10.9671	10.9062	11.2321	10.9562	10.2122	9.54787	10.3508	9.91254	10.3811	10.8589	10.9027	10.6559	10.8148	10.5063	10.6443	10.6074	10.4704	10.4948	10.2135	10.8743	10.0013	10.3168	10.6141	10.5234	10.2539	10.0759	10.3114	10.1113	10.1613
E11 Pancreatic Progenitor	1454908_x_at	Serf1	9.82224	9.84729	9.83108	9.88158	9.32337	9.37122	8.91913	9.45183	9.46635	9.32279	7.64815	7.8237	8.23219	7.99673	8.91301	8.91336	8.84684	8.25009	7.91833	7.75549	7.99065	8.325	7.99268	7.84653	8.09154	8.3753	8.72138	8.54327	8.85657	8.72204	8.54295	8.36969	8.54748	8.16723	8.53957	8.19959	8.21846	7.71215	8.06055	7.88902	7.79536	8.14016	7.97544	7.81985	7.70805	7.3788
E11 Pancreatic Progenitor	1452824_at	D1Bwg0212e	8.18365	8.12324	8.15252	8.20179	7.24391	7.63918	7.31644	6.90653	7.41731	7.69039	6.67352	6.48677	6.89297	6.43259	7.01143	6.87411	7.50562	6.8016	6.69388	7.41014	6.84454	6.03436	6.06194	6.52902	6.45031	6.42486	7.00589	6.60648	6.47472	7.01596	6.30781	7.29922	6.82749	6.35034	7.00759	6.68388	8.01361	7.37536	7.51536	7.23254	6.94899	6.01751	6.28506	6.92508	6.48784	6.54187
E11 Pancreatic Progenitor	1424448_at	Trim6	9.16886	9.14402	9.28593	9.1983	8.22569	7.86955	8.39214	7.08192	6.92952	7.25836	6.2019	6.26368	7.53754	6.52473	6.64308	6.47025	6.84577	8.38539	8.03857	7.29722	8.3091	7.4999	8.35737	6.89671	7.955	7.19647	6.83485	6.00411	6.82411	5.94486	8.1102	6.95294	6.58134	6.02235	6.79557	8.15283	5.72047	6.50972	7.13324	6.16454	6.70631	5.86178	7.06762	7.80831	7.88265	7.14525
E11 Pancreatic Progenitor	1426022_a_at	Vill	10.1801	10.243	10.0284	10.3066	9.90757	9.76503	10.1632	8.34497	8.22292	7.77836	8.53107	8.06197	8.33262	8.60902	7.31451	7.74947	7.72565	7.66484	6.67663	6.93954	7.07532	7.40883	7.40779	6.68008	6.90097	6.77641	6.69653	6.9227	6.48259	6.67867	6.74177	6.45196	6.84156	7.02324	7.08877	7.2873	7.23277	6.05428	5.69517	6.81963	6.18714	6.84959	7.53401	7.36523	7.57905	7.14785
E11 Pancreatic Progenitor	1450873_at	Gtpbp4	10.5607	10.6774	10.5849	10.5884	9.661	9.95229	10.0431	10.0514	10.2586	10.2635	9.70678	9.58405	9.54858	9.39584	9.62803	9.58938	9.76154	9.02007	8.94924	9.2269	8.83683	8.85845	8.42631	8.8594	8.47713	8.90656	9.70132	9.22678	9.46555	9.31263	8.91982	9.38838	9.25831	9.00276	9.28386	8.85052	9.61194	9.3802	9.6078	9.01314	8.86947	8.687	8.41803	8.79442	8.73623	8.59858
E11 Pancreatic Progenitor	1450685_at	Arpp19	11.9736	11.9554	11.9357	11.9979	11.1777	11.0495	11.2542	10.7564	10.8143	10.6871	10.6945	10.7352	10.7437	10.829	10.8629	10.9647	11.1804	10.8758	10.6985	10.8223	10.7355	9.66927	9.89854	10.0031	10.0065	9.65403	10.938	11.0412	11.0834	10.9558	11.0817	10.6618	10.7241	10.6485	10.5834	10.3797	8.3896	10.4533	10.6407	10.1775	10.4322	10.283	9.86256	9.96405	10.3479	10.2422
E11 Pancreatic Progenitor	1429595_at	2700049A03Rik	10.4112	10.2856	10.2587	10.2748	9.74855	9.52992	9.82652	8.64007	9.03371	8.55874	8.55301	9.09934	8.68642	9.33108	9.22773	9.27971	9.6147	8.03257	8.04977	8.08105	8.25463	8.62006	8.8791	8.99816	8.95148	8.35137	8.88073	9.22262	9.01033	9.05296	9.10783	9.00626	9.08157	8.58447	8.19018	8.56792	8.69795	7.70597	8.25173	8.23973	8.45254	9.09614	8.23511	8.33678	8.22848	8.29138
E11 Pancreatic Progenitor	1433273_at	Nkain1	9.43566	9.45086	9.25506	9.19223	7.35337	7.25006	7.39828	7.00519	7.23962	6.79951	4.91757	4.97646	5.42724	4.7806	7.54288	7.28789	7.95898	6.48461	5.94241	6.09931	6.20924	5.04907	5.95948	5.86367	5.18243	6.11202	7.75341	7.90475	7.73508	8.13318	7.134	7.29895	7.00018	6.73687	6.82314	6.61061	6.64665	4.92361	5.84974	5.55853	6.45495	6.22358	6.07182	6.13428	6.45786	6.57658
E11 Pancreatic Progenitor	1437186_at	BC055324	11.1515	11.2665	11.1381	11.2712	10.5818	10.4814	10.8615	10.2531	10.4987	10.1615	7.58572	8.01536	7.4974	7.75391	8.95908	9.25977	9.53031	9.35202	9.19883	9.3749	9.23092	7.99556	7.41972	7.76959	8.23066	8.42351	8.92657	8.83934	8.88894	8.68936	9.36052	9.08838	8.94027	9.15496	9.02054	9.15742	8.36507	8.37055	8.15564	7.86244	8.21697	8.2838	7.89727	7.87973	7.48071	7.164
E11 Pancreatic Progenitor	1416389_a_at	Rcbtb2	11.4846	11.5005	11.5316	11.4911	10.7444	10.795	10.6603	10.4984	10.7807	10.5588	9.9864	10.1605	9.67799	9.77869	10.4071	10.4592	10.6122	9.71568	9.42395	9.44906	9.15172	9.4719	9.96497	9.07879	9.0846	8.90971	9.83564	9.24567	9.27999	9.54801	9.70478	9.6721	9.66971	9.94998	9.88186	9.97916	7.79863	9.806	9.8644	9.69549	10.1069	10.2749	10.4839	10.7497	10.4205	10.3721
E11 Pancreatic Progenitor	1423517_at	Cct6a	13.2161	13.237	13.219	13.2782	12.6758	12.6981	12.7096	12.5895	12.7075	12.7217	11.7419	11.9048	11.723	11.6771	12.3813	12.466	12.5076	11.6345	12.379	12.2959	11.8344	11.8831	12.2404	11.9323	11.9156	12.0784	12.4372	12.4492	12.5922	12.5691	12.1578	12.4361	12.3336	11.9396	11.9673	11.8705	12.3255	11.7133	11.8302	11.6551	11.4496	11.3724	11.257	11.3276	11.2146	11.2825
E11 Pancreatic Progenitor	1428310_at	Larp7	11.6302	11.5958	11.4954	11.5417	11.0295	10.9735	11.0961	10.788	11.0713	10.8917	10.5923	10.8082	10.6393	10.7369	9.96423	10.125	10.5486	10.0165	10.2463	9.83788	9.72016	9.64879	10.4335	10.1365	10.079	9.22745	10.2244	10.1366	9.92116	10.1127	10.4341	10.2629	10.4817	10.2822	10.3424	10.1102	10.5765	9.88956	9.83385	9.63524	9.51427	10.0508	9.64115	9.41092	9.50432	9.56465
E11 Pancreatic Progenitor	1456066_a_at	Polr1a	9.21162	9.15436	9.21531	9.1444	8.40805	8.5081	8.38005	8.73868	9.0367	9.05015	7.41756	7.40183	7.77194	7.68042	7.78762	7.90479	7.91029	7.48923	8.37769	7.98958	6.59371	7.72261	8.15281	8.15283	7.70505	7.36253	7.62505	7.13248	7.7558	7.96627	7.54448	7.59426	7.59317	8.14774	7.52527	7.71474	8.46478	7.83805	7.37804	8.17351	8.44704	8.55748	8.17166	8.12525	7.99666	7.95515
E11 Pancreatic Progenitor	1436473_at	Zfp248	8.96145	8.91855	8.8821	8.90458	7.68062	7.55442	8.02395	7.14623	7.47707	7.60975	6.70722	6.43938	6.16015	6.12196	6.75374	6.95252	7.13884	6.88416	7.47689	6.60247	7.02823	8.21631	7.54203	7.90591	9.72926	7.7845	7.63866	7.36765	7.44682	7.27325	6.77401	7.28538	6.86297	7.28468	7.03344	7.37003	5.61454	6.21397	7.0609	6.7783	7.48601	7.37176	7.35032	7.5637	7.45495	7.65246
E11 Pancreatic Progenitor	1455297_at	Spin2	9.62948	9.73762	9.79316	9.73353	8.50016	8.42605	8.55408	8.1731	8.38674	8.25501	6.66373	7.3461	6.65029	7.64419	7.62985	8.09107	8.27546	8.3161	9.14333	8.83996	8.30843	9.52484	8.91408	8.8631	8.94799	8.52414	8.42469	8.61923	8.32619	8.42837	7.77851	8.10967	7.72363	7.77396	7.79277	7.67313	8.86465	7.55519	7.68263	7.55567	7.67194	7.50987	7.59655	7.52053	7.81145	7.65062
E11 Pancreatic Progenitor	1416859_at	Fkbp3	13.1338	13.0972	13.1955	13.1657	12.6553	12.7271	12.6403	12.474	12.7571	12.6956	10.8976	11.2473	11.0815	11.1014	11.9166	12.0176	12.3588	12.0508	12.0584	11.8773	11.9253	12.141	12.3029	12.1449	12.0411	12.0311	12.2244	12.3675	12.4512	12.4153	12.1583	12.1671	12.1671	12.0925	12.039	12.1062	12.3277	12.0302	11.9347	11.6456	11.8011	11.9123	11.7799	11.619	11.6054	11.5819
E11 Pancreatic Progenitor	1415772_at	Ncl	11.7857	11.7093	11.7473	11.7087	11.3099	11.5166	11.0092	11.2647	11.907	11.3608	10.7136	10.7024	10.8041	10.7829	9.97817	9.99706	10.3009	10.2452	10.4819	10.0792	10.4348	10.1706	9.94467	9.6658	9.65691	9.46021	9.84636	10.0002	9.92873	9.6451	10.3303	9.96438	9.66445	10.1247	9.92517	9.81002	10.866	9.39604	9.51994	10.0726	9.96416	10.3071	10.1671	9.96971	10.0243	9.65565
E11 Pancreatic Progenitor	1452341_at	Echs1	11.1823	11.1138	11.0855	11.071	10.856	10.8714	10.5338	10.915	10.8439	10.8955	9.41014	10.2066	10.2358	10.2014	9.9801	10.0101	10.29	9.66001	9.36055	9.25862	9.29477	9.94237	9.81373	9.58853	9.4949	9.42922	9.68062	9.82595	9.82917	10.038	9.88328	9.80344	9.99047	9.37811	9.69222	9.93833	8.84555	9.77128	10.1401	9.49603	9.51505	9.68205	9.53617	9.75118	9.61798	9.59112
E11 Pancreatic Progenitor	1431415_a_at	Tbpl1	10.9994	11.0555	11.0553	11.1018	9.96868	10.0612	10.1608	9.90526	10.1922	10.2332	9.76605	9.55447	9.4579	9.24247	10.6114	10.6996	10.9787	9.92209	10.3595	10.2082	10.0729	9.45997	9.55121	9.3423	9.41279	9.36489	10.3332	10.2664	10.3677	10.4227	10.3845	10.5286	10.8217	9.78807	10.0118	9.934	9.46768	10.242	10.1502	9.67232	9.75522	9.85999	9.75483	9.91815	9.73062	9.60137
E11 Pancreatic Progenitor	1417390_at	Gpn1	11.4929	11.5425	11.4017	11.475	10.9059	10.8809	10.991	10.9044	11.1771	10.772	9.73932	10.0589	10.2515	10.1432	10.1563	10.4088	10.4635	9.91597	9.79611	9.66197	9.63321	10.5315	10.9425	10.6048	10.2969	10.2293	10.2478	10.1866	10.0606	10.3029	10.5527	10.2878	10.2954	10.4927	10.2725	10.1005	9.96617	9.86688	10.0292	10.2197	10.1696	10.3252	10.4064	10.0635	9.95707	9.96541
E11 Pancreatic Progenitor	1436541_at	2310008H09Rik	10.6866	10.6832	10.5633	10.6174	10.0618	10.1806	10.1441	9.95312	10.3587	10.0307	9.12182	9.1083	9.16316	9.11956	9.18105	9.47289	9.8068	9.69011	9.40758	9.00305	9.56274	7.88384	8.55992	8.39598	8.6282	7.72869	9.32431	9.27808	8.91907	9.15948	9.18324	9.08057	8.65863	9.25292	9.03862	8.86271	8.08494	8.25286	8.84696	8.63327	9.17514	9.58236	9.15757	8.83427	8.7316	8.56517
E11 Pancreatic Progenitor	1455706_at	Stxbp4	10.5344	10.4727	10.5942	10.4865	9.65109	9.47168	10.2189	8.56976	9.21135	8.93428	9.25836	9.72792	9.74536	9.43449	9.50075	9.68243	10.3497	9.56121	9.34983	9.28037	9.17105	9.24452	9.79745	9.63626	9.4591	9.54209	9.77315	9.49733	9.58133	9.05463	9.43159	9.57273	9.82282	8.96754	8.78003	9.37088	10.2312	9.00791	9.37208	9.0416	9.0546	9.02642	9.06873	9.42224	9.02632	8.97624
E11 Pancreatic Progenitor	1417041_at	Polr1c	10.9633	11.0589	10.989	11.0471	10.4844	10.5218	10.5661	10.4569	10.6796	10.5227	10.3718	10.4196	10.3358	10.5225	10.1139	10.0709	10.304	9.19711	9.55852	9.27805	9.2784	9.73121	10.0268	10.0302	9.73029	9.80371	10.1736	9.90276	9.80586	10.0819	10.1061	10.2761	10.1167	9.94841	10.0917	10.087	10.3779	9.51623	9.80686	9.76697	9.71585	9.63973	9.34392	9.77572	9.70394	9.47933
E11 Pancreatic Progenitor	1423314_s_at	Pde7a	8.95046	8.83984	9.1051	9.03211	7.32786	7.43561	7.61972	7.24649	7.7113	7.82512	7.22782	7.25592	7.23802	6.64206	7.44218	7.51903	7.78131	6.83641	6.77423	6.26852	6.60143	5.68892	6.64828	6.90903	6.70959	7.13098	6.68904	6.96823	7.00043	6.65958	5.70244	6.07551	6.86934	5.88217	6.09795	5.73999	4.68152	6.96823	6.14287	6.04612	6.26589	6.28709	6.50722	6.56328	5.75239	6.16997
E11 Pancreatic Progenitor	1418947_at	Nek3	10.4613	10.509	10.4319	10.4406	9.80562	9.72281	9.89706	9.03099	9.12717	8.744	8.88012	9.45987	9.3954	9.15707	9.39258	9.45542	9.93791	8.91057	8.80897	8.82179	8.65778	10.0866	10.3337	9.96326	9.75191	9.11461	9.43833	9.57479	9.65308	9.82044	9.51784	9.38705	9.61674	9.32205	9.0634	9.30681	9.60562	8.61941	8.89472	9.32802	9.58091	9.88817	10.2656	9.74896	9.56229	9.33643
E11 Pancreatic Progenitor	1452414_s_at	Ccdc86	10.6689	10.5968	10.58	10.5624	9.8426	9.94021	9.77748	10.0921	10.4775	10.0362	9.66902	9.46998	10.1866	10.0514	8.98467	8.9825	9.48127	8.35839	8.91588	8.65462	8.20875	8.97746	9.02301	9.29287	8.84413	9.07542	9.35968	9.75003	9.7491	9.80638	9.3577	9.49541	9.15125	9.55037	9.40573	8.99686	10.186	9.10791	8.96355	9.24545	9.45762	9.4585	8.97916	9.03611	8.87559	8.54509
E11 Pancreatic Progenitor	1440634_at	Gpc6	8.94391	8.78472	9.01911	8.79158	8.22659	7.82369	7.26009	7.04582	7.05352	6.98485	8.59783	8.27639	8.07238	8.28333	5.70939	5.21809	5.71836	5.91394	6.56524	5.88986	5.56699	6.33319	6.24211	7.45988	6.8707	7.32545	5.78649	5.96635	6.1012	6.23815	6.29691	6.00879	6.58957	6.54991	6.57896	6.91023	5.8975	5.73664	5.45257	5.07327	5.83921	5.3373	5.83969	5.87971	5.46884	5.43838
E11 Pancreatic Progenitor	1455511_at	Sephs1	8.77809	8.72187	8.74549	8.79894	8.48198	8.34581	8.35754	8.11036	8.40381	8.07699	7.7808	7.61501	8.25243	7.83198	7.52	7.841	8.113	7.92647	8.02181	7.75635	7.78493	7.54612	7.05548	7.51382	7.25783	6.68674	7.64208	7.76094	7.73539	7.69328	7.81065	7.45985	7.44136	7.48407	7.933	7.72036	7.523	7.17104	7.42365	6.50965	7.11486	7.33605	6.89087	6.90864	6.78202	6.60145
E11 Pancreatic Progenitor	1423503_at	Jam3	9.61661	9.64299	9.83121	9.70514	6.77904	6.85063	6.73662	6.79781	7.54136	7.25943	4.91948	5.3033	5.63809	5.315	8.09082	8.19563	8.45162	8.18932	8.04387	7.9149	8.00086	7.03454	7.24201	7.17631	7.15958	6.93982	8.46095	8.58097	8.12847	8.48978	8.36171	8.10227	8.71027	7.97303	8.49576	8.18639	8.4058	8.02491	7.34131	6.70432	6.3389	6.38838	7.0587	6.78119	6.51375	6.26048
E11 Pancreatic Progenitor	1439816_at	Gm10567	10.2367	10.472	10.3898	10.2551	7.83321	7.68882	6.97126	6.91534	7.23813	5.96397	8.48608	8.52275	8.26444	8.08375	7.95267	7.64848	7.49447	8.60171	8.85397	8.95262	8.41364	8.72217	8.89102	9.2133	9.16847	8.70226	8.88891	7.91861	7.82157	7.83765	6.5151	7.64502	7.37736	8.05503	8.71551	8.76372	5.69635	7.08146	7.83041	7.27849	7.18525	7.26546	8.22172	8.53185	9.63681	10.0387
E11 Pancreatic Progenitor	1440999_at	Zfp697	10.2873	10.3304	10.1473	10.1246	9.2275	9.08638	9.29136	8.79391	8.44513	8.98089	7.45833	7.38012	7.41135	5.90359	8.8345	8.90328	8.93007	8.60935	8.0356	7.75193	8.48089	8.16165	7.45809	7.9553	8.06774	7.82136	8.84527	8.67289	8.70864	8.45215	8.01136	7.76123	7.89302	7.94903	8.4078	8.11634	6.10422	7.67966	8.16306	8.27671	8.44502	8.26618	8.6366	9.10381	8.86219	9.15746
E11 Pancreatic Progenitor	1449383_at	Adssl1	8.53019	8.38539	8.4986	8.57414	7.75452	7.53709	8.07207	7.08727	6.96608	6.87458	7.6199	7.53363	7.55148	6.97271	6.69316	6.584	6.97863	6.50105	7.29712	7.22896	7.0057	5.55713	5.32864	5.67505	5.22862	4.93662	7.14471	7.40315	6.86956	7.23339	6.37862	6.75206	7.45862	6.53122	6.67226	6.54583	6.5219	7.0559	6.57256	5.77153	5.45078	5.44659	7.18001	6.44737	6.57711	6.4013
E11 Pancreatic Progenitor	1418372_at	Adsl	11.2826	11.1545	11.1862	11.2093	10.8412	11.0884	10.6598	10.9408	11.4387	11.1942	9.51766	9.51929	9.68955	9.59299	9.97687	10.0035	10.381	9.26105	9.41205	9.30153	9.08149	10.0514	9.95059	9.80095	9.26541	9.0107	10.0664	9.73401	9.60619	10.0004	10.0292	9.96034	9.69199	9.92005	9.871	9.68663	10.217	9.87729	9.79994	9.59681	9.74684	9.95103	9.61896	9.53093	9.42493	9.17803
E11 Pancreatic Progenitor	1417675_a_at	Mdn1	9.87249	9.90519	9.93258	9.92614	9.62442	9.696	9.24815	9.59903	9.92531	9.7734	8.74381	8.55264	8.53425	8.55484	8.77601	8.79393	8.67597	8.79429	9.11147	9.40418	9.11938	8.60438	8.28346	9.08639	9.40911	9.11376	8.92997	8.97493	9.12213	9.02985	8.74289	8.75074	8.92288	8.53401	8.90027	8.51093	8.45393	9.35218	9.02721	8.7684	8.43462	8.06931	8.11135	8.43261	8.41057	8.52594
E11 Pancreatic Progenitor	1425255_s_at	Hnrpll	12.0114	12.0776	12.1095	12.0584	11.7367	11.6823	11.9045	11.6304	11.8144	11.8386	10.7504	10.5827	10.442	10.4455	11.0459	11.2528	11.3344	10.7809	10.9104	10.6479	10.6804	10.2735	10.8257	10.8516	10.6175	10.6511	11.0615	10.9593	11.0691	11.0704	11.126	11.0176	11.146	10.913	10.9181	10.8099	9.5136	10.3339	10.5643	10.1003	10.0328	10.252	10.2983	10.2036	10.1005	10.1539
E11 Pancreatic Progenitor	1416362_a_at	Fkbp4	12.4162	12.3474	12.2388	12.3574	11.8273	11.7887	11.8741	11.8256	12.0805	11.7301	9.98825	10.6079	10.3104	10.5466	11.0394	11.0875	11.3596	10.0364	10.168	9.74204	9.69923	10.3452	10.9076	10.9656	10.3742	10.0649	11.1981	11.2231	11.1596	11.3571	10.8245	10.9623	10.9211	10.6045	10.453	10.325	11.7525	10.5219	10.9781	10.7865	10.587	10.9495	10.6869	10.333	9.97358	10.5989
E11 Pancreatic Progenitor	1451092_a_at	Rangap1	10.7366	10.7771	10.7977	10.7716	10.3147	10.4592	10.5426	10.3455	10.6108	10.4058	9.56621	9.26138	9.59783	9.46894	9.72172	9.84878	9.99617	9.49017	8.80241	9.1632	9.22671	9.41944	9.03193	9.44867	9.09175	9.04607	9.79432	9.95	9.99853	9.96459	9.75963	9.78378	9.78924	9.61258	9.25253	9.38875	10.1589	9.19348	9.85185	10.3054	10.2235	10.2503	9.80267	9.85946	9.54794	9.53524
E11 Pancreatic Progenitor	1435783_at	Fam169a	10.0368	9.9518	10.0104	10.0829	8.79601	8.91361	8.38313	9.06158	9.41943	9.35956	8.37592	7.5014	7.40561	6.94421	8.50125	8.1091	8.48317	8.36838	8.7201	9.01287	8.73047	8.50772	7.92065	9.13357	9.04313	9.6393	9.15577	9.14157	9.09754	9.01631	8.58623	8.54909	8.75547	7.84209	8.03274	7.58336	9.33118	9.04095	9.78919	8.21014	8.35077	8.06167	8.73261	8.76785	8.58006	8.99752
E11 Pancreatic Progenitor	1422859_a_at	Rpl23	11.2084	11.1123	11.2214	11.181	10.7138	11.036	10.4236	10.8187	11.1844	10.9556	9.91201	9.97618	9.88214	9.69571	10.3065	10.3655	10.7256	9.93658	10.1619	10.079	9.90443	10.1129	10.7508	9.96058	9.78699	9.7728	9.47684	9.47719	9.74712	9.6369	10.5423	9.80333	9.86	9.77276	9.89714	9.77444	9.88476	9.36521	9.47039	9.13923	9.32946	9.62718	9.62763	9.28623	9.19042	9.01781
E11 Pancreatic Progenitor	1418839_at	Glmn	9.73632	9.85543	9.81678	9.82702	8.87375	8.92449	8.85731	9.36708	9.70148	9.45139	7.51582	7.88278	7.8635	7.74682	8.58375	8.68334	8.85111	9.03614	9.51093	9.19663	8.96387	9.20806	9.42103	8.81853	8.3498	7.97129	8.7178	8.6342	8.3594	8.83812	8.58216	8.04133	8.03597	8.92193	8.59102	8.18663	8.89947	8.03008	8.22275	8.02942	8.582	8.59683	8.3023	8.21272	7.98509	8.00614
E11 Pancreatic Progenitor	1428522_at	Ttf2	9.86239	10.0896	9.92458	9.85421	9.372	9.55903	9.61847	9.29343	9.97924	9.56689	7.30815	7.35231	7.26524	7.266	7.44227	7.89304	8.22007	7.82789	7.91207	7.12213	7.70856	7.27891	7.69364	7.07285	7.05166	7.09572	7.99742	7.59653	7.46597	7.81968	7.93177	7.7969	7.7689	8.21401	8.21443	8.11817	5.60191	7.28459	7.02558	6.54034	6.89468	7.26344	7.27225	7.07876	7.1162	6.57678
E11 Pancreatic Progenitor	1436799_at	Enox1	9.61923	9.6731	9.65959	9.62166	8.24036	8.22177	8.659	6.93058	7.31014	7.64755	4.88664	4.65227	5.07009	4.64567	7.49026	7.32462	7.61528	7.83885	8.70976	7.67546	7.43875	7.30004	7.85499	7.61967	7.59441	7.217	7.97436	8.03451	7.71868	7.8749	7.57996	8.18085	8.02888	8.03548	8.09693	7.69986	8.35423	7.33465	8.10165	7.56789	7.72826	7.78007	7.50978	8.11555	7.52193	7.42347
E11 Pancreatic Progenitor	1415909_at	Stip1	12.3397	12.3995	12.3071	12.3415	11.7683	11.8431	11.6302	11.4776	11.6887	11.6996	10.8016	11.2313	10.9139	10.9784	11.9687	12.0473	11.9524	10.9718	10.9717	10.7576	10.8946	10.6738	11.0697	11.0189	11.3631	10.9762	11.7667	11.6075	11.7433	11.6807	11.6043	11.9063	11.5967	10.458	10.3229	10.5294	11.2798	10.9714	11.0203	10.8637	10.3208	10.6091	10.6547	10.3124	10.2937	10.3931
E11 Pancreatic Progenitor	1458942_at	C230037E05Rik	10.0979	10.0035	10.1282	10.1136	9.2755	9.05435	9.12718	7.74025	8.01558	8.02909	8.40856	9.32218	9.23608	9.28225	9.17679	9.3	8.92341	8.70754	9.47943	9.59544	9.00466	8.91896	9.81674	9.24363	9.58658	9.45733	8.23163	8.84883	8.91111	8.83935	9.39591	9.05502	9.11363	8.66463	8.09556	8.69643	8.12826	7.7508	8.05886	8.57815	8.66488	8.50825	8.78063	8.49885	8.35413	7.30754
E11 Pancreatic Progenitor	1429787_x_at	Zwint	10.4099	10.4658	10.4954	10.4414	9.45226	9.5288	9.83611	9.48373	9.8835	9.66021	9.57743	9.99487	10.1619	9.78046	9.61428	9.63221	9.88473	9.13571	9.81474	9.68353	9.33456	9.65335	10.503	9.53714	9.63134	9.48999	9.67326	9.64919	9.27955	9.62726	9.24131	9.43927	9.08308	9.37269	9.1919	8.84981	10.084	9.18934	8.86025	8.94975	8.8053	8.87696	8.63382	8.4616	8.75387	8.29653
E11 Pancreatic Progenitor	1416781_at	Praf2	10.5151	10.5134	10.4531	10.3899	9.65803	9.70207	9.30613	9.68947	10.0015	9.82225	9.1377	9.54978	9.59817	9.36621	8.9012	8.9519	9.43119	9.41305	8.51973	8.49951	9.14518	8.66225	8.56446	8.83165	8.97992	8.39574	8.94487	9.01805	9.00349	9.26221	10.3064	9.42927	10.0977	9.58359	10.0039	10.1176	8.22788	8.64834	8.52768	7.84821	8.01199	8.18051	8.87913	8.80203	8.66626	8.48301
E11 Pancreatic Progenitor	1416360_at	Snx18	9.75815	9.85598	9.87039	9.7808	8.64557	9.05376	8.01757	8.21179	8.35094	8.88424	9.28444	9.05418	8.81568	8.52909	8.80778	9.07032	9.3216	8.06539	8.34336	8.71266	8.13339	7.20948	7.06336	8.68872	8.70335	8.76793	8.6149	9.09426	9.02443	8.79555	8.58243	9.07339	9.26235	7.41961	8.41484	8.30238	9.25241	8.77432	8.45062	7.8652	7.26935	7.6961	7.99983	7.86206	7.76358	9.02616
E11 Pancreatic Progenitor	1428061_at	Hat1	12.0152	12.0612	12.0056	11.9909	11.8868	11.8811	11.9702	11.8061	12.1446	11.7997	11.3387	11.2777	11.1452	11.1868	10.5882	10.7271	11.052	11.0284	11.0922	10.9534	10.6291	10.8217	10.7615	10.8461	10.8839	10.5208	10.4726	10.2781	10.5413	10.3995	11.0077	10.8046	10.7917	10.884	10.7762	10.9463	10.4686	10.6774	10.3259	10.4117	10.329	10.6067	10.6593	10.4786	10.5718	9.864
E11 Pancreatic Progenitor	1454197_a_at	Ccdc86	10.9752	10.911	10.8166	10.9366	10.2068	10.3558	10.0519	10.2701	10.6438	10.3631	9.62293	9.62791	10.2323	10.2397	9.333	9.27764	9.65061	8.32536	8.65798	8.65469	8.04442	8.82463	8.61803	8.98843	8.58367	8.69455	9.80576	9.97784	9.9922	10.0291	9.59642	9.74402	9.36312	9.77747	9.83532	9.29468	10.0818	9.30266	9.23451	9.55855	9.67656	9.45136	9.23575	9.33641	9.04236	8.57384
E11 Pancreatic Progenitor	1426695_at	9030624J02Rik	11.4338	11.5461	11.4266	11.4556	11.0413	11.0236	11.1355	10.7606	10.802	10.7558	9.55721	9.57134	9.55262	9.68947	10.6299	10.7101	10.61	10.5679	10.4526	10.5898	10.6412	10.2782	8.8441	9.74914	9.68431	9.14245	10.6665	10.2608	10.473	10.7069	10.0458	10.3811	10.0855	10.3013	10.2286	10.1873	11.1407	10.476	10.6339	10.1346	10.3424	10.281	10.0336	9.9471	9.87733	9.91566
E11 Pancreatic Progenitor	1420747_at	Ppnr	8.88122	8.74138	8.91217	8.90057	8.5552	8.16834	8.27444	7.52062	7.97524	8.19906	8.53755	8.11499	8.41998	8.24878	7.37874	7.51894	7.13826	6.94889	6.87042	6.52724	6.62559	6.52195	7.34994	7.8837	7.52142	8.04167	6.17204	6.41113	6.57932	6.80667	7.76858	6.89232	7.01983	7.08273	6.65273	7.24862	6.86599	7.01239	6.58471	7.29632	7.33131	7.3856	7.38202	7.34268	7.01294	6.97901
E11 Pancreatic Progenitor	1424500_at	Utp6	10.032	10.0537	9.95701	9.90611	9.61633	9.60407	9.65126	9.70121	10.2355	9.83543	8.12098	8.31137	7.86287	7.49458	8.58347	8.48697	8.93716	8.54818	8.54857	8.27989	8.00718	8.92401	9.39181	7.96466	7.85209	7.36824	8.53434	8.34843	8.50997	8.51239	8.44465	8.48125	8.56664	8.3926	8.38608	8.14653	9.06555	8.29239	8.53214	8.19208	8.28676	8.71841	8.35351	8.09766	8.20387	8.45916
E11 Pancreatic Progenitor	1427496_at	Cep152	9.23119	9.33974	9.22754	9.41645	8.75164	8.51084	8.96316	8.89261	9.23301	8.7541	6.77108	7.56635	7.2623	7.41539	7.35388	7.43047	7.84159	7.51161	7.48069	7.4356	7.14325	7.05154	7.50543	7.40219	7.0375	7.20549	7.61484	7.37874	7.28533	7.54009	8.11234	7.96912	8.16834	7.86206	7.84208	8.11534	8.29487	7.7491	7.14209	7.1222	7.3601	7.64429	7.80581	7.18562	6.94509	6.98598
E11 Pancreatic Progenitor	1445773_at	Meis1	9.58353	9.52421	9.62257	9.46459	8.9171	8.58125	7.62914	8.02848	8.57658	8.70303	7.19036	8.66451	7.88264	8.31648	8.42847	8.08359	7.49787	7.69109	6.4571	7.332	8.64213	5.76879	5.53383	8.52546	8.8353	8.64942	6.99887	7.77197	7.90482	7.69401	8.44101	8.31646	8.01575	7.77542	6.7547	7.70905	6.90389	7.52226	7.44863	8.37282	8.22509	7.69243	7.7552	8.411	7.75367	8.69909
E11 Pancreatic Progenitor	1451109_a_at	Nedd4	11.8951	11.9096	11.9926	11.9989	11.573	11.4577	11.9245	11.2153	11.5237	11.4992	9.8655	10.3128	9.91632	9.68276	11.0033	11.026	11.2952	10.6718	10.5859	10.5245	10.4099	9.77042	10.1536	9.90879	9.85259	9.61266	11.2128	10.6201	10.7037	10.7603	11.0265	10.5266	10.773	10.8674	11.0503	11.024	11.0706	10.5612	10.1638	10.2307	9.81429	10.104	9.98376	9.73739	9.51218	9.38693
E11 Pancreatic Progenitor	1420095_s_at	Zscan21	11.0509	11.0265	10.9346	10.9689	10.7681	10.6393	10.9092	10.1278	10.4047	10.1106	9.77526	10.1898	10.1859	10.1659	10.4152	10.4897	10.7505	9.94252	9.61748	9.53613	9.37144	10.0313	10.4675	9.67569	9.61693	9.63771	9.81509	9.89248	9.80063	9.79853	9.97459	9.92194	9.79757	10.2741	10.0073	9.93466	8.18686	9.38621	9.55358	9.58167	9.65504	9.86957	9.64017	9.52423	9.63582	9.54233
E11 Pancreatic Progenitor	1449349_at	Nudt1	11.4496	11.293	11.1859	11.3431	11.1391	11.0521	10.8873	10.9269	11.1249	10.8281	9.11312	9.49682	9.31049	9.42129	9.2663	9.52586	9.90952	8.62043	8.02774	7.9431	8.96837	8.68295	9.21764	8.36827	7.94937	7.66468	9.20379	9.33361	9.47613	9.39487	9.54771	9.48179	9.55349	8.87776	9.19911	9.40408	9.49518	8.68357	8.38699	8.17493	8.03121	8.32861	8.81148	8.69561	8.53053	8.14791
E11 Pancreatic Progenitor	1416842_at	Gstm5	12.6219	12.6	12.6009	12.5366	11.5075	11.7611	11.4117	12.0811	12.096	11.925	12.0828	12.2972	12.2589	12.2035	10.9591	11.1118	11.5849	10.9832	10.9163	10.4959	10.2013	11.036	11.3105	11.7232	11.6267	11.5626	11.8352	11.6976	11.7163	11.889	11.9209	11.8526	12.0474	11.4506	11.5058	11.6241	11.781	10.9116	11.3166	10.6003	10.5948	10.5912	11.5022	11.6065	11.3349	11.3551
E11 Pancreatic Progenitor	1422692_at	Sub1	10.1557	10.1168	10.1908	10.106	9.29482	9.13267	8.9872	8.57966	8.35631	8.93673	9.3618	8.89387	9.2478	8.99808	9.1364	9.04562	9.03087	9.09885	9.30347	9.63935	9.3807	7.547	6.97831	8.49377	9.04282	8.18853	9.69645	9.86421	9.7375	9.45436	8.83793	9.04486	9.03258	8.6373	9.24321	8.91796	9.94052	8.5978	8.34014	8.2072	8.3519	8.57913	8.14389	8.53535	8.60412	8.68862
E11 Pancreatic Progenitor	1418516_at	Mtf2	11.4636	11.3956	11.3004	11.4031	10.861	10.6786	10.6232	10.5153	10.8911	10.7666	9.90524	9.92338	10.1272	10.0386	11.0606	10.9922	10.6661	10.3186	10.4426	10.3762	10.2426	9.10463	9.49625	9.8331	9.9873	9.81023	10.44	10.4385	10.3088	10.5177	9.6238	10.0703	10.0002	10.2967	10.1183	9.98537	10.5677	9.7473	9.87192	10.1817	10.2495	10.2666	10.0559	9.93247	9.71461	9.9858
E11 Pancreatic Progenitor	1426629_at	Dhx8	9.93382	9.90863	9.77934	9.83093	9.08018	9.08034	9.18361	8.82855	9.3812	8.82572	8.57187	8.44069	8.38259	8.59109	8.99194	9.13451	9.44617	7.7259	7.50466	7.67887	7.03485	8.35304	7.93211	8.32502	7.83608	7.64574	8.71206	8.63238	8.43604	8.97056	8.59811	8.61777	8.36785	9.05577	8.75621	8.57051	9.38811	8.53105	8.54803	8.80026	9.12553	8.90603	8.81084	8.59059	8.49037	8.39137
E11 Pancreatic Progenitor	1452313_at	5930416I19Rik	12.1882	12.1719	12.0469	12.143	11.898	11.7898	11.9283	11.7033	11.6618	11.5427	10.0926	10.5276	10.4917	9.8735	11.4978	11.616	11.583	11.1617	10.7629	10.7574	11.0535	10.7848	10.5515	10.5304	10.5603	10.4156	11.2068	11.0265	11.0484	10.9548	11.4456	11.2103	11.1454	11.1196	11.1872	11.1259	10.6789	10.7451	10.43	10.517	10.7767	10.7924	10.2593	10.5272	10.3765	10.2751
E11 Pancreatic Progenitor	1417716_at	Got2	10.7983	10.7584	10.8803	10.922	10.1995	10.2163	10.1337	10.1789	10.5278	10.4313	8.8588	9.44127	9.48257	9.44067	9.69489	9.43352	9.56737	9.36514	9.16046	9.32803	9.32434	8.78945	7.94819	8.86208	8.95454	8.98248	9.51082	9.5412	9.33331	9.87542	9.05152	9.30308	9.2103	9.09281	9.39533	9.27973	10.2899	9.74447	9.97902	10.0264	10.2422	9.53191	9.50464	10.156	9.48386	9.30007
E11 Pancreatic Progenitor	1423526_at	Arid3b	9.65268	9.58128	9.54706	9.5169	6.88106	6.94533	6.64258	7.05671	6.87729	6.67749	7.71965	7.82654	7.82864	7.56424	7.88145	7.63793	7.68259	7.87952	7.82243	7.56515	7.9618	7.52595	7.53949	7.73415	7.90213	7.5782	8.68436	9.03241	9.09643	9.06865	8.70622	8.47058	8.44992	8.284	7.85719	8.09681	8.90126	8.20234	8.25365	8.78357	9.19819	9.2055	8.90736	8.76322	8.50904	8.74412
E11 Pancreatic Progenitor	1423728_at	Eif3l	12.8309	12.8046	12.7618	12.7634	12.4338	12.4882	12.451	12.6019	12.6337	12.452	11.0826	11.3472	11.3575	11.5254	12.0182	12.1166	12.3996	11.1659	11.3019	10.9552	10.8249	11.6231	11.8767	11.4515	11.0412	10.8992	12.0267	12.0162	11.8703	12.0717	12.0189	11.9276	12.0739	12.1032	12.0041	11.8332	11.0025	11.655	11.6727	11.4692	11.5417	11.9116	11.5843	11.4173	11.4061	11.3389
E11 Pancreatic Progenitor	1416045_a_at	Smarcb1	12.2262	12.131	12.1503	12.2455	11.7645	11.7123	11.8314	11.5792	11.6911	11.3234	9.98092	10.517	10.3834	10.5215	11.3182	11.3515	11.5589	10.7423	10.6224	10.5423	10.1136	11.219	10.8562	10.8696	10.5719	10.5946	11.4308	11.5297	11.3155	11.7483	11.629	11.639	11.5801	11.4608	11.4377	11.3945	11.3599	10.8734	10.7932	10.7442	10.769	11.0367	10.6851	10.6028	10.5904	10.411
E11 Pancreatic Progenitor	1437067_at	Phtf2	9.99499	10.1094	10.0523	10.1741	9.41228	9.43063	9.43147	9.61585	10.0815	9.83171	9.09976	8.74892	8.81497	8.60942	8.66226	8.68998	8.65458	9.12121	8.76725	8.59856	9.01829	8.82186	8.16695	8.1518	8.35763	8.14569	8.95223	8.85289	9.12777	8.98331	8.52561	8.73794	8.25534	8.85636	8.84355	8.5363	7.29645	8.68319	8.23631	8.21209	8.5629	8.7157	8.66669	8.63133	8.47903	8.64933
E11 Pancreatic Progenitor	1448809_at	Cse1l	12.0923	12.1556	12.2461	12.1746	11.6727	11.7656	11.9671	11.7076	11.8416	11.8331	10.6307	10.7996	10.7223	10.471	10.9286	11.0848	11.1236	10.7635	10.8447	11.0036	10.8911	9.66667	9.74973	10.6113	10.4873	10.9711	11.2106	11.0618	11.031	11.1734	11.0596	11.1583	11.1269	10.6066	10.8326	10.8458	8.83535	10.8422	11.036	10.626	10.292	10.1745	10.0224	10.3572	10.4096	10.1057
E11 Pancreatic Progenitor	1417503_at	Rfc2	11.5191	11.4045	11.3909	11.4875	11.2381	11.1404	11.102	10.9694	11.2161	10.924	9.46505	10.0778	9.97404	9.87448	10.1428	10.2977	10.5166	9.74618	9.90202	9.30345	9.44059	10.0688	10.3411	10.2354	10.0832	10.0839	10.2878	10.224	10.2203	10.314	10.9069	10.7043	10.7514	10.2703	10.1493	10.344	11.3159	10.4641	10.314	10.0958	9.89926	10.4465	9.99641	9.82012	10.1139	9.49087
E11 Pancreatic Progenitor	1436382_at	Zbtb12	10.0702	9.97987	9.77193	9.90342	9.33007	9.24861	8.98213	8.885	9.27971	8.72701	6.51755	7.0711	6.84031	6.44597	8.53705	8.36301	8.77033	6.50531	6.81748	6.53686	6.6933	7.18919	6.66197	7.19386	6.82371	7.0817	8.28359	8.7923	8.18457	8.49614	8.303	8.30513	8.39282	7.83996	7.61503	7.82166	7.54347	6.87987	7.43722	7.41188	8.02756	8.10968	7.75643	7.64699	7.24822	7.63816
E11 Pancreatic Progenitor	1449944_a_at	Sec61a2	10.5723	10.5463	10.568	10.5713	9.89108	9.5597	9.60267	9.10824	9.08109	9.23467	9.18976	9.36453	9.44709	9.11082	10.1902	10.0139	9.86979	9.89701	9.65814	10.0878	10.015	9.11403	8.7169	9.38698	9.49607	9.93092	9.60306	9.718	9.72278	9.85186	10.1561	9.94615	10.1368	9.24649	9.18987	9.44988	7.91607	9.95037	9.82467	9.20032	9.20234	8.5379	8.44227	8.86984	8.87559	8.33172
E11 Pancreatic Progenitor	1433973_at	Sephs1	10.4731	10.5153	10.509	10.5619	10.0779	9.96207	10.1945	9.44623	9.83672	9.80315	8.13296	8.19717	8.44963	8.41462	9.64207	9.67496	9.94433	9.47709	9.74803	9.57118	9.88817	8.58896	8.32128	8.57822	8.50357	8.17974	9.7814	9.65328	9.65716	9.82051	9.53849	9.50783	9.59176	9.07716	9.39371	9.31543	9.57166	9.10944	9.31741	8.81465	8.88964	9.36618	8.40265	8.68698	8.46622	8.10611
E11 Pancreatic Progenitor	1449348_at	Mpp6	11.0107	11.0048	10.9571	10.9132	9.8964	10.2485	10.1343	10.298	10.9062	10.7211	9.32445	9.10901	9.10648	9.29958	7.89825	7.82605	8.73448	9.09338	8.41465	8.56601	9.21696	7.67426	8.49761	8.1579	7.386	7.63628	9.21651	9.38978	9.80336	9.35164	9.18121	9.29903	9.28674	9.32653	9.10704	9.05882	10.0707	9.50855	9.54091	9.58091	9.36361	9.88847	9.91675	9.87828	10.0672	9.96533
E11 Pancreatic Progenitor	1434557_at	Hip1	10.8217	11.0235	11.0025	11.0002	9.6425	9.46776	9.75985	9.16281	9.73118	9.47577	9.77463	8.79755	8.69935	9.31994	8.28484	8.36711	8.51799	10.5049	9.66694	9.58146	10.1125	8.58081	8.31493	8.43258	8.42955	7.90036	9.41329	9.48421	9.58913	9.67681	10.6341	10.1949	10.3575	10.4053	10.4949	10.5369	8.9405	8.7957	8.61268	8.88121	9.01426	9.0079	8.68952	8.63465	8.95741	8.61507
E11 Pancreatic Progenitor	1452111_at	Mrps35	11.6252	11.5868	11.5901	11.7071	11.3405	11.3708	11.4374	11.4339	11.6433	11.3057	9.65988	10.2098	9.99859	10.1837	10.6612	10.6455	11.0282	10.3851	10.2898	10.05	10.0785	10.6656	10.8522	10.3842	10.0934	10.0747	10.6453	10.6095	10.8977	10.7245	10.8354	10.6181	10.5464	10.6829	10.6605	10.4669	11.0027	10.8313	10.3745	10.2379	10.6962	10.7327	10.3424	10.317	10.2799	10.1032
E11 Pancreatic Progenitor	1436195_at	BC046404	9.79269	9.76582	9.66434	9.79412	8.73761	8.62486	8.76181	8.78899	8.79639	8.68666	7.83879	7.80826	7.83953	7.90718	8.43046	8.38041	8.86507	8.65715	8.34295	8.47512	7.98111	8.48202	8.28617	8.14013	8.03353	7.64495	8.74943	8.78621	8.78383	8.72203	9.07803	8.8898	9.32195	9.46708	9.41872	9.20339	9.61544	8.20617	8.63883	8.76305	8.89957	9.45238	9.33709	8.3942	8.36517	9.07801
E11 Pancreatic Progenitor	1456090_at	Pdhx	9.39803	9.40892	9.41104	9.41869	9.07296	9.11703	9.02235	9.32112	9.86436	9.53138	7.97911	8.29969	8.43182	8.38434	8.35784	8.50718	8.84576	8.26101	8.24467	7.88126	7.62427	7.72803	8.84931	8.13373	7.49522	7.66331	8.17585	8.34479	8.19144	8.58772	8.5053	8.05053	8.39372	8.32605	8.30617	8.12419	8.13017	8.12847	8.16436	8.07699	8.24977	8.7972	8.3645	8.07606	7.94515	7.97492
E11 Pancreatic Progenitor	1427197_at	Atr	10.5131	10.5214	10.5282	10.423	9.87819	9.83686	9.81903	9.83155	10.3146	9.97562	9.35128	9.53621	9.4314	9.43449	9.39758	9.51769	9.48052	9.77259	10.3394	9.86101	9.64541	10.0015	10.1802	9.80113	9.43024	9.10338	9.14222	9.31108	9.07106	9.33796	9.34969	9.0201	9.12038	9.39325	9.05961	8.8863	7.36309	9.12342	9.02055	9.57969	9.4652	9.84416	9.51785	9.2822	9.1889	8.94887
E11 Pancreatic Progenitor	1455193_at	Zbtb8b	8.17585	8.2915	8.18971	8.3603	7.6874	7.22964	8.08134	6.17435	6.1195	5.82546	6.70722	7.18154	7.43035	7.26761	6.9241	6.86474	7.08955	7.66619	6.50665	6.59798	6.76534	5.97508	5.93675	6.78398	6.68448	6.83125	7.26824	7.4646	6.8399	7.42374	7.60648	6.56554	7.61526	5.89261	6.83902	7.01083	7.21752	5.70369	6.56524	6.06563	5.69712	5.41524	6.47242	6.8297	6.80428	6.81535
E11 Pancreatic Progenitor	1422441_x_at	Cdk4	13.4147	13.2975	13.2791	13.3382	13.0579	12.9235	13.0414	12.7615	12.8621	12.8141	10.7873	11.1484	11.0506	11.1521	12.806	12.8619	13.0167	11.6804	11.4663	11.4157	11.4155	11.3802	11.2491	11.6842	11.4776	11.4636	12.1939	12.3435	12.259	12.4085	12.4766	12.4304	12.4374	12.2774	12.2873	12.2769	10.9628	11.8681	11.9154	11.8116	11.8294	12.0817	11.7446	11.6905	11.707	11.5694
E11 Pancreatic Progenitor	1446235_at	Ap1ar	9.25656	9.20042	9.28439	9.21253	8.41197	8.50215	8.21677	8.66665	8.49663	8.93084	7.61072	7.49279	8.11849	7.47504	8.58861	8.64419	8.52029	7.44344	8.49068	8.41321	8.34175	6.9281	6.53261	8.05705	8.24498	8.02608	8.55155	8.73016	8.15235	8.70394	9.50579	8.57813	8.16225	7.78157	7.67724	8.18907	7.50967	8.30267	7.99808	8.14058	7.72883	7.61113	7.50482	7.94756	7.5901	7.66902
E11 Pancreatic Progenitor	1448465_at	Nipsnap1	11.7572	11.7149	11.7683	11.8932	10.9964	10.8323	10.8067	11.0216	11.3064	10.9303	10.0244	10.6526	10.6542	10.3691	10.6569	10.6638	10.843	9.71723	9.47718	9.84332	9.82061	10.1132	10.5391	10.4576	10.2296	10.3714	11.1469	10.6435	10.7439	10.8592	10.3156	10.6866	10.8704	9.66736	9.58072	10.2346	10.4793	10.6752	11.0809	10.5788	10.763	10.6664	10.4611	10.5428	10.4335	10.3
E11 Pancreatic Progenitor	1417918_at	Mrpl11	11.7988	11.9018	11.9157	11.8308	11.5941	11.5875	11.4102	11.6221	11.8388	11.6211	9.99122	10.3414	10.2747	10.2607	11.0595	11.1176	11.474	10.6498	10.3522	10.3316	10.3816	10.1242	9.94118	10.6201	10.6113	10.4307	10.9854	11.1939	11.0411	11.3267	10.9077	11.1017	11.0496	10.8788	10.9023	10.826	11.0805	10.8629	10.9714	10.4784	10.6198	10.5233	10.57	10.7265	10.5825	10.4595
E11 Pancreatic Progenitor	1436036_at	Whsc1	11.0591	11.0148	10.9301	10.9345	10.6516	10.6532	10.8849	10.2018	10.4884	10.05	9.22756	9.15552	9.11079	9.37377	10.3175	10.2754	10.3949	9.95199	10.0896	9.89383	9.74759	10.4722	10.6409	10.0364	9.75704	10.0537	9.98258	10.1394	9.97154	10.1929	10.0823	9.84094	9.98187	9.91307	9.65509	9.74267	9.9931	9.19565	9.24295	9.69054	9.82455	10.0445	9.63335	9.55971	9.54634	8.90796
E11 Pancreatic Progenitor	1441997_at	Zfp184	10.3556	10.4572	10.2455	10.5144	9.7037	9.46208	9.97333	8.77499	9.06865	8.58119	8.87566	9.17809	8.89166	9.16452	9.13665	9.42502	9.92131	7.73292	8.06171	7.6397	7.8146	7.73486	8.68017	7.95614	8.00001	7.88906	8.48506	8.33523	7.914	8.42782	8.57297	8.74725	8.33209	7.86527	8.12664	7.68442	9.41336	7.63056	9.05275	7.73252	7.87732	7.49601	8.04627	8.07418	7.72273	7.93476
E11 Pancreatic Progenitor	1430656_a_at	Asnsd1	11.3414	11.3952	11.3952	11.3272	10.9583	11.0829	10.9044	11.0058	11.3245	11.2351	8.77764	9.40121	9.37047	9.36912	10.2664	10.3207	10.698	10.4477	10.4339	10.3029	10.3203	9.8406	9.96769	10.05	9.92465	9.80282	10.6334	10.4553	10.534	10.5011	10.3374	10.6235	10.5901	10.4142	10.4783	10.3765	10.6147	10.5666	10.5689	10.3358	10.3483	10.2204	10.2559	10.4862	10.4545	10.0488
E11 Pancreatic Progenitor	1456507_at	Zfp454	9.74028	9.8355	9.71234	9.61596	9.24183	9.02315	9.25477	8.59538	8.97612	8.77013	7.74179	8.0819	7.34373	7.46899	8.42057	8.55673	9.11501	8.15015	8.50845	8.05954	8.04198	8.95236	9.47364	8.30565	8.35951	8.85754	8.33043	8.43101	8.3457	8.57122	8.7411	8.61185	8.29832	8.11567	7.9931	8.13908	7.48814	7.17332	7.68809	6.93058	7.14379	6.93977	7.78502	7.63881	7.12953	7.84601
E11 Pancreatic Progenitor	1428144_at	Lrwd1	10.2054	10.2454	10.189	10.2381	10.1208	10.0051	10.1097	10.3742	10.2253	9.93809	8.53008	8.70841	8.5318	8.47041	9.51399	9.54378	9.5599	8.29414	8.79124	8.46717	8.37203	8.86536	9.19206	8.62163	8.90573	8.94494	9.30477	9.27217	9.35226	9.26814	9.4334	8.99545	9.28812	9.14273	9.23713	9.17236	9.76978	8.99388	8.83182	8.73694	8.78313	8.44208	8.80479	8.81699	8.62307	8.81964
E11 Pancreatic Progenitor	1448835_at	E2f6	10.8499	10.8625	10.8065	10.7003	9.82635	9.70646	9.96405	9.7904	10.2343	9.68995	8.50499	8.54665	8.52399	8.82255	9.34789	9.44721	9.58038	9.84406	9.70703	9.3302	9.35449	9.88355	10.5387	9.8503	9.64681	9.00575	9.43795	9.7146	9.42879	9.69349	9.64606	9.44762	9.49828	9.60911	9.35321	9.26693	10.5664	9.26722	9.58721	9.55594	9.77548	10.0236	10.184	10.1138	10.1913	10.2375
E11 Pancreatic Progenitor	1436816_at	Nup133	12.5052	12.4606	12.404	12.6027	12.0123	11.8923	12.0655	11.7863	12.1368	11.8474	10.6066	10.8458	10.71	10.6786	10.9908	10.9821	11.2602	11.1703	11.3283	11.1081	10.9179	11.0341	10.9487	10.8279	10.7002	10.7193	10.9177	11.2348	11.1472	11.1556	11.4995	11.2477	12.189	11.1939	11.1508	11.2382	11.1808	10.7458	10.6667	10.7398	10.7811	10.8687	10.6587	10.6275	10.6876	10.2087
E11 Pancreatic Progenitor	1424170_at	Phf5a	12.4084	12.5105	12.4318	12.4092	12.0707	12.1017	12.0632	12.0708	12.3011	12.2799	10.5573	10.6866	10.8576	10.9058	11.582	11.5568	12.0176	10.4758	10.8653	10.5001	10.7143	11.0394	11.0144	11.2269	10.9499	10.8529	11.514	11.6938	11.687	11.793	11.7837	11.6811	11.6708	11.5199	11.6458	11.561	12.0027	11.689	11.6608	11.2764	11.4757	11.2997	11.1386	11.2528	11.1805	11.0638
E11 Pancreatic Progenitor	1452226_at	Rcc2	12.3935	12.2612	11.9899	12.1185	11.1171	10.98	10.9968	11.2439	11.2521	11.0732	9.3823	9.3743	9.27784	9.53399	9.94425	9.92485	10.1658	8.8568	8.55508	8.79237	8.86829	7.99199	8.21759	8.71141	8.57439	7.8269	9.13674	9.24022	8.90718	9.21073	9.31697	9.29317	9.43978	9.1605	9.4099	9.40909	10.4921	9.04656	8.67625	8.15435	8.47785	8.51135	8.49876	8.32873	8.49515	7.99092
E11 Pancreatic Progenitor	1416782_s_at	Praf2	11.4016	11.3908	11.3774	11.2641	10.5175	10.4533	10.3215	10.6876	10.917	10.6773	10.0665	10.4191	10.4816	10.3794	9.80819	9.87881	10.3343	10.2696	9.41141	9.36845	9.7996	10.2462	9.97098	9.7578	9.77437	9.1312	9.96757	9.94986	9.98156	10.1072	11.172	10.6798	10.8996	10.9065	10.9558	11.1868	8.88921	9.29447	9.35209	8.83245	8.65821	9.35889	9.86787	9.47459	9.52489	9.25582
E11 Pancreatic Progenitor	1434795_at	Disp1	9.7104	9.68798	9.61333	9.73313	9.17621	8.99853	9.12709	8.72205	8.94243	8.59575	8.16145	8.54486	8.70344	8.51944	9.05662	8.94786	9.2009	8.11532	7.89291	8.0963	8.02292	9.10044	8.51935	8.38745	8.34072	7.62982	8.86535	9.14642	8.74814	9.05042	10.0986	8.6416	8.86443	8.97658	9.21996	9.30484	8.24771	8.25054	7.92753	7.46747	7.80888	7.9869	8.33391	8.16482	7.9133	7.90645
E11 Pancreatic Progenitor	1452086_at	Trmt5	10.0632	10.066	9.97662	9.98542	9.44244	9.50922	9.41281	9.80257	9.88757	9.67696	7.51809	7.85525	7.57821	7.82496	8.63873	8.81057	9.25814	8.47279	9.01337	8.59979	8.57898	9.35026	9.45303	8.9689	8.56397	8.50691	8.89565	8.8912	8.68825	8.89469	8.76679	8.70681	9.90444	8.66951	8.5536	8.49807	9.92898	8.51226	9.09368	8.51218	8.90223	9.14732	8.85804	8.89567	8.77651	8.79985
E11 Pancreatic Progenitor	1427357_at	Cda	11.7883	11.5102	11.4784	11.5028	9.922	9.4884	9.78617	9.89594	9.99239	9.68603	8.01421	8.17394	7.96963	7.8695	9.58986	9.45934	9.71303	8.25713	8.17444	7.94511	7.86844	7.65719	8.47217	7.89495	7.84801	7.96221	9.49057	10.3289	10.1146	10.3958	9.9356	10.1501	10.3656	9.95492	9.69158	9.51716	10.6945	8.5269	9.23823	9.79413	10.2621	9.78275	9.16469	9.55609	9.69412	9.41997
E11 Pancreatic Progenitor	1460205_at	Dcakd	11.1704	11.1732	11.1715	11.32	10.4119	10.4705	10.4994	10.6238	10.8979	10.5334	8.53705	8.84252	8.54036	8.63044	10.0049	10.2232	10.4282	8.34728	7.86968	7.76199	7.78561	8.81742	8.20007	8.02779	7.62358	7.35733	10.0556	10.0905	10.0462	10.4605	10	9.90113	10.0194	9.62905	9.41856	9.4597	10.0989	8.98296	9.36331	9.09407	9.04182	9.52515	9.02764	8.74341	8.53856	8.49182
E11 Pancreatic Progenitor	1427213_at	Pfkfb1	8.57542	8.43743	8.56912	8.60736	7.70109	7.79962	7.9146	7.94071	8.35517	7.89475	6.48773	7.09716	7.2945	6.98148	7.3964	7.49039	7.08809	8.02828	8.32447	8.24103	7.18267	6.64006	6.54408	7.16358	6.32547	6.83718	7.59292	7.67935	7.20037	7.8286	7.43292	8.24453	7.43278	7.43703	7.32857	7.64243	6.36586	6.57538	6.12289	6.93126	6.90372	7.07356	6.53592	7.01629	6.42651	6.50791
E11 Pancreatic Progenitor	1415704_a_at	Cdv3	13.1496	13.1583	13.0926	13.1373	12.6943	12.686	12.697	12.8725	12.985	12.9907	12.621	12.3667	12.588	12.5074	11.7787	11.7752	12.0264	12.153	12.109	12.0688	12.0058	11.1398	11.5225	11.4634	11.1941	11.4853	12.1778	12.1179	12.267	12.2556	12.3752	12.2986	12.1053	12.2286	12.3623	12.1775	10.0834	12.021	11.8922	11.625	11.558	11.6493	11.4881	11.7963	11.6241	11.284
E11 Pancreatic Progenitor	1416915_at	Msh6	12.435	12.3102	12.3831	12.4923	12.1464	12.1264	12.073	11.8336	12.2108	11.9211	11.1004	11.0053	10.824	10.8547	10.8764	11.0421	11.173	11.7909	11.8984	11.7923	11.6123	11.6585	11.0003	11.1907	11.1128	11.098	10.7556	10.8849	11.0405	10.8412	11.1181	11.0864	11.4339	10.7118	10.5759	10.7	11.0359	10.5189	10.5885	11.044	10.9976	10.9237	11.0782	11.1215	10.8313	10.9115
E11 Pancreatic Progenitor	1416559_at	Rrp8	9.2807	9.41207	9.3614	9.3631	8.72379	8.7411	9.02873	8.90542	9.04449	9.25023	7.95866	8.15739	8.48492	8.56276	8.02214	8.20026	8.60837	8.34143	8.93245	8.2381	8.68857	7.27226	7.66422	8.41307	8.1491	8.14144	8.61543	8.44114	7.62933	8.57772	7.38582	8.48998	8.62487	8.7814	8.55426	7.83715	6.71308	7.88939	8.50154	7.59522	8.22935	8.22789	7.9213	7.72301	7.83388	6.94904
E11 Pancreatic Progenitor	1433982_at	Usp28	8.72561	8.84705	8.77367	8.75981	8.44574	8.45439	8.52067	8.65455	8.37158	8.52153	8.31246	7.52609	7.93141	7.47504	8.19223	8.12078	8.24722	7.205	7.45318	7.24479	7.33579	7.04678	7.27308	7.45264	7.51792	6.80885	7.9945	8.21758	7.74569	8.04492	7.84406	7.69368	7.6535	7.30366	7.74574	7.63668	7.33024	7.25939	7.04303	6.73786	6.89969	7.28805	6.75954	6.6709	7.16366	6.03174
E11 Pancreatic Progenitor	1451058_at	Mcts2	11.8597	11.7843	11.7705	11.8448	11.1009	11.0197	10.9578	10.3717	10.9946	10.5321	10.0107	10.1247	10.0022	10.268	11.4503	11.604	11.8643	10.7525	10.6098	10.4332	10.2689	10.1886	10.4767	10.0268	9.67858	9.89326	11.3891	11.5236	11.422	11.6065	11.1448	11.1617	11.4616	11.0859	11.1566	10.9618	11.2591	10.5745	10.4771	10.2843	10.624	10.4496	10.3475	10.439	10.0559	9.90362
E11 Pancreatic Progenitor	1418959_at	Tmprss5	9.28151	9.0104	9.03369	9.19991	6.93281	7.10016	6.99298	6.76379	6.43023	6.01829	6.10074	6.04273	5.79969	6.47381	6.63574	6.35816	6.31983	7.18682	8.31116	7.35184	7.74553	7.386	6.77881	6.44809	6.63839	7.28059	6.93926	6.88782	7.08909	7.05591	7.96479	6.77811	7.3603	8.57799	8.20021	7.92675	6.96039	6.46457	6.38028	6.64626	6.50402	6.45502	6.75496	6.63716	6.86931	6.05169
E11 Pancreatic Progenitor	1460262_a_at	1700037H04Rik	10.3888	10.3149	10.2176	10.3461	9.85433	9.72601	9.80786	10.0533	10.0612	9.59456	8.74305	8.9492	9.22806	9.07035	9.56884	9.45941	9.72503	8.73256	8.81166	8.18536	8.74326	9.04151	9.01335	8.97059	8.45837	8.46269	9.4539	9.66456	9.48919	9.61803	9.59377	9.8162	9.74529	9.47566	9.27907	9.16041	9.4488	8.50965	8.77563	8.38169	8.27225	9.07475	8.71125	8.62145	8.76753	8.64217
E11 Pancreatic Progenitor	1416181_at	Mesdc2	12.6184	12.5544	12.6594	12.5295	11.9022	11.973	12.0329	12.3117	12.1883	12.3097	10.8268	10.8393	10.744	10.6607	11.4311	11.5548	11.8391	11.5105	11.1708	10.94	11.0651	11.5888	11.6892	11.8907	11.7071	11.768	12.0929	12.2093	12.1547	12.1954	11.7662	12.0268	12.0635	11.7249	11.6892	11.7384	10.3789	11.5914	11.7431	11.2331	11.3387	11.4385	11.2496	11.3074	11.1908	11.3035
E11 Pancreatic Progenitor	1422439_a_at	Cdk4	13.0016	12.9533	12.9222	12.9278	12.7081	12.61	12.6854	12.5666	12.6367	12.5109	10.3601	10.5927	10.6085	10.6672	12.4975	12.5853	12.7083	11.2594	11.0704	11.0038	11.0019	10.8973	10.8719	11.2805	10.9885	11.0664	11.9144	12.0205	11.9315	12.068	12.1119	11.9045	11.9971	11.964	11.966	11.95	11.8726	11.5213	11.5846	11.386	11.4953	11.7335	11.3639	11.2549	11.2807	11.2197
E11 Pancreatic Progenitor	1426698_a_at	Hnrnpm	12.4793	12.4228	12.4741	12.4536	12.2767	12.1953	12.7196	12.3207	11.7879	12.4099	11.3408	11.4635	11.2957	10.9597	11.685	11.7695	11.8966	11.5286	11.5836	11.513	11.7418	10.2435	10.3601	10.9551	10.8473	10.7693	11.6187	11.2293	11.3987	11.5037	11.6038	11.6306	11.5131	11.1454	11.5671	11.5607	11.4547	11.1326	11.1114	10.7766	10.7182	10.6949	10.4614	10.8174	10.6671	10.5087
E11 Pancreatic Progenitor	1456159_at	Setd5	7.71546	7.80101	7.82957	7.85824	7.15082	6.51674	6.92052	6.52732	6.29145	7.29628	6.46317	6.43661	6.49763	5.26381	7.45869	6.72743	6.80623	5.27432	5.66034	6.21819	6.0806	5.36568	6.19476	6.79401	7.12772	6.23556	6.91941	7.58296	7.69104	6.84458	7.24765	6.94458	7.14737	6.2192	6.23336	6.79414	7.03597	7.3362	7.13524	6.70308	6.20532	5.82203	5.44768	5.84329	5.80664	6.89025
E11 Pancreatic Progenitor	1418260_at	Hunk	9.5777	9.70219	9.55257	9.65891	9.57501	9.13601	9.84086	7.65784	7.83978	7.29828	8.04612	7.79959	7.98623	8.06564	7.80921	7.64511	8.34043	8.72166	9.36282	9.03476	8.92998	7.14318	7.2035	6.97767	6.47446	6.47327	8.2594	8.9927	8.07329	8.54501	8.23327	8.41309	8.36444	8.10844	8.16516	8.0914	7.29264	5.94374	6.96319	7.1829	6.713	7.16734	6.42992	6.85348	7.17192	6.44096
E11 Pancreatic Progenitor	1448124_at	Gusb	11.8538	11.7725	11.7174	11.7594	11.2519	11.4251	11.2918	11.3826	11.7265	11.5873	10.2747	10.0396	10.0282	10.6229	9.91455	9.9607	10.4145	11.128	11.0621	10.6556	10.5216	10.3389	10.866	10.497	10.2072	9.52288	10.5678	10.6889	10.6222	10.7792	11.1963	11.0038	10.6894	11.1131	10.8569	10.9274	10.4919	10.5742	10.3669	10.4969	10.4972	11.148	11.5347	11.2357	11.204	11.2714
E11 Pancreatic Progenitor	1420984_at	Pctp	10.2363	10.2186	9.97718	9.92549	8.98136	9.01736	8.79473	9.16235	9.45604	8.94189	6.40862	5.81124	6.12892	6.6315	6.90893	7.08355	7.40795	7.56725	7.2179	7.26654	7.36009	8.03979	9.1592	7.80969	6.99589	7.04183	7.45405	7.98349	7.82782	7.70301	7.24437	6.49751	6.67463	6.90175	6.58639	6.81173	8.54091	7.18781	7.65847	7.49847	7.73474	8.17708	8.2585	7.49887	7.45186	7.79964
E11 Pancreatic Progenitor	1449115_at	Mtf2	9.30635	9.48262	9.58319	9.53572	8.65118	8.37347	8.79653	8.49431	9.19895	8.78883	7.66895	7.62176	7.68668	7.39947	8.58766	8.62929	8.56147	7.1117	7.3922	7.45592	7.37504	6.28976	7.25809	7.28879	6.24283	7.05022	8.21692	7.93359	7.85509	8.06107	7.84836	7.93305	8.43304	7.45178	7.96792	7.48588	8.44841	7.7224	7.30327	6.65553	6.7517	6.52516	6.27207	6.99785	6.42034	6.46239
E11 Pancreatic Progenitor	1425934_a_at	B4galt4	8.38237	8.48309	8.29975	8.41322	8.38158	7.87492	8.41228	6.70978	7.21896	7.32111	7.00905	7.50734	7.71554	7.57946	7.15933	7.42028	7.49145	7.48855	7.27072	7.35242	7.41825	6.38434	6.30222	6.93387	6.40416	6.94683	7.40251	7.25583	7.26321	7.40085	7.29742	7.05618	7.84426	7.26307	7.86799	7.56477	7.31801	7.0399	7.03736	6.58469	6.69974	6.84042	6.88024	7.37631	7.05199	7.22095
E11 Pancreatic Progenitor	1437480_at	Fam33a	10.2883	10.4024	10.4771	10.2855	9.92109	9.71682	10.175	9.12142	9.4394	9.35202	8.20652	8.30894	7.58985	7.53866	9.44874	9.59539	9.6996	9.21742	9.30706	9.5304	9.25251	9.10731	8.74854	8.80843	8.82195	8.4013	9.40141	9.23817	9.03462	9.35257	8.88045	9.79316	9.32325	8.91026	9.07787	9.40973	7.73194	8.36129	8.82322	8.62119	8.62204	8.61231	8.22469	8.36804	8.08804	8.31243
E11 Pancreatic Progenitor	1426539_at	Usp11	10.5972	10.4805	10.5196	10.3881	9.17315	9.16286	9.68664	7.98823	8.67488	8.12873	8.29659	8.72744	8.76639	8.42741	9.27644	9.53826	9.56333	9.05461	9.2871	9.12238	8.83503	9.87218	9.6249	10.3349	10.0726	10.1333	9.94679	9.87696	9.92501	10.1057	9.32176	9.96774	9.79498	8.42179	8.44145	8.74562	9.18151	8.76109	8.95561	8.81997	8.71582	8.85553	8.98149	8.73486	8.76018	8.64065
E11 Pancreatic Progenitor	1448324_at	Rnps1	11.83	11.9234	11.9232	11.9356	11.4602	11.442	11.6281	11.7911	11.6426	11.7096	10.1704	10.3119	10.6114	10.2572	11.0528	11.045	11.2549	10.3509	10.3319	10.338	10.1198	9.47264	10.3263	10.2501	10.5659	10.196	11.2968	11.222	10.973	11.2976	11.238	11.2353	11.2655	10.9773	11.2921	11.0231	11.3548	10.8144	10.8464	10.3535	10.0541	10.1501	9.88451	10.0909	10.0661	9.67974
E11 Pancreatic Progenitor	1416177_at	Rbmxrt	12.8753	12.943	12.9591	13.1218	12.574	12.4266	12.7607	12.6336	12.3652	12.5713	10.7239	10.9219	11.0084	10.8687	11.8197	11.9521	12.1361	10.7974	10.9736	10.9317	10.4109	9.82588	9.9467	10.4036	10.2688	9.88876	11.9069	11.4803	11.4379	11.502	11.6617	11.8267	11.6497	11.5067	11.8791	11.6863	11.658	10.9174	10.8058	10.1028	9.97829	9.9964	9.92847	9.8857	9.71717	9.50511
E11 Pancreatic Progenitor	1434963_at	Supt3h	10.1006	10.0894	10.1101	10.1912	9.93786	9.81476	9.8704	9.79887	10.1749	9.51436	9.44816	9.53448	9.888	9.69349	8.75788	8.6594	9.03612	8.47321	8.30866	7.80488	7.95345	9.26887	9.91853	9.34	9.02906	8.94589	8.89173	8.68719	8.58855	8.91027	8.76111	8.60438	9.21072	8.47469	8.4444	8.51296	9.84491	8.06135	8.45757	8.74915	8.76235	8.94265	8.82337	8.58142	8.35344	9.01722
E11 Pancreatic Progenitor	1452340_at	Zfp518b	10.7392	10.676	10.5437	10.5784	10.1375	10.0625	10.2191	9.27065	9.57093	9.36021	7.43344	7.4347	7.48855	6.99229	10.2138	10.2967	10.3433	9.2841	9.08526	9.07424	9.02209	8.39235	7.38077	8.34719	7.83917	8.16404	9.33399	9.39679	9.10955	9.27699	8.8111	9.68966	9.28725	8.9208	9.35085	8.84967	6.33248	7.71375	7.95259	8.17232	8.81226	8.48611	8.86762	9.04737	9.18243	8.86145
E11 Pancreatic Progenitor	1429671_at	Scand3	9.31059	9.35719	9.1961	9.25045	7.59512	7.34429	7.88142	7.21433	7.50046	7.04297	7.957	8.05326	8.54353	8.06057	7.88517	7.70821	7.95723	8.57976	8.57265	8.07205	8.36652	8.93676	10.0154	9.02514	8.79686	8.85372	8.20788	7.89732	7.48562	7.94072	8.55555	8.01369	7.59092	8.99508	8.6202	7.81373	7.96654	8.16332	8.07509	7.64791	7.94086	8.57948	8.03042	8.30194	8.04395	7.25436
E11 Pancreatic Progenitor	1429149_at	Gins3	9.79443	9.81304	9.74405	9.78289	9.75894	9.73023	9.55552	9.57673	9.75096	9.32601	7.48931	7.81024	7.66618	7.34855	8.33316	8.20741	8.60846	8.83053	8.33776	8.76665	9.0207	9.09042	9.71748	8.74499	8.19227	8.78131	8.23716	8.12581	8.75379	8.3401	8.72057	9.07675	8.35276	8.6497	8.38555	9.02471	8.33896	8.53138	8.72691	8.47333	8.19575	9.31924	8.76043	8.67834	8.84233	8.58692
E11 Pancreatic Progenitor	1441400_at	1810029B16Rik	8.0548	8.05795	8.15294	8.16424	7.53152	7.40958	7.55625	7.72417	7.28608	8.3032	8.0597	7.45927	7.91003	7.46785	7.28237	6.86306	6.96552	6.53356	7.07711	7.19388	6.6667	6.53362	5.5201	7.00238	6.84426	7.78719	6.72211	7.65355	6.39938	6.91221	6.70734	6.98771	5.87716	6.61951	6.50525	6.55694	6.74358	7.03887	6.73177	6.69743	6.69473	5.89647	5.92446	6.65903	6.26192	5.66178
E11 Pancreatic Progenitor	1431932_s_at	Trim44	8.43584	8.28752	8.45417	8.31408	7.76659	7.93945	7.96398	7.88837	8.17947	7.75169	7.57324	8.18442	7.51022	7.26567	7.63993	7.25214	7.83136	7.02117	6.35182	6.80699	6.71473	5.69602	6.1086	6.06132	6.40114	6.36011	6.94661	7.48851	7.42428	6.88654	7.18995	6.64898	6.50403	6.49388	6.52834	6.67577	6.14303	6.14327	6.34908	7.27534	6.71549	6.94149	7.22842	7.05712	7.21265	7.80968
E11 Pancreatic Progenitor	1434156_at	Rab11fip4	10.6515	10.4935	10.3438	10.5235	9.61306	9.72242	10.2696	9.24763	8.87371	8.66564	9.61202	9.58955	9.55915	9.8098	9.2145	9.25043	9.5492	8.5954	8.3798	8.56235	8.27258	8.93611	7.92755	8.6755	8.78149	8.36732	8.58632	9.1117	8.65737	8.95546	8.18238	7.71962	8.51354	7.93448	7.81602	7.62072	8.71994	7.49907	7.78627	7.7943	8.06738	7.43169	8.64798	8.29012	7.90575	7.96869
E11 Pancreatic Progenitor	1429752_x_at	Clip4	8.87659	8.67672	8.76781	8.67826	8.34065	8.17946	8.04192	7.56057	8.11924	8.03207	5.87388	5.89131	6.09163	6.18522	7.9315	8.14567	8.08743	6.93693	7.20006	6.78121	6.60426	7.55651	7.64858	7.04631	6.68107	7.23347	7.72356	7.58746	7.92215	7.69508	7.75754	7.52715	7.10986	7.39273	7.39643	7.30497	8.05163	6.78207	6.93829	7.91986	7.70537	7.22749	7.25816	6.56255	7.21918	7.05907
E11 Pancreatic Progenitor	1453446_at	6430411K18Rik	8.51951	8.39323	8.66291	8.42887	7.26377	6.86787	7.17972	6.46333	7.00391	6.45409	5.01495	4.61956	4.99309	5.7034	6.52273	6.27932	5.95896	6.6305	5.91843	6.59459	6.73216	6.69259	6.82855	5.84063	6.00009	5.82226	7.28265	6.87738	6.69426	7.9415	8.60669	6.62319	7.74897	7.63042	7.6985	7.9973	6.07451	5.12337	6.38084	7.6308	7.78707	7.03678	6.86676	7.24968	7.23036	6.25865
E11 Pancreatic Progenitor	1443750_s_at	Rpp40	9.83688	9.68227	9.72467	9.63659	9.42836	9.43444	9.22988	9.49607	9.80508	9.33053	8.45491	8.2647	8.40164	8.39427	7.98822	7.94583	8.25738	8.13843	8.30359	7.87964	8.36946	8.58038	8.46246	8.4535	8.41973	7.50527	8.29843	8.33902	8.04501	8.47475	8.28589	8.85375	7.99227	8.37484	8.19841	7.96159	9.57267	8.0191	8.30901	7.99038	8.56241	8.59477	8.3318	8.41611	8.31006	8.52804
E11 Pancreatic Progenitor	1438228_at	4930452B06Rik	8.6671	8.83107	8.79757	8.54402	8.21506	7.95055	8.63295	7.6185	7.55617	7.74114	7.55249	7.13085	7.07983	6.92981	6.8452	7.14709	7.3766	6.91043	6.67889	5.78159	6.69441	5.97169	6.83463	6.90689	6.67487	6.34768	6.84843	6.81197	6.46593	6.70888	9.10131	7.17556	7.4849	6.62298	6.96242	7.08585	5.81972	5.50193	5.40692	5.38028	5.87492	5.89351	5.33664	6.27016	6.1369	5.38161
E11 Pancreatic Progenitor	1424895_at	Gpsm2	10.9088	10.8621	10.7231	10.7568	10.3861	10.4623	10.5321	10.7658	11.0417	10.6739	8.09143	7.91022	7.36498	7.09674	9.27092	9.50743	9.76444	9.23589	8.69582	9.07343	8.56451	8.48456	9.8994	9.17671	8.85215	8.19377	9.01666	8.92101	8.92389	8.89908	9.75892	9.18287	9.54553	9.82925	9.67378	9.56721	8.06388	8.63904	8.24736	8.00526	8.12097	9.16703	7.9268	7.73073	7.69973	7.84954
E11 Pancreatic Progenitor	1448641_at	Mbtd1	11.6428	11.4911	11.643	11.6333	10.8638	10.8636	10.6743	10.3644	10.6463	10.6102	11.068	10.9903	11.2271	10.9745	11.49	11.4792	11.3598	10.6947	10.3176	10.4138	10.6136	9.65789	10.3905	10.6153	10.7526	10.4122	10.4247	10.8256	10.6846	10.5419	9.83314	10.4173	10.2318	10.3899	10.2108	10.3232	10.6395	10.2369	9.75986	10.2214	10.4173	10.1775	10.08	9.83674	10.1224	10.1604
E11 Pancreatic Progenitor	1451127_at	Vopp1	9.12139	9.19049	9.18226	9.1333	8.05521	7.83217	8.44754	7.21822	7.78548	8.05133	7.41042	7.78371	7.22119	6.93987	8.63341	8.4721	8.94035	8.57667	8.57883	8.02177	8.10794	7.10847	7.04889	8.21975	8.52523	10.0431	8.27303	8.06581	8.24605	7.96814	8.3447	8.28867	8.19188	8.00078	8.42806	8.28691	8.06318	7.75258	8.20852	7.22126	6.83558	6.544	7.26311	8.27407	7.41976	8.43129
E11 Pancreatic Progenitor	1419076_a_at	Brca2	10.4478	10.4845	10.2865	10.203	10.1436	10.0083	10.0273	10.0656	10.374	9.89615	7.96232	8.40367	8.33257	7.87212	8.42202	8.19152	8.87958	8.4627	8.42296	8.49441	8.57659	7.11748	7.84318	7.87447	8.48283	6.88405	8.38466	8.54617	8.65244	8.0116	8.86705	9.46055	9.18999	8.82649	8.63441	8.80802	7.13627	8.00869	7.70886	7.54128	7.53071	7.89455	7.39925	7.32763	7.14708	6.6201
E11 Pancreatic Progenitor	1450725_s_at	Car14	9.45464	9.41253	9.48489	9.6162	7.79599	7.90082	7.1036	8.4217	8.55205	8.42964	7.45017	7.26518	7.56277	7.29633	7.43544	7.43104	7.45869	7.82605	7.48047	7.52561	7.47239	7.32546	7.01925	7.65398	7.48658	7.36842	7.45943	7.50263	7.42877	7.74455	7.77257	7.29216	7.25752	7.56071	7.50038	7.54438	8.16374	7.40923	7.60283	7.43534	7.9838	7.89811	7.5534	7.29636	7.47817	7.07933
E11 Pancreatic Progenitor	1439284_at	Epb4.1l5	10.0981	10.0026	10.0332	9.82976	9.01107	8.84413	8.90224	7.9714	7.71256	8.01565	9.60695	8.97866	9.46387	8.91676	8.48658	8.54526	8.27709	8.56159	8.73453	8.58082	8.82091	8.91616	9.09072	9.13808	9.11658	9.20972	8.49406	8.84083	8.13223	8.27798	7.5359	8.19739	7.42627	7.33446	7.46241	7.71386	6.68001	7.16391	7.48388	7.63599	7.83493	7.84736	8.55433	8.56289	8.79244	8.46938
E11 Pancreatic Progenitor	1449261_at	Pbx2	10.6126	10.5338	10.6504	10.6153	9.65685	9.47327	9.28036	8.45757	8.86819	8.70638	8.69108	8.69531	8.27985	8.34181	9.98371	9.72931	9.43061	10.2272	10.3387	10.2658	10.2831	9.27565	8.97926	9.65627	9.83395	9.79728	9.77689	10.411	10.2767	10.0597	9.87498	10.3781	10.0713	9.34339	9.31898	9.36322	9.98109	9.63351	9.84691	9.83675	9.77124	9.54861	9.47625	9.8751	9.69864	9.03828
E11 Pancreatic Progenitor	1416147_at	Hspa4	12.142	12.248	12.136	12.1156	11.8176	11.7075	11.2441	10.6614	11.4645	11.3048	10.754	10.7202	10.6698	10.8245	11.4971	11.4784	11.5875	11.4962	11.5109	11.4215	11.2576	11.2479	10.6946	11.2828	11.404	11.3202	11.348	11.5055	11.3519	11.5515	10.9755	11.2383	11.1438	10.2519	10.3278	10.3919	8.16809	10.0119	10.4792	10.9727	10.7583	11.026	11.0202	11.3498	11.1919	10.8003
E11 Pancreatic Progenitor	1428498_at	Rnf219	10.4178	10.4405	10.2511	10.5171	9.59639	9.37798	9.79876	8.98088	9.169	9.24852	7.99675	7.94017	7.75923	7.25677	8.95831	8.90957	9.22894	9.49448	8.96382	9.41019	8.89317	8.38975	8.52854	8.45765	8.74096	8.07249	9.03576	9.14885	9.01289	8.19036	11.2658	9.70432	8.94966	8.43185	8.62245	8.38079	9.78108	9.05802	9.40892	8.52417	8.37549	8.09815	8.67297	8.56733	8.25236	8.29512
E11 Pancreatic Progenitor	1448536_at	Lsm3	11.5934	11.7044	11.7837	11.6576	11.5335	11.4444	11.5564	11.3836	11.9033	11.6803	9.25201	9.36541	9.05202	9.11201	10.1869	10.2311	10.5828	9.40762	9.29182	9.55424	8.94956	9.28795	8.44092	9.07491	8.94474	8.84801	10.4582	10.5145	10.6504	10.3552	10.4851	10.2127	10.4407	10.568	10.7335	10.703	10.2462	10.0783	10.1631	9.06508	8.75195	8.7332	8.71742	8.70348	8.6514	8.52504
E11 Pancreatic Progenitor	1418226_at	Orc2l	8.92171	8.76609	8.83925	8.77822	8.08157	8.25003	8.23643	8.58825	9.07009	8.87325	7.28228	7.47204	7.50571	7.43391	7.94415	7.8232	8.13274	7.74611	8.30815	8.23287	7.92378	6.70827	7.23047	7.55424	7.04962	6.2351	7.86027	7.64684	7.70617	7.90926	7.62142	7.90578	7.86842	7.99026	7.6652	7.39809	8.57057	7.78834	8.26282	7.64289	7.62529	7.46349	7.29959	7.09713	7.46211	7.12454
E11 Pancreatic Progenitor	1435766_at	Pphln1	10.1903	10.2454	10.1892	10.3381	9.56001	9.67937	9.65021	10.0722	10.2552	10.2798	8.64393	8.79006	8.62882	8.58786	9.4885	9.42602	9.70216	9.34447	9.15967	9.16041	9.2052	9.51724	9.74242	9.35269	9.26184	9.70811	9.22676	8.98661	8.82133	9.05347	8.65164	8.9792	9.04077	8.8674	9.13638	9.0476	10.3626	9.59302	9.27709	8.68079	8.76392	8.87037	8.5099	8.88646	8.21641	8.23801
E11 Pancreatic Progenitor	1449055_x_at	Pcbp4	11.0803	10.8207	10.7687	10.9316	10.0911	9.77049	9.9801	8.80541	8.69452	8.2727	8.4339	8.64221	8.85478	8.58224	10.96	10.8547	10.8586	8.02338	8.15142	8.21432	8.10665	8.28857	7.57686	8.4781	8.02596	8.03416	9.84576	10.3106	9.95671	10.3335	9.31005	9.52675	9.6187	9.366	9.17879	9.12572	9.9326	7.59005	8.24848	7.86066	7.85257	7.7652	7.84201	8.13195	7.88265	7.83701
E11 Pancreatic Progenitor	1429326_at	Cenpl	9.06769	8.99668	8.98522	9.14573	8.87345	8.78239	8.95161	8.66787	9.21487	9.00917	7.92003	7.2922	7.30633	7.41117	7.33725	7.33032	7.89808	7.9026	7.62417	7.56303	7.60076	5.05658	6.22896	5.27473	6.70015	6.74808	7.19161	7.64232	6.81906	7.26379	7.28794	7.60154	7.54693	7.54571	7.58627	7.79343	8.12321	7.08359	6.68637	6.50775	5.79681	6.7751	6.22742	5.55155	6.24671	6.11249
E11 Pancreatic Progenitor	1418057_at	Tiam1	11.0925	10.8991	10.7307	10.8666	10.4925	10.7001	10.4278	10.3891	10.616	10.7282	8.90054	8.14667	8.21601	7.70446	8.74269	9.05667	9.31129	9.60253	9.43185	9.35447	9.36866	7.41867	7.38176	9.03931	8.83694	8.03699	8.26991	8.75333	8.80345	8.45841	8.24237	8.87196	8.78876	8.61044	8.73898	8.47548	7.44489	7.81756	7.13024	7.43424	6.928	7.8853	8.99512	9.1686	9.43542	8.88089
E11 Pancreatic Progenitor	1452047_at	Cacybp	12.897	12.9211	13.0532	12.8563	12.3103	12.3008	12.2036	12.2382	12.5044	12.4816	11.2196	11.4194	11.2955	11.3635	12.0043	12.0885	12.2479	11.8543	11.9581	11.8683	11.6664	11.7409	11.8619	11.8626	11.6076	11.8816	12.3021	12.0393	12.2225	12.173	11.8104	12.0406	11.9486	11.5548	11.6882	11.497	9.33047	11.879	12.0072	11.2853	11.1496	11.0779	11.412	11.3058	11.1251	11.0504
E11 Pancreatic Progenitor	1450777_at	Xrn2	11.0384	11.0357	11.0328	11.189	10.7139	10.5305	10.9252	10.7808	10.9117	10.7593	10.501	10.0413	10.4605	10.0196	10.2044	10.2503	10.5434	9.54234	9.25771	9.56367	9.18416	8.48456	9.19186	8.71513	8.44109	8.50729	10.1365	9.82587	9.85771	10.113	9.98407	10.0373	10.0414	9.93019	10.2793	9.97198	9.38364	10.3409	9.68981	9.09267	9.04331	9.17955	8.9033	9.28292	8.88388	9.08133
E11 Pancreatic Progenitor	1454986_at	Zfp668	8.18294	8.16352	8.0087	8.03585	7.55705	7.56652	7.60991	7.87864	7.87452	7.29125	6.02543	6.14808	5.95147	6.27247	7.28834	7.67692	7.97366	6.04298	6.12654	6.08668	6.35443	6.83523	7.7957	6.60979	6.66826	6.31346	7.17134	7.31207	6.90128	7.27513	6.7135	6.95741	6.60094	6.92845	6.60843	6.71795	7.0372	6.4908	6.89761	6.46277	6.80746	7.23997	6.81818	6.40127	6.53173	6.5817
E11 Pancreatic Progenitor	1420862_at	Dctn4	9.40781	9.38951	9.56098	9.41553	8.7464	8.75992	9.09239	8.23011	8.4501	8.39673	9.0081	8.65738	8.65791	8.48992	8.96533	9.17661	9.36536	7.97574	7.84801	7.64598	7.65506	8.33931	8.51407	7.68646	7.4871	7.7437	8.72126	8.67811	8.59668	8.73327	8.74412	8.60462	8.62805	8.67499	8.58211	8.39251	6.75123	7.78838	8.41364	7.80421	8.21107	8.10567	7.86682	7.75369	7.5795	7.48004
E11 Pancreatic Progenitor	1424149_at	Nsmce2	11.6806	11.5414	11.6159	11.7007	10.7653	10.7755	10.8021	10.8179	11.0427	10.9238	10.6071	10.1411	10.6676	10.1522	10.2939	10.3358	10.4359	9.97395	10.0549	10.2511	9.88621	9.57801	10.3158	10.6224	10.5152	10.4348	10.0149	10.6393	10.2558	10.1693	10.5804	10.7012	10.2891	10.5624	10.5362	10.2197	10.9064	10.3535	10.17	10.625	10.3576	10.2365	10.0065	10.2195	10.2592	10.4244
E11 Pancreatic Progenitor	1434291_a_at	Serf1	12.8546	12.8944	13.0081	12.9555	12.4152	12.4435	12.2973	12.7803	12.6485	12.4991	10.5719	10.8302	10.5249	10.4316	11.9881	12.0868	12.2488	11.2753	10.759	10.6301	11.0017	11.3682	10.8848	9.89983	10.2589	9.76487	12.233	11.9964	12.1365	11.9745	11.7931	12.1873	11.8483	11.3691	11.5544	11.7229	10.8806	10.7251	10.8037	9.58091	9.73541	10.2114	9.81517	9.71487	9.82123	9.3419
E11 Pancreatic Progenitor	1455301_at	Wipf3	8.84876	8.88782	8.69507	8.84133	7.55059	7.66063	7.74641	6.9953	7.59868	7.04425	7.65585	7.91383	7.02512	7.29579	7.15978	7.33486	7.1808	8.10508	8.54939	8.11846	8.11209	8.71209	8.79566	8.73751	8.2737	7.74135	8.03259	8.03941	7.98055	8.07104	7.18034	7.6493	7.62317	7.56877	7.91284	8.28611	7.13065	7.34028	7.02867	7.1403	6.39951	6.93677	7.48154	7.34527	7.14232	7.20823
E11 Pancreatic Progenitor	1430536_a_at	Erh	13.2929	13.3775	13.2425	13.2896	12.9067	12.9146	12.8196	12.9046	12.9226	13.1273	11.1543	11.3223	11.4116	11.1554	12.5578	12.531	12.8294	12.0929	12.0426	11.9194	12.1456	11.1859	10.9188	11.2779	11.1064	11.324	12.7118	12.6195	12.6969	12.7406	12.3847	12.6408	12.5708	12.2674	12.3686	12.3701	12.6202	12.5438	12.4409	11.5046	11.5259	11.5	11.0629	11.2674	11.1865	10.9955
E11 Pancreatic Progenitor	1429786_a_at	Zwint	10.3993	10.3894	10.5951	10.4991	9.45671	9.53774	9.53024	9.37048	9.70107	9.475	8.18368	8.35498	8.47343	8.23711	9.60578	9.62904	9.83952	9.01774	9.30502	9.3184	9.21591	8.67157	8.83935	9.40821	9.60192	9.32228	9.85058	10.3322	9.8285	10.2478	9.01748	9.3191	9.12239	8.97009	9.10224	8.70846	9.80165	9.05352	9.2364	8.35307	8.53863	8.50381	8.24073	8.85577	8.5412	8.1278
E11 Pancreatic Progenitor	1451848_a_at	Cryz	11.1644	11.0111	11.0669	11.0352	11.1341	11.0521	10.837	10.4094	10.48	10.6035	10.1483	10.4605	10.5885	10.4473	10.5951	10.1751	10.2503	10.6812	10.3538	10.2443	10.5362	9.48128	9.08426	9.58038	9.46413	9.7137	9.57764	10.0816	9.77187	9.94868	8.99429	9.73501	9.95152	9.67638	9.72211	9.82656	8.27997	9.59054	9.83421	9.66773	9.3533	9.08503	10.0126	10.4226	9.9606	9.49275
E11 Pancreatic Progenitor	1421106_at	Jag1	9.23487	9.23878	9.09844	9.45219	8.56216	8.39322	8.35755	7.48212	8.25222	8.40203	8.6695	8.9148	8.37645	8.45484	5.9751	6.13585	6.7882	7.76729	6.99129	7.22995	7.51345	7.01754	6.89894	5.99982	7.0138	6.22882	6.91239	6.96756	6.61747	6.8688	8.10398	7.92351	8.72686	7.30862	8.25536	7.717	5.53454	6.56567	5.40777	5.88852	5.88911	6.04783	7.12003	6.4552	6.29705	7.23043
E11 Pancreatic Progenitor	1440081_at	Cep192	8.06287	8.03007	8.14444	8.16391	7.43572	7.37408	7.5224	7.53515	7.35435	7.92617	6.32234	5.83244	5.56563	5.60169	7.1568	6.77648	6.521	6.34971	7.02194	7.28634	7.73663	5.42575	6.15936	7.68559	7.6181	7.63957	7.40232	7.53972	7.56309	7.39502	7.44493	7.11727	7.13466	6.81375	6.17224	7.02626	7.29584	7.45973	7.05817	6.87545	6.79475	6.94113	6.67605	6.78083	6.75597	6.04998
E11 Pancreatic Progenitor	1416370_at	Zscan21	10.1375	10.2386	10.0236	10.1078	9.64305	9.57018	9.78767	9.14707	9.34017	9.04151	8.44922	9.00697	9.07275	8.98341	9.16232	9.32823	9.70363	8.76946	8.37013	8.44997	7.95231	8.72378	9.20447	8.4402	8.25058	8.32973	8.86077	8.76148	8.5199	8.90201	8.83454	8.69725	8.80735	9.04774	8.88732	8.7262	9.08356	8.38715	8.6597	8.27238	8.53725	8.75239	8.31617	8.49194	8.34766	8.56519
E11 Pancreatic Progenitor	1420644_a_at	Sec61a2	8.20224	8.04609	8.28479	8.23479	7.46721	7.07026	7.14374	6.20738	6.75723	6.74614	6.54004	6.29075	6.65228	6.19172	7.4461	7.319	7.47229	6.58836	7.09129	7.09208	7.10399	6.21446	5.22996	6.04478	6.35536	6.06316	7.41452	7.17319	7.31907	7.37649	7.4993	7.79201	8.16535	6.66384	6.93105	6.98536	6.90104	7.56379	7.88556	6.24961	6.29537	5.50034	5.84079	5.97429	5.91298	6.08233
E11 Pancreatic Progenitor	1448318_at	Plin2	11.3479	11.4079	11.3247	11.2976	10.6828	10.5875	10.9148	10.17	10.4186	10.0597	12.4455	11.2539	10.9949	11.7555	9.6014	9.73909	10.2424	10.1809	9.84033	9.9655	9.93806	10.1611	10.3039	9.65885	9.50984	9.15897	10.1713	9.8292	9.95774	9.90384	10.1681	9.7316	9.84584	10.8274	10.6835	9.96589	10.0889	10.068	9.5999	8.81709	8.858	9.55376	10.7164	10.2778	10.1367	10.2161
E11 Pancreatic Progenitor	1460541_at	Slc7a6	10.3687	10.479	10.3624	10.4984	9.88111	9.96343	9.84845	10.1619	10.3406	10.2255	9.25673	8.76857	8.99214	8.82144	9.13107	9.04717	9.19826	9.75199	10.1576	10.0755	9.92942	9.42555	8.88658	9.64445	9.41967	9.71916	9.55254	9.44913	9.28724	9.34925	9.63411	9.19336	10.462	9.44235	9.65156	9.45074	8.48438	9.37806	9.23809	8.93707	8.89604	8.68774	8.40177	8.72657	8.65317	8.26767
E11 Pancreatic Progenitor	1451459_at	Ahctf1	10.3932	10.4665	10.3127	10.5067	9.53825	9.44289	9.79456	9.91596	9.95622	10.2749	9.70737	9.30399	9.58027	9.10873	9.16788	9.25869	9.68583	8.94077	8.96861	9.1046	8.83721	9.41096	10.2772	8.76494	9.24856	8.45529	9.48934	9.48589	9.51144	9.3881	9.20951	9.24096	9.32544	8.94961	9.47017	9.10893	8.87164	9.27614	9.51434	8.39942	8.78796	8.66295	8.49985	8.95533	8.6352	8.60776
E11 Pancreatic Progenitor	1455723_at	D1Ertd448e	8.72978	8.85365	8.66455	8.60875	7.05522	7.10953	7.47885	7.09752	7.7458	7.63319	6.47436	6.94225	7.41298	6.68602	7.2309	7.31883	8.21812	7.47258	7.49976	7.32346	6.95046	6.01912	6.57547	7.07325	7.05729	6.93013	7.95692	7.91939	8.0631	7.85719	7.73923	7.83167	7.60239	6.97779	7.03744	6.63503	7.90924	7.48511	7.81014	6.95534	6.57646	6.86261	6.75209	6.29804	7.13187	6.35881
E11 Pancreatic Progenitor	1439106_at	Zfp462	9.3104	9.2735	9.24345	9.28567	7.21815	7.14765	6.98645	5.23947	7.14089	7.22132	6.63058	6.99772	7.87354	6.76523	7.01879	7.08848	7.21065	8.1267	7.54117	7.8009	7.61277	8.56131	8.21799	8.7039	8.72204	9.07756	8.16162	8.50403	7.89783	8.23553	7.89525	7.64277	7.8675	8.00096	8.37984	8.23967	6.4375	7.56252	8.04936	8.35694	7.90152	7.95116	8.66819	9.39942	9.06747	9.53962
E11 Pancreatic Progenitor	1426427_at	Ttll1	8.70237	8.77785	8.78687	8.61934	7.68187	7.72818	8.01506	7.64698	7.97536	8.02514	6.91723	6.06157	6.46691	6.29842	7.99341	8.03409	8.96364	6.49992	7.27234	6.82398	6.33653	7.29934	6.87695	6.73972	6.66142	6.23451	8.46373	8.22224	7.86773	8.34862	7.78135	8.21711	8.15161	7.41539	7.60234	7.42592	8.5397	7.42677	8.02336	7.46812	7.31217	7.16962	7.33711	7.73073	7.40613	7.15102
E11 Pancreatic Progenitor	1417657_s_at	Dnajc2	12.5092	12.4101	12.2898	12.3871	11.9545	11.9346	11.9758	11.8417	12.2374	11.8398	11.0041	10.801	10.6849	10.7587	11.1852	11.2501	11.6155	11.0557	11.2509	11.1003	10.6097	10.9094	10.9416	11.1947	10.8197	10.5943	11.0949	11.4269	11.2813	11.1524	11.2121	10.9308	11.0935	11.3415	10.9953	10.7125	10.0498	10.8403	10.8164	10.794	10.8506	11.0231	10.9719	10.8709	10.9546	10.7944
E11 Pancreatic Progenitor	1416070_a_at	Ddx18	11.9934	12.0015	12.0064	12.1693	11.7874	11.7259	11.6661	11.736	11.989	11.7025	10.0848	10.1537	10.3212	10.4706	11.0078	10.9403	11.0378	10.6344	10.6038	10.4429	10.3696	11.1761	10.6681	10.5969	10.5568	10.4011	10.9741	11.0539	11.1331	11.0269	10.9176	10.7714	10.7984	11.1085	11.037	10.8962	11.3661	10.9723	10.9733	10.8382	10.7281	10.7415	10.6302	10.7905	10.7049	10.2629
E11 Pancreatic Progenitor	1421063_s_at	Snrpn	9.75092	9.77969	9.89538	9.77062	7.85408	8.31882	7.61287	8.06183	8.29902	8.47343	7.00269	7.29247	7.27152	7.1591	8.02399	7.86644	8.62531	8.52401	8.57606	9.04051	8.97264	9.50093	7.2019	8.77911	9.2052	9.16376	9.13429	9.29307	9.07728	9.32194	8.24236	8.90417	8.80441	7.46626	7.93645	7.78156	9.74176	9.42265	9.99246	8.32449	8.91681	7.71502	8.64098	9.42471	8.85409	8.12996
E11 Pancreatic Progenitor	1452618_at	Cdk5rap2	9.13631	8.92054	8.96467	9.07444	8.61107	8.79611	8.7918	8.28127	8.69083	8.33578	8.07077	8.35391	8.06594	7.88237	7.6924	7.77467	8.13311	7.21184	6.67367	6.68651	6.76177	7.04951	7.84394	7.43772	7.50348	6.28754	7.45753	7.98461	7.47891	7.79699	7.66736	7.76144	7.80144	7.86527	7.82456	7.81671	8.47883	6.97521	7.13445	7.57551	7.62556	8.06489	7.76882	7.1564	7.3292	7.15905
E11 Pancreatic Progenitor	1428475_at	Llph	12.3255	12.3915	12.2957	12.3531	12.1272	12.2155	11.9882	12.0161	12.4644	12.1467	11.501	11.4078	11.696	11.7595	11.5584	11.5437	11.9863	10.579	10.7582	10.3923	10.5737	10.8295	11.1672	10.5291	10.4336	10.6659	11.3923	11.5999	11.564	11.6539	11.4641	11.3093	11.2978	11.4899	11.5106	11.3068	8.96362	11.2285	11.2592	10.9337	11.0287	11.0187	10.9561	10.7598	10.9967	10.9785
E11 Pancreatic Progenitor	1443911_at	Xpo1	9.05646	9.19557	9.04792	9.04262	8.46079	8.63484	7.51879	7.49774	7.66587	8.21802	7.66089	7.09438	6.29833	6.89587	8.3983	8.06748	7.67043	7.1829	8.39711	8.65296	8.57831	5.21093	6.35782	8.65246	9.15395	8.8851	7.6703	8.31863	8.35615	7.63322	7.7834	7.93491	7.6561	6.77694	6.83297	7.46916	8.24256	7.91919	7.4064	8.32455	8.16005	6.75312	6.98319	7.00282	7.68092	7.86745
E11 Pancreatic Progenitor	1452490_a_at	Ap2a2	9.73071	9.69045	9.59915	9.5255	8.80157	9.0622	9.01713	9.13015	9.50914	9.24097	8.84469	8.43947	8.14953	8.48927	8.06209	8.10755	8.53886	7.82807	7.49162	7.0231	7.01826	8.43565	8.06692	8.0939	7.7353	7.69407	8.43209	8.27827	8.47839	8.48301	8.72481	8.5216	8.77999	8.70149	8.50242	8.79281	7.97451	7.9784	8.36995	8.66283	8.57434	8.8106	8.67914	8.70625	8.66	8.50379
E11 Pancreatic Progenitor	1451516_at	Rhebl1	8.30885	8.18391	8.15889	8.29236	6.11559	6.25134	6.2891	5.74888	6.22162	5.53387	6.24098	6.25737	6.50643	6.12727	6.83504	6.74859	6.87917	6.83313	6.67813	7.34655	7.19558	5.98385	6.67858	6.88085	7.41294	6.61184	6.84198	6.78809	6.74089	6.83154	7.20655	7.33447	7.96666	7.17949	6.96215	7.03727	11.1881	7.09024	6.81435	6.76273	6.98599	6.54187	6.32303	6.43156	6.19631	6.28757
E11 Pancreatic Progenitor	1426109_a_at	Slc14a2	8.54715	8.56293	8.88409	8.58502	6.00485	6.22037	5.71565	6.42279	6.05238	6.06367	5.5981	5.48531	6.00236	6.28223	7.6009	8.08245	7.66022	6.38084	6.86223	6.80283	6.29102	6.42652	6.80187	6.09327	6.2625	6.22348	7.99975	8.91855	8.02249	8.58636	6.74064	7.86372	7.22212	6.29081	6.15325	5.99433	6.16763	5.32393	5.45722	5.84988	6.3525	6.11399	5.68356	5.7492	6.163	5.70755
E11 Pancreatic Progenitor	1458509_at	Mre11a	8.92179	9.05431	8.97596	9.09331	8.40652	8.48452	7.65142	8.01	8.29215	8.43836	6.9718	6.57768	7.3097	6.77696	8.30305	7.92853	7.69183	7.79662	7.9867	7.7015	8.60705	7.50002	6.63596	8.40785	9.32078	9.35227	7.70586	8.27687	8.20392	8.19818	7.7428	8.14411	8.26266	6.51708	7.01569	7.05004	7.23518	8.33764	7.97893	8.14278	8.07161	7.58544	7.72252	7.82049	7.27207	7.73661
E11 Pancreatic Progenitor	1439864_at	Ccdc40	8.74054	8.68366	8.50858	8.70048	6.56417	6.25994	6.49805	5.946	6.19731	5.82351	5.37561	6.08701	6.02464	6.0646	7.34565	7.13584	7.40266	7.4816	7.89806	7.13707	7.04495	8.07047	8.53347	7.99273	7.48343	7.0978	8.22112	8.38251	7.94263	8.32908	7.90273	7.73969	7.9114	7.86521	7.2984	6.95533	7.51091	6.44448	7.34239	7.10984	7.66209	7.99478	6.84162	6.9978	7.21572	7.02054
E11 Pancreatic Progenitor	1423297_at	Add3	9.33128	9.19056	9.23804	9.21151	9.00517	9.09337	8.81272	8.76781	9.42303	9.0239	8.68029	9.07054	8.46052	8.5238	7.3734	7.41627	7.99525	7.55412	7.59045	7.61067	7.49451	7.08216	7.70108	7.52306	7.33317	6.62913	8.123	8.29306	7.94565	8.21206	8.50336	8.59973	8.43024	8.2878	8.65864	9.32244	8.14613	8.48852	8.1694	7.56721	7.7455	7.51036	7.58186	7.55758	7.89469	7.52633
E11 Pancreatic Progenitor	1433995_s_at	Ccdc50	11.6765	11.7279	11.7872	11.8382	11.0815	10.8564	11.4123	10.8831	10.7739	11.0574	11.1178	10.9136	11.0376	10.8108	11.3676	11.4732	11.6304	10.189	10.2605	10.4912	10.3319	9.77206	9.46356	10.4644	10.5218	10.1656	11.2357	11.0262	11.1202	11.0648	11.0053	11.0632	11.1009	10.8185	11.3531	11.1279	10.9547	11.228	10.5015	9.55181	9.58595	9.45891	9.69083	9.86103	9.91124	9.63514
E11 Pancreatic Progenitor	1460730_at	Eif2b1	10.6616	10.521	10.6798	10.5621	10.0536	10.19	9.87524	10.2684	10.7078	10.2878	8.64895	8.87992	8.80582	9.16999	9.82172	9.96519	10.1451	9.17113	9.26106	9.24201	8.79522	9.4367	9.30636	9.67026	9.45586	8.97186	9.79192	10.1032	9.65916	10.29	9.91733	9.57849	9.67709	9.80343	9.6982	9.3155	10.2646	9.42876	9.37373	9.52925	9.7533	9.87681	9.30336	9.42293	9.25416	9.03262
E11 Pancreatic Progenitor	1424110_a_at	Nme1	13.0857	13.0915	12.9378	12.9937	12.6427	12.7481	12.451	12.7968	12.8627	12.8932	10.5176	10.6347	11.0153	11.0111	11.9242	12.0947	12.2954	11.2822	11.2831	10.9579	11.254	11.2779	11.275	11.8259	11.5261	11.4156	12.2309	12.523	12.6193	12.6002	12.284	12.4491	12.3319	11.9511	11.9721	12.002	12.4067	12.2025	12.2829	12.0079	11.9419	11.9495	11.6125	11.7024	11.8378	11.7508
E11 Pancreatic Progenitor	1421945_a_at	Rpf2	12.0671	12.1648	12.3255	12.3593	11.2446	11.2546	11.3428	11.259	11.7511	11.5818	9.27197	9.32858	9.42324	9.25034	10.8442	10.939	11.3235	10.3316	10.6721	10.5145	10.2791	9.37587	10.139	9.9571	9.8025	9.89845	11.2606	11.1367	11.1709	11.3047	10.4858	10.731	10.7586	10.3027	10.5778	10.2987	11.1257	10.697	10.4624	9.67392	9.88697	9.72774	9.508	9.66998	9.47719	9.5279
E11 Pancreatic Progenitor	1454927_at	Zfp41	8.97193	8.73939	8.74271	8.71096	7.88298	7.74747	8.16051	7.72079	8.28511	7.65693	5.99532	6.38852	6.0124	6.45324	7.18781	7.34024	7.84513	7.25701	7.45161	7.29059	7.41961	7.85958	6.55407	7.11477	6.7076	7.05046	7.30935	7.1146	6.68468	7.3062	7.47914	7.43952	7.84801	7.69909	7.4486	7.43742	6.52822	6.27909	6.54174	7.08662	7.07498	7.34433	6.78567	6.39424	6.67232	5.89788
E11 Pancreatic Progenitor	1427309_at	Pars2	8.00739	8.08849	8.08591	8.00677	7.50981	7.58673	7.76212	7.67567	7.85358	7.35513	5.74286	5.38942	5.7931	5.37863	6.7543	6.9499	7.43907	6.37462	6.4713	6.29679	6.8692	7.48784	7.70104	7.29971	7.21688	6.13253	7.46935	7.28987	6.82625	7.61006	7.25135	7.07172	7.01124	7.2272	7.42104	7.17458	6.66723	6.26201	6.98298	7.39881	7.64575	7.43662	7.19089	7.01693	6.80665	6.88841
E11 Pancreatic Progenitor	1453165_at	Mettl4	8.4	8.47303	8.39772	8.37078	8.23778	8.19238	8.17171	8.34854	8.87799	8.55749	6.5561	7.47676	6.41063	6.75062	7.89357	7.86916	8.30837	7.38696	6.89969	6.33716	7.12686	7.14403	7.2901	7.16561	6.8987	6.20863	7.74517	7.67235	7.19414	7.59215	6.71874	7.12496	7.58231	6.66885	6.74665	7.03367	6.76042	7.17435	7.42813	6.84617	7.16321	7.8869	7.34576	7.74175	7.23783	7.559
E11 Pancreatic Progenitor	1423568_at	Psma7	13.2642	13.1711	13.0866	13.1929	12.6608	12.7389	12.7714	12.8231	12.8538	12.8086	11.398	11.3534	11.3861	11.529	12.4183	12.3968	12.8055	11.5479	11.3502	11.4182	11.5324	11.254	11.3022	11.8678	11.6305	11.5243	12.6841	12.7336	12.7372	12.7911	12.4878	12.6004	12.6203	12.397	12.564	12.4418	11.8621	12.6994	12.6443	12.0349	12.3235	12.2261	11.7625	11.9685	11.9272	11.782
E11 Pancreatic Progenitor	1419686_at	Tsga14	7.88687	7.78952	7.74881	7.72318	7.49169	7.43053	7.3416	6.85259	7.42422	7.29603	5.83716	6.1338	5.80949	5.60835	7.2668	7.01779	7.14266	6.09239	6.84706	6.83325	6.09722	6.7052	5.7015	7.3522	7.04626	7.15667	7.00504	7.49106	7.00673	7.15182	6.18136	7.21559	7.05648	5.38711	6.23615	6.13444	8.0128	6.5822	7.09069	6.50885	6.57803	6.31967	5.88921	6.18702	6.42189	6.10998
E11 Pancreatic Progenitor	1429047_at	Rtf1	9.8472	9.86052	9.91974	10.0272	9.4539	9.47778	9.73886	9.20372	9.27798	9.44309	8.64038	8.48314	8.67338	8.45274	9.34322	9.39542	9.60736	9.20498	8.75239	9.21121	9.18481	7.62559	8.40556	7.93579	8.04087	7.69926	9.50024	9.19274	9.25324	9.06672	8.70483	9.08482	8.88292	8.74947	9.31302	9.03243	9.2366	9.07602	8.88767	7.84372	8.30141	8.21279	8.1159	8.34333	8.35976	8.50978
E11 Pancreatic Progenitor	1451323_at	Zfp7	10.2146	10.0902	9.95622	10.0548	9.49937	9.33731	9.48158	9.01085	9.45365	8.97426	9.45065	10.0162	9.98928	9.46868	9.74008	9.78195	9.74868	8.30273	8.48141	8.27398	8.34005	8.09641	8.5133	8.64929	8.88624	8.42721	8.94046	8.71367	8.50397	9.00597	8.6285	8.72674	8.47477	8.30896	8.09345	8.154	8.50864	7.94673	8.17549	7.60384	8.03119	7.92762	7.87761	8.04999	8.06918	8.07398
E11 Pancreatic Progenitor	1456668_at	Zcchc11	9.5862	9.725	9.73781	9.826	9.14715	8.93443	8.59002	7.44727	7.60555	8.03601	7.64004	7.73132	7.73361	7.24621	9.3663	9.21567	8.35073	8.09598	8.8689	9.66187	8.84735	8.16693	7.58071	8.94547	9.15305	9.18598	8.4721	8.96042	9.1872	8.91163	8.49579	8.9041	8.54352	7.44322	6.93203	7.6321	9.45092	9.08677	8.7328	8.50023	8.6214	7.28914	7.70872	8.23563	7.87037	7.93699
E11 Pancreatic Progenitor	1451833_a_at	Setdb1	10.0967	10.1944	10.3005	10.3124	9.90722	9.75828	9.93756	9.59199	9.79124	9.92928	8.32353	8.18587	8.12019	7.7529	9.29728	9.45001	9.4108	8.67476	8.30474	8.76927	8.60659	8.15329	7.96581	8.83222	8.62835	8.36507	9.70603	9.51583	9.41645	9.77527	9.44454	9.15639	9.56133	8.84485	9.1659	9.10492	9.77281	8.89778	9.03463	8.2522	8.31424	8.05064	7.97846	8.12279	7.5223	8.15129
E11 Pancreatic Progenitor	1448419_at	Pop4	12.0162	11.733	11.7971	11.9022	11.1977	10.6743	11.3383	10.4419	11.4272	10.9448	10.2726	10.7924	11.1928	10.9195	10.5658	10.3192	11.0735	10.58	10.4406	9.98976	10.1994	10.0537	10.048	9.95925	9.65319	10.056	10.2723	9.98859	8.96216	9.68015	10.5933	9.38031	10.0573	10.845	10.9201	10.7572	8.91125	9.67001	9.24904	9.60344	9.69621	9.90027	9.72233	10.2306	9.78227	9.56128
E11 Pancreatic Progenitor	1416665_at	Coq7	11.4952	11.5369	11.3555	11.4164	10.8963	10.9082	10.7036	11.046	11.2399	10.953	9.73655	9.80918	9.70643	9.9783	10.363	10.3957	10.7474	9.61143	10.4322	9.85931	9.89468	10.6532	10.7556	10.4852	9.74686	9.96266	10.3959	10.4405	10.3545	10.6973	10.3738	10.6538	10.3176	10.6134	10.4828	10.2029	11.2675	10.1455	10.3905	10.0416	10.2243	10.5121	10.5263	10.5164	10.5418	10.0531
E11 Pancreatic Progenitor	1430392_at	9530086O07Rik	8.03294	7.91942	7.99907	8.13348	6.11494	6.56628	5.11666	6.01873	6.65231	7.07121	6.08304	5.97141	7.08007	5.76691	5.6888	5.98847	5.35202	6.79906	7.65825	6.74985	7.22089	7.84638	6.56448	7.5396	7.57924	8.27157	6.44192	5.69471	6.18779	6.64439	8.95486	7.54845	7.08736	6.64884	6.6015	7.90157	6.21814	6.63743	6.37663	6.61719	6.54142	6.4191	6.11237	6.7441	6.76846	6.76559
E11 Pancreatic Progenitor	1456620_at	Gnptab	8.36725	8.25608	8.31007	8.4208	8.14637	8.35847	7.78012	8.35621	8.8985	9.05538	7.11405	7.61206	7.28982	7.23717	6.92925	6.81763	7.3906	7.18919	6.79097	7.40128	7.37098	6.96661	5.89188	6.51472	7.10379	7.31841	7.3744	7.13759	6.92075	7.14681	7.57919	7.23994	7.24359	6.95717	7.38739	7.2091	7.00609	7.6981	7.67693	6.92339	6.77089	6.5358	6.68508	7.35852	7.15751	6.98135
E11 Pancreatic Progenitor	1455735_at	Ap1s3	9.72182	9.85071	9.88448	9.78788	9.50972	9.296	9.61001	9.3566	9.19011	9.49119	8.68635	9.0986	8.87074	8.75027	8.68463	8.62407	8.8764	8.75212	9.17571	9.42683	9.27149	8.55543	7.98482	7.46043	7.98922	7.93597	9.26094	9.19351	9.53898	9.29551	8.40618	9.15176	8.70178	8.3813	8.52386	8.90345	6.4911	8.70942	9.02669	8.59769	8.70178	8.65948	8.52294	8.86702	8.24695	8.30585
E11 Pancreatic Progenitor	1435728_at	Tyw3	7.85568	7.8013	7.70517	7.9489	7.39208	7.56348	7.63846	7.74604	8.02382	7.49998	6.34136	6.8237	6.52469	6.21183	5.94159	5.764	6.06754	6.40041	6.44984	6.49868	6.48844	6.60898	7.66783	6.62937	6.59864	6.27899	6.21998	6.05334	6.20254	6.32439	6.45958	5.69665	6.01017	6.48603	7.1425	6.26919	6.42334	6.02538	5.91474	6.35324	6.60326	6.44767	6.5566	6.18557	6.43374	6.04174
E11 Pancreatic Progenitor	1455035_s_at	Nop56	12.9691	13.0905	13.0024	13.1417	12.7024	12.6714	12.5145	12.6814	12.8811	12.5497	11.8728	11.8883	12.0784	12.1833	11.4692	11.6115	11.855	11.8122	11.9646	11.8933	11.5065	12.5763	12.5564	12.0492	11.9955	12.1926	11.5909	11.7766	11.6787	11.7925	11.9125	11.7988	11.8399	12.007	11.8088	11.7807	12.0277	11.933	11.6712	11.6777	11.7752	11.7392	11.8335	11.6629	11.7323	11.3575
E11 Pancreatic Progenitor	1427105_at	Cenpn	9.73552	9.70637	9.46046	9.46577	9.31553	9.46657	9.56193	9.14483	9.87191	9.52911	7.11045	7.1882	6.48102	6.8801	7.55809	7.55308	8.30247	8.47092	8.59571	8.2849	8.07452	6.7333	6.57514	6.51494	6.16646	6.58235	7.3616	7.21746	7.32173	7.31644	8.15155	8.0863	8.62627	8.06	8.03253	8.46789	7.05694	6.9542	6.99451	7.25148	7.47161	7.83121	6.79436	6.43987	6.81537	6.40239
E11 Pancreatic Progenitor	1450992_a_at	Meis1	9.54757	9.54446	9.48364	9.36685	8.80333	8.63829	9.45623	9.41292	9.05123	9.13191	8.7372	9.40713	9.30729	9.13654	8.04106	7.91238	8.33526	8.52527	8.12814	8.07283	8.33329	8.50939	9.42126	7.97274	7.9698	7.98352	8.1236	7.75039	7.79749	7.23792	8.68784	8.07482	7.93976	8.67624	8.89524	9.37122	8.01465	7.11517	7.41656	7.50119	7.62684	7.54992	8.09815	7.94633	7.46211	7.70681
E11 Pancreatic Progenitor	1446104_at	Srgap3	8.67359	8.52926	8.57747	8.72127	8.64116	8.06634	8.48203	8.51895	8.24566	8.83071	6.28494	6.6127	7.01646	6.20445	7.00721	6.68808	6.53664	7.46427	8.35919	8.65933	7.96814	8.11937	8.02474	7.97741	7.81653	7.37616	7.10888	7.03897	7.32945	7.50373	6.88413	7.23508	7.39851	6.65326	5.8353	7.12116	5.85367	6.83519	6.24856	6.6648	6.38575	6.73769	6.73149	6.50023	6.26192	5.94181
E11 Pancreatic Progenitor	1438528_at	Pcm1	9.96662	9.98641	10.0321	10.1368	9.14458	9.01974	8.7596	8.01441	8.28953	9.00364	8.27875	8.35398	8.72188	8.2135	9.64728	9.69813	8.98987	8.48506	8.32585	10.1043	9.88325	7.86696	8.51263	9.21134	9.9354	9.97956	8.87702	9.35077	9.36737	9.49283	8.71016	9.39162	8.8447	8.46379	8.22945	8.90554	6.88652	9.85284	9.38041	9.40271	9.32615	8.21606	8.03532	8.71821	8.72037	8.36732
E11 Pancreatic Progenitor	1421015_s_at	Pole3	9.55193	9.51876	9.39507	9.54379	9.82896	10.012	9.47398	9.36687	9.83921	9.61258	8.25468	8.6709	8.62785	8.78916	8.63493	8.42444	8.90277	8.62995	8.08426	8.17493	8.58207	9.22676	7.82268	7.94847	8.01365	8.01951	7.58734	7.82714	7.69004	7.82275	7.96028	7.66717	7.64222	8.06566	8.12837	7.99125	8.35917	7.77563	7.71349	7.77285	7.76817	8.31392	8.3658	8.31474	8.13662	8.55636
E11 Pancreatic Progenitor	1423811_at	Sf3a3	11.0985	11.0956	10.898	11.0612	10.8011	10.8385	10.8829	10.645	10.7945	10.4417	9.46099	9.4239	9.48004	9.40952	10.0219	10.0455	10.4636	9.67173	10.2257	9.89159	9.53121	9.75902	9.86605	9.53908	9.4397	9.5012	9.80134	9.63329	9.62183	9.82221	10.3027	9.79107	9.65205	10.1513	10.0661	9.9387	9.89041	9.45892	9.30324	9.37201	9.43323	9.72324	9.38927	9.22391	9.21494	8.98931
E11 Pancreatic Progenitor	1426364_at	Mrrf	9.86418	9.98916	9.8108	9.84293	9.35212	9.43797	9.34491	9.33803	9.49506	9.21238	8.65113	9.20117	8.90803	8.99621	9.25584	9.29064	9.65061	8.27995	7.82488	7.90653	7.80816	8.93449	9.00227	8.74694	8.54497	8.23008	9.10435	9.23463	9.18621	9.32776	9.2805	8.89832	8.81109	8.78382	8.87846	8.85969	6.81885	8.73196	8.79423	8.89864	8.97106	9.37895	8.9203	8.76704	8.76913	8.86466
E11 Pancreatic Progenitor	1425452_s_at	Fam84a	8.77296	8.97379	8.75973	8.87155	7.66444	7.18077	7.32549	6.30643	6.17409	6.36803	6.65529	7.19418	6.31407	6.06188	8.22759	7.85809	8.01658	8.09173	7.3397	7.49134	7.58856	7.58349	7.09873	9.43278	9.16415	9.6325	7.98359	8.1131	8.52599	7.87522	7.28767	8.12565	7.76371	6.28988	6.57934	7.17602	6.31137	7.0744	7.64479	6.2722	6.10617	6.60904	6.27483	7.08696	5.9596	7.03183
E11 Pancreatic Progenitor	1427030_at	Ccdc52	9.90093	10.002	10.0727	10.0713	9.94686	9.44306	10.3094	9.39999	9.18639	9.58276	8.90395	9.10982	8.75706	8.31303	9.40736	9.25504	9.52639	8.19368	8.31331	8.08199	7.89441	8.15427	7.82212	8.41971	8.42419	8.13703	9.52667	9.34492	9.30796	9.10353	9.4597	9.35809	9.4969	8.53409	9.07596	9.80991	9.83144	8.83767	9.10083	8.45439	8.28739	8.56756	8.00531	8.37981	8.1686	8.26695
E11 Pancreatic Progenitor	1457568_at	Hnrnpd	9.23843	9.20645	9.21429	9.21466	8.48793	8.53511	8.65797	8.43891	8.10803	8.58399	8.50823	8.19717	8.59236	8.17624	8.42902	8.27768	8.51534	7.99627	8.838	8.9582	8.57946	7.06176	7.45224	7.67956	7.65233	8.05426	8.80301	8.76137	8.57093	8.24521	8.20257	8.80168	9.58135	7.77518	8.12548	7.76279	9.0686	7.96642	8.46222	7.34131	7.28481	6.99749	6.60824	7.10808	7.10461	6.50141
E11 Pancreatic Progenitor	1430648_at	Scn2b	10.037	10.0003	10.0122	9.78845	9.50026	9.17317	9.15287	9.05074	8.74205	9.15797	6.51205	6.9476	7.36863	7.19781	8.64742	8.61012	9.02119	8.56917	9.1945	9.2432	9.44933	9.36874	7.4958	8.81148	9.43519	10.2977	9.05545	8.66295	8.48686	8.88927	7.7981	8.23295	8.52703	7.44678	8.02253	8.38456	9.43041	7.40792	8.14081	7.40976	7.37733	6.88437	7.9343	7.48855	7.52673	8.96221
E11 Pancreatic Progenitor	1431187_s_at	Dlg5	11.7016	11.553	11.7734	11.6913	10.7253	10.5922	10.2187	9.61953	10.137	9.91784	10.1323	10.3186	10.4074	10.2851	10.6334	10.576	10.9781	10.6948	10.6164	10.582	10.1276	10.5439	9.36213	10.0172	10.2345	9.83453	10.679	10.985	10.6871	10.7715	10.3939	10.5643	10.4781	10.6429	10.4752	10.4336	10.191	9.40564	9.82328	10.852	11.1617	11.0554	10.4371	10.4727	10.2056	10.3271
E11 Pancreatic Progenitor	1424425_a_at	Mtap	11.0969	11.2273	10.9962	11.0707	10.6723	10.7865	10.6734	10.6578	10.6084	10.8419	9.92717	10.0201	9.81747	10.0034	8.51489	8.76656	9.61169	10.2501	10.3004	10.0957	10.1786	10.174	10.7563	9.92147	10.0157	9.653	9.43584	9.31145	9.43686	9.40015	10.2159	9.37909	9.83564	9.41528	9.59213	9.52676	9.45117	9.83494	9.80113	9.4397	9.57216	9.99251	10.1279	10.0778	10.1089	10.4008
E11 Pancreatic Progenitor	1415869_a_at	Trim28	13.3755	13.285	13.1651	13.2007	12.9372	12.8478	13.0239	12.9082	12.9776	12.7528	11.941	11.9529	11.8797	11.9494	12.3118	12.3778	12.7481	11.3248	11.2776	11.1287	10.9659	11.9107	11.9519	12.0218	11.7538	11.5987	12.2949	12.4874	12.3795	12.4822	12.6671	12.5381	12.5555	12.5034	12.4053	12.3143	12.4043	11.49	11.5664	11.7176	11.833	12.1757	11.8281	11.5011	11.664	11.5799
E11 Pancreatic Progenitor	1426027_a_at	Arhgap10	7.98526	7.96505	7.80605	7.88324	7.62589	7.51493	7.52722	7.53086	7.45115	7.35608	7.48943	6.62867	7.48249	7.14643	6.74558	6.72518	6.69662	6.43401	5.58592	5.98085	5.79697	6.60688	6.58619	5.94461	6.18739	6.78252	6.78636	6.34809	6.48223	6.5461	7.91866	6.81146	7.13405	7.7521	8.11822	8.04674	6.85655	6.43534	5.93977	6.16145	6.21332	6.5092	6.42405	6.25831	6.72511	6.41086
E11 Pancreatic Progenitor	1425396_a_at	Lck	8.22095	8.13681	8.32085	8.23017	7.59094	7.64232	8.03103	7.58287	7.83207	7.60791	6.66712	6.62998	6.87412	6.17346	6.33784	5.85286	6.89787	6.95994	7.85921	7.9096	6.87147	7.83935	8.78362	7.21025	7.21961	6.85317	6.80994	6.74181	6.27603	6.95162	5.89261	6.92714	6.37021	6.45431	6.48109	6.43487	6.2614	8.83224	5.43938	5.75618	4.94569	4.82492	6.02933	6.12203	5.95966	5.36749
E11 Pancreatic Progenitor	1429549_at	Col27a1	10.2548	10.4394	10.4761	10.4902	10.3658	9.80282	10.4978	8.54602	8.66896	8.56318	9.70618	10.4244	10.2867	9.55895	8.37716	8.56849	9.00428	9.35648	9.2164	8.88639	9.50326	9.17956	8.73568	9.87807	9.66858	9.1014	8.67372	8.58776	8.882	8.88012	9.3866	9.49563	9.15011	8.97925	9.29321	9.12237	7.32547	7.99058	7.84208	7.03264	6.6015	6.85197	7.90155	7.97603	8.46444	8.22224
E11 Pancreatic Progenitor	1426655_a_at	Fam63a	9.71667	9.55148	9.53923	9.60762	9.64396	9.46314	9.96809	9.60545	9.56906	8.98293	9.21777	8.86385	8.98578	9.11357	8.8544	8.98504	9.11296	7.63348	7.45911	7.26594	7.20596	7.77496	8.0387	7.50902	7.59801	7.40504	8.408	8.30056	8.26091	8.39635	8.63668	8.1398	8.40172	8.81099	8.6537	8.4557	9.14554	7.56383	7.99715	7.98649	7.68748	8.20109	7.84124	7.80889	7.77212	8.15295
E11 Pancreatic Progenitor	1424588_at	Srgap3	9.49388	9.76184	9.60769	9.73633	9.55323	9.42483	9.93011	9.4995	9.48656	9.42312	8.40713	8.66719	8.6038	8.09675	7.57776	7.64563	8.32417	8.34457	8.40019	8.27674	8.02401	8.30799	8.06126	8.1758	8.13521	8.2331	8.56972	8.76522	8.5429	8.47021	7.44493	8.1363	7.89825	7.35924	7.36807	7.69275	6.29021	6.84841	6.5967	6.60569	6.42404	6.26946	6.76766	6.70284	6.434	6.423
E11 Pancreatic Progenitor	1429600_at	Mthfd2l	9.75056	9.93759	9.66118	9.61779	8.76593	8.605	8.87659	8.15136	8.29614	8.51767	8.5045	8.80215	8.40757	8.42704	9.01692	9.24081	9.6933	7.96824	7.86047	7.70098	7.83574	7.39886	7.07917	7.69633	7.42134	8.08302	8.33325	8.31229	8.22694	8.35888	8.77652	8.20234	7.92418	7.77822	8.01839	7.85311	8.01577	6.9875	7.2621	7.43147	6.74503	6.75134	7.32804	7.52247	6.78091	6.60573
E11 Pancreatic Progenitor	1427112_at	Ttl	8.81979	8.92152	9.04238	8.95059	8.11967	8.25159	8.14598	8.11106	8.68881	8.13407	8.40125	8.06215	8.02012	8.07981	7.8746	7.71525	8.37958	7.48597	7.09844	6.9674	7.17211	6.96213	8.16332	7.60552	7.208	7.14531	7.70711	7.19937	7.41455	7.52039	8.21893	8.07303	8.06678	8.33238	8.40829	7.86907	8.26685	6.82877	7.96178	7.194	7.64206	7.65666	8.15471	8.30238	7.79254	8.13036
E11 Pancreatic Progenitor	1429054_at	Mrpl47	12.5337	12.5956	12.4165	12.4218	12.1454	12.2471	12	12.3501	12.5907	12.3757	10.2336	10.8187	10.7705	10.9511	11.6332	11.8007	12.1668	11.4542	11.5797	11.4117	11.4876	11.6209	11.3854	11.3706	11.1115	11.2351	11.4249	11.5059	11.4555	11.4862	11.1558	11.4442	11.4065	11.4002	11.3184	11.2526	11.6748	11.4059	11.5429	10.9943	11.1757	11.1599	11.0699	11.1669	11.0984	10.8162
E11 Pancreatic Progenitor	1451254_at	Ikbkap	12.3762	12.3406	12.3815	12.1827	11.3971	11.4467	11.3888	11.4227	11.7186	11.3887	10.6047	10.7283	10.7242	10.6762	11.2079	11.2314	11.6137	10.9769	11.1498	11.0763	10.8892	11.3214	11.4542	11.3618	11.3582	11.1703	11.3488	11.5897	11.5954	11.406	11.3458	11.551	11.0638	11.2954	11.1127	11.0743	8.78908	10.7694	11.0424	11.33	11.3562	11.4814	11.1788	11.2162	11.3016	11.0893
E11 Pancreatic Progenitor	1433553_at	Garnl3	8.95172	8.80177	8.88749	8.73027	7.36817	7.12463	7.19181	7.15799	6.95749	6.46314	7.79977	7.64057	8.06777	8.1247	7.13412	7.1377	7.24573	7.81663	7.72121	7.98157	7.73014	7.9259	6.95058	7.56428	7.47913	7.99571	8.0492	7.99908	8.11679	8.26264	8.70653	8.63726	8.51781	8.33901	8.40216	8.27209	8.32244	7.42854	7.16482	7.43082	7.57802	7.69643	7.46814	7.85132	7.32972	6.85709
E11 Pancreatic Progenitor	1453343_s_at	Vrk2	11.0736	11.0515	11.2107	11.2191	11.0635	10.7967	11.2909	10.9343	11.1816	10.8653	9.59776	10.1889	9.92018	10.0156	9.90966	9.92216	10.2754	9.71881	10.099	9.58888	9.91441	9.88747	10.5553	10.003	10.1276	9.46869	9.98817	9.83492	9.99412	9.97854	9.76211	9.72824	10.078	10.1001	10.2044	10.1199	10.3818	10.4581	10.0354	9.61611	9.5612	10.0374	9.54724	9.68008	9.5766	9.50328
E11 Pancreatic Progenitor	1435695_a_at	Ggct	11.1536	11.1006	11.2879	11.2773	10.7678	10.6173	10.6387	10.1995	10.5084	10.2227	10.3797	10.7023	10.5777	10.6216	10.6597	10.5065	10.8153	10.0138	10.0471	10.0398	9.62282	10.7624	10.4309	10.0918	10.1316	10.0895	10.5254	10.4306	10.3957	10.3281	9.9777	10.2631	10.1066	9.47553	9.23403	9.40408	8.20499	9.83554	10.0024	9.59447	9.68138	9.67956	9.9043	10.0503	9.72413	9.5376
E11 Pancreatic Progenitor	1421429_a_at	Npnt	8.19733	8.27258	8.07574	8.28462	7.19315	7.08584	7.01637	6.40015	6.93845	6.94112	5.30404	6.21979	5.91804	6.80463	6.99261	6.85124	7.01885	7.19081	6.96922	7.12736	7.24344	6.53985	6.19269	6.11641	6.14045	6.17823	7.89601	7.98241	7.88252	8.08458	7.51635	7.53126	7.75518	7.37459	7.33502	7.24649	8.12821	7.60679	7.83338	7.21125	8.0422	7.03742	6.71605	6.55317	6.82261	6.40767
E11 Pancreatic Progenitor	1450253_a_at	Map3k4	9.39838	9.5534	9.46865	9.59927	8.60629	8.67377	9.0848	8.8056	8.97323	8.84895	8.61455	8.79478	8.8895	8.94805	7.72422	7.76482	8.1157	7.62567	7.64122	7.84085	7.65534	8.35617	7.76147	8.36851	8.3604	7.76347	8.49338	8.31928	8.39742	8.78934	8.12845	8.55008	8.27173	8.26695	8.21475	8.19177	9.57057	8.61094	9.04202	8.81504	9.11403	8.88291	8.59551	8.66719	8.4189	8.0462
E11 Pancreatic Progenitor	1423148_at	Skp1a	12.8243	12.945	13.0357	12.9769	12.4679	12.5273	12.8126	12.3126	12.4564	12.8427	11.4976	11.7785	11.4125	11.2246	12.4044	12.4279	12.7882	11.5005	11.3374	11.1325	11.1249	11.4403	11.5967	11.6335	11.7596	11.5115	12.5517	12.3964	12.5064	12.4203	11.9705	12.3778	12.4137	11.486	11.9118	11.9961	9.72682	11.8563	12.155	11.2228	11.2304	11.4058	11.5233	11.4905	11.4795	11.4101
E11 Pancreatic Progenitor	1417599_at	Cd276	11.5213	11.6407	11.6432	11.7438	11.0963	11.1183	11.2573	11.2484	11.0503	10.9736	10.2635	10.2713	10.1824	10.1328	10.7823	10.7963	11.0184	10.4947	10.3139	10.2701	10.5648	9.92988	10.2125	10.0045	9.39691	9.84971	10.8189	10.6202	10.5389	10.6553	10.9136	10.9673	10.9156	11.0822	10.9474	10.6553	10.4425	9.82488	10.2895	10.4296	10.3554	10.2135	10.1555	10.29	10.2664	10.008
E11 Pancreatic Progenitor	1426846_at	Cenpt	10.2507	10.3518	10.1616	10.1576	9.70698	9.65726	10.1049	9.68186	9.91232	9.57485	8.81694	8.79614	8.82867	8.93265	9.51761	9.56067	9.55111	8.80792	8.7962	8.88402	8.83455	8.60807	9.72095	8.24073	8.06938	8.99488	9.65587	9.77861	9.56337	9.69792	10.1562	9.46186	9.7115	9.57991	9.71045	9.68689	8.33418	8.23739	8.26933	7.89504	8.14651	8.51651	8.25262	7.99711	8.48019	7.61724
E11 Pancreatic Progenitor	1454663_at	Eif5	11.603	11.7496	11.8016	11.774	11.0801	11.1651	11.1616	11.4027	11.5741	11.5213	11.5948	11.5491	11.3531	11.2661	10.6372	10.73	10.913	10.5092	10.4692	10.3934	10.4175	9.92315	9.91966	10.3689	9.97345	10.2769	11.0338	10.8738	10.7966	10.8353	10.4865	10.6545	10.6078	10.2759	10.4365	10.5085	10.7223	11.1621	10.9711	10.3973	9.80806	10.2424	10.3366	10.3564	10.1326	10.2942
E11 Pancreatic Progenitor	1430183_at	4833414E09Rik	10.9148	10.8281	10.7313	10.6911	9.80138	9.66113	9.05749	9.09768	8.74463	9.38427	10.3315	9.95315	10.1001	9.84479	10.4089	10.0774	9.57863	8.93035	9.35107	9.36571	8.92864	9.03919	9.31303	10.5849	11.118	10.596	8.9737	9.64959	9.80909	9.90982	10.1978	9.75147	9.84456	9.53752	8.51356	9.37347	8.48019	9.69315	9.53539	9.64175	9.53436	9.89502	9.71263	9.41896	9.54727	9.53959
E11 Pancreatic Progenitor	1436896_at	Ints9	10.228	10.1828	10.1965	10.3625	9.9904	9.99274	10.2382	9.9649	10.1724	9.79674	8.16305	8.76801	8.62645	8.46351	9.51331	9.62448	9.83918	8.46863	8.28938	8.19967	7.8195	9.22778	9.80193	9.46247	9.20564	9.09211	9.3299	9.4089	9.3529	9.36976	9.48528	9.3335	9.45738	9.4848	9.41408	9.48858	9.94584	8.98789	9.1146	8.85567	9.16674	9.13788	9.18065	9.21171	8.95885	8.73554
E11 Pancreatic Progenitor	1450742_at	Bysl	9.4753	9.55396	9.41992	9.31479	8.73556	8.91964	8.6862	9.16742	9.43597	9.05167	7.51339	7.3123	7.8301	7.72798	8.19082	8.41714	8.70414	8.13141	8.3806	8.48596	8.05038	8.44725	8.24775	7.81797	6.92947	7.62387	8.62852	8.87309	8.68279	8.89498	7.99909	8.38287	8.33724	8.39874	8.30925	7.88314	7.71948	7.34543	8.02369	8.34186	8.32243	8.45075	8.12157	8.08905	8.0851	8.09871
E11 Pancreatic Progenitor	1449005_at	Slc16a3	8.37912	8.31397	8.25293	8.11888	6.98944	6.87153	6.87016	6.8301	7.33237	7.0682	7.11688	6.64969	6.82296	7.09729	6.85507	7.14077	6.72307	7.48062	6.40882	6.08632	6.33025	6.99518	6.21597	6.38409	6.70161	6.52429	6.30312	5.95299	6.37816	6.13049	8.86666	7.86246	8.85963	7.28073	7.67398	9.44222	7.42139	6.64083	6.1871	6.68911	6.25215	6.52686	6.58265	6.66864	6.94368	7.21974
E11 Pancreatic Progenitor	1442939_at	Rif1	10.7525	10.8567	10.9496	10.9167	10.4593	10.4974	10.3177	9.99578	10.5789	10.5493	9.92878	9.92404	9.78046	9.79274	10.2096	9.92041	10.0819	9.85374	9.85195	9.87451	10.0336	8.80704	7.74316	9.777	9.87191	10.0388	9.88774	9.95554	9.91751	9.98397	9.54634	9.96729	9.81393	9.3529	9.49494	9.60319	10.4879	9.96976	10.1671	10.112	10.1351	9.65458	9.4075	9.68939	9.53312	9.79138
E11 Pancreatic Progenitor	1455861_at	Epb4.1l5	9.91426	9.54618	9.90052	9.68939	7.78171	7.68807	7.93778	6.23056	7.07063	6.55014	8.55634	7.89508	8.48575	7.66132	7.06071	6.94967	7.43337	6.38785	6.23842	6.30644	5.84461	5.99611	6.92418	7.92205	7.60807	7.76447	7.10325	7.37229	6.81888	7.11292	7.29451	6.80141	6.92651	6.32696	6.58259	6.42183	7.60932	5.88005	6.25167	6.89559	6.91546	6.49778	7.24056	7.35167	7.58483	8.16745
E11 Pancreatic Progenitor	1447943_x_at	Yeats2	10.4697	10.4636	10.4123	10.3999	10.0784	10.0935	10.2546	10.0907	10.0216	9.92445	8.7602	9.03041	8.88468	8.37552	9.88283	9.82483	10.3418	9.82886	9.95305	9.99087	9.46543	9.45776	8.89745	9.20332	9.14375	8.74262	10.0983	10.1579	10.0521	9.96671	9.71972	9.83642	9.54788	9.70411	9.59211	9.87495	9.77658	8.49825	9.2667	8.31513	8.47732	8.76063	8.13888	8.35139	8.3313	8.00006
E11 Pancreatic Progenitor	1445606_a_at	2900009J06Rik	8.45425	8.63522	8.52256	8.42895	7.81442	7.89389	8.12086	8.01499	7.88797	7.52457	6.87968	6.87205	6.0947	6.75863	8.15052	7.96432	8.55138	6.70382	6.44196	5.76982	5.6409	7.28705	8.91731	7.513	7.03468	6.8238	7.51739	8.25821	8.09322	7.51395	7.26187	7.9118	7.93472	7.12256	7.10387	7.26292	8.37436	6.49331	6.86509	6.57962	6.52605	7.35556	6.7094	6.64825	6.73255	7.195
E11 Pancreatic Progenitor	1428164_at	Nudt9	11.192	11.2004	11.0422	11.219	11.1374	10.9295	11.1392	10.8598	11.0009	10.7107	10.1864	10.3063	10.4665	10.5068	9.79555	9.73435	10.1994	9.27559	8.84548	8.99031	8.86237	9.57615	9.73701	9.6754	9.3177	9.69709	9.79769	9.79287	9.72113	9.83869	10.4501	9.74083	10.474	10.6126	10.5798	10.5201	10.7125	10.3956	10.1652	9.58464	9.83718	10.2249	10.6415	10.6999	10.6295	10.6127
E11 Pancreatic Progenitor	1428551_at	Trmt11	9.74187	9.84162	9.63213	9.74103	9.26805	9.15336	9.16382	9.40774	9.43339	9.57825	7.98749	8.26281	8.19508	8.0766	8.76158	8.95909	8.89968	8.92668	9.1435	9.24096	8.6519	7.54858	8.41342	8.8075	8.94472	8.77013	8.9915	9.13432	9.26015	9.11689	9.03371	8.87278	9.09135	8.5898	8.84965	8.6721	6.32756	9.18364	9.03765	8.50838	8.31047	7.99555	7.72326	8.14814	8.12967	8.19524
E11 Pancreatic Progenitor	1431751_a_at	Mpped2	8.48075	8.41978	8.49915	8.46337	8.27794	8.18793	8.39428	6.30791	6.43844	6.49686	6.51967	6.83951	7.09044	6.21666	8.1114	8.14981	8.53078	7.55147	7.59545	7.51159	6.92231	7.17859	7.9698	8.54459	8.57344	8.34632	7.66583	7.89644	7.55775	7.92002	7.46157	7.7534	8.45528	6.66707	7.08217	6.90507	7.37226	6.73838	7.45441	6.97952	6.62554	7.23551	7.15369	7.57382	7.16382	7.52602
E11 Pancreatic Progenitor	1418624_at	Ybx1	13.1116	12.9521	13.0433	13.0447	12.8377	12.8018	12.9116	12.6555	12.7823	12.8159	11.4982	11.6266	11.6986	11.6159	12.2874	12.2413	12.5086	11.3689	11.4292	11.3789	11.327	10.5075	10.0995	11.2764	11.0343	11.0847	12.5619	12.517	12.5898	12.52	12.4391	12.5572	12.5804	12.4884	12.4566	12.5093	12.5561	12.3859	12.1735	11.6821	11.6537	11.7863	11.4514	11.5223	11.5407	11.5493
E11 Pancreatic Progenitor	1420545_a_at	Chn1	8.74175	8.68902	8.65306	8.80809	7.61848	7.44275	7.96362	6.19763	6.72152	6.3361	6.60119	6.69802	7.0835	6.71864	8.23337	8.33632	8.46637	7.2035	7.64093	7.0627	7.23541	7.13998	7.22359	7.66462	7.26108	6.9683	8.06113	7.89843	7.64993	7.83441	7.15748	7.91748	8.21557	7.59611	7.73014	7.44478	9.54952	8.10059	8.51798	8.0698	8.49232	8.43283	8.07538	8.56552	7.98527	8.19176
E11 Pancreatic Progenitor	1424873_at	Rnf2	11.5344	11.6349	11.6358	11.6659	11.0803	11.0523	11.2683	10.9698	10.8395	11.3394	10.9187	10.8539	10.6798	10.2775	10.8033	10.969	10.8312	10.3919	10.7253	10.7805	10.4854	8.85754	8.59452	9.81447	10.3343	10.0027	11.4362	10.7456	11.0827	11.0034	10.5635	11.0616	10.9825	10.3278	11.0207	10.8628	10.9534	11.2521	11.2244	9.80891	9.55087	9.45725	9.16081	9.30776	8.92858	9.54127
E11 Pancreatic Progenitor	1425287_at	Zfp189	7.54197	7.64146	7.74885	7.72757	7.16768	6.90419	7.39741	5.97666	6.68556	6.42175	6.31591	6.43207	6.80766	6.15525	7.22589	7.18396	7.72981	6.53306	6.56524	6.59307	6.75688	6.25138	5.2655	6.75374	7.03188	5.20553	7.06927	7.07241	6.28662	7.1175	6.86868	6.69053	6.55988	6.50327	7.05476	6.75455	5.34643	6.44316	6.53004	5.38224	5.4306	5.31276	6.66852	7.06245	6.79222	7.23389
E11 Pancreatic Progenitor	1437395_at	Zcchc11	10.0817	9.95364	9.93759	9.72079	9.47564	9.14571	9.69215	8.43153	8.15531	8.8104	8.39614	8.34072	8.26077	7.22405	9.04891	9.19022	9.20468	7.30229	7.43324	7.8159	7.49387	6.61799	6.0759	8.31895	8.09278	7.75979	9.53438	9.27231	9.23118	9.38618	8.46923	8.81149	8.87275	8.05221	8.4326	8.78638	6.41067	8.8828	8.70503	7.45995	7.75675	7.29327	7.32202	7.28468	7.09938	7.42845
E11 Pancreatic Progenitor	1433952_at	Tufm	10.168	10.2045	10.1123	10.1853	9.93531	10.0433	9.89085	10.4373	10.5611	10.0491	8.66285	8.89402	9.47978	8.03081	9.44764	9.38091	9.66646	8.33411	8.25706	8.22967	7.90504	9.04035	8.98792	7.16332	7.3408	7.68169	9.21129	9.51922	9.26078	9.52017	9.53804	9.31755	9.29287	9.17645	9.18279	8.77651	9.35105	8.57589	8.80618	9.00377	8.56088	9.46947	9.25816	8.95202	8.22779	8.77342
E11 Pancreatic Progenitor	1460164_at	Spin1	9.23548	9.35858	9.14305	9.31446	8.98164	8.70819	9.69296	8.18717	8.22962	8.79638	8.36842	8.61007	8.39221	7.78364	8.81688	8.30026	8.85512	8.41781	7.78212	8.28562	8.30246	5.71689	7.0729	7.5592	7.68189	7.39443	8.69565	8.07908	8.53595	8.1001	8.49971	8.86408	8.32076	7.50188	8.4131	8.47048	8.51173	8.12837	8.1526	7.23987	7.25171	7.91654	6.95508	7.61261	7.17563	7.43254
E11 Pancreatic Progenitor	1433467_at	Slc7a6	10.5457	10.7083	10.5937	10.4653	9.86641	9.86967	9.6178	9.9168	10.3069	10.1049	8.75024	8.37097	8.57843	8.27326	9.11091	8.99319	9.35222	9.81002	9.91797	9.88231	10.0219	10.5725	10.2597	10.0262	10.3163	10.3256	9.50972	9.33174	9.4478	9.47689	8.46851	9.38074	9.33685	8.98302	9.10637	9.1742	8.64629	9.12388	9.25165	9.34404	9.1413	9.30036	9.12655	9.11287	9.18493	9.15116
E11 Pancreatic Progenitor	1426167_a_at	Camk4	8.56218	8.37683	8.17354	8.38672	6.47528	6.6961	5.88026	7.12935	8.1689	7.92791	5.81268	5.01178	5.99412	5.47711	6.11624	5.95895	6.28996	7.13501	5.87727	5.57476	7.00789	7.6381	5.48302	7.02098	6.15247	5.92888	6.70831	6.29324	6.42752	6.57259	7.32376	6.88475	7.26032	7.18882	7.63226	6.86646	7.6479	7.11528	6.55807	5.60625	6.30363	6.71766	5.76015	5.75205	6.20988	5.13037
E11 Pancreatic Progenitor	1454944_at	Hic2	8.52027	8.41063	8.30698	8.58084	6.89556	6.99993	7.42412	7.01706	7.35827	6.69099	7.13842	7.11622	7.14156	6.66916	6.36513	6.20284	6.90107	5.59741	6.17566	6.24311	6.67588	6.66798	6.58433	6.27317	5.96758	5.78717	7.22325	6.86716	6.90457	7.14343	6.07232	6.66566	6.17067	6.5744	6.8516	6.75633	7.28942	5.95278	6.32379	6.41549	6.66298	6.04852	6.38629	6.12283	5.98212	6.52674
E11 Pancreatic Progenitor	1423852_at	Shisa2	11.1492	11.1639	11.0943	11.2581	10.8826	10.7672	10.3384	10.4822	10.4924	10.4946	9.27595	9.74844	9.17142	9.15972	10.6995	10.6608	10.9288	10.8712	9.90467	10.6253	10.9696	8.92978	7.32256	8.77994	9.76427	9.05275	10.4934	10.7285	10.5816	10.3349	10.02	10.1503	10.2459	9.11142	9.60395	9.87228	10.8373	10.2419	10.6183	10.0646	10.4204	9.96676	9.56322	9.71848	9.77134	9.37216
E11 Pancreatic Progenitor	1420477_at	Nap1l1	12.6406	12.7896	12.7987	12.644	11.9814	11.9853	12.0626	11.8723	12.1638	12.2921	11.2695	11.3105	11.4021	11.2591	11.6209	11.7081	11.6436	11.8887	12.116	12.0592	12.0366	10.9788	10.958	11.6817	11.5234	11.4703	11.8906	11.8196	11.7502	11.928	11.4782	11.7962	11.7826	11.741	11.7254	11.6295	9.90077	11.8412	12.3022	11.8516	11.6561	11.8666	11.4465	11.5311	11.6046	11.5431
E11 Pancreatic Progenitor	1450423_s_at	Rpf2	10.2246	10.26	10.5043	10.3649	9.63701	9.94398	9.89195	9.85523	10.6152	10.2749	7.62082	7.4448	7.51002	7.13287	9.59143	9.61117	9.81679	8.55008	9.00537	8.93022	8.59288	8.46389	8.6419	8.75451	8.5556	8.77864	9.95811	9.6268	9.69396	9.65641	9.7238	9.27451	8.72479	8.952	9.05589	8.87044	7.43227	8.25558	8.6072	8.4775	8.1227	8.30093	8.30102	8.18894	7.95474	8.05324
E11 Pancreatic Progenitor	1418210_at	Pfn2	12.1078	12.249	12.2474	12.2318	11.878	11.6002	11.9156	10.1199	10.0164	10.593	9.93189	10.2471	9.84595	9.72485	11.8759	12.0104	11.918	11.52	11.6876	11.8006	11.8034	10.0271	10.1998	10.8465	11.3235	11.4605	12.1907	12.0832	11.8218	11.911	11.2301	11.5178	11.452	10.7292	11.1377	10.9132	11.9375	10.8173	11.3058	10.5683	10.3548	9.86281	10.074	10.9073	10.308	10.1249
E11 Pancreatic Progenitor	1420381_a_at	Rpl31	11.7918	11.9851	11.8084	11.9446	11.4455	11.568	11.3876	11.6208	11.9827	11.8362	9.95639	10.1133	10.4329	9.9851	11.2032	11.3464	11.3391	10.6462	10.7617	10.6302	10.3883	11.2231	10.9973	11.2603	11.2515	11.1048	10.72	10.8737	10.8996	11.0863	10.8952	11.1742	11.0993	10.7451	10.4704	10.7406	9.55072	10.1842	10.6942	10.3234	9.93838	10.3393	10.4704	10.4392	10.3472	10.0215
E11 Pancreatic Progenitor	1423545_a_at	Zfp207	12.327	12.4252	12.4718	12.4911	12.227	12.181	11.9083	11.562	11.7175	11.9046	11.1231	11.2873	11.4058	11.2822	12.2478	12.1402	12.1895	11.426	11.4473	11.5237	11.6944	9.3018	9.27883	10.6218	10.849	10.9353	11.9643	11.8738	11.7548	12.0548	11.5322	11.5369	11.5964	11.2155	11.5863	11.4876	11.8905	11.8208	11.6523	11.1563	11.0427	10.0864	10.5646	11.0433	10.8135	10.6775
E11 Pancreatic Progenitor	1453067_at	Apitd1	10.2146	10.3878	10.0997	10.1999	9.95907	9.91697	9.89776	9.73273	10.2059	9.70126	7.53083	7.74481	7.69855	7.74137	8.74889	8.47574	9.09958	8.98563	9.62253	9.51341	9.00765	8.4253	7.94707	9.2967	9.40599	8.43293	8.91489	9.19209	8.47094	9.099	8.7755	9.14475	9.06495	9.43346	9.25955	9.13476	9.37543	8.47834	8.50474	8.48426	8.36935	8.63328	8.77106	8.54858	8.79566	7.74791
E11 Pancreatic Progenitor	1416145_at	Dhx15	12.5122	12.6143	12.664	12.4578	12.1579	11.9879	12.2846	11.7498	11.9282	12.0262	11.7957	11.7351	11.7758	11.3292	12.1114	12.2446	12.3802	11.411	11.5592	11.563	11.5245	10.45	10.4179	11.1085	11.1624	11.0777	12.055	11.9341	11.885	11.8953	11.5969	11.8165	11.8143	11.5973	11.7632	11.7352	11.1011	11.8912	11.6915	10.8777	10.7322	10.7063	10.3451	10.6603	10.6129	10.8003
E11 Pancreatic Progenitor	1437071_at	Eif1ay	10.0043	10.1192	9.8919	9.94055	9.54991	9.58797	9.38218	9.709	9.91616	9.93329	9.61386	9.35744	10.2116	9.85701	8.55716	8.71749	9.07576	9.32398	9.3789	9.58088	9.49507	7.8758	8.68417	8.77093	8.38955	8.15093	8.84815	8.87662	8.48822	8.69015	8.38046	8.97954	8.41815	9.02848	9.14135	8.43171	7.97168	8.37802	8.38571	8.0954	8.30562	7.8446	7.73496	7.94729	8.17615	7.64465
E11 Pancreatic Progenitor	1450269_a_at	Pfkl	11.1944	11.2302	11.1525	11.3518	10.9499	10.829	11.4161	10.9881	10.7428	10.6541	8.9751	9.49611	9.39851	9.41145	9.83822	10.0202	10.0228	8.72113	8.45408	8.40787	8.81776	8.94402	8.63061	9.63743	9.20111	9.04321	10.1696	10.2383	10.3178	10.6686	10.7103	10.6087	11.395	9.91754	9.73849	10.8423	11.4689	9.82195	10.274	10.2425	10.4663	10.3743	9.90827	9.869	9.64735	10.0422
E11 Pancreatic Progenitor	1456651_a_at	Tpr	9.74149	9.74618	9.90953	9.8635	9.38041	9.31278	9.66731	9.67322	9.7567	9.80285	9.34923	9.4994	9.84275	9.18813	8.94846	8.85939	8.9449	8.64387	8.85933	8.36516	8.22093	8.26651	7.9795	7.58434	7.8853	7.98151	9.06496	8.79318	8.50135	8.65748	7.96177	8.23613	8.48263	9.16045	9.09798	8.78311	9.98918	9.22371	8.69908	8.36624	8.64939	8.78085	8.14841	8.48795	8.42444	7.54343
E11 Pancreatic Progenitor	1435099_at	Utp14a	10.3306	10.2654	10.1311	10.3176	9.75236	9.93359	9.69943	10.0302	10.519	10.1375	9.62942	9.7492	9.91214	10.0299	9.09769	9.28078	9.77325	8.39144	8.2964	8.26857	8.17206	9.22579	9.49035	8.97168	8.88891	9.08155	8.72137	9.10277	8.81826	9.06959	9.6491	9.02513	9.54179	9.62629	9.42803	9.07809	9.05591	8.9838	9.15614	8.90406	8.98194	9.51055	9.23023	8.95006	8.85821	8.38416
E11 Pancreatic Progenitor	1435044_at	Ebf4	8.57822	8.48128	8.35421	8.34854	7.12203	6.8355	7.3209	6.07531	5.97035	6.21175	7.55163	7.57112	7.82846	7.80822	7.92192	7.91856	7.74776	6.54226	7.34973	6.89174	6.23389	8.1903	8.36786	6.94051	7.04509	6.97369	8.07247	8.40967	7.69666	8.30794	7.78546	7.61215	7.64402	7.51456	7.51021	7.62675	6.86755	5.97253	5.49446	6.80181	6.48761	6.76662	6.60487	6.65849	6.95533	6.37658
E11 Pancreatic Progenitor	1437307_at	Senp8	8.3482	8.06859	8.22503	8.17277	7.20149	7.14718	7.02538	6.70297	6.91637	6.99597	4.60273	4.80737	4.56826	4.48508	7.67437	7.29852	7.44415	6.09841	6.49275	6.18968	6.53657	6.3052	7.08756	7.52864	7.78604	7.40644	7.45516	8.23892	8.20476	7.8562	6.12942	7.06371	7.9953	5.99005	6.3366	6.45001	6.30954	6.57225	7.45885	6.62742	6.87533	6.80129	6.56994	6.67317	6.50358	7.29325
E11 Pancreatic Progenitor	1449673_s_at	Tufm	11.4243	11.4281	11.3361	11.3566	11.2313	11.3831	11.0821	11.6538	11.7167	11.192	9.61734	10.0601	10.6072	9.51012	10.6755	10.6674	10.9327	9.59938	9.4929	9.64369	8.93613	10.4622	10.5459	8.4962	8.83945	8.89854	10.3698	10.818	10.5466	10.7324	10.9229	10.5257	10.6934	10.452	10.411	10.2119	10.6234	9.7964	9.76344	10.1955	9.86242	10.7732	10.5292	10.2138	9.72375	10.0259
E11 Pancreatic Progenitor	1416621_at	Llgl1	10.142	10.1765	10.1224	10.2031	10.0062	9.61168	10.685	9.92283	9.86645	9.70869	8.99586	8.97436	8.52321	8.59009	9.83559	9.93684	9.96259	7.96255	8.33452	7.8155	7.61484	8.27104	8.14511	8.11219	7.72066	7.8433	9.57686	9.16202	9.10713	9.30022	9.43213	9.52146	9.68972	9.82138	9.96892	9.8862	9.41022	8.6029	8.65775	8.12592	8.28809	8.46369	8.10353	8.03859	7.68825	8.11504
E11 Pancreatic Progenitor	1423733_a_at	Fiz1	11.473	11.5332	11.3259	11.3805	11.0341	10.9767	11.0748	11.0941	11.3037	10.7914	10.7804	10.9052	11.1797	11.0325	10.6247	10.8999	11.0804	9.74753	9.80944	9.4402	9.34752	10.5901	11.0452	10.4711	10.4042	9.91229	10.3453	10.5621	10.3333	10.3751	10.3436	10.1237	10.3601	10.407	10.0924	10.076	8.57311	9.37416	9.64422	10.3959	10.3417	10.7868	10.4511	10.2001	10.0445	10.0823
E11 Pancreatic Progenitor	1417099_at	Ftsj1	11.9062	11.8735	12.0166	11.787	11.0013	11.126	10.9696	11.3089	11.5958	11.3306	9.93425	10.3881	10.1846	10.3181	11.7117	11.7699	11.9461	10.5273	10.6042	10.3999	10.1848	10.9128	11.0526	10.6575	10.4756	10.4261	11.6174	11.9437	11.7174	11.6936	10.8096	11.3297	11.1048	10.583	10.5869	10.5068	10.7843	10.4315	10.2968	10.3585	10.4483	10.5857	10.548	10.4433	10.6854	10.6184
E11 Pancreatic Progenitor	1418515_at	Mtf2	11.3116	11.6016	11.5101	11.4869	10.9632	10.8542	10.8784	10.5599	10.409	10.9034	9.73841	9.82622	9.41317	9.39878	11.3727	11.254	10.8707	10.254	10.7718	10.9229	10.4957	9.17487	9.71909	10.1239	9.97585	10.1845	10.9447	10.7069	11.0302	10.5022	10.0375	10.2125	10.6376	9.59779	10.2049	10.088	6.9544	9.72416	10.1912	9.11601	8.91866	8.66685	8.6673	9.07171	8.88808	9.26057
E11 Pancreatic Progenitor	1448230_at	Usp10	12.117	12.1468	11.9296	12.0224	11.9519	11.9841	12.0017	11.8501	11.8906	11.5541	10.9951	10.9689	11.1289	11.2196	11.0983	11.193	11.4926	9.9775	10.1043	9.95472	9.75156	11.1498	11.1543	10.9951	11.002	10.6902	10.842	11.1275	11.1433	11.0666	10.8621	10.7841	10.8135	11.1304	11.0032	10.89	11.2495	10.4285	10.5632	10.6529	10.6112	10.8392	10.8426	10.7727	10.5926	10.5203
E11 Pancreatic Progenitor	1428096_at	Ipo11	12.5272	12.4904	12.2639	12.4328	12.3072	12.1914	11.9375	11.722	12.3139	12.0303	11.1194	11.2704	11.0821	11.1533	10.7558	10.8452	11.0413	11.9734	11.4045	11.4635	11.6096	10.8479	11.0399	10.9424	10.9971	10.9974	10.7818	11.0659	10.6608	10.5002	11.4566	11.1407	11.1292	11.0269	11.3435	11.3833	10.1352	10.8991	10.2994	10.3854	10.4435	10.4226	10.6414	10.6341	10.4708	10.5826
E11 Pancreatic Progenitor	1426411_a_at	Strbp	9.79227	9.89616	10.0658	10.0293	9.14919	9.17079	9.39886	9.13943	9.51073	9.43713	7.80855	8.30117	8.17276	7.70382	9.30836	9.55278	9.75157	8.06777	8.08645	7.8867	7.64699	7.55627	7.71309	8.06971	7.8993	7.77888	9.36336	8.99895	8.94677	9.07545	8.41243	8.77915	8.95384	7.99206	8.1798	8.26368	9.47677	8.91566	9.01947	8.28913	8.09343	8.26394	8.09234	8.21641	8.30753	8.6702
E11 Pancreatic Progenitor	1421343_at	Bach2	10.0175	9.866	9.79473	9.69162	8.99935	9.03425	8.461	8.80928	9.4532	9.53695	8.00722	8.01809	8.02152	7.88676	8.17331	8.11305	8.67097	7.74402	8.15839	7.25335	7.72489	7.48991	7.01704	7.865	8.22505	7.74411	8.35069	8.47963	8.02968	8.22991	7.58778	8.13638	8.01319	7.47058	7.81462	7.69871	7.47453	7.72384	7.97687	7.7337	7.84442	7.73819	7.45569	7.49898	7.40294	8.02323
E11 Pancreatic Progenitor	1448328_at	Sh3bp2	9.18684	9.15056	9.03779	9.23779	8.45412	8.47253	8.87023	8.23236	8.30007	7.88841	10.1848	9.24685	9.09178	9.53766	8.48452	8.27963	8.92736	7.19536	7.45701	6.94418	6.80532	7.75912	7.67328	7.4089	7.07357	7.00197	7.67577	7.24682	6.616	7.1612	8.05166	7.69404	7.46768	8.12424	8.1729	8.18729	7.34516	7.96397	7.01183	6.84844	7.02177	6.95693	8.97397	8.13904	8.07372	8.66209
E11 Pancreatic Progenitor	1438256_at	Eif5a2	7.95698	7.94448	7.74606	7.76934	7.23148	6.84207	7.6179	5.98804	5.62707	6.1739	5.54047	6.49366	6.12892	6.3454	5.9576	6.38695	7.17783	7.16059	6.5738	5.97737	6.68857	6.04698	6.17025	6.52742	5.6959	6.29357	7.50072	7.8514	7.11055	7.22076	6.32676	6.54289	6.86095	6.04884	7.05908	6.52472	7.04386	6.43547	6.85593	6.98514	6.24723	6.74387	6.34682	7.013	7.14183	6.85471
E11 Pancreatic Progenitor	1429739_a_at	Patz1	10.6205	10.8336	10.7937	10.764	10.4051	10.2639	10.6915	10.1318	10.0733	10.0252	9.2037	9.3514	9.1558	8.92019	10.3701	10.4794	10.5199	9.92469	10.0442	10.0456	9.88621	9.95497	10.2692	9.61754	9.70182	9.58637	10.0953	10.2718	10.1506	10.2142	9.54095	9.90693	10.084	9.75097	9.57634	9.5942	8.17474	9.07445	9.53354	9.50962	9.48033	9.42826	9.15416	9.27684	9.02429	8.92127
E11 Pancreatic Progenitor	1452665_at	Ttc27	9.82782	9.94309	9.99138	10.0893	9.69403	9.93007	9.79317	10.2768	10.6625	10.0721	8.73358	8.85246	8.92782	8.96328	8.60314	8.88919	9.20558	8.38529	8.64437	8.14931	8.15795	9.02813	8.89181	8.19562	8.5358	8.44126	8.91072	8.95605	8.7888	8.82549	8.4453	8.2674	8.52489	8.89293	8.78593	8.55037	8.53742	8.44504	8.55874	8.47171	8.1724	8.78994	8.1797	8.23657	8.11375	7.6354
E11 Pancreatic Progenitor	1417844_at	Med4	10.9982	10.9027	10.7801	10.9084	10.3774	10.3102	10.3706	10.0452	10.3353	9.90062	10.1208	9.92618	10.3829	10.2809	9.83012	9.66123	10.0806	9.78807	9.93146	9.54838	9.14829	9.79205	9.83022	9.49532	9.4249	9.21656	9.39079	9.78094	9.5139	9.59399	9.78032	9.67366	9.68772	9.83299	9.66543	9.51334	9.88357	9.31071	8.989	9.31795	9.55896	9.79202	9.61555	9.35246	9.43208	9.14211
E11 Pancreatic Progenitor	1426675_at	Tomm70a	11.6725	11.8508	11.8445	11.7397	11.0897	11.3112	11.1356	11.4094	11.3388	11.6795	9.99292	9.87536	9.89427	9.96778	11.1501	11.0728	11.1256	10.9702	11.1539	11.2557	11.1995	10.79	9.56108	10.5864	10.5189	10.7425	11.4798	11.3983	11.2744	11.3249	10.3531	10.9976	10.512	10.5827	10.8962	10.7053	7.67355	10.5714	10.9324	10.3746	10.3819	10.1396	10.3096	10.4287	10.4337	10.8616
E11 Pancreatic Progenitor	1424894_at	Rab13	10.4701	10.5573	10.5158	10.6378	10.4885	10.1455	10.3	9.24026	9.98251	9.49312	10.0744	10.3826	10.3858	10.364	9.29738	9.17217	9.73397	10.5387	9.9226	9.62964	10.216	9.02626	9.70602	9.21548	9.08181	9.01864	8.84159	8.44699	8.01814	8.85868	10.2074	9.52631	9.98042	10.3052	10.2706	10.3719	8.52084	9.10809	8.32881	8.17536	8.24137	8.6836	9.11194	9.29474	8.95807	9.4169
E11 Pancreatic Progenitor	1423143_at	Gtpbp4	11.464	11.5622	11.4544	11.6828	10.7753	10.9738	10.8021	11.0257	11.3641	11.2784	10.7349	10.1485	10.4684	10.6025	10.7172	10.7827	11.0006	9.92737	10.0892	10.1468	10.0803	8.87847	9.27938	10.1849	9.93694	9.72621	10.508	10.4543	10.4934	10.5159	9.88793	9.93747	9.7159	10.3003	10.3711	10.0147	11.2151	10.2594	10.4336	10.3357	10.5667	10.2439	10.1826	10.124	10.1063	10.0923
E11 Pancreatic Progenitor	1426482_at	Prkrir	10.2081	10.1204	10.3489	10.2819	9.84509	9.89257	9.99104	9.93269	10.2539	10.1093	9.41071	9.15522	9.32485	9.03084	9.131	9.10041	9.40153	9.12641	9.46017	9.29505	9.21912	8.67816	8.77671	8.33947	7.88177	7.80512	9.20529	8.86097	9.01313	8.93828	9.13385	9.06093	8.73865	9.70511	9.79727	9.42044	9.6176	9.43997	9.58222	8.93817	9.03604	8.92954	9.07976	8.98544	8.6844	8.48528
E11 Pancreatic Progenitor	1431665_a_at	Timm8b	12.0066	12.0327	11.8677	11.9262	11.6507	11.5881	11.6898	11.7905	11.6051	11.4362	10.1219	10.3573	10.1272	10.1326	11.4658	11.5036	11.9994	10.1539	10.156	10.0283	9.76587	10.4251	10.4199	10.1357	10.2278	9.85412	11.2098	11.9479	11.782	11.793	11.2245	11.3336	11.508	11.135	11.2441	11.3098	11.8535	10.841	11.1379	10.223	10.5043	10.6643	10.9219	10.9587	10.9415	10.914
E11 Pancreatic Progenitor	1420110_s_at	Zfp334	9.73316	9.73828	9.48489	9.74121	8.26994	8.18863	8.55921	7.74971	7.79605	7.53502	6.85637	7.1162	7.04019	7.44653	8.70133	8.99531	8.90431	8.02056	8.05503	8.28567	8.35768	8.74721	9.33027	8.71454	8.38333	8.19203	8.50813	8.3378	8.64675	8.7149	8.95281	8.18434	8.91723	8.24221	8.25387	8.10331	9.56845	7.89237	8.18613	7.91923	8.63537	8.66972	7.96886	8.01953	7.94307	7.36615
E11 Pancreatic Progenitor	1423801_a_at	Aprt	11.8548	11.7537	11.5733	11.6982	11.2209	11.2576	11.1665	11.588	11.6037	11.3274	10.1046	10.1209	9.97144	10.2767	10.195	10.1549	10.3508	9.41682	9.3601	9.13582	9.40832	9.96784	10.0974	9.96091	9.59753	9.87643	10.7254	10.8921	11.0049	11.2016	11.3385	11.0748	11.3028	10.957	11.1171	11.0845	10.6606	10.2248	10.4307	10.0518	10.3454	10.3024	10.3459	10.3721	10.3152	9.94146
E11 Pancreatic Progenitor	1454060_a_at	Nras	10.9489	10.9372	11.1464	11.0473	10.6254	10.6601	10.7623	9.54079	9.94518	10.1145	10.0475	10.2226	10.1774	9.9791	10.4732	10.6262	10.801	9.8595	9.83353	9.99301	9.83358	7.55414	7.26939	8.35854	8.39001	8.48822	10.4215	10.6176	10.531	10.3777	10.15	10.3413	9.9916	9.71965	10.2587	10.0216	8.17536	9.91501	9.63176	8.88737	8.4314	8.06027	8.35728	8.72285	8.61791	7.9274
E11 Pancreatic Progenitor	1428052_a_at	Zmym1	10.4923	10.3509	10.2379	10.3636	9.71534	9.6598	9.68533	9.576	10.0308	9.76784	8.80243	8.76464	9.12871	8.73979	9.21404	9.39398	9.5868	9.26035	9.54482	9.15778	9.3316	9.99007	10.4594	9.63747	9.91662	9.28864	9.26607	9.22453	9.60763	9.41478	9.38942	9.46902	9.18944	8.94589	8.81905	8.76389	6.24317	8.86122	9.21059	9.06567	9.14468	8.94507	9.188	9.26288	9.10181	9.2493
E11 Pancreatic Progenitor	1440037_at	Pbx1	11.0207	10.7792	10.9495	10.8246	10.069	9.82127	9.26745	9.07463	8.84251	9.67286	10.7223	10.2196	10.1774	9.78457	10.6798	10.3623	9.72261	8.63961	9.46664	9.31476	9.45605	8.50698	8.96875	10.3137	10.8967	10.4444	9.04413	9.74663	10.3519	9.56949	11.5472	10.5031	10.3744	9.22666	8.29811	9.48717	10.3328	10.2199	9.87051	9.64414	9.17639	9.12365	8.93291	9.07624	9.16336	9.14733
E11 Pancreatic Progenitor	1451080_at	Usp1	11.7386	11.7686	11.5501	11.6181	11.611	11.5214	11.6415	11.5036	11.6194	11.632	10.6541	10.6713	10.3838	10.4395	10.1727	10.5747	10.7732	11.1019	10.9364	10.6813	10.8316	10.5516	10.2536	10.0572	10.1088	9.63078	10.1961	9.99048	10.4324	9.88617	10.6343	10.5093	10.1018	10.7479	10.6462	10.5743	8.58163	10.449	10.2928	10.7084	10.5854	10.723	10.5906	10.6948	10.6047	10.6739
E11 Pancreatic Progenitor	1428301_at	Gm8348	12.807	13.008	12.9274	12.8131	12.5692	12.2464	12.4085	12.208	12.0231	11.9156	11.8191	11.3045	12.019	11.8591	12.6439	12.7973	12.6722	12.7186	12.5164	12.5386	12.2107	12.1603	11.1677	11.2923	11.9084	11.6953	11.2342	11.2474	11.7425	11.5737	11.8906	11.794	11.3698	12.1076	11.9189	11.5631	11.7448	10.905	10.7788	11.8575	12.1458	12.0281	11.6899	11.5378	11.9682	10.9517
E11 Pancreatic Progenitor	1423061_at	Arvcf	9.04884	9.19661	9.19147	9.02849	8.51036	8.12904	8.67611	7.20763	6.97975	6.92595	7.76666	7.5426	8.05533	7.1783	9.08011	9.21622	9.60265	7.56751	8.31342	8.1064	7.59423	8.03773	7.96529	7.82623	7.18459	7.50346	9.08819	8.76438	8.63796	9.02695	8.68164	8.83096	9.1616	7.9722	7.98222	7.89318	9.14194	7.12107	7.4315	7.05748	7.01343	7.21534	6.91151	7.12868	7.14413	7.05116
E11 Pancreatic Progenitor	AFFX-GapdhMur/M32599_5_at	Gapdh	13.0197	13.1753	13.2289	13.2508	13.1273	13.0817	13.0299	13.0352	12.9722	13.0982	11.422	11.6297	11.3306	11.3922	12.0199	12.104	12.4483	11.137	11.2215	11.5519	11.6154	11.3859	10.2638	11.8421	11.9648	12.2266	12.4907	12.4827	12.5548	12.6835	12.1648	12.5835	12.6343	11.7369	12.2899	12.6223	12.4516	12.256	12.3155	11.7432	11.8294	10.9978	11.7182	11.9474	11.5077	11.3314
E11 Pancreatic Progenitor	1433565_at	Prpf38a	11.9488	12.1564	12.016	12.1538	11.7056	11.7152	11.6314	11.7408	11.6818	11.8383	11.0917	11.1032	11.1877	10.9498	11.2716	11.3818	11.5756	10.926	11.1694	11.0548	10.7708	10.1302	9.80876	10.658	10.505	10.431	11.1066	11.3029	11.1507	11.3269	11.0451	11.2851	11.2572	10.7678	10.8975	10.8318	11.628	11.0228	10.9946	10.4166	10.5285	10.3863	10.1959	10.3643	10.1109	10.1491
E11 Pancreatic Progenitor	1441051_at	Trim27	7.69299	7.85144	7.69258	7.90459	7.73105	7.52421	8.08535	7.43666	7.7941	6.76299	6.66972	6.80119	6.87041	7.00688	7.15834	7.21166	7.69587	6.04928	7.05751	6.7729	6.07381	6.1218	5.45081	5.71862	6.10594	5.62034	6.45225	6.46229	6.54719	6.80765	6.91715	6.96516	6.39651	7.6015	7.71178	6.75241	5.52622	5.4341	5.72397	6.41418	6.44605	6.52171	5.67381	5.66519	5.92804	5.54698
E11 Pancreatic Progenitor	1458273_at	Hnrnpd	7.61664	7.69192	7.66471	7.47925	6.60818	6.73524	6.74731	6.48321	6.71918	6.54027	7.30815	6.90577	7.24273	6.68404	6.84462	6.86447	6.74528	6.72941	7.83363	7.78158	7.00484	5.77855	7.18425	7.31249	7.37134	7.37335	6.65443	7.02171	7.0601	6.73325	6.47099	7.09594	6.85255	5.80548	6.03923	5.9789	5.42238	6.14546	6.54547	6.21859	5.41713	5.68491	5.96413	5.83664	5.47246	5.95276
E11 Pancreatic Progenitor	1460279_a_at	Gtf2i	10.4473	10.5693	10.6035	10.6777	10.3765	10.1695	10.535	9.81884	10.0709	9.8251	9.21254	9.53752	9.42919	9.33058	10.1206	10.1698	9.95678	8.95128	8.65506	8.77258	8.81639	8.85464	7.61662	8.99477	8.97267	8.51278	10.2163	9.83393	9.84115	10.1763	9.60557	9.68755	9.91292	9.54021	9.88251	9.92777	10.3104	9.4924	9.59076	9.71861	9.87308	9.3074	9.54854	9.9446	9.39181	9.39144
E11 Pancreatic Progenitor	1435995_at	Mrpl22	12.0799	12.0711	11.8675	11.9444	11.6616	11.7306	11.5719	11.7135	11.9155	11.6819	9.73022	10.0752	9.82991	10.2544	11.3184	11.2697	11.8121	10.5552	10.5506	10.5325	9.9849	10.8182	10.9873	10.8539	10.7459	10.7053	10.9834	11.4501	11.424	11.5087	10.874	11.0396	11.3095	11.1008	10.9925	10.8439	10.2977	10.6564	10.9334	10.6176	10.9634	10.9377	10.7288	10.8807	10.9175	10.2271
E11 Pancreatic Progenitor	1423313_at	Pde7a	10.1368	10.3097	10.0581	9.95537	9.01207	8.96837	9.04319	8.56795	8.52511	8.51909	8.94605	9.10512	9.04558	8.77214	9.08696	9.14516	9.32804	8.53587	8.29153	8.11368	8.19589	7.38905	8.31201	8.49378	8.11237	7.92364	7.57883	7.99694	7.78106	7.75711	7.89034	8.3878	8.04162	7.65946	7.5671	7.51142	7.65269	7.93682	7.83214	7.38286	7.5773	7.72006	8.04627	7.63637	7.93706	7.29552
E11 Pancreatic Progenitor	1448913_at	Smarcd1	9.25888	9.42356	9.14897	9.36768	8.65682	8.53261	9.31948	9.0493	9.01413	8.67289	7.38055	7.36805	7.60193	7.30252	8.32647	8.52739	8.56277	7.14154	7.50268	7.4889	7.20244	7.47632	7.49606	7.7058	7.58487	7.59877	8.49334	8.24391	8.28139	8.4116	8.27743	8.08972	8.19802	8.46781	8.97241	8.75078	9.44019	7.81025	7.94506	7.61757	7.52403	7.51121	7.66197	7.38298	7.5585	7.7178
E11 Pancreatic Progenitor	AFFX-GapdhMur/M32599_M_at	Gapdh	13.5001	13.5625	13.6679	13.7467	13.4002	13.3733	13.4573	13.4357	13.3136	13.3952	11.642	11.9609	11.6649	11.7664	12.2091	12.4381	12.7915	11.3564	11.6324	11.7488	11.6341	12.3456	12.044	12.2317	12.1001	12.3892	12.7748	12.6856	12.8368	12.9926	12.7811	12.9858	13.0839	12.4947	12.6931	13.0471	12.8759	12.7266	12.6975	12.3138	12.3844	12.074	12.4778	12.4466	12.0396	12.0052
E11 Pancreatic Progenitor	1419606_a_at	Tnnt1	8.58581	8.35957	8.30383	8.54318	6.65877	6.93711	6.38579	6.6825	6.78188	6.26656	7.48145	6.96469	6.679	6.70198	6.3313	6.57819	7.0382	6.91186	6.44367	6.24422	6.64619	6.47663	6.28456	6.43338	6.38661	6.19988	7.04689	5.94255	6.27199	6.29584	6.94934	7.00219	6.80798	7.50257	7.85684	7.51284	7.1687	6.22431	5.59352	5.9779	5.78378	5.84256	5.75252	6.24396	6.83799	6.99688
E11 Pancreatic Progenitor	1438466_at	Dnahc7b	8.30513	8.43093	8.34811	8.4927	8.09774	8.04424	8.64284	6.44279	6.44095	6.5601	7.84105	7.58988	7.90231	7.39036	6.39495	6.3709	7.08288	7.99354	7.99574	8.3892	7.98342	7.35795	8.90028	7.39771	7.09145	7.62795	7.65706	7.84796	7.6702	7.6292	8.05964	7.3989	7.7171	7.6448	7.66114	7.39228	7.44842	6.03847	6.75828	5.80063	7.16864	6.63758	7.01905	6.96662	6.38623	6.20405
E11 Pancreatic Progenitor	1422675_at	Smarce1	12.3172	12.276	12.2405	12.4722	12.1476	12.0569	12.3208	11.7672	11.8861	11.6367	10.8817	10.9693	11.2538	11.3418	12.2295	12.1912	12.1443	10.8127	11.2178	10.9291	10.2447	11.1744	10.3821	10.6024	11.0439	10.7337	11.5195	11.435	11.5091	11.2142	11.4022	11.5143	11.2425	11.5777	11.7611	11.4612	12.0604	11.3914	10.8475	11.0439	10.8857	10.8539	10.6406	10.5186	10.5	10.821
E11 Pancreatic Progenitor	1430019_a_at	Hnrnpa1	13.0522	13.075	13.0634	13.0941	13.0126	12.7559	13.139	12.7483	12.8588	12.8824	12.4637	12.5964	12.4843	12.5153	12.801	12.6279	12.7472	12.2564	12.0027	12.2545	12.0429	11.1777	11.3445	11.0332	10.8192	11.2892	12.252	11.6903	12.0522	11.5685	12.4981	12.7012	12.6976	12.4902	12.5005	12.4908	11.1066	12.5856	12.306	11.6881	11.0353	10.7669	10.7227	11.17	10.7381	10.5997
E11 Pancreatic Progenitor	1421624_a_at	Enah	11.2415	11.0778	11.0129	11.1877	10.9922	10.8698	11.3148	9.74376	9.82022	9.75287	10.0973	10.3557	10.3495	10.1414	10.2843	10.3564	10.5771	9.77573	9.97326	9.98965	9.99287	9.53825	11.2295	10.2106	10.0695	10.0191	9.70709	9.89934	10.0786	9.89643	9.81634	10.0909	10.0782	9.49973	9.52816	9.56234	10.8541	9.42289	9.29824	9.65512	9.47662	9.88933	9.88994	9.68002	9.54536	9.86562
E11 Pancreatic Progenitor	1437046_x_at	Fam63a	11.2419	11.1052	11.0044	11.1969	11.0658	11.0708	11.1257	10.8515	10.8139	10.3943	10.5189	10.4828	10.4528	10.5357	10.3547	10.3691	10.5529	9.65129	9.53559	9.23796	9.17242	9.92665	10.2793	9.29673	9.34997	9.31716	10.0107	9.91937	9.86485	9.9094	10.2259	9.78633	10.0598	10.3709	10.2854	10.1041	10.6924	9.13497	9.44722	9.88725	9.77893	10.0919	9.79142	9.65052	9.72514	9.57969
E11 Pancreatic Progenitor	1417949_at	Ilf2	11.8442	11.7995	11.9733	12.0345	11.4739	11.4231	11.3022	11.0703	11.5613	11.3925	10.5494	10.5126	10.6826	10.3957	11.059	10.7736	11.1556	10.2238	10.075	10.2783	10.2469	10.1128	9.98418	10.1923	10.1613	10.2086	10.6139	10.3726	10.078	10.3662	10.5164	10.7676	10.6792	10.4702	10.6174	10.6942	11.6112	10.6347	10.7251	10.7425	10.7733	10.5229	10.3167	10.4814	10.2565	10.0195
E11 Pancreatic Progenitor	1435351_at	Bend5	8.91539	8.87444	8.79964	9.01818	8.27352	8.21945	8.484	7.85614	7.93263	7.48575	7.85824	8.35162	8.72782	8.4114	8.71344	8.68701	9.14476	7.38038	7.35063	7.14514	6.96425	8.23044	9.33294	7.81983	7.40134	7.358	8.04297	8.01537	7.63824	7.8795	8.66751	8.2089	8.32308	8.4077	8.64281	8.03096	8.49321	7.50291	6.66214	7.01416	7.34153	7.23611	7.31683	7.11563	7.07541	6.70707
E11 Pancreatic Progenitor	1417927_at	Ddx19a	10.4421	10.4971	10.6657	10.6244	10.1637	10.0799	10.1324	10.8181	10.3005	10.3326	8.9756	8.89841	8.59074	8.2924	9.79206	9.64344	10.0512	9.60847	9.82025	9.44211	9.76276	8.77672	8.87267	9.05274	9.08866	8.52754	10.0134	9.68074	9.67033	10.0494	10.7513	9.83471	9.75512	9.59611	10.0634	9.56269	8.55305	9.72414	9.7357	9.35755	8.72844	8.89829	8.61918	9.03936	8.27379	8.69447
E11 Pancreatic Progenitor	1422135_at	Zfp146	7.84324	8.06793	8.11103	8.1328	7.56986	7.4068	7.97322	7.05444	7.88408	7.95291	6.20104	6.27504	6.76532	6.15978	7.48683	7.13595	7.50815	6.16302	6.3532	6.19906	6.47854	4.95486	4.84322	5.59893	5.46893	4.74875	7.51673	7.05562	6.54293	7.37391	6.67933	6.723	6.43251	7.13987	7.61932	7.45837	6.52943	7.41589	7.28564	6.84596	6.94558	5.98803	6.03038	6.44329	5.25288	6.08641
E11 Pancreatic Progenitor	1458218_s_at	Pde7a	11.4748	11.5822	11.2862	11.2339	10.5233	10.2738	10.5516	9.95467	9.99386	9.89689	10.1202	10.2663	10.2222	10.1038	10.4922	10.4643	10.7452	9.77282	9.57193	9.79621	9.48033	8.80472	9.6124	9.65054	9.20322	9.24272	9.14621	9.22934	9.20661	8.9423	8.91803	9.43888	9.59131	9.0839	9.02812	9.08781	9.75878	9.49785	8.64245	8.38562	8.70046	9.09305	8.93443	8.80912	9.24245	7.63675
E11 Pancreatic Progenitor	1425767_a_at	Six4	8.71166	8.80606	8.81203	9.02076	8.38161	8.07592	8.03119	7.31506	7.92853	7.92251	7.75187	7.28429	6.89456	6.64113	7.19852	6.67121	6.86227	7.14504	7.31999	7.28878	7.0817	6.00095	6.70912	7.00042	7.18979	7.40658	7.47801	7.20345	7.11285	7.55735	6.75102	7.44708	7.02119	6.62696	6.56787	6.78568	7.38449	7.66469	8.25499	7.00542	7.87732	7.31004	7.42027	8.36452	7.75698	7.05145
E11 Pancreatic Progenitor	1460370_at	Top1mt	9.49501	9.44205	9.2921	9.26838	9.26009	9.1981	9.03077	9.36025	9.4705	9.02962	8.64288	8.78711	8.8903	8.8387	7.57324	7.54338	8.16508	8.29014	8.11822	7.65693	7.36752	8.56227	8.17401	8.50721	7.97321	7.68922	8.34698	8.94676	8.5314	8.94479	8.67837	8.02644	8.27633	8.4651	8.36271	8.211	8.23881	7.18237	7.33988	7.02117	6.47839	7.28962	8.19834	7.90703	7.41307	7.65825
E11 Pancreatic Progenitor	1428930_at	Tmem29	10.7776	10.8527	10.9193	10.6588	10.1948	10.0473	10.3733	9.20121	9.69499	9.66258	9.39605	9.84833	9.69894	9.56448	10.0945	10.1608	10.2453	10.2488	10.3391	10.1572	9.9803	9.12845	9.00301	8.63153	8.94131	8.44833	9.89665	9.84124	9.75449	9.92217	9.47014	10.0113	9.53036	9.23829	9.34562	9.42613	8.63552	9.1356	9.25171	9.18641	9.45419	9.54181	9.3076	9.44274	9.21326	9.35634
E11 Pancreatic Progenitor	1424258_at	Polr2d	10.9646	10.8491	10.9183	10.7207	10.648	10.5969	10.644	10.2827	10.7807	10.734	9.55244	9.2977	9.41641	9.24175	10.1149	10.0813	10.0958	10.0438	10.1554	9.989	9.95017	8.35935	9.11835	9.44422	9.50085	9.38193	10.115	10.2963	10.2011	10.3748	10.1443	10.0946	10.0096	9.72014	9.95287	9.91174	10.0115	9.08899	9.57877	9.34809	9.33624	9.4187	8.93687	9.32084	9.01269	9.23911
E11 Pancreatic Progenitor	1450191_a_at	Sox13	10.2627	10.1813	9.94095	10.0937	8.84633	8.86906	9.08021	8.97387	8.88522	8.36543	7.48917	8.11483	7.66831	7.95324	9.53633	9.63752	9.56732	9.52202	9.5204	9.45822	9.42164	9.14841	8.99292	8.5335	8.57402	8.54539	9.12965	9.07432	9.06917	9.18145	9.23722	9.05966	9.3242	9.02596	9.3749	9.0923	9.31202	7.74548	8.01875	7.9385	8.05709	8.21105	7.93273	7.84074	7.73575	7.18675
E11 Pancreatic Progenitor	1426290_at	Dimt1	10.678	10.8825	10.8798	10.981	10.3586	10.3336	10.5746	10.4399	10.5657	10.6023	8.97414	9.24622	8.90072	8.64988	9.96827	9.90792	10.1532	8.93756	9.16019	9.07004	8.66562	9.96232	10.2434	9.51839	9.40101	9.49784	10.2814	9.91189	10.1107	9.93763	9.8633	9.96636	9.98121	9.32679	9.93846	9.86995	10.4977	9.74019	9.74236	8.8566	8.78265	8.52527	8.62587	8.8574	8.46708	8.27166
E11 Pancreatic Progenitor	1430423_s_at	2610528E23Rik	8.50301	8.242	8.30517	8.48125	8.27419	8.63958	8.14746	8.27031	9.08104	8.78649	6.52449	7.24639	7.03823	6.36615	6.75745	6.92463	7.2682	7.71536	7.96623	6.74906	7.26933	6.53033	7.04447	7.03665	6.33823	6.65834	6.47451	6.87635	6.69701	6.85045	6.55068	7.1661	7.42949	6.81057	7.04382	6.90261	7.21856	6.76934	6.88524	6.49278	6.89851	6.38335	6.3129	6.55839	6.52462	6.68851
E11 Pancreatic Progenitor	1449592_at	Tcf15	9.05646	9.00046	8.6559	8.83628	7.32239	7.42501	7.09839	8.47503	8.63814	7.94358	6.86016	6.751	6.21729	6.9256	7.87375	7.74664	7.99624	7.9073	6.78124	6.46405	6.65986	6.56561	6.6477	6.48636	6.43846	6.4062	6.53612	6.27941	6.43867	6.95881	7.8255	7.16339	7.03705	8.11623	8.1817	8.13766	7.56902	5.93441	5.82378	6.57937	6.27253	5.82051	6.10331	5.66292	6.13733	6.49598
E11 Pancreatic Progenitor	1447780_x_at	Tufm	10.4262	10.5513	10.4135	10.4614	10.2807	10.7663	10.3126	10.9135	11.0654	10.4451	8.81781	9.25603	9.6324	8.59957	9.86752	9.74489	10.1297	8.93125	9.02426	8.82402	8.20297	9.74959	9.89613	8.02271	8.02034	7.95098	9.75523	9.93042	9.61458	9.79282	10.0108	9.74097	9.73166	9.57304	9.38198	9.18977	9.58463	8.62415	8.78183	9.05159	8.76878	9.72644	9.68693	9.18605	8.73337	9.10162
E11 Pancreatic Progenitor	1433636_at	Bms1	12.017	12.0028	11.8349	12.0123	11.5674	11.4998	11.5291	11.1911	11.6061	11.3248	10.6243	10.7789	10.8726	11.123	10.8047	10.8314	11.0144	10.9438	10.8118	10.8811	10.9401	10.6669	10.5707	10.8796	10.7825	10.7368	10.5618	10.6452	10.4087	10.6245	10.5649	10.4916	10.3497	10.8226	10.8728	10.7219	11.5626	11.1032	10.7028	10.7231	10.9335	10.9274	10.7294	10.7502	10.6562	10.2421
E11 Pancreatic Progenitor	1442824_at	8030497I03Rik	8.28453	8.11902	8.26159	8.51527	6.38314	6.07143	6.66226	6.60897	6.17594	5.82186	8.87892	8.26526	8.92327	6.29581	6.12574	6.07821	6.26401	6.18431	6.31921	7.41014	6.62105	6.3999	6.11406	7.53442	7.31964	7.54442	6.40423	6.48698	6.52814	6.95297	5.66272	6.68727	5.41597	6.67227	6.97297	5.58459	5.80475	6.28313	5.35786	7.03711	6.58433	7.22262	6.73441	7.01433	6.5221	7.58087
E11 Pancreatic Progenitor	1448682_at	Dynll1	13.7548	13.7304	13.6443	13.5512	13.3124	13.2176	13.5079	13.2823	13.3359	13.3043	12.1618	11.8906	11.572	11.6034	12.8453	12.8254	13.5205	12.4179	12.0983	11.9059	12.4353	11.7963	11.466	11.9437	12.1061	12.0169	13.4549	13.4053	13.6248	13.4989	13.422	13.3922	13.3662	13.215	13.4185	13.2298	12.696	13.0735	12.8971	12.0887	11.8362	11.9277	11.9682	11.8961	11.9121	11.7589
E11 Pancreatic Progenitor	1450849_at	Hnrnpu	12.6431	12.4404	12.4688	12.4175	12.1285	12.0261	11.5651	11.7728	12.3853	12.2347	11.8731	11.7311	11.7384	11.749	12.1783	12.0511	11.7284	10.8827	10.8378	10.5576	10.7131	10.2574	10.6297	11.5412	11.4213	11.1382	11.2769	11.9969	11.5242	11.3217	11.3185	11.253	11.3739	11.6537	10.9293	10.7382	12.2057	11.6923	11.3115	11.6116	11.1337	11.8491	11.3594	11.1159	11.5056	11.6864
E11 Pancreatic Progenitor	1430986_at	Farsb	8.82997	8.73686	8.68046	8.5245	8.18816	8.3732	7.80976	8.32986	8.38603	8.92288	6.09467	6.88875	6.22344	6.79095	7.53027	7.55557	7.73655	7.03243	6.52643	7.15988	6.41345	7.38334	7.87755	6.9255	6.87556	6.34431	7.49059	7.91994	7.56783	7.7781	7.613	7.49777	7.56124	6.82452	6.9004	6.64143	7.98151	8.62457	7.43246	7.43663	7.39638	8.17134	7.89732	7.70339	7.52579	7.12558
E11 Pancreatic Progenitor	1426685_a_at	Cnot6	11.4067	11.4789	11.5442	11.5097	11.2641	11.3138	10.7415	10.7229	11.012	11.4016	10.6849	10.7027	10.7114	10.338	11.2051	11.2155	11.3391	10.6808	10.629	10.9609	11.0923	8.41179	7.82877	10.1635	10.2415	10.4073	10.9391	11.1344	10.9186	11.0762	10.8031	10.9748	10.8453	10.1813	10.4533	10.5024	9.85752	10.6852	10.4519	10.0515	9.96259	9.47053	9.33126	9.9347	9.26887	9.76575
E11 Pancreatic Progenitor	1460037_at	Fam98b	10.7814	10.7081	10.7859	10.5654	9.84721	9.91858	10.2089	9.67957	9.94194	10.0044	9.75684	9.54181	9.5517	8.90488	9.79392	9.92213	10.3985	9.33308	9.17552	9.67772	8.9376	8.84531	8.67652	9.45166	9.20054	8.70016	9.90515	10.4371	10.0516	10.1366	9.70287	10.2276	9.72849	9.73124	9.60489	9.66407	10.4706	9.92848	9.95748	9.24559	9.34844	9.5808	9.13723	9.47376	9.518	9.68683
E11 Pancreatic Progenitor	1451482_at	BC027344	8.07871	8.25641	8.14777	8.31725	7.32813	7.33853	7.55194	7.19641	7.41354	7.01398	6.22214	6.49682	6.22588	6.94246	6.91045	7.28581	7.47394	6.56724	6.42158	6.81638	6.38637	8.07064	7.95744	6.903	7.0686	7.06402	6.83537	6.67998	6.70795	7.11203	6.63592	6.73295	6.96165	6.74955	6.59024	6.7494	7.73442	6.64695	7.02173	7.09143	7.0827	7.44763	6.68118	7.13675	7.06661	6.78194
E11 Pancreatic Progenitor	1460193_at	St13	11.9151	12.1329	12.1584	11.9874	11.5605	11.6196	11.5328	11.6963	11.7968	11.8543	10.6753	10.9273	10.5536	10.5484	11.2413	11.383	11.4745	10.5843	10.3068	10.0777	10.5161	10.0361	10.7459	10.1107	10.3665	10.371	11.317	10.9726	11.1507	11.0859	11.1232	11.0875	11.3718	10.5255	10.6317	10.6976	10.8499	10.8799	10.9892	10.1585	10.1537	10.3985	10.6117	10.4403	10.3279	10.685
E11 Pancreatic Progenitor	1455562_at	Sox12	8.33454	8.57244	8.44605	8.56463	7.58458	7.52075	7.50872	7.98001	7.74791	8.04216	5.71176	4.99093	5.25309	5.31961	7.62073	7.49152	8.03474	6.74373	6.94066	6.83465	6.81468	7.18403	6.9728	6.56149	6.80704	6.88877	8.4048	8.19969	8.1327	8.29482	8.27373	8.07537	8.04826	7.08817	7.5891	7.72843	8.62034	7.4981	7.96969	7.27856	7.05246	6.97984	6.73724	6.6124	6.56982	6.69436
E11 Pancreatic Progenitor	1451378_at	Utp6	9.21256	9.44219	9.27512	9.10351	8.58259	8.82449	8.6031	9.23596	9.53792	9.01735	7.85225	7.80419	7.38642	7.64795	7.82307	7.81403	8.36775	6.90466	6.39532	7.09415	6.79197	7.57621	7.77078	7.61511	7.25829	6.05658	7.84571	7.90761	7.6401	7.75742	7.81716	7.73438	7.71025	7.79007	7.82759	7.73857	7.36316	8.01227	8.5034	8.16623	7.99078	8.1093	8.03072	8.06549	7.9512	8.23929
E11 Pancreatic Progenitor	1430020_x_at	Hnrnpa1	13.1682	13.2936	13.2022	13.3644	13.1079	12.8562	13.2458	12.7689	12.9788	12.9752	12.6407	12.6858	12.7149	12.668	12.9166	12.6071	12.9337	12.2906	12.1453	12.3414	11.9988	11.3853	11.3493	11.1116	10.7314	11.3607	12.1521	11.924	12.2159	11.8125	12.7639	12.8728	12.9187	12.5613	12.5359	12.6251	13.0239	12.8504	12.4209	11.8129	11.1088	10.9241	10.8509	11.2801	10.8588	10.6447
E11 Pancreatic Progenitor	1460737_at	Igbp1	12.4314	12.5148	12.6111	12.7047	12.3163	12.2404	12.3433	12.1714	12.1569	12.3176	11.4926	11.8097	11.8392	11.7344	12.0746	11.9811	12.4076	11.2659	11.2849	11.1409	11.0118	10.3864	10.5173	10.646	10.6311	10.6467	11.5594	11.2	11.0917	11.3692	11.5161	11.4576	11.6347	11.4032	11.9493	11.7774	11.6191	11.9328	11.4035	10.6809	10.8643	10.4656	10.8901	11.1993	10.8213	10.4977
E11 Pancreatic Progenitor	1419742_at	1700037H04Rik	9.30984	9.14058	9.09974	9.09569	8.61848	8.56361	8.24543	8.62237	8.59613	8.38156	7.58013	7.91265	7.86164	7.94729	8.15434	8.15933	8.2871	7.49894	7.40808	7.28486	7.72704	8.03402	7.44093	7.67433	7.69742	7.32917	8.22464	8.50006	8.25055	8.66569	8.25267	8.53664	8.67652	7.90964	7.71955	7.78514	8.13206	7.6081	7.8422	7.78961	7.83008	7.81309	7.85849	7.76296	7.88902	7.87284
E11 Pancreatic Progenitor	1428390_at	Wdr43	10.8668	11.0462	10.7961	10.9924	10.3568	10.4754	10.4541	10.6161	11.3703	10.2911	10.4467	10.2035	10.4499	10.5423	9.61204	9.33538	9.6377	9.53929	10.0463	9.62971	9.48539	9.95485	11.1719	9.62271	9.41539	9.29553	8.95189	9.2809	9.47339	9.39003	9.66813	9.01045	8.96832	9.96525	9.53192	9.38371	9.99081	9.76016	9.17317	9.67679	9.76165	10.0402	9.75275	9.56299	9.43142	9.36995
E11 Pancreatic Progenitor	1422712_a_at	Ube2i	12.1824	12.2971	12.0642	12.2667	12.0044	11.9763	12.1782	12.1519	12.1026	12.0783	11.1877	11.0768	11.2212	11.1752	11.8956	11.9623	12.1531	10.6756	10.8386	10.8096	10.694	10.4951	10.4029	10.6658	10.4675	10.4361	11.5937	11.3345	11.3431	11.4692	11.0885	11.2427	11.3072	11.3778	11.5761	11.3699	11.7806	11.5372	11.295	10.5931	10.8078	10.5872	10.3772	10.5525	10.3218	10.2482
E11 Pancreatic Progenitor	1421405_at	Zim1	8.46045	8.8052	8.93644	8.75025	6.62921	6.53266	7.07518	5.88001	5.95117	6.13233	5.38541	5.30182	5.27633	4.74055	7.18604	6.99828	7.55923	6.8012	7.92805	7.38845	6.30815	7.21397	7.88917	6.84172	6.82786	6.9215	6.98204	6.82675	7.21098	6.62848	7.88262	7.0336	7.16975	6.84339	7.10016	7.22935	7.13171	5.66615	6.17344	6.38562	5.66503	6.23569	6.08858	5.50873	5.67983	4.82373
E11 Pancreatic Progenitor	1453056_at	Slc16a13	9.31504	9.14149	9.01463	9.13338	8.13768	8.22762	8.30658	7.74206	8.08524	7.37981	7.97047	7.93613	7.74545	8.07152	7.66804	7.90141	8.21167	6.85479	6.82573	6.82234	6.95521	8.1008	8.19269	7.43666	7.1812	7.03448	7.1412	7.49816	7.29471	7.33558	7.44425	6.87598	7.56112	8.06913	8.03847	7.47491	7.95266	7.07107	7.53734	7.47451	7.9147	7.91267	8.25917	8.15177	7.63348	7.37365
E11 Pancreatic Progenitor	1442171_at	Prpf40a	8.82058	8.86569	9.04434	9.11645	8.43984	7.98684	8.32822	8.19144	7.99608	8.41359	7.00905	6.93421	7.19024	6.10608	8.48812	8.52997	8.70779	7.69562	8.37769	8.43696	7.70486	6.43188	6.38461	6.89239	7.07357	6.3623	8.74136	8.60339	8.285	8.59035	8.2468	8.32023	8.23997	7.22651	7.76363	7.63297	7.45971	7.86377	8.11309	6.89447	6.66275	6.95022	6.47997	7.16082	6.18803	6.5004
E11 Pancreatic Progenitor	1456964_at	Rbm12	11.9032	11.6946	11.6765	11.8225	11.2823	11.2146	10.6249	9.95664	10.0064	10.8167	11.0767	11.0504	11.2477	10.9988	11.8202	11.3527	11.1986	10.5284	10.8826	11.0476	11.3344	8.75762	7.84683	10.7136	10.9941	11.0433	10.6801	10.8803	11.0808	10.9973	11.8301	11.1165	11.1385	10.2472	10.3498	10.1371	11.0815	10.9931	10.8313	10.2636	10.0376	8.99809	8.64669	10.1201	10.1524	9.812
E11 Pancreatic Progenitor	1450872_s_at	Lipa	10.1771	10.2166	10.1291	10.0822	9.3201	9.10713	9.56576	9.4541	9.29902	8.66123	10.8376	9.97889	9.79348	10.4727	7.91687	7.93683	8.33793	8.77159	8.46271	8.03409	8.87204	8.88196	7.64375	7.70611	7.38274	7.43122	9.04409	8.55997	8.87311	9.0541	9.89868	9.42099	10.0399	9.738	10.1467	10.2317	9.09151	9.45351	9.10452	8.09451	7.72216	8.50991	9.96907	9.54134	9.50347	9.38757
E11 Pancreatic Progenitor	1427548_a_at	Clns1a	10.3629	10.4358	10.6767	10.657	9.76692	9.76757	9.62579	9.76274	9.91057	9.76955	7.69739	8.05092	8.034	7.98592	9.14258	9.2755	9.6625	8.47204	8.62442	8.47148	8.00579	7.74674	7.69044	8.67944	8.36061	8.20663	9.51833	9.14162	9.12405	9.57726	9.10628	9.25736	9.37829	9.01899	9.36298	9.08082	9.37136	9.56856	9.61291	8.9794	8.94686	8.26372	8.45817	9.10902	8.77294	8.10881
E11 Pancreatic Progenitor	1423199_at	Brd3	8.89506	8.84276	8.7069	8.98107	8.75822	8.5524	8.40302	8.44246	8.32761	8.26863	7.79481	7.79008	7.27357	7.29633	8.3092	8.30782	8.45623	7.82428	7.34686	7.66191	7.8699	7.01124	6.80926	7.16727	6.61169	5.90984	7.918	7.98807	8.0048	7.82285	7.93453	7.97236	8.02935	7.44647	7.7585	7.62811	9.03033	7.98465	7.9648	7.74378	7.88722	8.05127	7.4007	7.48914	7.25254	7.16993
E11 Pancreatic Progenitor	1460209_at	Usp39	10.3852	10.3926	10.3273	10.1682	9.66769	9.71052	9.94284	9.77685	10.0426	9.7769	9.20375	8.83644	8.93537	9.17193	9.09359	9.28535	9.47765	9.09147	8.45731	8.66118	8.13244	8.76801	9.41345	9.21596	8.86751	8.64561	9.02329	9.0309	9.10618	9.20051	9.3641	8.8976	9.07432	9.16865	9.19878	8.87499	10.0144	9.1601	8.87403	8.89231	9.01316	9.54255	9.37065	9.00227	9.19685	8.91436
E11 Pancreatic Progenitor	1449839_at	Casp3	11.0783	11.0613	11.0537	11.1802	10.786	10.7346	10.9661	10.6727	10.8215	10.6165	10.4149	10.2742	10.0173	9.89505	10.7517	10.7691	11.0753	9.1579	8.56373	8.78964	9.08358	8.87608	8.38839	8.08603	8.51968	8.54857	10.6167	10.6443	10.5727	10.7152	10.4013	10.837	10.7502	10.5714	10.6626	10.7603	8.89568	10.0198	10.2175	9.98061	10.2348	10.2536	9.16955	9.29229	9.3327	9.04811
E11 Pancreatic Progenitor	1452580_a_at	Mrpl21	11.0417	11.0621	11.1138	11.2973	10.8698	10.9846	10.5939	11.0094	11.022	10.9331	8.9789	9.56212	9.66117	9.58235	10.3096	10.4032	10.823	9.71473	9.9558	9.70172	9.89511	10.364	10.2738	9.17385	9.21582	9.49517	10.2357	10.4849	10.4096	10.5054	10.5653	10.5419	10.3477	9.88241	9.86494	9.84158	11.3969	9.79337	9.96839	9.4037	9.3723	9.81934	9.22606	9.21364	9.37738	8.93745
E11 Pancreatic Progenitor	1425229_a_at	Tcf7l2	9.86309	9.71779	9.38964	9.60858	8.96768	8.91488	7.92526	7.47347	7.97598	8.53213	9.61972	9.20046	9.16487	8.90921	7.7649	8.14676	8.50394	7.10585	6.55871	7.04116	7.95102	4.89122	5.7132	8.07931	8.36061	8.45506	7.27426	7.62136	7.70133	7.01952	8.38436	8.18051	7.67186	6.10275	7.24721	7.31921	8.67691	8.17326	8.32215	7.4096	6.94354	6.87989	6.93428	7.16706	7.17836	8.21595
E11 Pancreatic Progenitor	1455670_at	Rbms3	8.25442	8.20375	8.10272	8.36214	7.93361	7.78179	8.0482	6.6185	6.47465	6.21315	6.56816	7.38741	7.35477	7.56308	6.67227	6.88314	7.04815	7.644	7.99804	7.87974	7.87462	7.89702	8.13847	7.83452	9.21825	7.65853	7.13233	6.28179	6.53072	6.69757	8.0196	7.13052	6.9225	7.34747	7.60102	7.43245	7.41772	5.73462	6.163	6.0978	5.90342	6.16824	6.47109	6.42015	6.89035	5.62238
E11 Pancreatic Progenitor	1429448_s_at	Tet1	7.85572	7.91271	8.1298	8.01714	7.31439	7.50932	7.92858	7.30756	7.48859	7.77837	6.32845	6.55687	5.94116	5.30995	7.51388	7.35124	7.58329	7.06449	6.70011	7.4276	6.99657	6.16504	5.94558	6.27103	6.82195	6.10452	7.27421	7.13634	7.36671	7.31636	6.9083	7.46868	7.07931	6.38071	6.66168	7.30267	7.38085	6.97632	7.4227	6.75432	6.55004	7.14946	6.02914	5.44221	6.26192	5.50086
E11 Pancreatic Progenitor	1420654_a_at	Gbe1	8.27092	8.60934	8.57705	8.56581	7.85974	8.01397	8.0198	8.09212	7.93527	8.6468	6.55516	7.0744	6.96059	5.66623	7.15785	7.10701	8.08018	7.02231	7.2578	7.43771	7.06338	6.01524	6.34178	5.88686	5.70772	5.10633	7.57409	7.51133	7.79828	7.28031	7.25425	7.90053	7.62663	7.07848	7.55038	7.66997	6.96455	7.81063	8.10912	5.7496	6.11104	5.36107	6.01781	6.51056	6.36691	6.51992
E11 Pancreatic Progenitor	1446921_at	Grb10	10.5113	10.3559	10.7449	10.5677	9.80236	9.50519	9.27814	8.37589	8.9184	9.20999	9.22878	8.97246	9.2411	8.78412	10.1468	10.0511	8.68391	9.71594	9.6036	10.1279	9.48347	9.57769	9.20222	10.819	11.0117	11.1596	8.79979	9.35289	9.28109	9.39432	9.14739	9.09362	8.8284	8.71917	8.07307	8.69298	8.37432	7.80691	7.75524	8.27307	7.5042	7.84195	8.53055	7.97526	8.09792	8.03243
E11 Pancreatic Progenitor	1416541_at	Clpb	9.90647	9.87971	9.68813	9.80856	9.60395	9.80355	9.59414	10.5115	10.3397	9.93529	8.62014	9.01332	8.94724	9.07543	8.98002	9.23294	9.36128	7.84617	7.83188	7.01719	6.81479	8.69281	9.33873	8.77871	8.1668	8.08653	8.74337	8.5639	8.53217	8.76351	8.9402	8.62272	8.80041	8.86114	8.73136	8.60242	8.82648	8.93862	8.4782	8.81726	8.29071	9.11457	9.03569	8.63252	8.77331	8.7353
E11 Pancreatic Progenitor	1424412_at	Ogfrl1	10.4986	10.3573	10.3636	10.5458	9.73725	9.86334	9.47327	9.9142	10.4295	10.0072	10.1407	10.095	9.95413	10.4428	8.70256	8.77822	9.27423	9.5649	8.83975	8.80267	9.02482	8.47928	9.26241	9.02489	8.88156	9.27965	8.1371	7.91583	7.90179	7.91109	8.84365	8.7856	8.98877	9.73778	9.70793	9.71985	10.5444	10.3778	9.11725	9.50745	9.72401	9.69313	10.6207	10.0322	9.92645	10.3972
E11 Pancreatic Progenitor	1420990_at	Chd1	7.8022	7.94582	8.1124	8.10952	7.14395	7.05128	7.21815	6.54336	6.94981	7.39269	7.86427	6.97787	7.49651	6.9256	6.71133	6.79715	7.05779	5.9507	5.45603	5.74874	6.18683	4.9535	5.24439	6.50574	6.52782	6.0936	6.22749	6.38286	6.64919	6.55534	7.0638	6.85372	7.02141	6.11096	6.59928	6.43355	7.13664	7.23147	7.16862	6.43432	6.53352	5.59515	5.77466	6.36117	6.10191	5.4505
E11 Pancreatic Progenitor	1428957_at	Tmem177	8.44199	8.2735	8.17947	8.33121	8.32988	8.25059	8.25785	8.35778	8.63123	8.1454	6.16737	6.63868	6.48987	6.88425	7.6956	7.76963	8.06698	6.73063	6.10179	6.54392	6.72639	6.06703	6.8542	7.04062	6.34331	6.77852	7.61733	7.20217	7.39517	7.70424	7.02225	6.85088	7.54198	7.24883	7.23571	7.29316	7.53286	7.23658	7.53126	7.74937	7.44321	7.51223	7.37372	7.24411	7.5333	7.08889
E11 Pancreatic Progenitor	1424555_at	9430015G10Rik	9.99791	10.1871	9.92217	9.81748	9.31657	9.28044	9.36861	9.31397	9.49765	9.1798	7.64948	7.93415	7.53348	7.57839	8.58987	8.75435	9.03978	7.83104	7.36261	7.51777	7.29359	9.53104	9.90738	9.44899	9.46779	8.84101	8.37657	8.79949	8.47706	8.35904	8.82056	9.17368	8.92728	8.19319	7.96352	8.58279	8.21328	7.86187	8.34146	8.14892	8.11525	8.58275	7.93787	8.00766	7.74119	7.9019
E11 Pancreatic Progenitor	1420929_at	Ctnnal1	9.05445	9.24687	9.28641	9.38285	8.55828	8.51127	8.60874	7.87995	8.56275	8.36785	8.25299	8.00028	8.36962	7.56763	8.71039	8.69837	8.89672	7.89851	8.59782	8.54352	7.96245	6.68195	6.36506	7.49167	7.01258	7.72382	8.59238	8.18493	8.45443	8.6543	7.84637	8.83268	8.28352	7.54185	7.78327	7.9915	6.37773	8.06562	8.19054	7.81596	8.02072	6.93271	7.2574	7.64762	7.25859	7.34057
E11 Pancreatic Progenitor	1439044_at	Zfp354c	10.3393	10.5464	10.6811	10.3735	9.26147	9.33278	9.26165	8.1958	8.74488	8.62887	7.78849	8.11845	7.94438	8.43845	9.21052	9.22361	9.57019	9.53173	9.21654	9.61485	9.76955	9.65736	9.54322	9.63986	9.58951	9.57696	9.38175	9.70957	9.23483	9.68926	10.0656	9.43265	9.66734	9.69105	9.81474	9.68834	7.06903	8.70257	8.62508	7.86918	7.7297	7.73895	8.40868	8.82753	8.47408	8.24046
E11 Pancreatic Progenitor	1416410_at	Pafah1b3	10.7488	10.8744	10.566	10.6908	10.6831	10.5215	11.1715	9.99479	9.97148	9.65267	9.0158	9.37872	9.5226	9.40764	9.77489	9.55665	10.09	9.45305	9.35583	9.10314	9.4053	9.47382	8.61511	8.87883	8.70897	8.64874	10.0934	10.1223	10.1119	10.2411	9.69016	10.1049	10.6271	9.70159	9.75654	9.73802	10.5217	9.13573	9.75009	8.87762	8.93085	8.9846	8.79752	8.62701	8.70258	8.22029
E11 Pancreatic Progenitor	1429742_at	Rcbtb2	7.85238	7.65276	7.62142	7.80319	7.185	7.03475	7.08597	7.18366	6.79781	6.74764	5.63804	5.66415	5.98538	5.93961	7.39764	7.22319	6.9282	6.15642	6.35188	5.86486	7.60963	6.80284	5.80934	6.17226	6.2842	6.92228	5.91741	6.04421	6.04109	6.19005	6.96705	5.69251	5.63618	5.65762	5.74781	5.39544	4.6857	7.77515	7.63278	6.95188	8.28014	7.63131	7.44345	7.74534	7.45038	7.26012
E11 Pancreatic Progenitor	1435439_at	Dgcr8	10.0776	10.3029	10.0474	10.2043	9.61302	9.50973	9.63691	9.63115	9.61965	9.43821	8.17478	8.32718	7.57689	7.39332	9.37543	9.51424	9.60734	9.04961	9.0587	9.02316	8.86833	9.16706	9.33383	9.23183	8.83147	8.68564	9.34118	9.31925	9.13516	9.38966	9.92901	9.37529	9.83982	8.94118	9.21889	9.21939	9.62296	8.68086	8.85157	8.56473	8.74238	8.32018	8.99564	8.78346	8.59278	8.967
E11 Pancreatic Progenitor	1449983_a_at	Nqo2	9.64468	9.78402	9.58621	9.63134	9.40852	9.47976	9.4556	9.2953	9.63009	9.31785	9.31869	9.5777	9.44187	9.25739	7.65266	7.78796	8.49085	8.30152	6.97255	7.41814	7.55074	6.87859	10.2249	6.85087	6.86345	6.39103	8.35845	8.49742	8.15925	8.44065	8.60013	8.56295	8.31413	8.34932	8.6977	8.66915	10.3124	8.18283	8.81782	8.12208	8.35645	8.91202	8.5744	8.60651	8.50495	8.5227
E11 Pancreatic Progenitor	1428315_at	Ebna1bp2	12.1361	12.2118	12.329	12.3842	11.8026	11.8096	11.839	11.9317	12.2963	12.1679	10.6609	10.7739	10.8457	10.9004	11.2178	11.2312	11.627	10.845	10.7609	10.6726	10.6195	11.1646	10.8304	10.8491	10.576	10.7759	11.5782	11.553	11.6463	11.556	11.4996	11.3652	11.3415	11.5338	11.6685	11.4169	11.4984	11.5149	11.3472	10.8229	10.7144	10.796	10.6539	10.743	10.6084	10.2934
E11 Pancreatic Progenitor	1420111_at	Zfp334	9.49349	9.43109	9.24757	9.58262	8.1645	7.98869	8.50691	7.65914	7.47591	7.0363	6.69211	6.72163	6.84088	7.13035	8.6102	8.83633	8.6875	7.94541	7.86264	8.05884	8.14246	8.46511	8.9068	8.42994	8.29082	7.9854	8.28964	8.05444	8.4534	8.32274	8.64033	7.91229	8.66257	8.07939	8.16048	8.05692	9.33928	7.8931	8.17608	7.70585	8.3608	8.22236	7.8478	7.71838	7.55365	7.42955
E11 Pancreatic Progenitor	1455829_at	Usp14	9.9179	10.1607	10.0401	9.90861	9.40964	9.30762	9.45104	9.0856	9.72945	9.42636	9.13277	8.96057	8.96889	8.75552	9.16246	9.11709	9.23869	9.0147	9.50815	9.3678	9.09471	9.09951	8.98491	9.08874	9.41426	8.68078	9.40601	9.33269	8.78228	9.33818	8.53836	8.65685	8.36994	8.7889	8.73189	8.48939	5.87755	8.53408	8.86545	8.55069	8.85775	8.75707	8.84943	9.10465	8.73748	8.52323
E11 Pancreatic Progenitor	1416931_at	Nif3l1	9.84672	9.97398	9.7267	9.83497	9.24893	9.47499	9.34896	9.57673	9.68795	9.46345	8.39965	8.15135	8.4309	8.31542	8.87328	9.00418	9.31257	8.73027	8.43266	8.40628	8.48941	8.57364	8.48903	8.53669	8.56917	8.28461	8.89561	8.77887	8.75024	9.13746	8.5829	8.65559	8.82241	8.63179	8.78108	8.47319	8.49716	8.63466	9.06588	8.73087	8.77352	8.79322	8.3405	8.70315	8.54328	8.26896
E11 Pancreatic Progenitor	1423481_at	Riok2	9.26243	9.55383	9.52389	9.63554	9.02453	8.976	9.24459	8.58854	8.95001	9.07191	8.00062	8.15738	8.13579	8.10034	8.74301	8.74782	9.06792	7.97616	7.81215	7.29437	7.39032	6.45199	7.67459	6.94334	7.46316	7.02872	8.79509	8.47066	8.28396	8.53844	8.87402	8.71991	8.44031	7.69212	8.25767	8.08207	8.91897	8.05546	8.59557	6.69027	6.90403	7.03558	6.81984	7.04116	7.45465	6.9563
E11 Pancreatic Progenitor	1428401_at	Zcchc3	10.6357	10.6786	10.4047	10.5768	10.107	10.0848	10.1325	10.3862	10.424	10.2556	8.68974	8.7864	9.1438	8.72712	9.86513	9.73993	9.81734	9.65524	9.95974	9.95333	9.72483	8.9224	9.09709	9.4534	9.40604	9.14477	10.291	10.0007	10.1345	10.0188	9.87146	9.85822	9.73021	9.58313	9.76875	9.91387	9.70299	9.02954	9.48186	8.72495	8.81392	8.55671	8.48705	8.72795	8.31562	8.25495
E11 Pancreatic Progenitor	1454819_at	Plekha8	10.7306	10.9271	10.7011	10.5207	9.28581	9.141	9.26213	9.17008	9.37611	9.51034	8.29232	8.40194	7.82876	7.90022	9.82356	9.69066	9.63975	8.94651	9.12931	9.03729	9.10056	8.59838	7.95643	8.98432	9.07179	8.856	10.1251	10.2448	10.2453	10.1256	9.48009	9.48769	9.97855	8.84842	9.06393	8.91412	8.03906	9.13342	9.47838	8.25864	8.06897	8.46341	8.51565	8.94469	8.42244	8.28551
E11 Pancreatic Progenitor	1434173_s_at	D19Bwg1357e	11.9814	11.8921	11.7417	11.8299	11.5156	11.6101	11.3359	11.2898	11.6981	11.247	10.6671	10.6187	10.8286	10.7126	10.6408	10.736	11.123	10.2156	10.7566	10.5481	10.6566	10.9458	10.9701	10.6303	10.2475	10.4555	10.4364	10.8181	10.8028	10.7579	10.9017	10.6716	10.7686	11.0865	10.8716	10.649	12.2244	10.7559	10.5226	10.7633	10.8245	11.2703	10.8471	10.4302	10.7489	10.1689
E11 Pancreatic Progenitor	1430701_a_at	5730528L13Rik	7.66993	7.78972	7.8555	8.01309	7.54281	7.46069	7.89975	6.71562	7.016	6.93274	6.19588	6.6662	6.41084	6.33744	7.06179	7.13745	7.47474	6.28532	5.71117	6.45058	5.82398	7.77985	7.38906	6.11839	6.64825	5.96169	6.36297	6.1175	6.24349	6.26888	6.45732	6.58085	6.71638	6.39674	6.77701	6.69568	7.67928	5.63103	5.73818	5.56989	6.14716	5.77656	5.24744	5.80707	5.5866	7.69497
E11 Pancreatic Progenitor	1436706_at	Mmgt1	8.7822	8.53402	8.72271	8.56847	8.6106	8.70531	8.7914	8.4572	8.99866	9.2326	7.84852	8.02541	7.00951	6.17223	8.58544	8.7124	8.56059	7.10426	6.18323	7.48183	7.24367	4.6886	5.77548	6.69473	6.3773	5.54506	7.56627	7.6395	7.65669	7.50717	7.41437	7.66814	7.24756	6.68538	7.39492	6.95836	6.09931	7.6319	8.05116	6.99439	6.71353	6.87786	6.60121	7.20266	6.76593	6.71018
E11 Pancreatic Progenitor	1423045_at	Ncbp2	11.6287	11.8179	11.8838	11.8947	11.3804	11.3917	11.7222	11.1133	11.5006	11.2478	9.61807	9.6982	9.63749	9.60622	11.1823	11.0499	11.1471	10.8209	10.6752	10.6451	10.515	10.2625	9.91504	10.507	10.1956	10.2503	11.5337	11.1637	11.3293	11.4037	10.8073	11.0779	10.8022	10.8176	11.0315	11.0751	10.7414	10.752	11.0944	10.3017	9.96963	10.3528	10.0689	10.2195	10.2282	10.2736
E11 Pancreatic Progenitor	1444005_at	Fam125b	8.23076	7.92524	8.06956	7.91925	7.64965	7.36174	7.53795	7.00255	6.97696	7.02622	6.64606	6.99019	7.67735	7.17277	7.71328	7.58638	7.18228	6.305	6.44272	6.35847	5.58518	6.80094	8.60776	6.10998	6.63335	4.94669	6.52986	6.90759	6.80063	7.26697	6.93231	6.35069	7.1943	7.05014	6.70873	6.54075	6.08313	5.57675	4.60154	5.92242	5.74285	6.39005	7.5859	6.74996	6.6642	6.88597
E11 Pancreatic Progenitor	1429461_at	Ints2	10.0253	9.81968	9.93875	9.74421	9.21759	9.20952	8.95498	8.98418	9.49889	9.54329	8.63871	8.77245	8.86635	8.11985	9.25518	9.39907	9.20488	8.41498	8.56744	8.62267	8.99469	7.427	6.89156	9.74633	9.38896	9.20667	9.2623	9.71112	9.47777	9.25358	8.23685	8.73121	8.57161	8.27672	8.19317	8.37772	6.92452	8.18738	8.61239	9.07306	9.02062	9.10822	8.62054	8.78556	8.65024	8.8359
E11 Pancreatic Progenitor	1449530_at	Trps1	8.46874	8.35939	8.24303	8.4349	6.72832	6.45535	7.92754	6.26539	6.76048	6.66147	9.33564	7.64063	7.51491	7.81359	6.80232	6.50217	7.07706	6.99154	6.45747	5.98287	6.85736	6.80603	8.58235	6.94562	7.26346	6.43435	7.18575	7.09324	7.31703	6.50966	7.54079	7.21324	6.80995	7.92622	8.43622	8.09875	8.79232	8.54245	7.66764	7.38775	7.72469	8.01123	7.99228	7.8014	7.735	7.86972
E11 Pancreatic Progenitor	1417770_s_at	Psmc6	10.0002	10.1544	10.1465	10.0447	9.8667	9.83117	10.07	9.9908	10.189	9.92495	9.64914	9.71707	9.85588	9.59819	9.83325	9.91496	9.87408	8.984	9.28731	9.45229	9.05664	8.90653	8.36198	8.74889	8.48011	8.49536	9.42198	9.01639	8.97567	9.14472	8.31658	8.74476	8.87553	9.22285	9.26001	9.00693	5.3664	8.33256	8.89794	8.7783	8.61147	8.80406	8.4723	8.76005	8.3647	9.09878
E11 Pancreatic Progenitor	1434238_at	Taf2	10.8682	10.9572	10.949	10.8383	10.8527	10.6225	11.3412	11.0363	10.4353	11.0495	9.60462	9.61367	9.56396	8.41056	10.4256	10.3387	10.3938	10.0978	10.2444	10.4641	9.96541	8.44976	8.30398	9.29706	9.45631	9.80974	10.6123	10.4403	10.6063	10.3703	10.2603	10.1238	9.9546	10.1558	10.7197	10.4773	7.94825	10.1513	9.80771	8.47847	8.2663	8.9688	8.50892	8.80685	8.32099	8.84539
E11 Pancreatic Progenitor	1429099_at	Duxbl	7.96996	7.99605	7.74621	7.77083	7.50612	6.98752	7.04684	6.322	5.95998	5.75819	5.88269	6.49654	6.67248	6.05077	7.05616	6.94277	7.14988	7.58118	8.58778	8.03518	7.58156	8.90044	8.02926	6.52965	6.8301	7.27652	6.78203	6.26543	6.40309	6.77894	6.4778	7.19846	7.18611	6.51315	6.26385	6.38841	6.32012	5.89079	5.91358	6.37424	6.21473	6.52657	6.12341	5.49828	5.73196	6.07201
E11 Pancreatic Progenitor	1448070_at	Xpo1	8.4245	8.72352	8.71094	8.60246	7.97689	7.5307	7.85672	7.12503	8.07981	7.93784	6.84351	6.86287	6.79892	6.84492	6.85853	7.03762	7.63689	7.26607	7.08275	7.23979	7.58443	6.59952	8.12564	7.00519	7.79426	7.25009	7.47031	7.75699	7.38449	7.54018	7.64667	7.45421	7.67496	6.37319	6.44073	6.67293	6.78279	6.49895	6.63909	6.21037	6.78339	7.21473	7.28802	6.72397	6.60148	6.51926
E11 Pancreatic Progenitor	1425844_a_at	Rngtt	8.01542	7.97212	8.12948	8.11602	7.89135	8.0395	8.45551	7.87572	8.09058	8.39889	6.39457	6.81669	6.95912	6.61305	7.8217	7.41218	8.02074	6.29849	6.83452	6.30278	7.11436	4.74601	5.20686	5.7617	6.2734	5.85205	7.94884	7.59826	7.67207	7.87957	6.80351	7.69637	7.38931	6.69891	7.68031	7.56708	6.59252	7.18079	7.18038	6.70662	6.40127	5.79153	5.71309	6.48815	5.65342	6.32821
E11 Pancreatic Progenitor	1455609_at	Cit	10.3508	10.1981	10.3815	10.479	9.43414	9.25679	9.59014	8.8846	9.13164	9.11864	8.1427	7.61344	6.82058	7.09789	8.49138	8.82333	8.49495	10.2262	10.9316	10.4712	10.03	9.41945	10.6594	9.84953	9.51439	9.52722	8.9014	9.40875	9.27121	9.08668	9.27868	9.76953	9.45624	9.06443	8.59981	8.68551	8.69001	8.50376	8.64056	9.45513	9.573	10.2741	9.76772	9.92681	9.797	9.61456
E11 Pancreatic Progenitor	1434286_at	Trps1	8.84248	9.14488	8.90776	9.0792	7.91213	7.57859	8.62678	6.9212	6.68646	7.57523	7.44143	7.41494	7.06358	6.68741	7.32607	7.31099	8.02975	8.41412	7.49279	7.43928	7.47715	8.47341	7.65124	7.12356	7.18353	7.51605	8.54636	7.59257	7.30916	7.375	8.72333	7.80147	8.36975	8.13748	9.142	8.763	6.66256	8.4545	8.2133	6.86803	7.83948	7.68612	7.65883	8.05464	7.21447	7.8125
E11 Pancreatic Progenitor	1460414_at	Obsl1	9.74091	9.65687	9.38552	9.57874	9.56288	9.29494	9.84399	9.36102	9.63743	9.0377	7.69773	7.77051	7.90597	7.49254	8.38692	8.42444	8.40611	8.16155	7.67366	7.85946	7.87856	7.85848	8.17564	7.85784	7.68822	7.95313	8.62128	8.40737	8.37618	8.59757	9.52657	8.44714	9.10333	8.74564	8.94905	8.78218	8.59115	7.20856	7.44053	7.44782	7.43388	7.81753	7.41257	7.47029	7.52727	7.39747
E11 Pancreatic Progenitor	1417404_at	Elovl6	10.8433	10.8834	10.6102	10.7202	10.3475	10.231	10.413	10.3395	10.5061	10.2804	8.70651	9.15419	9.42592	8.66063	8.21077	8.00534	8.58813	9.48637	9.60124	9.69568	9.43385	9.74493	10.2167	9.23204	9.77695	9.10563	9.85436	9.68845	9.96593	9.96382	10.2929	10.1609	9.86157	9.85667	9.72874	10.1412	10.6153	9.90965	10.1697	10.2169	10.1301	9.92085	9.35912	9.37555	9.41592	9.41857
E11 Pancreatic Progenitor	1435105_at	Rnf208	9.14934	8.90465	8.88322	8.88657	8.09867	7.87638	8.3853	7.45664	7.62037	6.89061	6.85451	6.85993	7.37564	7.09806	7.66393	7.84157	7.92765	6.90979	6.85284	6.71832	7.01524	8.58817	8.3784	8.63922	7.96328	7.55374	8.10455	8.69223	7.93195	8.4883	7.99587	8.65142	8.39937	7.89655	7.64527	7.56008	9.58414	7.03956	7.57391	8.16783	8.25414	8.62219	8.57023	8.14048	7.96651	7.59102
E11 Pancreatic Progenitor	1423416_at	Smarcc1	12.0109	11.7322	11.9525	12.0262	11.8333	11.5642	11.592	11.3706	11.7136	11.6403	10.1267	10.3589	10.1859	9.99697	11.8166	11.7221	11.5205	10.9144	10.6468	10.4799	10.5761	9.45482	9.70586	9.791	9.82466	9.82614	11.0821	11.2422	10.9317	10.8332	10.7249	10.8916	10.7396	10.815	10.8036	10.6031	9.47895	10.7489	10.5816	10.9237	10.8874	10.9492	10.7128	10.6656	10.6402	10.4608
E11 Pancreatic Progenitor	1452731_x_at	Gm8348	12.2098	12.3772	12.2776	12.0701	11.7891	11.5525	11.7467	11.435	11.3922	11.226	11.1018	10.666	11.2885	11.1244	11.9811	12.0804	11.9647	12.0523	11.8105	11.8814	11.4977	11.3213	10.3483	10.4752	10.9803	10.9867	10.4637	10.4634	10.9374	10.7418	11.1752	11.1864	10.6516	11.3678	11.0967	10.6595	10.5955	10.0509	9.7618	11.0255	11.2824	11.1252	10.822	10.5941	11.161	10.1015
E11 Pancreatic Progenitor	1448884_at	Gtf2e2	10.9074	11.0514	11.1051	11.1364	10.3175	10.3356	10.6213	10.532	10.2901	10.6964	8.52201	8.84551	8.42762	8.4421	10.6866	10.8754	10.9507	10.0793	10.4784	10.3396	10.2417	8.99562	8.79999	9.72729	8.9802	9.26911	11.0521	10.8367	11.1085	11.2632	10.801	10.723	10.6844	9.94889	10.1026	10.1073	11.079	10.1361	10.3359	9.61805	9.68432	9.90054	9.10078	9.24909	9.41012	8.93215
E11 Pancreatic Progenitor	1433860_at	6030458C11Rik	9.67586	9.75449	9.82106	9.94034	9.47645	9.44719	9.5905	9.60237	9.58483	9.87995	7.13934	7.22895	6.84136	7.14251	9.39329	9.14318	9.53019	8.46907	8.63749	8.84618	8.85431	8.27652	8.75156	8.26952	8.46784	8.04936	9.64922	9.57175	9.4608	9.41049	8.87007	9.00076	8.81261	8.8212	9.28484	8.98644	9.29237	9.31234	9.24894	8.14223	8.40589	8.25846	8.36989	8.29944	8.38919	8.61524
E11 Pancreatic Progenitor	1417183_at	Dnaja2	11.1012	11.1655	11.2695	11.4146	11.0088	10.8534	11.234	10.8847	11.0816	11.0329	9.75274	9.78971	9.89806	9.86084	10.6568	10.5854	10.6253	9.70473	9.91543	9.95474	9.54487	8.86165	7.59892	8.7889	8.76858	9.3676	10.928	10.3572	10.3653	10.5875	10.2495	10.308	10.2912	10.3599	10.6988	10.3386	11.2006	11.1181	10.751	9.45652	9.34854	9.2035	8.81296	9.4988	9.33938	8.60226
E11 Pancreatic Progenitor	1423118_at	1200014J11Rik	9.62301	9.72507	9.35485	9.49636	9.28628	8.96736	9.54832	9.32272	8.94183	9.46336	7.82362	7.79529	7.64117	7.33889	9.02365	8.93351	9.39217	7.76824	7.87958	7.7185	7.70496	7.19472	6.6998	6.77041	6.89245	6.93522	8.96178	8.60561	8.7137	8.63726	8.57138	9.17058	9.35252	8.47637	8.83658	8.585	8.87139	9.22479	9.08612	7.3281	7.06221	6.91307	6.44015	6.81323	6.99699	6.86597
E11 Pancreatic Progenitor	1424012_at	Ttc30a1	8.62566	8.59482	8.86289	8.67003	8.68549	8.58329	9.08923	8.51736	8.346	9.07914	6.21962	5.7426	5.60495	6.16463	7.47509	8.00849	7.97704	8.29614	8.05234	7.76352	8.53196	7.98367	6.64772	7.65511	7.60097	6.81825	8.34215	7.62596	7.539	7.82668	7.42613	7.28149	7.65036	7.3225	7.56473	7.21609	7.46217	7.16295	7.98402	7.14381	7.16705	7.28345	7.45373	7.68535	7.65645	8.08062
E11 Pancreatic Progenitor	1453400_at	Dydc2	8.31662	8.42031	8.06281	8.34526	6.57314	6.32375	6.26192	6.46549	6.27568	5.92402	7.32211	7.09262	7.74969	7.20074	6.59685	6.24649	6.28704	6.33936	6.80901	6.17545	6.01032	6.74778	7.56814	7.15994	7.10207	6.92315	6.86042	6.65642	7.32977	7.44287	5.94893	6.32929	6.24378	5.90306	5.98125	6.08838	7.29431	5.4288	6.02636	6.45978	6.19207	6.54495	7.26161	7.17211	7.08786	6.73119
E11 Pancreatic Progenitor	1450950_at	Smc3	10.1122	10.3341	10.2389	10.3929	9.89696	9.78029	10.3584	10.2939	9.77437	10.4936	8.56166	8.70557	8.44335	7.95698	9.54223	9.58436	9.59628	8.67809	8.72955	8.94809	8.61824	6.8873	7.39674	8.81102	8.80809	8.57573	10.3392	10.1703	10.0702	10.1518	9.86402	9.84781	9.91711	9.03179	9.61575	9.62175	8.67238	9.65869	9.64621	8.34738	8.0463	7.99779	7.65156	7.76179	7.39405	8.34648
E11 Pancreatic Progenitor	1451466_at	D16Ertd472e	9.68314	9.50249	9.62632	9.87134	8.02089	7.84567	7.63663	7.82486	8.16099	8.47978	7.8768	7.60678	7.65682	7.50565	8.86124	8.62936	8.86157	8.02395	7.92131	7.89187	7.68996	7.70472	7.55041	8.38101	8.24183	7.79691	8.16796	8.25792	8.03719	8.17564	8.2486	8.2387	8.1174	7.80315	7.88683	7.92628	5.86814	8.39646	7.6713	7.2802	7.47464	7.26032	7.51134	7.72449	7.15212	7.62125
E11 Pancreatic Progenitor	1429205_at	Mllt3	10.6672	10.5	10.4091	10.3915	9.98659	9.8326	10.2465	9.02245	9.40579	9.17953	9.56998	9.79134	9.5584	9.62419	9.03466	8.98895	9.27045	9.84668	9.70717	9.58702	9.58561	9.45248	9.52342	9.54056	9.4949	8.89958	8.98783	8.94693	8.67251	9.06936	8.06175	8.1973	9.43886	8.8974	8.69734	8.57813	9.40655	8.79195	9.07386	9.06365	8.99657	9.13388	8.61693	9.07574	9.06875	8.96811
E11 Pancreatic Progenitor	1418123_at	Unc119	9.88714	9.75357	9.65538	9.60892	9.10285	8.99603	9.23818	8.49944	8.63805	8.01417	8.31338	8.27683	7.68956	8.03273	9.16649	9.02314	9.19748	8.25289	8.3519	8.44772	7.68108	9.54975	9.18999	8.70353	8.38354	7.91747	9.35048	9.52361	9.2991	9.69877	8.99946	9.00697	9.07792	8.88006	8.86558	8.51943	9.28768	8.18203	8.006	7.92191	8.13747	8.44094	8.71741	8.44278	8.24685	8.19944
E11 Pancreatic Progenitor	1440303_at	Slc7a6os	7.79264	7.93536	8.03481	7.81609	7.09793	7.13952	7.16638	7.4375	7.82005	7.47327	6.39869	5.74137	6.22453	5.92135	6.97931	6.72336	6.94391	7.26258	7.84674	7.2263	7.33658	7.4348	7.05759	7.25863	6.79838	7.19897	7.15465	6.99492	7.1522	7.16789	7.23231	6.67561	6.89156	6.61388	6.30309	6.6699	6.26213	6.76494	7.24604	6.67244	6.56707	6.36234	6.31284	6.74964	6.47673	6.64818
E11 Pancreatic Progenitor	1437715_x_at	Apex1	12.6064	12.768	12.8702	12.8267	12.4719	12.4779	12.4326	12.6847	12.7022	12.5796	11.309	11.5594	11.7753	11.8391	11.8661	11.9111	12.1425	12.0427	12.2147	12.1374	12.0396	12.0471	12.1384	11.7786	11.8348	11.856	11.6732	11.4803	11.2837	11.3521	11.8082	11.2693	10.8942	11.7946	11.6739	11.2608	7.40526	11.181	10.889	11.6075	11.61	11.8741	11.601	11.6633	11.6175	11.782
E11 Pancreatic Progenitor	1419522_at	Zmynd19	9.76053	9.89448	9.54981	9.72202	9.33009	9.28398	9.13083	9.42682	9.54032	9.40816	7.55492	7.31173	7.67765	7.35148	8.60431	8.6347	8.79124	8.83701	9.00508	8.46717	8.6023	7.81944	8.90109	8.35868	7.50037	7.95091	8.55482	8.56768	8.89418	8.62789	9.03833	8.87763	8.59545	8.50779	8.43191	8.15732	9.26266	8.0617	8.33596	7.94922	8.41256	8.57126	7.94997	7.937	7.71393	8.05658
E11 Pancreatic Progenitor	1429093_at	Ddi2	10.5951	10.3826	10.6298	10.5945	10.2414	10.2422	9.84041	10.0254	10.023	10.8059	9.54792	9.31953	9.54551	9.04698	9.88587	10.084	9.72358	9.14363	8.66223	8.50307	9.38908	6.49365	7.18992	9.13978	9.15861	9.39371	10.3658	10.6084	10.5146	9.86136	9.33676	9.57884	9.0715	9.09291	9.49401	9.4836	10.1034	10.1821	10.0074	9.49237	9.60439	8.89869	9.35669	9.68625	9.30416	9.87234
E11 Pancreatic Progenitor	1448923_at	Prkra	10.7231	10.8474	11.0234	10.9525	10.7096	10.5038	10.6783	9.76139	10.0412	9.88759	9.23079	9.5753	9.37787	9.38038	10.0762	10.1397	10.2839	9.65635	9.83295	9.60668	9.41179	10.099	9.86301	10.3993	10.1876	10.3741	10.2102	10.1431	10.2398	10.2145	9.82356	10.0904	10.0305	9.56386	9.61925	9.80751	7.75334	9.10556	9.25015	9.2414	9.15272	9.05565	9.41424	9.30576	9.08304	9.15129
E11 Pancreatic Progenitor	1421797_a_at	Snx12	8.85883	9.17678	8.94038	9.10674	8.5195	8.56144	8.73687	8.92975	8.48632	9.45779	7.76611	7.64367	7.71909	7.12791	7.95791	7.86663	8.54593	7.69509	7.89983	7.57537	7.49598	5.95121	7.08355	6.68893	7.04099	6.9585	8.52535	8.47291	8.1863	8.09321	7.93273	8.33942	8.4078	7.13369	8.25532	8.32755	7.337	7.87569	8.1788	7.16019	7.27498	7.26069	7.26044	7.49501	7.5927	6.68051
E11 Pancreatic Progenitor	1450909_at	Eif4e	9.3734	9.61035	9.51083	9.65305	8.70019	8.84571	8.50108	8.64027	8.98835	9.23595	9.37501	8.49675	8.80906	8.28412	8.63853	8.57857	8.48602	8.29233	8.75258	8.92712	8.72277	8.20695	7.31348	8.99318	8.96563	8.29067	8.89447	9.55449	9.0817	9.18819	8.05112	8.78136	8.76693	7.59158	7.95996	8.15587	7.04735	8.52446	8.87792	7.84536	8.29724	7.81639	7.9778	8.20772	7.67454	7.79924
E11 Pancreatic Progenitor	1417090_at	Rcn1	12.0556	12.1693	12.3199	12.2267	11.6247	11.5791	11.6205	11.0292	11.1034	11.0751	10.856	10.9087	11.0117	10.8528	12.0165	11.9736	11.7934	11.6615	11.8362	11.6991	11.5393	11.2738	11.1995	11.4646	11.1978	11.246	11.9339	11.4429	11.5979	11.6	11.7616	11.7238	11.7054	11.4346	11.6495	11.6056	7.15749	10.4862	10.3921	9.94538	9.70146	9.86522	10.0576	10.1248	9.65335	9.67241
E11 Pancreatic Progenitor	1418462_at	Exosc9	11.1373	11.2441	11.4173	11.3446	10.916	10.7244	10.5091	10.4367	11.4507	11.2682	8.599	9.23977	9.19804	8.9955	10.4621	10.3265	10.5715	10.5975	10.9197	10.6897	10.6969	10.2969	10.6701	10.5134	10.2149	10.3	10.1536	10.2955	10.0442	10.3517	10.2882	10.4891	9.93455	10.1716	9.98303	10.1557	9.50772	10.3653	10.4066	10.3673	10.219	10.3549	9.99063	10.2835	10.2237	9.65322
E11 Pancreatic Progenitor	1434469_at	Otud4	7.8707	7.88259	8.20064	8.17671	7.14662	7.25145	7.38015	6.02195	6.66673	7.76358	8.10103	7.03488	7.01857	6.67621	6.79989	6.64619	6.73827	6.26016	6.7574	6.55203	6.59742	4.96041	5.33831	5.69635	4.68855	5.04653	7.16396	6.71862	7.31834	6.66413	6.86522	7.47925	6.98696	5.6775	6.48574	6.51741	5.03589	7.51232	7.76331	6.08116	6.49949	5.9307	5.97947	6.06354	6.49242	5.29337
E11 Pancreatic Progenitor	1454669_at	Tmem11	10.9102	11.0551	10.8163	10.9427	10.4997	10.5162	10.3209	10.6607	10.6763	10.6346	10.6639	10.4575	10.9008	10.8486	10.4269	10.3615	10.8936	8.59374	8.3033	8.51583	8.34463	8.82237	8.62985	9.1478	8.97248	9.02651	10.2967	10.5679	10.4981	10.5	10.4918	10.5639	10.5448	9.84139	10.2341	10.0524	10.8937	10.4583	10.4515	9.36547	9.28807	9.03455	9.24173	9.6485	9.42497	9.38213
E11 Pancreatic Progenitor	1451347_at	Ino80e	8.84381	8.72079	8.50606	8.54578	7.92224	7.73989	8.17232	7.81594	7.90523	7.58256	6.47357	5.76971	6.00473	5.93495	7.5458	7.58843	7.54296	6.91999	6.67138	6.71632	6.32766	6.83852	6.96456	7.1516	7.05873	6.16469	7.96654	8.0382	7.99763	8.37024	7.12865	7.35185	7.33666	7.66081	7.86785	7.911	8.63408	7.48974	7.49541	7.28748	7.61141	7.75551	7.15414	6.98669	6.91055	6.91127
E11 Pancreatic Progenitor	1436852_at	E130308A19Rik	9.267	9.04438	9.32576	9.08134	8.75176	8.61177	9.0569	8.56851	8.57295	8.53663	7.48738	7.97164	8.06282	8.21847	8.09288	8.19002	8.1572	7.38897	7.19665	7.26781	7.34859	7.77521	7.34781	7.54304	7.3158	7.70303	8.44933	8.36147	8.22045	8.40224	9.5313	7.6555	7.7257	8.13568	7.92168	7.88582	8.29389	6.76831	7.44933	7.76936	7.92054	8.0943	7.74155	7.54493	7.61681	7.23785
E11 Pancreatic Progenitor	1421940_at	Stag1	8.60423	8.55611	8.71032	8.83315	8.28497	8.22407	8.10128	7.8511	8.07061	8.52421	7.79357	8.05266	7.9377	7.44796	7.89841	7.66503	8.0521	7.34068	7.07286	7.19177	7.11965	6.20187	6.50229	7.39184	7.38107	6.8295	7.81008	7.82273	7.74009	7.87746	7.75973	7.34035	7.75866	7.33617	7.76251	7.34681	9.21553	7.90008	8.18658	7.89786	7.72643	7.48321	6.82195	7.19345	7.03212	7.97589
E11 Pancreatic Progenitor	1450129_a_at	Socs6	8.90688	9.06236	8.75701	9.06503	8.34612	8.28506	8.82349	8.41374	8.28815	8.9904	8.4877	8.06404	8.08167	7.63599	8.27348	8.0552	8.60923	7.43605	7.55741	7.49482	7.48552	7.48351	7.72744	6.80569	6.41631	5.96799	8.24169	7.79526	7.94066	8.03211	8.58655	8.45263	8.42026	7.06532	8.03467	7.85521	7.05593	8.29263	8.33346	6.9147	6.82941	6.72892	6.47224	6.89981	7.10195	7.32929
E11 Pancreatic Progenitor	1439823_at	Ctbp2	8.14328	8.37817	8.13825	8.28819	8.23907	8.24989	7.23065	8.56606	7.3384	9.24079	8.84068	7.895	8.67051	8.00273	7.78919	7.85273	7.1906	6.47518	6.48149	6.50713	6.41479	6.07563	6.4228	7.29118	7.57543	7.62147	7.1012	7.366	7.61829	6.83635	6.72787	7.57563	6.97891	6.07655	6.2797	6.86997	7.2163	6.92968	6.92792	6.51097	6.53081	6.18945	6.24535	6.77381	6.5669	6.72685
E11 Pancreatic Progenitor	1430539_at	Mxra7	9.0054	8.6462	8.81248	8.43158	8.44688	8.27517	8.34469	6.78251	7.05352	6.70274	6.67833	6.45417	7.38442	7.21147	5.44097	5.88558	6.30579	7.01669	6.82251	6.45778	7.08379	4.64155	4.78945	4.24951	5.36533	4.3506	6.11811	6.02822	6.56587	6.45695	6.63319	6.19594	6.77304	6.80513	7.13295	6.8737	7.48196	5.60343	6.06452	6.10005	6.13626	6.96676	6.6034	6.40282	6.19287	6.86558
E11 Pancreatic Progenitor	1436584_at	Spry2	11.1081	11.3801	11.3693	11.2303	10.6272	10.3224	10.8412	9.57876	9.28	9.64969	11.6635	11.5745	11.2737	10.8054	10.2015	10.2913	10.3481	10.8388	10.9809	11.1964	10.8084	9.45456	9.65799	9.64171	9.57878	10.2246	10.0942	10.126	10.1733	9.61327	10.722	11.0182	10.8693	10.3593	11.1471	11.2088	10.2636	9.82564	9.79211	8.77141	8.13421	8.27383	8.43116	8.48508	8.82943	9.37181
E11 Pancreatic Progenitor	1439840_at	Polb	8.07914	7.88488	8.13437	8.17186	6.76645	6.48313	6.39729	5.92832	6.06457	7.14849	6.43682	6.59944	6.99903	6.20102	7.81624	7.70662	7.467	6.57876	6.99992	7.21648	7.52696	6.39867	5.09412	7.58842	7.626	7.28986	7.58135	8.22739	7.87395	7.76788	7.32434	7.48462	9.0774	6.00394	5.97659	6.69428	8.0597	7.58674	7.58724	6.85801	6.5788	6.29775	6.08304	7.08937	7.07891	6.33539
E11 Pancreatic Progenitor	1449557_at	1600012F09Rik	8.69364	8.80984	8.98226	8.69648	8.54066	8.69118	8.56316	9.07465	8.62906	8.75848	6.40213	7.14992	7.26365	6.58272	7.76586	8.27674	8.52413	7.97628	7.72293	7.70648	7.72184	7.29954	6.33484	7.4636	7.67157	7.86056	7.85866	8.1487	7.72049	7.84397	7.15692	6.94154	8.12691	7.22987	7.54277	7.64974	7.49134	6.76148	7.48619	6.98274	7.62235	7.20997	7.58471	7.82197	7.74684	7.77048
E11 Pancreatic Progenitor	1459371_at	Eif4e	9.20347	8.83723	9.1842	9.19088	7.8542	7.96889	7.35319	7.28049	7.23038	8.54851	8.60629	7.94637	9.03705	8.3957	8.29523	7.99063	7.45078	6.06937	6.17988	7.1879	7.78793	4.4767	6.74911	7.96944	8.2372	8.09721	8.73763	9.13828	9.34458	8.73224	6.95517	8.16971	7.95867	6.62081	7.52189	7.87401	7.58413	8.46215	8.56688	7.62971	7.7109	6.37307	5.67272	7.55658	7.2297	7.14061
E11 Pancreatic Progenitor	1452099_at	AA408296	10.1302	10.3527	10.0553	10.1023	9.54781	9.7169	9.63214	9.6789	10.1619	9.65904	8.29049	7.95101	8.56736	8.59093	9.23007	9.30413	9.60301	8.60459	8.6122	8.95517	8.39929	8.84989	8.79335	9.18486	9.01494	8.86858	8.79124	8.57778	8.4259	8.79603	8.91711	8.47464	8.61884	9.15394	8.98386	8.87581	7.70307	8.90622	8.78266	8.96393	9.10993	8.91203	9.02375	8.86789	8.83486	8.39868
E11 Pancreatic Progenitor	1438853_x_at	Ddx54	11.1261	11.1019	10.8749	10.9309	10.8375	10.8725	10.8383	11.0466	10.9611	10.6186	10.5235	10.0583	10.1741	10.2939	10.3531	10.4713	10.6206	9.29091	9.55767	9.52056	9.17509	10.1762	9.34999	8.90323	8.8403	8.2844	10.1514	10.3614	10.3095	10.2845	10.9356	10.0517	10.0867	10.4973	10.4729	10.1611	10.6559	9.29851	9.24124	9.39444	9.63718	9.72805	9.53419	9.53204	9.56495	9.59775
E11 Pancreatic Progenitor	1422609_at	Arpp19	10.7314	10.7325	10.7449	10.4509	9.78927	9.83908	9.87846	8.93869	9.7689	9.53138	9.00786	9.2938	8.93933	8.75565	9.6635	9.70613	9.87727	9.16753	8.73128	8.63189	9.04677	9.68513	10.1516	9.4508	9.41342	9.3991	9.61996	9.68219	9.62357	9.71518	9.85016	9.96857	9.7494	8.26192	8.43635	8.81797	9.33321	8.73315	9.18406	8.69804	8.32589	9.20539	9.21814	8.61783	8.56657	8.87187
E11 Pancreatic Progenitor	1459512_at	Meis1	9.35597	9.45734	9.0675	9.32049	8.34213	8.32959	8.09661	8.14838	8.40161	8.32673	7.5154	8.11848	8.06983	7.55302	7.55299	7.54209	7.19361	6.83666	7.17336	7.05694	7.09964	7.49512	7.80572	8.18565	8.60749	8.70802	6.43678	7.20564	7.59099	7.10406	8.23346	7.70611	7.96378	7.64963	6.94528	7.72458	6.05618	7.42666	7.63142	7.1854	7.67504	7.53605	7.75565	7.42276	7.34412	7.09855
E11 Pancreatic Progenitor	1434122_at	Fbxo27	8.37318	8.06963	8.22473	8.1835	9.44076	9.09854	9.76328	7.50715	7.07047	7.08142	6.39367	6.15766	6.81917	6.69892	6.37771	6.62973	7.15185	7.07609	6.55224	7.19171	7.37637	7.25986	6.49433	6.6156	6.60865	6.70238	6.57651	6.4885	6.01449	6.84931	7.07937	6.78827	7.02756	7.114	7.0653	7.25607	8.14962	7.24049	7.70269	7.41472	7.86103	7.72851	7.16128	7.20133	7.32272	6.71348
E11 Pancreatic Progenitor	1454914_at	2610101N10Rik	11.0978	11.0804	11.3973	11.1687	10.5541	10.6485	10.27	10.0258	10.2555	10.5209	10.46	10.6878	10.4719	10.1346	10.2852	10.3296	10.4579	9.87592	10.1399	9.9925	10.1716	8.58724	8.57221	10.0552	10.1969	10.0115	9.92563	10.1462	10.0301	9.96678	9.79142	10.3858	10.5238	9.22863	9.4855	9.61339	7.48424	10.2151	10.0846	10.31	9.73919	9.70385	9.14977	10.0017	9.88924	10.1726
E11 Pancreatic Progenitor	1444049_at	Adat1	8.88874	8.94643	8.79074	8.67749	8.24506	8.57918	8.08016	7.94363	8.84719	8.45936	6.76486	7.06382	6.46667	6.52466	7.6498	7.65699	8.12672	8.05137	9.01392	8.65763	8.5153	8.87341	8.84931	8.78508	8.73617	8.02334	7.68116	8.20824	8.42409	7.80177	6.58193	7.39107	8.25819	6.92714	6.48907	6.92452	7.17163	7.14505	7.21611	7.81719	8.05982	9.02328	7.20201	7.16052	6.91448	8.08575
E11 Pancreatic Progenitor	1426724_at	Cnn3	11.6802	11.8894	11.8688	11.9573	11.7236	11.4474	11.9708	10.9737	10.9949	11.0762	11.0448	11.4071	11.2874	10.9896	10.8102	10.9382	10.8745	10.4815	10.5247	10.53	10.1114	8.57709	8.72336	8.70126	8.94211	8.50942	11.5188	11.0552	11.1378	11.3255	11.7176	11.5071	11.689	11.4349	11.7522	11.5909	11.6313	11.15	11.0797	10.4059	9.9508	10.056	10.0493	10.2027	9.99262	10.1916
E11 Pancreatic Progenitor	1438237_at	Gm13242	8.10515	8.01198	7.84381	7.7848	7.74116	7.54763	7.57448	6.91698	6.852	7.0603	6.41085	7.01561	7.61408	6.05258	6.33472	6.70747	7.52943	7.17271	7.6304	7.51976	6.3592	7.3166	6.58487	4.91404	4.88902	4.0611	7.20061	6.85223	6.7179	7.1844	6.47797	7.06016	7.64822	7.61882	7.24714	7.29643	5.58703	5.75902	5.97319	6.95233	7.30728	7.5826	6.63603	5.92804	6.75019	5.63872
E11 Pancreatic Progenitor	1443231_at	Magi1	8.88029	8.60536	8.6905	8.85051	8.81973	8.40653	8.50483	7.71962	7.99902	8.13397	9.70074	8.7956	9.02231	8.32358	7.12755	6.83182	6.39423	6.6756	6.79303	6.92113	7.2493	5.57787	6.17825	6.93446	7.50511	7.47891	6.38034	6.77946	7.59419	7.1142	7.8083	7.73117	8.29395	7.43807	6.6505	7.07068	9.53486	8.47584	8.23203	7.75435	7.71515	7.67366	7.70044	7.90609	7.90764	7.43941
E11 Pancreatic Progenitor	1423470_at	Ptbp2	11.5478	11.8308	11.811	11.7853	11.0635	10.6847	10.9861	9.92483	9.66055	10.1657	11.3101	11.2614	11.3242	10.5266	11.7107	11.725	11.4515	10.2602	10.5679	10.9944	10.7354	10.1109	8.76185	10.619	10.632	10.8355	11.3865	11.2631	11.4647	11.3331	11.4263	11.6719	11.4981	10.2892	10.8556	10.8146	11.5177	11.2836	11.1137	10.0008	9.26708	9.018	8.8678	9.42366	9.12654	8.87444
E11 Pancreatic Progenitor	1424327_at	3200002M19Rik	10.7705	10.6976	10.4428	10.5912	10.3126	10.4257	10.1171	10.3057	10.5094	10.2847	10.2099	9.78821	9.82534	10.1949	9.28509	9.38159	9.64209	9.11159	8.56407	8.8629	8.94656	9.21793	8.84406	8.49881	8.80912	8.62927	9.05855	9.05733	9.12186	8.99508	9.66804	9.1615	9.26811	9.35245	9.32422	9.67734	10.3105	9.47614	9.15161	8.99294	9.04799	8.94467	9.00497	9.02927	9.14918	9.14079
E11 Pancreatic Progenitor	1429763_at	Cnih4	10.915	10.6113	10.7896	10.9393	10.483	10.4591	10.3552	10.5433	10.5998	10.617	9.96629	9.66146	9.37946	9.47462	9.94868	10.0905	10.4139	9.47124	8.90105	9.1666	9.04294	9.09578	9.09941	8.72763	8.4657	8.03746	9.88704	9.90072	9.68272	9.49599	10.2648	9.7455	10.0244	10.0619	10.1443	9.93917	9.21184	9.44911	9.0735	8.61026	8.72828	9.04446	9.47151	9.24232	9.30977	9.21027
E11 Pancreatic Progenitor	1438041_at	Pde7a	10.3902	9.83697	10.0898	10.0605	8.61016	8.69742	8.86434	8.5598	9.25383	9.32395	8.66875	8.74366	8.48626	8.08458	8.94641	8.73041	8.94186	8.28424	7.89762	7.46949	8.10628	6.15615	5.11134	8.8141	8.34267	8.59094	7.7778	8.14941	8.35126	7.82991	6.81598	7.54695	8.14958	7.31524	7.43264	7.41387	7.64496	8.28065	7.22296	7.27895	7.52399	7.79922	7.74432	7.79703	7.09372	7.74637
E11 Pancreatic Progenitor	1422793_at	Pafah1b2	8.89155	9.05988	9.22193	9.15306	8.37823	8.31309	8.43892	7.60927	8.04478	8.63308	7.38777	6.98676	7.21428	6.84641	8.93048	8.59845	8.97021	8.20218	7.998	8.18326	8.32756	7.9857	6.60557	7.20373	6.7876	7.27484	8.69003	8.57116	9.0317	8.48458	8.13672	8.38724	8.65261	7.27764	7.8526	7.58103	8.98008	8.78778	9.37888	7.60992	7.56752	7.28762	6.911	7.76185	6.76818	7.67897
E11 Pancreatic Progenitor	1436249_at	Ttll4	9.64366	9.7082	9.33651	9.45818	8.37367	8.31802	8.22504	8.40232	8.71215	8.42691	8.32912	8.32356	8.50948	8.98293	7.51337	7.5811	7.82434	7.01593	7.03217	6.6973	6.63004	7.83042	7.91085	7.74749	7.31775	7.10253	7.29444	7.14247	7.15073	7.22658	8.52817	8.0936	7.7506	7.55328	7.56058	7.78196	8.72999	7.27498	7.63663	7.82835	7.87732	8.04839	7.87519	7.6954	7.65494	7.77521
E11 Pancreatic Progenitor	1453221_at	Gopc	10.1143	10.1609	10.3589	10.2938	9.46706	9.47063	9.64062	9.04591	9.13011	9.59168	8.84602	8.99997	8.77013	8.56117	9.50331	9.21716	9.29896	9.15586	9.26803	9.33799	9.56016	9.17762	8.2538	8.81148	9.05343	9.06075	9.74717	9.81293	9.6964	9.76725	8.7672	9.3635	9.49058	9.04856	9.52889	9.41912	9.133	9.32918	9.46637	8.72781	8.96867	8.67208	8.69298	8.91473	8.44999	8.3701
E11 Pancreatic Progenitor	1416595_at	Mrps22	11.1962	11.0198	10.9058	10.9795	10.7433	10.8111	10.6421	10.7572	11.1465	10.9466	9.5519	9.80358	9.6821	9.69419	10.187	10.2957	10.3783	10.0832	10.2397	9.97377	9.90844	10.155	10.4735	10.142	9.85145	9.44111	10.2409	10.3497	10.4605	10.2586	9.86627	10.0375	10.0387	9.71773	9.63974	9.41263	8.80084	9.37071	9.64428	9.54449	9.59449	9.95014	9.8633	9.65463	9.50471	9.22524
E11 Pancreatic Progenitor	1448585_at	Gtf2h4	8.41018	8.21834	8.15501	8.095	8.08714	8.12379	8.28649	8.16009	8.80841	8.13442	6.12948	6.74373	6.24996	6.58612	7.28878	7.21381	7.67345	6.54825	7.22206	6.95911	6.50988	6.54376	7.13717	6.32793	6.59604	6.22974	7.14998	7.47762	7.51712	7.5047	7.56358	7.21936	7.13878	7.33307	7.39895	7.49638	6.4739	6.49813	6.88856	6.70887	7.08549	7.65666	7.31009	6.96077	6.60428	6.75668
E11 Pancreatic Progenitor	1424801_at	Enah	10.913	11.1637	11.1768	11.1575	11.1376	11.0507	11.5619	9.95809	10.3489	9.92415	9.87408	10.2922	10.4458	10.5623	10.235	10.2979	10.7442	10.2776	10.414	10.3621	10.0679	10.4525	10.6095	9.53928	9.88821	9.81318	10.2682	9.93466	9.8843	10.0869	9.70808	10.0402	10.1509	9.82017	9.99397	10.0262	10.4215	9.48825	9.43143	9.23014	9.39256	9.58664	9.76099	9.61272	9.43245	8.83958
E11 Pancreatic Progenitor	1453129_a_at	Rgs12	9.03178	9.03126	8.58668	8.83667	8.28905	7.94611	8.75899	7.59029	8.16699	7.24032	7.93652	8.15225	8.00008	8.15886	7.89287	8.1603	8.45116	7.24106	7.74112	7.68581	7.53461	5.63849	4.87389	5.80266	5.51659	5.26582	7.19915	7.0036	6.69475	7.49412	7.93428	7.48807	7.79764	8.52506	8.32581	8.28611	5.99566	6.51848	5.60762	6.29274	6.69691	6.82615	7.12929	6.7703	6.69897	6.46562
E11 Pancreatic Progenitor	1417131_at	Cdc25a	8.90638	8.69699	8.55201	8.74101	9.10134	9.22263	8.44978	8.86986	9.43574	9.38704	7.33209	7.34508	7.23382	6.74132	8.17713	8.25695	8.17232	6.89696	6.84177	6.81054	6.77513	6.66805	6.56309	7.23755	7.25306	7.07981	7.5493	8.48927	7.90179	7.95465	7.30009	7.68831	7.5188	7.65533	7.67251	7.77884	7.53018	6.3032	6.86548	7.434	7.30682	7.39918	7.29283	7.27532	7.18606	6.84192
E11 Pancreatic Progenitor	1455653_at	Ccnj	8.57511	8.75266	8.61534	8.39771	7.72732	7.68283	8.05701	8.16305	7.71094	8.49846	6.10326	6.30455	5.56537	6.02254	8.52831	8.6365	9.1831	7.41908	7.30166	6.96917	7.61608	7.39361	7.40473	7.09208	6.83139	7.52513	8.07393	7.90179	7.64441	7.56883	8.13521	7.81848	8.24009	6.83452	7.1308	6.96648	8.62318	8.15372	8.20574	7.28399	7.14923	5.60607	6.5456	6.81299	6.85335	7.22917
E11 Pancreatic Progenitor	1454917_at	Alg10b	10.2555	10.4578	10.5582	10.4708	10.108	10.1608	10.409	10.7113	10.4635	11.0314	8.86115	8.91126	8.67319	8.16323	9.96188	10.0588	10.1997	9.09569	8.87748	9.19807	9.18725	8.06849	8.24295	8.75667	9.07983	8.31097	10.3525	10.0146	10.0077	10.1335	9.89422	9.94363	9.95068	9.39679	10.0496	9.81094	8.44906	9.86393	9.94689	8.83517	8.48412	8.78968	7.93539	8.79221	8.35024	8.03498
E11 Pancreatic Progenitor	1428458_at	Pop1	9.5954	9.43893	9.22987	9.40343	8.99288	8.9619	8.92504	9.1226	9.35059	9.00634	7.74364	6.74159	7.36065	6.99193	8.3563	8.34498	8.34882	7.82984	7.60589	7.16207	7.81841	8.29936	7.88489	8.20531	8.03198	7.71782	8.16412	8.46265	8.37445	8.32473	8.18275	7.94004	8.53026	8.29064	8.26339	8.09913	8.95239	7.86015	7.93491	7.93074	8.09648	8.08459	7.96382	7.8902	7.71249	7.36443
E11 Pancreatic Progenitor	1415799_at	Wbp11	10.755	11.0535	11.0154	11.0335	10.4462	10.5477	11.0271	11.1241	10.5274	11.1803	9.26325	9.287	9.27977	9.09757	10.4119	10.4591	10.6878	9.50568	9.57788	9.9353	9.67018	9.22639	8.77579	9.47152	9.518	9.71935	10.8865	10.7562	10.6134	10.6453	10.2366	10.9207	10.5058	9.77008	10.473	10.1408	7.72354	9.79115	9.97272	9.30642	9.21359	8.82764	8.83663	9.12446	8.71075	9.14932
E11 Pancreatic Progenitor	1435669_at	Zfp532	10.5376	10.8428	10.6247	10.795	10.5965	10.3508	10.6321	9.59236	9.50643	9.64984	9.14506	9.73914	9.43247	8.25571	10.5052	10.4903	10.5896	10.2664	9.81159	10.3127	10.3455	9.02256	8.84439	9.313	9.79586	9.82923	10.2365	10.1998	9.96938	10.1561	10.1121	10.0458	10.0312	9.33699	9.75312	10.0084	9.319	8.95372	9.35945	8.72474	8.86515	8.40048	8.11657	8.82664	8.23761	8.60434
E11 Pancreatic Progenitor	1418006_at	Zc3h18	10.8506	10.6332	10.7614	11.0038	10.4436	10.308	10.77	10.6071	10.4781	10.7618	9.24498	9.38896	9.55927	9.29993	10.0768	9.9405	9.99983	8.20908	8.16632	8.5783	8.08949	8.17226	8.27258	8.61348	8.68144	8.85743	10.0622	10.0612	10.1514	10.2051	9.94878	9.83774	9.73637	9.79874	10.1381	10.1189	10.8026	10.1786	9.94165	9.73364	9.98909	9.51894	9.21466	9.54916	9.23136	9.21418
E11 Pancreatic Progenitor	1425996_a_at	Hltf	8.21993	8.03134	8.04462	8.27132	7.63736	7.19207	7.48056	6.32621	7.34266	7.57373	7.07354	7.23816	6.76734	6.93939	6.91153	6.3183	6.83753	6.5422	5.91432	6.66473	6.24448	5.81678	4.84618	7.47208	7.4369	6.73694	7.03243	7.2712	7.00025	6.83228	6.37839	6.89983	8.04218	6.6141	6.74679	7.18575	9.34338	9.25803	8.77149	7.68897	7.54989	6.90586	7.29038	7.81233	7.37168	7.66174
E11 Pancreatic Progenitor	1442223_at	Enah	10.1619	10.4193	10.3785	10.5373	10.2931	9.80572	10.0812	8.2195	8.28889	8.90231	8.4239	8.79884	9.28981	8.88294	9.90306	9.41196	9.53416	9.53944	9.94823	9.71498	9.2708	9.64617	9.18035	9.24977	8.9989	9.67579	8.98764	8.79969	8.69538	9.36985	7.89076	8.65699	8.55335	8.44788	8.01466	8.60554	10.1211	9.5059	9.14483	8.83057	9.28228	9.08128	9.42351	9.08173	8.64449	7.59845
E11 Pancreatic Progenitor	1421905_at	Tgs1	11.1497	11.0293	10.7952	10.9046	10.314	10.3391	10.2571	10.2669	10.3015	10.0264	9.58797	9.28006	9.31049	9.47261	10.086	10.1805	10.5623	8.56316	8.50982	8.2282	7.6931	9.67858	9.59266	9.37627	9.37694	9.31828	9.90976	10.2359	10.1948	10.1912	10.4247	9.82147	9.96946	10.2941	10.1869	10.0828	10.5436	9.89956	9.42346	9.20736	9.71521	9.79737	9.92291	9.45847	9.6165	9.59496
E11 Pancreatic Progenitor	1459896_at	Pogk	7.71197	7.63125	7.85963	7.93409	7.33352	7.06447	7.45504	6.8649	6.85429	7.33238	7.73387	7.62479	7.72352	7.16034	7.19267	6.87242	7.38008	6.99247	6.25038	7.48289	6.81399	5.09172	7.63815	6.64163	5.98431	5.35081	6.89889	6.89863	6.59359	7.3985	6.32263	7.01182	7.37259	5.9102	7.14219	6.75843	6.29704	6.01723	6.74404	6.03811	6.14204	6.65329	6.06174	5.53386	6.3044	6.01715
E11 Pancreatic Progenitor	1451543_at	Fbxo21	8.63334	8.57188	8.30577	8.6448	7.80024	8.03253	8.15701	7.53738	7.67254	7.45237	5.99406	5.80102	6.3304	6.12155	7.32354	7.23759	7.45857	6.87753	5.66822	6.58595	6.64316	6.64608	6.92139	6.99568	6.87676	6.84976	7.73125	8.18143	7.74724	7.85447	7.26246	7.58391	7.74163	7.14969	7.31519	6.81828	8.54805	7.13082	7.83078	7.9408	8.17529	8.47689	7.58575	7.58628	7.48536	7.5995
E11 Pancreatic Progenitor	1428029_a_at	H2afv	12.3517	12.149	12.0573	12.1107	12.0833	11.8528	11.946	11.4919	11.514	11.2397	11.3103	11.3535	11.4247	11.3194	11.7394	11.7502	11.9397	10.7333	10.7569	10.3964	10.4721	11.1013	11.4659	10.6501	10.451	10.1344	10.9954	11.1965	10.9351	11.083	11.6981	11.5004	11.5702	11.1691	11.2357	11.217	11.2035	10.9765	10.7497	10.2213	10.5463	11.1921	10.5802	10.4197	10.5381	10.5955
E11 Pancreatic Progenitor	1418605_at	Nr2c1	9.0361	9.2677	9.18324	9.34154	8.85724	8.80281	9.25573	8.64432	8.73117	8.57538	8.2874	8.80956	8.65781	8.66029	8.21104	8.25914	8.66698	7.84619	6.94325	7.10419	7.46825	7.74059	8.43906	6.77153	7.35874	7.47891	8.02942	8.0617	7.06041	7.85192	8.34167	8.32305	8.59644	7.82742	8.02152	8.14359	8.48855	8.14253	8.60218	8.06246	8.34295	8.45886	8.76375	8.68183	8.42205	8.3853
E11 Pancreatic Progenitor	1456672_at	Rrp12	8.6207	8.76416	8.40875	8.46575	7.68879	7.68754	7.53043	8.12232	8.62383	7.80937	7.36278	6.55088	7.20224	7.03279	6.69273	6.32704	7.21624	6.45462	6.80792	6.46521	6.87037	7.02019	8.63993	7.24419	6.49066	6.85735	7.21779	7.33591	6.89543	7.3069	6.94203	7.04434	6.90836	6.5136	6.89285	6.46841	7.57463	6.09866	6.63934	7.50341	7.52545	7.60524	7.53291	6.79648	6.96018	7.16993
E11 Pancreatic Progenitor	1418845_at	Proc	8.75911	8.57003	8.77861	8.87968	7.33635	7.64196	7.34816	8.65595	8.24064	8.21828	6.2012	5.87696	6.63801	6.98686	8.19616	8.06813	8.26956	8.39969	8.41013	8.33953	7.85584	8.5338	9.08895	8.55792	8.04848	8.13029	8.73016	8.58058	8.51938	8.74359	7.9355	7.24738	8.80511	7.8397	6.89474	7.03504	7.73164	6.89307	6.5546	7.03823	7.56595	7.85772	7.07269	6.67444	6.97868	6.32962
E11 Pancreatic Progenitor	1437500_at	Noc3l	8.16977	8.13381	8.47857	8.31809	7.95329	8.01871	7.60379	7.06752	8.30962	8.4204	6.70848	6.57398	6.97752	6.62842	7.24828	7.46462	7.90991	7.39401	8.12308	8.10514	8.18753	6.88493	6.0372	7.29419	6.88531	6.65214	7.57093	7.73141	7.74861	7.3985	7.13058	7.34621	7.14975	7.07039	6.85243	7.00845	5.0544	7.14742	7.77631	6.83644	6.18228	6.07966	5.74592	6.317	6.20711	5.25853
E11 Pancreatic Progenitor	1436941_at	Fam55c	8.34363	8.38408	8.20172	8.06457	8.08154	8.09105	8.18964	6.77034	7.57906	7.17923	6.38476	6.76937	6.68468	7.24231	6.95148	7.34294	7.56659	8.54253	7.5685	8.65272	7.04154	6.60616	7.20714	5.49824	5.36954	5.10301	7.21582	7.40976	7.69852	7.04793	7.4646	7.56499	7.60975	7.51556	7.36609	7.42054	5.52901	8.46992	6.86581	6.43022	6.79452	6.73321	7.83041	7.38356	7.13071	6.20602
E11 Pancreatic Progenitor	1428822_a_at	Snx24	9.71463	9.93232	9.96636	10.0738	9.47069	8.93939	9.88066	7.32065	7.40777	7.0763	9.15661	9.13863	9.2268	8.81542	8.79766	8.6899	8.87159	8.59285	8.82346	8.82741	8.36194	8.30349	8.10889	8.67774	8.73075	8.68332	9.55192	9.41909	9.63553	9.59657	8.69561	9.11685	9.17523	9.11971	9.34602	9.18016	10.2323	8.913	9.11125	8.35842	8.56967	8.58625	8.01541	8.01179	7.88224	8.23498
E11 Pancreatic Progenitor	1449017_at	Nutf2	10.3324	10.6775	10.4526	10.5686	10.1601	10.1291	9.97747	10.377	10.2929	10.4062	7.54661	7.71494	7.7908	7.55161	9.72288	9.53107	9.93428	9.95752	9.81511	9.98249	9.8111	9.8825	9.59095	9.71594	9.90894	10.192	10.4026	9.91937	10.1015	10.088	8.83716	9.54987	9.56063	8.82718	9.16009	9.00389	7.94016	9.13013	9.81929	9.13318	9.29215	8.90217	8.61077	9.13987	8.48512	8.21739
E11 Pancreatic Progenitor	1460396_at	Ddx54	10.6051	10.5216	10.2747	10.3609	10.1495	10.1682	10.1712	10.3681	10.3238	9.94871	9.47872	9.2999	9.71343	9.68767	9.58535	9.78408	9.94771	8.58741	8.57087	8.29143	8.41954	8.2881	7.88424	8.13425	7.83628	7.71793	9.37154	9.56715	9.5862	9.86388	10.1694	9.53314	9.40717	9.8107	9.83427	9.61535	10.2877	9.06355	8.82555	9.12218	9.37641	9.56636	9.14659	9.31264	9.12674	8.91668
E11 Pancreatic Progenitor	1421934_at	Cbx5	11.9183	11.4448	11.6059	11.4834	11.0712	11.0667	10.3033	10.0423	10.5142	11.1194	9.86668	10.0415	9.85073	9.12964	10.5853	10.5918	10.305	9.50821	9.12028	9.58292	9.26262	7.51051	7.22479	9.8879	10.1769	10.0407	9.98391	10.9157	10.9385	10.4428	10.1351	10.5537	12.5505	9.68162	9.81082	9.64553	10.6063	9.87249	10.3636	9.96585	9.03189	9.2082	9.1292	9.59154	9.81992	9.64298
E11 Pancreatic Progenitor	1436189_at	Nqo2	7.55987	7.58026	7.65457	7.70722	7.34994	7.15279	8.02595	6.9782	7.47339	7.56623	6.97519	7.69667	7.16083	6.62915	5.73317	5.11668	5.63941	6.8879	6.67857	6.48226	6.41327	8.21644	4.21524	5.09796	4.15157	3.97828	6.66366	6.53232	6.72543	6.36799	7.76386	6.56368	7.00708	6.83283	7.13989	7.58104	6.39194	7.0332	7.51698	6.65263	6.29301	6.3367	6.67455	6.53957	6.12802	6.54655
E11 Pancreatic Progenitor	1422488_at	Nxt1	11.3544	11.1283	10.9995	11.1172	10.853	10.8441	10.847	10.9407	10.9939	10.8234	9.07242	9.36191	9.30131	9.60642	9.78029	9.83314	9.97934	10.0443	10.1489	9.87543	9.81897	9.6419	9.50822	9.59898	9.33474	9.16872	9.88183	9.90884	9.94943	9.88492	10.3161	10.5263	10.2091	10.0087	10.1469	10.1019	9.67257	10.1331	10.1693	9.52634	9.68795	9.59026	9.37126	9.45547	9.10528	8.84579
E11 Pancreatic Progenitor	1430614_at	4632415K11Rik	9.47105	9.49508	9.36019	9.15305	8.73896	8.74711	8.61527	7.82032	8.3782	8.14322	6.45398	6.56568	6.8437	6.08388	8.88748	9.14993	9.60213	8.33914	9.39148	8.40006	8.68775	8.08103	7.47994	7.88686	8.06621	7.61523	9.09365	8.79398	8.85533	9.15229	8.20212	8.70898	8.84427	8.35956	8.15255	8.02784	6.55382	7.59463	8.33296	8.52174	8.49029	8.96179	8.45115	8.37901	8.19325	7.46656
E11 Pancreatic Progenitor	1428878_a_at	Pitpnc1	8.78358	8.85577	8.87484	9.13058	8.10716	8.19917	7.59873	7.81745	7.6	8.31162	7.89992	7.29679	7.09529	6.87064	7.91786	7.40837	8.33578	7.08013	6.96744	7.11429	6.74425	6.50108	7.46082	7.64274	7.9966	7.52478	7.87105	8.6124	8.53082	7.87674	7.71537	7.67871	8.24298	6.92397	7.53746	7.3049	7.46087	8.6461	8.12192	7.50047	7.15022	7.16891	7.02068	7.40022	7.28919	7.03593
E11 Pancreatic Progenitor	1459108_a_at	Yeats2	9.68852	9.53522	9.39886	9.40988	9.46408	9.30385	9.51654	9.24314	9.61677	9.08351	8.03639	8.21374	7.96371	7.92481	9.10877	9.09995	9.0926	8.30917	8.16927	7.93267	7.74633	7.65405	8.07858	7.68646	7.87118	7.65067	8.95051	9.01058	8.90489	9.11641	8.54813	8.47525	8.62018	8.94847	8.73272	8.68349	9.14339	8.11959	7.72183	8.14852	8.47809	8.64081	8.09495	7.85743	7.92257	7.89906
E11 Pancreatic Progenitor	1434288_at	Bivm	8.92283	9.19272	9.29988	9.28597	8.73766	8.65004	9.15028	8.70734	8.57086	8.82299	7.22233	7.69031	6.67083	6.29704	8.10113	8.11074	8.55192	8.43743	8.59057	8.08816	7.77402	8.61737	7.23732	7.45373	7.34066	6.94466	8.81925	8.41787	8.15298	8.17795	7.56738	8.05038	7.75992	7.5982	8.16568	8.20795	7.85299	7.90818	8.21464	7.33847	6.69774	7.03935	6.98069	7.17373	6.76456	6.77595
E11 Pancreatic Progenitor	1458526_at	Supt16h	9.02061	8.67136	8.75678	8.73953	7.59247	7.24913	7.42172	7.22233	7.4789	7.76034	7.73861	7.61858	8.32112	7.93157	7.92955	7.72897	7.49199	6.41406	8.29756	7.7778	7.59177	6.38617	6.2276	7.10764	7.1518	6.80116	7.32173	7.49257	7.43133	7.73621	7.3534	6.99707	7.05944	7.20875	6.53257	7.2109	6.52187	7.29154	7.1193	7.72233	8.05833	7.22555	6.95937	7.18161	7.32886	6.79655
E11 Pancreatic Progenitor	1419169_at	Mapk6	11.7082	11.9733	12.015	11.9833	11.2128	11.1373	11.2722	10.6639	10.5666	11.1142	11.859	11.428	11.4482	11.1902	11.732	11.8854	11.6903	10.6872	10.9233	11.2204	11.0752	9.14953	8.64993	9.51919	9.33406	9.88382	11.8578	11.5364	11.4827	11.4843	11.1535	11.5457	11.6967	10.6907	11.1879	10.95	10.2859	11.6523	11.7532	10.5543	10.3969	10.6625	9.78314	10.2261	9.81237	9.50868
E11 Pancreatic Progenitor	1445537_at	2310039F13Rik	9.8597	9.5517	9.82823	9.98118	10.1731	9.68814	9.33999	9.00537	8.68199	9.19981	7.15834	8.32007	8.19597	7.71751	8.87396	8.52831	8.02358	8.98998	9.36262	9.69037	9.33558	8.46937	8.84197	8.93824	9.79343	10.1139	8.57831	9.44862	9.10955	9.15217	8.27938	8.99053	8.74059	7.34931	7.15223	8.13861	8.89575	7.54193	6.85425	7.80974	7.48601	7.09866	7.37439	7.22983	7.38671	7.56303
E11 Pancreatic Progenitor	1417274_at	Snrpa	11.4051	11.2195	11.0878	11.0959	10.9621	10.9683	10.8552	11.0307	11.0534	10.756	9.3462	9.49338	9.73806	9.73021	10.3685	10.3638	10.5928	9.17094	9.55005	9.21209	9.11165	9.70605	9.95366	9.73374	9.69119	9.27361	10.4108	10.4542	10.2528	10.481	10.5701	10.3662	10.2436	9.99379	9.80693	10.0173	10.6368	9.64985	9.70074	9.8251	9.65787	10.0184	9.54396	9.50364	9.59354	9.53479
E11 Pancreatic Progenitor	1453504_at	Taf15	10.5221	10.3802	10.111	10.2044	10.1268	9.89274	9.38195	9.46159	9.85521	10.3299	9.50754	8.75225	8.88008	8.54254	9.78353	9.52236	9.24117	8.11886	8.15825	7.93074	7.88881	6.9327	6.31758	9.01903	8.51361	8.97846	9.18258	9.46512	9.68252	9.22843	9.29262	9.10536	8.99693	8.47829	8.66553	8.77189	9.03982	9.33337	9.16417	8.94778	8.75225	9.02172	8.55509	9.0611	9.00313	8.51667
E11 Pancreatic Progenitor	1418451_at	Gng2	9.34704	9.60613	9.46315	9.36868	6.53468	6.90988	6.1733	7.23318	8.79761	7.9691	9.95338	8.49415	8.30334	9.36904	8.26689	8.36093	8.69629	8.37854	7.26676	6.59744	7.12622	8.38343	9.19468	8.85413	8.72272	8.15244	8.68637	8.84921	8.55832	8.09686	10.3214	9.025	8.94543	8.75767	9.02531	9.11742	9.24288	9.0295	7.97221	7.8211	7.3448	8.10297	9.45477	8.92474	9.04758	9.38771
E11 Pancreatic Progenitor	1455330_at	Nol9	8.33662	8.3781	8.13125	8.11678	7.77085	8.00543	7.85547	8.55931	8.78846	8.34568	6.75643	6.74696	6.83714	7.07461	6.91836	7.10893	7.47618	6.68539	6.94023	6.88435	6.40838	7.02931	8.1059	7.54659	7.06677	6.57795	7.05096	7.05953	6.98488	7.3758	6.92332	6.60307	6.87722	7.27907	7.18274	6.66129	6.70881	7.07393	7.08781	6.89266	7.38603	7.30743	7.4192	7.24504	7.05599	7.05389
E11 Pancreatic Progenitor	1416812_at	Tia1	10.3863	10.1681	10.5754	10.456	9.85616	9.76321	9.91614	9.30296	9.04325	9.75118	8.14772	8.63427	8.24141	7.23097	10.3466	10.3932	9.92443	8.38439	7.68385	8.89445	8.99778	7.14864	6.91087	8.9614	8.98085	9.4491	10.412	10.5407	10.4414	10.4665	9.64338	10.2365	10.0574	8.62807	9.44439	9.39728	10.1478	9.62492	9.60457	8.87845	8.84365	8.52541	7.5473	8.35746	8.50385	8.92319
E11 Pancreatic Progenitor	1424569_at	Ddx46	10.3357	10.4313	10.5879	10.6404	9.98238	9.99351	10.2957	10.3171	10.4111	10.322	8.86805	9.14128	9.05742	9.20689	9.77692	9.76022	9.98038	8.97734	8.9436	8.82685	8.50548	8.73826	8.77398	9.04173	8.75618	9.13209	9.34101	9.1395	9.03404	9.28985	9.45193	9.51649	9.47591	9.52491	9.59907	9.58749	10.1459	9.94128	9.23558	9.22201	9.15229	9.28924	8.91296	8.95729	8.90267	8.88101
E11 Pancreatic Progenitor	1433879_a_at	Mapk1ip1l	12.1347	12.3712	12.4741	12.4415	12.1424	12.0919	12.111	12.2378	12.1231	12.3555	11.1278	11.0598	11.1062	10.6649	12.1296	12.1146	12.105	11.1936	11.1941	11.4891	11.4141	9.63213	8.16465	10.4374	10.575	10.6671	11.9758	11.9523	11.9702	11.9765	11.3022	11.58	11.5287	10.9112	11.4859	11.4169	11.6804	11.5791	11.4744	10.8413	10.5779	10.1669	9.99379	10.5749	10.5047	10.7588
E11 Pancreatic Progenitor	1449643_s_at	Btf3	13.3234	13.5552	13.5387	13.6188	13.3974	13.2583	13.5119	13.5685	13.1508	13.6339	12.2355	12.1966	12.1817	11.9396	13.1214	13.1873	13.5587	12.2636	12.2952	12.3899	12.1393	11.3237	11.113	11.6594	11.655	12.0607	13.3681	13.1422	13.2364	13.1445	13.0524	13.2373	13.3061	12.6594	13.2458	13.0552	13.0196	13.1849	12.9342	11.5996	11.2506	11.0481	11.1671	11.5399	11.1522	11.0446
E11 Pancreatic Progenitor	1430274_a_at	Stard3nl	9.28718	9.2298	9.47563	9.54822	8.81595	8.72356	9.60927	10.003	9.07053	10.2003	8.04449	8.04392	8.12137	7.47504	8.25911	8.10135	8.60653	7.65944	8.05839	7.94302	7.72017	7.0092	6.54389	7.48404	7.62321	7.31538	9.80443	8.87071	9.02524	8.91564	8.64146	8.9531	8.87469	7.85828	9.09388	8.83471	8.67202	8.76427	8.90889	7.36322	7.58535	7.92195	7.56141	7.96589	6.97241	6.64133
E11 Pancreatic Progenitor	1434211_at	Sh3bgrl2	7.74404	7.94283	7.74465	7.69239	7.7612	8.63435	7.96562	9.11333	8.3625	9.26117	7.38025	7.05954	6.97044	6.90521	6.95306	7.12874	7.40954	6.90821	6.55189	6.76879	6.84553	6.69138	6.65991	6.77511	6.83061	6.9518	7.20734	6.85691	5.92844	6.33606	5.61949	5.68021	5.28517	6.16186	6.81774	6.31367	6.78286	6.04906	6.40765	5.25444	4.95693	5.71143	5.94702	5.56271	5.61387	5.88802
E11 Pancreatic Progenitor	1429601_x_at	Mthfd2l	10.2664	10.4024	10.0865	10.0072	9.50762	9.20976	9.56854	8.886	9.16101	9.2579	9.13962	9.4351	9.19921	9.29927	9.74935	9.96691	10.2264	8.76548	8.77776	8.75368	8.48183	8.42938	8.27785	8.35486	8.39164	9.13807	9.0833	8.9278	8.82611	8.93725	9.18538	8.94451	8.5692	8.59288	8.76741	8.46809	7.61442	7.61552	8.09133	8.04288	7.72736	7.70131	8.40279	8.32339	8.33049	7.68298
E11 Pancreatic Progenitor	1447818_x_at	Rhebl1	8.61711	8.41151	8.31108	8.36336	6.65112	6.51611	6.68621	6.35895	6.49191	5.79636	6.81533	6.91912	7.11068	7.07703	7.51026	7.39307	7.39383	8.06302	7.84853	8.1661	7.75224	8.99165	7.97193	8.32939	8.14954	7.74122	6.9249	7.00148	6.93988	7.01901	6.89164	7.47291	7.66462	7.42312	7.2792	7.4257	11.3804	6.99447	6.93483	7.68603	7.38176	8.00341	7.18147	6.88928	6.68452	7.83796
E11 Pancreatic Progenitor	1415789_a_at	Ublcp1	8.30647	7.9074	8.19345	8.06518	7.54646	7.76371	7.38924	7.32154	8.08164	7.87005	6.38305	6.22106	5.85174	5.91384	7.61745	7.72704	7.75761	5.96377	5.62489	5.92944	6.07384	5.17204	3.99247	6.72622	6.37048	6.06859	6.9127	7.66332	7.54072	7.40646	7.00826	6.96361	6.67104	6.88875	7.60563	6.9073	8.16992	7.90062	7.35602	7.27228	7.5442	7.22319	7.06237	7.0115	7.13853	7.09264
E11 Pancreatic Progenitor	1417984_at	Ube2v2	8.23536	8.40138	8.33306	8.14586	7.31709	7.41109	7.77384	7.64589	7.74487	7.78154	8.33066	7.9151	7.88343	7.27734	7.74214	7.5357	8.12259	7.04442	7.11556	6.95456	6.38329	5.00514	4.06699	6.85676	6.89245	7.11534	8.01732	8.10032	7.92029	7.61122	8.35271	7.53216	8.91454	6.9069	7.33268	7.02133	8.87678	7.9411	8.17033	6.23765	5.83409	6.1724	6.6009	6.59789	5.62956	6.46688
E11 Pancreatic Progenitor	1442067_at	Ror1	8.06199	7.89524	8.29677	8.14405	6.8261	6.45003	6.58731	4.86002	5.10949	5.18477	7.54774	7.68396	7.55343	7.66762	5.81737	5.50668	5.11437	6.27297	6.95056	7.25643	6.85571	5.48933	6.40225	7.74659	7.64335	7.63241	6.32466	7.28988	7.49179	7.4962	7.99288	7.64615	7.6619	7.58905	7.0419	7.81723	7.78465	6.85998	6.85074	7.47451	7.37893	6.79722	7.59441	7.73027	7.16325	7.16186
E11 Pancreatic Progenitor	1452987_at	Taf1d	8.83957	8.44239	8.80074	8.82304	8.66252	8.35809	8.18766	9.08764	9.03472	9.76075	8.12731	7.47868	7.73023	7.42189	7.42152	6.89008	6.95095	6.75774	7.60589	7.05767	7.15692	5.61625	4.73338	6.98296	6.77222	7.72882	7.18356	7.50134	7.44781	7.40445	6.92969	6.99816	6.86672	7.43874	7.11588	7.5602	7.94385	8.48267	7.67568	7.68077	7.58511	7.1489	6.8197	6.50862	6.70762	6.85393
E11 Pancreatic Progenitor	1450401_at	Tgs1	10.5449	10.3551	10.64	10.5707	9.47659	9.44182	9.58191	9.57724	10.1192	10.0473	9.31474	9.01969	8.9323	9.19315	9.43941	9.40059	9.48307	9.54812	9.52286	9.46972	9.1921	8.38811	9.47335	8.95593	8.78424	8.70325	9.38272	9.66005	9.60291	9.5006	8.73685	8.76843	8.92202	9.45707	9.39379	9.37983	9.68847	9.04501	8.88035	9.25209	9.46261	9.31899	9.38994	9.22584	9.19305	9.16633
E11 Pancreatic Progenitor	1425617_at	Dhx9	12.265	12.2829	12.1148	12.4763	11.8951	11.6893	12.2332	11.986	11.886	11.8938	11.324	11.158	11.1094	11.0749	11.3089	11.4796	11.7418	11.338	11.696	11.4554	11.3785	10.3596	10.321	10.718	10.6629	10.4306	11.5336	10.8286	11.2811	10.6477	11.7949	12.0658	11.6819	11.2609	11.4829	11.4574	12.477	12.3412	12.0556	10.8421	10.2937	10.6503	10.3923	10.352	10.0818	10.144
E11 Pancreatic Progenitor	1416390_at	Rcbtb2	8.25113	8.1615	8.54762	8.148	7.50134	7.39565	7.84991	6.41803	6.90285	6.83825	6.94282	7.26811	6.93724	6.65632	7.00447	7.24904	7.37524	7.31168	6.91316	6.89586	7.04342	7.26721	5.56484	5.72265	6.03984	5.07324	6.6667	6.36526	6.40481	6.15119	6.39901	6.34022	6.34452	6.47288	6.92312	6.86091	5.17721	5.7763	6.57865	6.65585	6.8627	6.7899	6.96394	6.90948	6.85876	7.00169
E11 Pancreatic Progenitor	1417328_at	Ercc1	11.1036	11.0197	10.8113	10.8299	10.5673	10.4242	10.4	10.0829	10.484	9.96265	10.24	10.319	10.3632	10.4725	10.1984	10.1827	10.4412	9.34593	8.76647	8.40173	8.4434	9.85642	9.26959	9.68148	9.42506	8.99398	10.0106	10.2424	9.95396	10.0746	10.4	10.3901	10.2159	10.4209	10.5315	10.4498	10.2519	9.6645	9.78602	9.62297	9.61875	9.74852	9.73235	9.73832	9.59242	9.37933
E11 Pancreatic Progenitor	1417519_at	Plagl2	9.57507	9.26174	9.58977	9.58902	9.73989	9.54569	9.11192	9.38577	9.89914	9.73813	9.22215	8.4483	8.68071	8.59186	9.07896	8.86547	8.62312	8.66868	8.44304	8.21597	8.14102	7.49739	6.30222	7.47963	7.8296	7.54526	8.67962	9.13745	8.77833	8.85705	7.6558	7.81327	7.84374	8.31637	8.17601	8.00153	8.10323	7.54941	7.72048	8.25154	8.38874	8.64672	8.31304	8.12897	7.89144	7.80288
E11 Pancreatic Progenitor	1454709_at	Tmem64	10.4973	10.6595	10.8205	10.8354	10.7564	10.6952	11.1863	10.2077	10.2121	10.5069	10.37	9.88102	9.98946	9.22582	9.59595	9.5795	10.0054	10.0038	9.69707	9.76876	9.64847	8.51389	8.3514	8.75085	8.97329	9.6252	9.53375	9.49805	9.58366	9.68283	10.1018	10.0902	9.97282	9.96713	10.6208	10.1939	7.73734	10.2335	10.1621	8.78744	8.58582	8.72614	8.80475	9.20149	8.95309	8.89237
E11 Pancreatic Progenitor	1421935_at	Rps20	7.81211	8.09471	7.77207	8.02563	7.35608	7.51773	7.42955	7.42405	8.04619	8.22682	7.36527	6.96064	7.39046	6.73398	6.79003	6.87702	7.46209	7.37661	8.75451	8.56523	8.1188	6.01598	5.8343	6.98714	6.49951	7.02647	7.22357	7.0727	7.20756	7.01246	6.40483	7.46003	6.88277	6.92429	7.15454	6.60576	4.80022	6.02721	6.27382	5.48243	6.34809	5.44573	4.8944	5.28523	5.8005	5.1253
E11 Pancreatic Progenitor	1425177_at	Shmt1	9.70894	10.0966	9.68122	10.1112	9.76316	9.28742	10.2335	9.79042	9.15915	10.7193	7.38077	8.05767	7.90556	9.27774	7.8489	8.00834	8.37132	8.20744	8.40711	8.04428	7.96139	9.0751	8.27593	7.66038	7.95332	8.10921	7.96576	7.84875	7.38911	7.7145	7.30328	7.11895	6.92648	8.71215	8.21891	7.9377	8.32761	7.83136	7.75833	7.98819	7.62671	7.39032	7.14631	7.13351	7.70088	8.10171
E11 Pancreatic Progenitor	1419682_a_at	Trp53rk	8	7.91519	7.62675	7.72897	7.41133	7.35648	7.52935	7.30021	7.69455	7.4363	5.66516	5.59645	5.96416	5.89262	7.15141	7.12515	7.54925	5.95197	6.32094	6.48519	6.06431	5.60563	6.74901	6.06855	5.37791	5.91742	7.05178	7.34161	7.03087	7.34739	6.93384	7.11555	7.33593	6.64533	6.93268	6.40229	6.84153	6.38466	6.55109	6.57154	6.74153	6.62909	6.13874	6.48078	5.91604	5.63619
E11 Pancreatic Progenitor	1433751_at	Slc39a10	11.2157	11.4211	11.5567	11.5221	11.936	11.8487	12.467	11.0188	10.8462	11.2132	9.88994	9.60393	9.67646	9.20168	10.4293	10.5073	10.6458	11.2097	10.554	11.112	11.1373	8.50651	8.70257	8.53733	8.93839	9.3508	11.2227	10.6224	10.8289	10.8567	10.9843	10.9945	10.8726	10.7745	11.4162	11.3251	10.0614	10.305	10.3694	9.78749	9.05489	9.10864	9.0695	9.33559	9.59971	9.7419
E11 Pancreatic Progenitor	1428826_at	Nr6a1	8.38647	8.13652	8.51107	8.28052	7.23945	7.26987	7.5337	7.00584	7.35997	7.60976	8.95893	8.12785	8.2026	7.73846	7.85839	7.62317	7.8821	6.66253	7.07113	7.01975	6.71933	6.9225	6.35695	8.34383	8.39961	8.37959	7.38615	7.72018	7.72507	7.445	6.32158	7.51554	7.60407	5.94279	5.84601	6.33949	5.78053	6.62438	7.22415	7.44805	7.54669	7.01917	6.97139	7.34527	6.78506	6.91584
E11 Pancreatic Progenitor	1434574_at	9430008C03Rik	10.0225	10.373	9.98212	10.1849	9.37179	9.72822	9.45372	9.61122	10.2966	9.5298	8.88617	8.57055	9.03821	9.16459	8.38082	8.50989	9.15991	8.30957	8.01537	7.94089	7.96472	9.06321	9.13019	8.83656	7.99513	7.96672	7.99397	8.22781	7.86258	8.1048	8.98567	8.95607	8.8906	8.70215	8.72442	8.44821	9.19617	8.42298	8.60637	8.55986	8.83647	8.68048	8.6817	8.32137	8.15815	8.12069
E11 Pancreatic Progenitor	1422461_at	Atad3a	10.629	10.5136	10.2732	10.3804	10.1036	10.1906	9.8059	10.68	10.7864	10.3205	8.95586	8.87959	9.07321	9.23312	9.14418	9.15757	9.34924	9.00111	9.25556	8.77323	8.8027	9.60958	9.67435	9.34315	9.2599	9.20435	9.07553	9.27379	9.18729	9.11964	9.55605	9.2171	9.18598	9.24474	9.3288	9.04007	9.36357	8.32351	8.42623	8.70503	8.88964	9.18249	8.9642	8.83084	8.975	8.80724
E11 Pancreatic Progenitor	1456644_at	5730528L13Rik	7.6676	7.85915	7.73034	8.06083	7.58219	7.37035	7.76953	6.67899	7.20854	7.29443	6.81192	6.93306	6.6608	6.46585	7.13934	7.12667	7.55263	6.65273	6.16901	6.84119	5.89103	7.71877	7.79164	6.05778	6.66326	6.11366	6.50547	6.33578	6.43925	6.63646	6.72296	6.65118	6.92157	6.58875	6.90187	6.7458	6.25167	5.36516	5.76771	5.42851	6.01049	5.78334	5.69669	5.81334	5.73489	8.07787
E11 Pancreatic Progenitor	1429620_at	8430406I07Rik	7.71786	7.93042	7.68359	7.60331	7.12956	7.47836	7.44163	7.51483	7.84393	7.44119	6.67471	6.4284	6.47868	7.06644	5.87609	6.42879	6.47045	6.5858	7.15703	6.70785	7.48356	6.66542	6.76254	6.94898	7.01858	6.42988	6.32464	6.55784	5.79905	6.22178	5.9701	6.30137	7.19784	6.41714	6.62459	6.60768	6.72101	5.92039	6.3026	6.76782	6.20106	6.5409	7.05654	6.62201	6.40677	7.34797
E11 Pancreatic Progenitor	1429456_a_at	Polr3e	10.0457	10.2682	10.1185	10.3499	10.0506	9.96643	9.9717	10.0641	10.1453	10.0722	8.47471	8.49416	8.74408	8.78402	9.10149	9.21115	9.50038	8.43294	8.57373	8.56681	8.91287	9.09666	8.77328	8.68932	8.48729	8.77845	9.26538	9.24683	9.3281	9.39628	9.45322	9.19598	8.88167	9.23555	9.35385	9.09319	9.88132	9.1075	9.05851	9.20001	8.99572	9.02394	9.1021	9.07284	9.07874	8.95415
E11 Pancreatic Progenitor	1431082_a_at	Rabl3	8.50037	8.87936	8.6821	8.86384	8.23234	8.56903	7.74475	8.18326	7.95181	8.14992	6.80144	7.00966	6.7917	6.43206	8.47549	8.00421	8.47127	7.54413	7.65215	7.95058	7.83136	5.82884	5.97582	7.35952	5.78829	7.05882	8.48092	7.75817	7.84779	8.49507	8.13865	8.31039	8.21346	6.60059	7.02989	7.3824	7.59994	7.75933	8.06323	7.2668	7.13836	7.6261	7.75945	7.63951	7.22127	6.59991
E11 Pancreatic Progenitor	1425899_a_at	Itsn1	8.16153	8.54538	8.58004	8.69281	7.68502	7.55997	8.18988	7.2897	7.54208	7.59234	7.92583	7.49564	7.3833	7.73425	6.83411	7.19434	7.7384	5.25068	4.8926	5.2931	6.09651	5.69783	6.03275	5.71844	5.93474	5.88892	7.38305	7.28051	7.30119	7.29102	7.78686	7.50366	7.83357	7.14457	7.72864	7.94846	6.2849	6.69572	6.56301	6.27617	6.31362	6.49778	6.63553	6.79144	6.1208	5.98641
E11 Pancreatic Progenitor	1448563_at	Phb	10.9739	10.8124	10.6629	10.6181	10.5574	10.6165	10.4225	10.5989	10.9523	10.3985	9.30119	9.79682	9.27604	9.53569	9.2151	9.32568	9.62097	8.94736	9.05656	8.44972	8.97754	10.1634	9.7087	9.15415	9.34814	8.10249	9.23024	9.61768	9.50662	9.35243	9.74506	9.47236	9.28015	9.58133	9.75809	9.67599	10.7371	9.06197	9.52886	9.56171	9.67473	10.0666	9.77039	9.61787	9.63427	9.51767
E11 Pancreatic Progenitor	1426518_at	Tubgcp5	9.2801	9.38669	9.4891	9.59346	9.46033	9.12805	9.53253	9.05122	8.97698	9.2754	6.57732	7.46089	6.90968	6.11184	8.98236	9.02285	9.14345	8.55982	8.48542	8.79874	8.33541	9.10304	6.55835	8.55739	7.89759	8.56067	9.39773	9.15829	9.20666	9.42288	9.0778	9.17221	9.17382	8.35081	8.84525	8.78881	7.0223	9.32577	9.10038	8.15889	7.93121	7.24232	7.52585	7.93103	7.84893	6.8823
E11 Pancreatic Progenitor	1450762_s_at	Zfp191	7.86075	8.13671	8.18631	8.17593	8.08585	7.80134	7.882	6.57759	6.5363	7.33293	6.55305	7.3223	6.77346	6.73293	7.45427	7.46826	8.15126	6.23814	7.80249	7.26777	6.35762	6.69524	7.04809	5.77219	7.07363	6.39371	7.5059	8.03237	8.37242	7.6238	6.2204	7.86146	8.14032	6.14341	7.13779	7.1127	8.60275	7.85331	7.90388	6.24669	6.63462	6.22137	7.02543	5.72972	6.08048	5.69781
E11 Pancreatic Progenitor	1435421_at	Fsd1	8.75856	8.91217	8.58613	8.60253	7.25911	7.40633	6.8008	7.32698	6.96344	7.12615	6.39892	7.08921	7.25523	7.44146	7.41384	7.4545	7.08132	7.14156	7.2864	7.05885	6.89386	8.2434	8.06167	7.75552	8.08469	7.98955	7.76213	8.07263	7.75221	8.20407	7.44004	7.82835	7.73281	6.84612	6.90766	6.91277	8.39301	6.82589	6.99017	7.63646	7.36094	7.47653	7.26	7.1515	7.46621	7.38051
E11 Pancreatic Progenitor	1460001_at	Pgpep1	10.71	10.4402	10.3787	10.3909	9.2921	9.4788	9.20291	9.3435	9.0055	9.42406	8.74928	9.05993	8.83235	8.74676	9.1045	9.46561	9.37343	9.64368	9.86917	9.9511	9.98072	9.36718	9.05801	9.78299	9.66437	9.58058	8.85019	9.40519	8.66005	9.26656	8.62651	8.48629	8.7042	9.18776	8.86276	8.2369	9.60721	8.53517	9.27282	8.30585	8.45567	8.87125	8.66547	8.68766	8.81209	9.25098
E11 Pancreatic Progenitor	1417062_at	Armc10	11.089	11.2815	11.276	11.4675	10.7477	10.55	10.9362	10.3528	10.3519	10.2875	9.33776	9.60778	9.62021	9.19747	10.8248	10.8783	11.0958	10.414	10.6705	10.8675	10.3884	9.14657	9.52102	9.59846	9.45294	9.33773	10.6176	10.832	10.1488	10.6539	10.2867	10.4463	10.7704	10.2868	10.4892	10.4856	9.2656	11.0969	11.4127	10.115	10.1197	10.1618	9.56498	10.0568	9.9681	9.62708
E11 Pancreatic Progenitor	1415998_at	Vdac1	11.483	11.7886	11.7338	11.883	11.5302	11.466	11.2909	11.226	11.237	11.5698	9.87769	10.1352	9.93947	9.55278	10.9819	10.9396	11.2621	11.2352	11.1168	11.2198	11.0126	10.4932	8.78847	9.53606	9.64546	10.0965	10.977	10.4707	10.8174	10.7081	10.8498	11.3557	11.3208	10.2979	10.7923	10.747	11.5116	11.1311	11.1737	10.1852	10.1877	9.69277	9.77167	10.0922	9.8117	9.31593
E11 Pancreatic Progenitor	1443227_at	Bzw2	8.21155	7.96704	8.30587	8.07411	7.38587	7.37365	7.36623	7.32859	7.50328	7.67633	7.90054	7.48928	7.69691	7.6807	7.22686	7.28637	6.66978	6.4857	6.5979	6.10705	6.60624	6.37243	6.98496	7.08451	6.63984	7.00215	6.66515	6.80604	7.21752	7.07698	6.85151	6.55854	6.57725	6.81365	6.60911	6.42377	8.64898	6.69595	6.679	7.16388	7.56652	7.08423	6.78041	6.59689	6.8287	6.65829
E11 Pancreatic Progenitor	1442289_at	Taf1d	7.90588	7.95327	8.15206	8.25462	8.51913	8.3759	7.69795	9.76428	8.99069	9.65868	7.34265	6.87151	7.12782	6.75963	6.70927	6.57372	6.82766	7.02146	7.41122	7.36235	7.46903	5.53064	6.50174	6.37825	6.47365	6.04796	6.15477	7.35977	6.30458	6.12355	6.72009	6.53022	6.61015	6.48231	6.47251	6.4613	7.98488	6.69607	6.35364	7.0006	6.78695	6.12308	6.1119	6.28919	6.40702	5.91828
E11 Pancreatic Progenitor	1451631_at	Rprd1a	8.44163	8.21562	8.2959	8.58372	7.99647	7.84031	8.23614	7.73105	8.21061	8.10736	6.83875	7.10404	7.20397	6.75733	7.44821	7.54665	7.93382	5.94045	6.89454	7.4514	7.04401	5.76442	7.86713	6.57329	6.53943	6.20137	8.08813	8.00016	8.02278	7.91326	7.04971	7.72743	7.65944	7.10353	7.22933	7.33334	8.10883	7.03918	7.30137	7.03659	6.94499	6.91257	6.58458	6.65198	7.19992	6.94813
E11 Pancreatic Progenitor	1433838_at	Dars2	9.79043	9.83683	9.54039	9.54438	9.52704	9.70385	9.63729	10.6986	10.4444	10.0021	7.75228	8.23157	7.96879	8.06998	8.29308	8.18923	8.50548	9.02783	8.82208	8.71114	8.92211	8.41189	8.77593	8.93964	9.00614	8.33296	8.38553	7.97127	8.21468	8.27162	8.2955	8.5111	8.34765	8.2066	8.2735	8.30537	8.58258	8.34766	8.38473	8.3124	8.44542	8.53642	8.65565	8.37304	8.26276	8.51572
E11 Pancreatic Progenitor	1441079_at	Mbd4	8.83947	9.25154	9.03868	9.13813	8.55617	8.35966	8.78008	8.57129	8.30468	8.49612	7.26465	7.54125	6.7344	6.7154	8.27437	8.38239	8.66499	8.14534	7.92054	7.67877	7.44799	7.80663	7.47407	7.61555	7.45694	8.04182	8.01307	7.88936	7.34022	7.61093	7.56413	8.30424	8.19131	7.75645	8.33613	8.45403	7.07822	7.69781	7.12216	7.18704	7.28256	6.82225	7.15177	7.39011	7.095	7.02984
E11 Pancreatic Progenitor	1436535_at	Trove2	9.09679	8.89786	9.31341	9.13208	7.35954	7.39057	7.46221	7.407	7.35945	8.42559	8.26827	8.41673	7.98475	7.26932	8.46584	8.02581	7.76745	8.25172	8.0554	8.50149	9.1331	6.12576	6.29656	9.12045	8.79298	8.60452	8.89817	9.24248	9.40239	8.65475	7.817	8.80858	9.04644	7.28169	8.19937	8.04797	5.42576	8.59205	9.07257	8.2101	7.96789	7.45113	6.85375	7.98347	7.13529	8.0531
E11 Pancreatic Progenitor	1417959_at	Pdlim7	9.46494	9.27131	8.98114	9.18056	8.35029	8.08498	8.47644	7.31232	7.37277	7.1628	9.19292	8.84253	8.92394	8.68502	8.73322	8.42873	8.60035	7.18092	7.43973	7.30553	7.26618	6.65377	6.70757	7.29275	7.0433	7.00471	8.39804	8.85941	8.80706	8.64031	8.97084	8.88457	8.43574	8.33999	8.53389	8.45408	7.49325	7.24049	7.22732	6.9525	7.26368	7.14382	7.27203	7.07517	7.54921	7.56444
E11 Pancreatic Progenitor	1428656_at	Rnasen	11.9663	11.9132	12.1256	12.1583	11.5003	11.3925	11.439	11.2041	11.5443	11.2713	10.3735	10.872	10.8711	10.8282	11.3161	11.3231	11.3506	10.8522	10.8629	10.8154	10.6375	11.2844	10.8859	11.1315	10.7832	10.7941	11.3594	11.2597	11.219	11.482	11.1548	11.2366	11.247	11.0226	10.9354	10.7226	9.83385	10.5538	10.7434	11.0425	10.9809	11.1722	11.0428	10.8723	10.6012	10.7948
E11 Pancreatic Progenitor	1460338_a_at	Crlf3	8.05219	8.3893	8.19289	8.40143	7.96013	7.87205	8.23695	7.79297	7.55755	8.22496	7.78049	7.15913	6.58878	6.90084	7.01784	7.20492	7.34121	6.99461	6.97638	6.9693	6.85724	6.63035	6.31112	6.66483	7.05395	6.75148	7.66326	7.37259	7.31179	7.05729	7.57995	7.89683	7.72085	7.32276	8.2551	8.12699	7.96055	8.71012	7.07552	5.88944	5.55515	6.25907	6.30375	6.43261	6.80275	6.11396
E11 Pancreatic Progenitor	1420507_a_at	Sfrs12ip1	7.49955	7.92483	7.8502	7.85531	7.76722	7.77808	8.30558	7.26746	7.35896	7.99968	6.21811	6.40884	5.73759	5.25363	6.97422	7.08623	7.63566	6.02825	5.93217	5.8716	6.1665	5.64465	5.9658	6.16383	6.24246	5.68784	7.1473	7.05769	7.18879	7.19902	7.07246	6.7698	6.90545	5.86398	6.66578	6.60741	5.05265	6.50704	7.34202	5.7969	5.7575	6.20073	6.1769	6.07566	6.18698	6.09613
E11 Pancreatic Progenitor	1432059_x_at	5031425E22Rik	7.79438	8.15629	8.05008	7.76913	6.71705	6.23093	7.03406	6.02175	5.70916	5.8661	6.3555	5.71979	5.7717	5.03643	7.09596	6.6921	7.7956	6.48575	6.25697	5.54433	5.40809	7.49356	6.11406	6.97773	6.44903	6.51073	7.0502	7.95186	7.59003	6.6695	6.31728	7.91258	6.62034	7.35335	7.18833	6.20988	7.92318	7.19347	7.37119	6.97928	7.33733	7.49769	7.29404	6.73115	6.45763	6.45732
E11 Pancreatic Progenitor	1428944_at	Uba6	8.89143	8.65386	9.02537	8.85728	8.24253	8.18353	7.76654	7.21433	7.27531	8.4302	8.96723	8.9469	8.55059	7.63663	8.08659	8.35238	8.47904	7.52679	7.65433	7.8794	8.20721	7.14954	3.71426	8.11771	8.37225	8.63636	8.5001	8.86506	9.1959	8.47718	7.29418	7.99689	7.90693	6.70243	7.38853	7.50995	5.89313	8.46071	8.76336	7.58631	7.28481	5.67496	7.05883	7.78197	7.37746	8.28501
E11 Pancreatic Progenitor	1448348_at	Caprin1	8.90074	8.61271	8.97491	9.09591	8.58527	8.33909	8.60415	8.23754	8.43218	8.54739	7.02407	6.86946	6.91492	6.77394	8.66285	8.35655	8.43988	6.81145	7.20528	6.89213	6.90995	6.26397	6.29559	6.76556	6.51606	6.3491	8.04317	8.16581	8.18485	8.27992	7.48552	7.89444	7.75719	7.74893	7.77264	7.45482	7.90179	7.71715	8.03271	7.51764	7.4741	7.43685	6.95667	7.45775	7.17027	5.99001
E11 Pancreatic Progenitor	1449122_at	Ubxn2b	8.81009	9.05119	9.02389	9.23517	8.83995	8.56649	9.05958	8.29175	8.53823	8.70233	6.80265	6.87456	7.24469	6.60483	8.44753	8.41492	8.77879	7.96228	8.30438	7.96579	7.51998	7.03138	7.25471	8.45026	8.42664	8.69513	8.49394	8.34288	8.81766	8.42355	8.18544	8.00807	8.16405	7.79315	7.64539	7.85433	5.80318	8.54086	8.65215	7.87167	7.51261	7.16315	7.47589	7.53329	7.10114	7.51649
E11 Pancreatic Progenitor	1428566_at	Hspbap1	9.02128	9.15308	9.11463	9.46406	8.46972	8.44572	8.50105	8.66801	9.19345	8.46747	7.37865	6.9493	6.95408	6.70089	8.53202	8.25737	8.22414	7.73221	7.97834	8.36861	7.11759	7.45957	7.55859	7.27671	6.85727	7.60584	7.89582	8.09918	7.94972	8.16019	7.90918	8.02841	7.8643	7.62909	7.4652	7.27867	10.0779	7.90611	7.89374	7.94675	7.89139	7.7037	7.69084	7.54357	7.5955	6.86699
E11 Pancreatic Progenitor	1418023_at	Naa15	11.4479	11.1196	11.3952	11.1254	10.6597	10.8423	10.2629	10.535	10.7033	11.1084	10.9804	10.5649	10.6744	10.5666	10.6445	10.7119	10.543	9.50785	9.85814	10.0223	10.1977	7.6319	7.77802	10.312	10.2937	10.2393	10.5867	11.0012	11.0073	10.791	10.2063	10.4312	10.1315	9.76468	9.92081	9.89607	8.72437	10.2382	10.4504	10.4117	10.2035	10.029	9.52055	10.0506	9.97791	10.1078
E11 Pancreatic Progenitor	1431618_a_at	Pibf1	8.64172	8.76278	9.00568	8.99879	8.16158	7.9048	8.54572	8.14183	7.99225	8.17341	7.33242	7.36432	7.69848	7.64863	8.31779	7.93048	8.50605	7.61865	8.01524	7.47108	7.22644	6.08168	6.80653	7.26726	7.06619	7.05013	8.6226	8.50763	8.29237	8.4943	7.3943	7.67779	7.91909	7.62709	8.23843	8.09256	8.40939	7.82853	7.96251	6.65071	7.2782	6.70795	6.87602	6.86299	6.91418	6.64519
E11 Pancreatic Progenitor	1416568_a_at	Acin1	10.6994	10.5256	10.8409	10.8328	10.6406	10.4462	10.8537	10.3992	10.4276	10.327	8.88827	9.17273	9.11329	8.78976	10.743	10.4577	10.4869	7.85829	7.96843	7.61266	7.25538	8.84699	7.92474	8.4812	8.44331	8.9694	10.2894	10.2895	10.2584	10.4057	9.67331	9.74557	9.87006	10.1526	9.98182	10.101	10.7857	9.71142	9.57631	10.451	10.5953	10.6506	10.3355	10.4781	10.1313	10.0527
E11 Pancreatic Progenitor	1456653_a_at	Mthfd1l	10.8287	10.8201	10.52	10.6704	10.1844	10.1276	10.0738	10.4694	10.621	10.7963	7.34099	7.08219	7.88914	7.66953	8.90981	8.88892	8.98012	9.60137	10.0572	10.2113	9.59562	9.23143	9.26586	8.97656	8.55862	7.64491	10.0234	9.97315	9.64773	10.2026	9.92892	10.0693	10.1082	10.1211	9.9238	9.92165	11.3444	10.4989	10.6424	10.6461	10.6789	10.5629	10.042	9.92641	10.225	10.2831
E11 Pancreatic Progenitor	1440205_at	Zmynd19	8.34539	8.43948	8.10674	8.10231	7.6128	7.48348	7.56359	7.78548	8.4075	8.01372	6.40622	6.11451	5.87445	6.174	6.5574	6.5911	7.38834	6.96802	6.99407	7.07443	7.15725	7.41154	8.0848	7.22566	7.38428	6.68661	7.19302	7.27047	7.66081	7.198	6.82158	7.22502	6.96736	6.58082	6.48228	6.49333	7.41498	6.07442	6.73398	6.87866	6.95202	7.35211	7.14382	6.88776	6.59407	6.99328
E11 Pancreatic Progenitor	1436002_at	Scube3	9.74791	10.2509	10.2379	10.4513	8.58266	8.259	8.73791	6.46446	6.00159	5.85932	6.89229	6.68894	7.33286	7.33588	6.82509	6.8927	7.23607	6.82813	6.05842	6.20275	6.31863	6.54678	6.90869	6.06102	6.10435	6.26041	7.32008	6.97206	6.96379	6.87289	7.38368	7.01018	6.75147	6.92957	7.0363	7.10383	6.95716	6.26273	5.82813	6.75414	6.19783	6.15422	7.63295	7.90769	7.63971	7.37813
E11 Pancreatic Progenitor	1449700_at	Igbp1	10.6528	10.8636	10.924	11.0117	10.616	10.6994	10.591	10.6795	10.6803	10.7482	10.0753	10.3811	10.3223	10.2602	10.417	10.437	10.7382	9.9101	9.85723	9.76769	9.58549	9.38034	9.91419	9.52957	9.48586	9.32525	9.90509	9.52495	9.4499	9.61862	9.86828	9.89586	9.97219	9.58133	10.0312	9.93993	8.38893	9.63968	9.53532	9.26421	9.25784	9.04392	9.62672	9.62447	9.37172	9.12562
E11 Pancreatic Progenitor	1455220_at	Frat2	7.97601	8.36165	8.02875	8.15439	7.64113	7.41814	8.17448	7.25866	7.19953	7.28316	9.74752	9.39041	9.11113	8.12938	7.41061	7.40215	8.0572	7.00898	7.06797	7.47703	6.52881	6.08435	6.46691	5.78229	6.66929	6.67074	7.18575	7.12022	6.19253	5.7564	7.2276	8.16989	7.46624	6.20758	7.32918	7.31348	7.37071	6.42846	6.13658	6.36458	5.63989	5.73835	5.96222	5.83591	6.13209	6.21497
E11 Pancreatic Progenitor	1415868_at	Cct4	9.61435	9.19376	9.50465	9.38645	8.88606	8.70601	8.19047	7.94458	8.55165	8.84699	8.3012	8.4287	8.4753	7.89732	9.18869	8.70552	8.72289	8.01208	7.80217	7.87421	8.09017	6.50899	8.37383	8.46389	9.44475	7.88628	8.25404	8.58834	8.84637	8.36983	9.02397	8.58392	8.66267	7.04544	7.29543	7.09653	8.44529	8.14598	8.31033	7.41272	7.5765	7.65226	7.88144	8.04464	7.72533	8.02358
E11 Pancreatic Progenitor	1415864_at	Bpgm	8.85795	8.96041	9.00832	9.24763	8.21238	8.37276	8.53753	8.98343	8.97989	8.99108	7.70044	7.87005	7.4155	6.96251	8.32888	8.33724	8.74176	7.61983	8.39152	8.34049	7.82955	6.70306	5.08221	6.60272	6.57384	6.2574	9.14416	8.59155	8.57238	8.62504	8.66818	8.76006	8.68737	8.27106	8.34377	8.11401	7.28323	9.21736	9.56773	7.84639	7.96737	7.82142	6.93258	7.58124	7.36451	7.18457
E11 Pancreatic Progenitor	1434770_at	Iqcb1	9.79417	9.96739	10.1537	10.1005	8.70057	8.31138	8.89103	7.95086	8.49527	7.99356	8.91948	8.25536	9.02511	8.51193	9.13503	9.0093	9.04228	8.30367	8.50669	8.30367	7.74148	8.94859	9.20027	8.72833	9.19147	8.47139	8.95894	9.05255	9.26573	9.24152	8.80559	8.82297	8.76715	8.48135	8.43409	8.2197	8.91561	8.43518	8.95853	8.16553	8.18271	7.85097	8.19173	8.32516	7.9718	8.11033
E11 Pancreatic Progenitor	1424353_at	Lrpprc	11.6195	11.6762	11.9948	11.7439	10.7904	10.9291	10.4635	10.6791	11.3339	11.0188	8.91517	8.94825	8.88885	8.97349	11.7455	11.7357	11.5675	11.0124	11.4132	11.5007	11.2861	10.8105	10.2789	10.7339	10.4316	10.4618	11.7907	11.8232	11.7666	12.2755	10.7222	11.365	11.2745	10.8247	10.5835	10.4946	9.16132	10.5986	10.9479	10.8964	10.8515	10.8347	10.3862	10.4549	10.5146	10.3053
E11 Pancreatic Progenitor	1441403_at	6430501K19Rik	8.49145	8.08088	8.39263	8.22236	7.47301	7.58139	7.20586	7.46037	7.81309	8.47399	6.83231	6.21996	6.69694	6.12383	7.73401	7.42498	7.0309	6.49222	6.13728	6.32158	6.34588	5.72871	6.31962	7.64334	7.73528	7.9574	6.9861	7.50374	7.72594	7.4927	7.36123	6.35832	7.07182	6.69086	5.87332	6.68942	8.84425	7.11813	7.30963	7.53393	7.56136	7.79561	7.43617	7.40652	7.433	7.84082
E11 Pancreatic Progenitor	1444235_at	1700025G04Rik	8.33445	8.45596	8.7403	8.76217	7.99485	7.78058	8.11093	7.18742	7.67314	7.3846	6.16141	6.43147	6.89071	7.11276	6.86676	6.74148	6.91143	7.73149	8.39612	8.34315	7.21022	7.95475	7.81935	7.4966	7.06124	6.63034	7.63193	7.45873	7.83702	7.55374	8.58548	8.17395	8.0237	8.01526	8.42302	8.39556	6.61216	7.12252	6.68181	6.19588	6.29824	6.27874	6.21806	6.01011	6.00112	5.40748
E11 Pancreatic Progenitor	1435083_at	Ctxn1	11.3682	11.3431	11.0422	11.0947	10.5645	10.3842	10.6081	8.75584	8.82759	8.51253	10.3067	10.1718	9.97009	10.3207	11.0844	10.9989	10.9474	10.4432	10.3405	10.3147	10.7209	10.0147	10.1576	9.64039	9.9306	9.27777	10.6421	10.8267	10.5007	10.8678	10.6037	11.0645	10.9881	10.0605	9.9346	9.89298	10.3866	8.91964	9.45111	9.85572	9.88991	10.0975	10.1986	10.029	10.3317	10.0934
E11 Pancreatic Progenitor	1450778_a_at	Phax	11.5092	11.4085	11.6785	11.648	10.9663	10.8823	10.8643	10.2965	10.7365	10.6108	10.5005	10.693	10.7157	10.6475	10.9292	10.8597	11.1206	9.98918	10.072	9.92833	9.81759	10.2718	10.499	10.2596	10.1807	10.1635	10.8034	10.5313	10.5774	10.9467	10.4896	10.5949	10.6662	10.5533	10.6915	10.4027	11.343	10.9033	10.9175	10.4272	10.5816	10.1361	10.2798	10.5069	10.2053	9.94071
E11 Pancreatic Progenitor	1430034_at	Cct4	9.51733	9.77554	9.54732	9.25267	8.47331	8.66134	8.26009	7.60175	9.13578	8.85242	8.05611	8.28827	8.3278	8.06691	8.34346	8.54594	9.32313	8.46435	8.95666	9.1863	8.44187	9.24739	9.20375	8.23787	8.62699	8.66245	8.31777	8.44921	8.07531	8.15611	7.82349	8.0862	7.76136	7.10936	7.62745	7.3003	6.76227	6.79622	7.25934	6.89667	7.15658	7.24141	7.96466	7.65417	7.70856	7.73993
E11 Pancreatic Progenitor	1439071_at	5430416N02Rik	10.2666	10.3929	10.0273	10.3726	9.67318	9.88808	9.72465	9.55133	10.0588	9.31894	9.96386	10.1305	10.2293	9.97769	9.46164	9.43798	10.1074	8.74219	8.57493	8.43513	8.36654	8.97479	9.37508	8.92649	8.85074	8.87119	8.78349	9.10232	8.88243	8.95535	10.6137	9.87115	9.47003	9.09287	9.26398	9.29468	9.52813	8.80053	9.00533	8.57978	8.88884	8.70384	8.52511	8.58478	8.78609	8.15174
E11 Pancreatic Progenitor	1428225_s_at	Hnrpdl	10.0587	10.3869	10.3231	10.4197	9.67548	9.94153	9.90545	9.48235	9.81827	9.86361	9.32116	9.52709	9.56583	9.3257	9.33181	9.20696	9.63025	8.92486	8.99221	9.07248	8.8189	8.06518	8.11839	9.01279	9.1968	9.19791	9.37712	9.24736	9.16717	9.21491	9.68698	9.99931	9.79391	8.87259	9.52026	9.49442	9.47354	9.68869	9.51347	8.8198	8.53989	8.48162	8.39596	8.81633	8.34414	8.23729
E11 Pancreatic Progenitor	1452119_at	Rrp1b	9.27865	9.29966	9.08524	8.8867	8.26946	8.39949	8.18072	8.36337	8.83586	8.1718	7.61652	7.6132	7.81835	8.06087	7.29184	7.38043	7.87506	7.02523	6.86442	6.65216	6.68368	7.42678	7.114	7.71168	7.49268	7.72277	6.81658	6.92858	7.20988	6.9896	6.95036	7.60275	7.51554	7.79722	7.58439	7.38522	7.89115	7.22937	6.87723	7.42742	7.42804	7.5874	7.47604	7.5883	7.4219	7.49686
E11 Pancreatic Progenitor	1438493_at	Pld6	7.73759	8.07092	7.60032	7.80606	7.55893	7.61746	6.7508	7.6189	7.4014	8.02051	6.10293	6.03091	6.34636	6.20693	5.95449	5.64197	5.8702	6.89496	6.83044	7.14223	5.9429	5.45137	5.77678	7.04968	7.14165	7.33204	6.57776	6.39599	7.10984	6.95477	6.49725	6.67147	7.33003	6.08058	5.87846	5.6892	5.41962	5.94401	5.95426	6.6818	6.5121	7.07486	6.2035	6.58901	6.35507	6.26901
E11 Pancreatic Progenitor	1423616_at	Tarbp2	10.5622	10.5594	10.2435	10.4368	9.68591	9.73459	9.85652	9.93262	10.1235	9.71205	8.24008	8.60395	8.57127	8.68764	9.47046	9.32415	9.5642	9.5629	9.11809	9.28599	9.61027	9.84835	9.02641	9.41352	9.11996	8.89486	9.35348	9.32438	9.27263	9.37195	9.41391	9.3129	9.25858	9.4456	9.21673	9.40735	9.92406	8.79511	9.14841	8.8853	9.58631	9.23933	9.09096	9.03509	9.0333	8.78388
E11 Pancreatic Progenitor	1417132_at	Cdc25a	11.1101	10.8996	10.7266	10.928	10.4805	10.3728	10.4231	10.4719	10.7128	10.4556	9.61019	9.65455	9.56131	9.45872	9.87223	9.90126	10.1217	10.3955	10.2935	10.2716	10.4417	9.8582	10.2842	9.63802	9.45607	8.80266	9.47336	8.99847	9.25274	9.3753	10.4347	10.2034	10.1587	9.71269	9.28454	9.34453	9.33671	9.11844	9.42807	9.98543	9.8272	10.2562	9.92478	9.80554	9.48848	9.75896
E11 Pancreatic Progenitor	1428563_at	Ddx10	9.43846	9.12526	9.35105	9.55308	8.89343	8.85885	9.40169	9.06436	9.35132	9.49517	8.67432	8.46345	8.49602	8.22358	8.32562	7.82103	8.16191	8.22132	8.04695	7.92082	7.70496	7.16261	6.85208	7.28953	7.38207	7.58654	8.55183	8.2446	8.4077	8.2761	8.17422	7.84925	8.1212	8.11963	8.56277	8.10535	8.7259	8.75644	8.57598	7.96678	8.09038	7.70063	7.63938	7.86718	7.7844	8.11069
E11 Pancreatic Progenitor	1450087_a_at	Nolc1	11.9817	11.5861	11.5573	11.6412	11.2894	11.4719	10.8256	11.3839	11.9681	11.7065	10.5871	10.3998	10.5943	10.8289	10.3164	10.275	10.6436	9.34711	9.98281	9.38916	9.16037	9.79107	9.91109	9.77821	9.62723	9.86412	9.99402	10.4445	10.1312	10.3724	10.5788	10.3099	9.91081	10.44	10.3875	10.1193	11.3147	10.1987	10.3359	10.696	10.684	10.5624	10.3497	10.3165	10.362	10.4111
E11 Pancreatic Progenitor	1422418_s_at	Tpd52l1	11.5122	11.5854	11.2545	11.3131	10.5893	10.6089	10.7269	10.3457	10.5563	10.5438	10.7449	10.8441	10.9723	10.8642	10.4894	10.6066	11.0931	9.93212	9.7095	9.44951	9.74125	9.77903	9.78421	10.061	9.93282	9.93086	9.71486	9.51736	9.44113	9.72529	10.0061	10.1665	10.0545	10.0933	10.4825	10.2828	10.2717	10.6866	10.1607	9.9761	10.0166	10.2561	10.2888	10.3828	10.1573	10.3581
E11 Pancreatic Progenitor	1439826_at	Hspa14	8.82185	9.14099	9.19652	9.02842	8.80189	8.58404	9.13179	8.62563	8.82396	8.48382	7.94036	7.96159	8.10982	8.03418	8.227	8.21966	8.58855	8.1702	8.54552	8.50338	7.53484	7.81281	7.48675	7.68215	7.60582	7.33889	8.02545	7.89403	7.76054	8.12749	7.25272	8.04303	7.8409	7.75386	7.983	7.85173	9.59315	8.06454	7.40791	8.05446	8.36469	7.96197	7.52912	7.11191	7.33276	6.90112
E11 Pancreatic Progenitor	1423612_at	Clp1	8.65736	8.85927	9.05039	9.08871	8.32138	8.29825	8.5745	8.53567	8.59396	8.90421	8.11702	7.51245	7.91165	7.03486	7.68016	7.60426	7.90001	7.75761	7.44773	7.84603	7.24519	6.4733	6.25076	6.92784	7.45517	8.07137	8.26012	8.19353	8.07071	8.19995	7.91869	8.17349	7.80699	7.12029	8.03611	7.29986	6.87029	8.31498	8.54664	7.2244	7.24305	6.29552	6.79216	7.6443	7.26347	7.04391
E11 Pancreatic Progenitor	1423566_a_at	Hsph1	11.2378	11.4245	11.7553	11.453	10.3837	10.327	10.2247	9.27782	10.0394	10.2221	11.0158	11.7649	11.732	11.9769	11.0614	11.0615	11.0187	9.99098	10.6206	10.0967	9.69375	9.32353	8.57746	9.73413	10.1012	10.865	10.7484	10.5009	10.773	10.4554	10.1063	10.986	10.7443	8.67911	8.95857	9.29667	10.7568	11.2808	10.5607	9.49542	9.18453	8.8459	10.1364	10.1308	9.77776	10.0054
E11 Pancreatic Progenitor	1423418_at	Fdps	10.5967	11.0392	10.9081	10.894	10.2745	10.2673	10.2874	10.498	10.8649	10.9026	9.69691	9.16417	9.88264	9.60179	9.50365	9.28616	9.74957	9.25734	9.01148	9.00366	9.2261	8.96175	8.15416	9.07364	8.72471	8.62524	9.98016	9.53439	9.56823	10.1965	9.79138	10.1582	9.8837	10.0055	10.3246	10.505	9.64123	10.2937	10.6399	10.8349	10.1953	9.72967	9.3659	9.58346	9.51999	9.35833
E11 Pancreatic Progenitor	1423970_at	Thoc3	10.9481	11.1208	11.2875	11.4397	10.8721	10.8359	10.7057	10.9465	10.8137	10.9423	8.60124	8.8709	9.16666	9.15719	10.5941	10.5827	10.9925	9.34041	9.31819	9.60101	9.0936	9.70238	9.75316	8.34846	8.8073	9.48195	10.6588	10.828	10.6695	10.91	10.3744	10.7322	10.7074	10.0013	10.3396	10.1446	10.6124	10.11	10.2437	9.81377	9.73713	9.67476	9.34444	9.50531	9.27661	8.84317
E11 Pancreatic Progenitor	1434041_at	Appbp2	7.95859	8.34566	8.40743	8.40327	7.89656	7.79413	7.70086	6.95842	7.03303	7.97492	7.55962	6.74566	7.04927	6.45614	7.89983	7.69196	7.65172	6.40178	6.22696	6.78262	6.43404	5.68408	6.23304	6.30824	6.38867	6.26678	8.21786	8.2649	8.24371	7.91934	6.90782	7.91621	7.79569	6.58359	7.2556	7.17373	7.49188	7.49986	7.22675	6.09176	5.95611	6.62354	5.91427	6.10284	6.1009	6.50476
E11 Pancreatic Progenitor	1426537_at	Narg2	8.99148	9.07889	9.3297	9.34907	8.37354	8.31422	8.47	8.1468	8.41386	8.26262	7.05175	7.49802	7.48663	7.39911	8.03174	8.11269	8.31747	7.92074	7.86013	7.82071	7.74136	7.22931	7.30239	8.25089	7.9355	7.79285	7.93709	8.14078	8.01814	8.11164	7.51996	8.21797	8.07434	7.50471	7.79868	7.81178	8.46155	7.96626	7.62072	7.27905	7.24032	6.80171	6.93907	7.41242	7.13615	7.27576
E11 Pancreatic Progenitor	1448624_at	Cd2bp2	9.47862	9.61437	9.17031	9.39907	9.10169	9.10478	8.97766	9.09077	9.06584	9.04092	8.04324	7.92102	7.89817	8.07445	9.02218	8.91945	9.36244	7.5962	7.34442	7.68519	7.91191	6.85935	8.37581	7.6001	7.19539	6.98136	8.44518	8.55258	8.24452	8.45787	8.27804	8.50249	8.22903	8.05464	8.46741	8.14413	9.0739	8.77003	8.517	7.9883	8.13967	7.97551	8.3618	8.45512	8.04449	8.40457
E11 Pancreatic Progenitor	1441359_at	Zcchc11	9.48841	9.71526	9.8794	9.89746	9.76222	9.25955	9.11789	8.29026	7.98611	8.83191	7.50341	7.45887	8.00638	6.88845	9.87342	9.67019	8.68293	8.67378	9.11264	9.65074	9.51243	7.19444	5.31401	9.38914	10.0811	10.1484	8.94693	9.45069	9.35273	9.26883	8.75749	9.6524	8.77727	7.67831	7.4309	8.17693	9.68283	9.25484	9.0416	8.89501	8.98324	7.73854	7.87513	8.48417	8.6943	8.4557
E11 Pancreatic Progenitor	1419620_at	Pttg1	8.7622	9.19936	8.66032	8.85462	7.9129	7.94775	8.65707	7.99774	8.70653	8.55361	7.95769	7.71018	8.17417	7.87801	6.67579	6.6373	7.44253	7.39108	7.70209	7.83937	8.20164	7.29138	7.3624	8.37012	8.21393	7.85094	6.60596	5.87717	6.21786	6.22257	7.59716	7.33399	7.5483	7.30612	7.28213	7.72437	7.71382	7.60032	6.74511	6.83943	6.64512	7.31642	6.71934	6.48261	5.99372	7.26499
E11 Pancreatic Progenitor	1416750_at	Sigmar1	10.5105	10.1179	10.3073	10.0475	9.63221	9.767	9.47202	10.336	10.4052	9.94905	8.02529	8.04501	7.68368	7.99775	9.06465	8.99259	9.27536	8.00204	7.78667	7.82237	7.91939	8.75411	8.77018	8.98068	8.39596	8.05333	9.33437	9.47553	9.33632	9.78119	10.0196	9.61913	9.8165	9.44104	9.4523	9.15162	8.9678	8.32438	9.08335	9.37041	9.4047	9.60329	9.44023	9.41124	9.39153	9.33867
E11 Pancreatic Progenitor	1434981_at	E130303B06Rik	9.14211	9.11034	8.71537	8.98014	8.58132	8.47189	8.86268	8.05229	7.98775	7.92791	7.28744	7.49291	7.37725	7.29073	7.75866	7.76975	8.17338	6.66226	6.91228	6.94874	6.08825	8.02245	7.58534	7.16969	7.2725	7.33889	7.46504	7.91058	7.49308	7.68187	8.02838	7.92791	7.98856	7.73567	7.73507	7.78119	8.51833	7.57176	7.69269	7.39772	7.45383	7.7774	7.15716	7.22581	7.39736	7.13668
E11 Pancreatic Progenitor	1459794_at	Bcl2l11	8.12634	7.75373	7.65138	7.80511	6.21847	6.01258	5.91405	5.19268	5.14087	5.85421	9.08637	8.01687	7.96368	7.42126	6.87748	6.71843	6.88401	5.15081	6.44135	5.76399	6.8751	5.14261	6.63705	7.80616	7.54823	6.96386	6.53773	6.931	6.99092	6.90541	6.6625	7.85486	6.71171	5.40465	5.50434	6.23679	5.91041	7.60243	7.2537	7.51451	7.32875	7.15353	7.54912	6.56229	6.95288	7.56573
E11 Pancreatic Progenitor	1448901_at	Cpxm1	8.80505	8.58294	8.12233	8.7414	6.62417	6.52357	6.59994	5.9959	6.12132	6.24056	6.16737	5.45968	6.27031	6.08252	5.8898	6.19602	6.26683	7.18796	7.04471	6.72013	7.14751	6.18766	5.86527	6.36175	5.49696	5.66332	7.41503	6.13956	6.47844	7.07717	9.30494	7.79991	8.22922	8.35338	7.72084	8.0781	7.37221	6.11383	5.76971	6.34797	6.00407	5.94391	6.05417	5.21629	5.73008	5.75019
E11 Pancreatic Progenitor	1439652_at	Tnrc6c	9.17327	8.59849	8.92355	8.99646	6.90431	7.2517	6.30005	6.42701	6.9061	7.65279	8.09846	7.65314	7.56734	7.27599	7.73657	7.10986	7.49762	6.04201	7.07638	7.69942	7.6823	6.31078	6.18925	9.71551	9.47612	9.19992	7.48536	8.74629	8.65037	8.20882	7.42284	8.21934	8.30908	6.52119	6.41321	6.94345	6.83085	8.28825	8.08608	8.76445	8.82528	7.51835	7.09621	7.76664	7.433	7.90624
E11 Pancreatic Progenitor	1448454_at	Sfrs6	11.3118	11.5912	11.8009	11.8499	11.37	11.2837	11.6509	11.4953	11.1519	11.8065	9.8817	10.1805	10.0399	9.5879	11.2333	11.2676	11.3206	9.5563	9.54365	9.85579	9.56724	8.98809	9.11597	9.2845	9.4991	9.69868	11.4158	11.0232	11.0959	11.1208	11.2506	11.3804	11.3399	10.0457	10.9289	11.0163	9.35353	11.2303	11.0983	9.51365	8.852	8.75395	8.94403	9.24265	9.04932	9.24001
E11 Pancreatic Progenitor	1436257_at	Ss18	10.017	9.63433	9.68255	9.56748	9.48412	9.2002	8.44329	8.4963	9.05054	9.38869	9.12182	9.02344	9.29513	8.92719	9.70564	9.3553	8.62644	8.66174	8.57883	8.33772	9.22153	6.85682	5.29403	8.75614	9.02339	8.79214	8.21475	9.37857	9.24555	8.63766	9.11464	8.77912	8.62747	8.3823	8.04087	8.19957	8.66396	9.35238	8.54062	8.33646	8.36664	8.08303	8.28311	8.71467	8.33977	7.99754
E11 Pancreatic Progenitor	1424570_at	Ddx46	9.38843	9.25481	9.61038	9.64152	8.9216	8.93061	9.26606	9.21521	9.27679	9.68395	8.21866	8.09582	8.14276	7.69986	8.98955	8.77643	8.72396	8.37906	7.91029	8.11482	8.66683	7.46086	6.07103	7.44421	7.45458	8.70451	8.81241	8.59647	9.0858	8.70678	8.20716	8.85777	8.76502	8.29831	8.60016	8.68071	8.72148	9.58189	9.00875	8.49655	8.61633	8.07808	7.91744	8.62715	8.17926	7.59946
E11 Pancreatic Progenitor	1442499_at	Cdv3	9.33718	9.67818	9.67313	9.92229	9.19599	8.87445	8.73041	8.01366	8.01565	8.8932	9.48942	9.41658	9.2708	8.81412	8.37187	7.96694	8.36779	7.78937	8.04576	8.61536	8.44726	6.34529	6.93737	7.90887	8.81286	9.33177	8.40742	8.66048	8.32809	8.14299	8.46109	9.38543	8.6903	6.70819	7.53614	8.0997	9.64422	9.25986	8.82382	8.01558	7.70482	6.73118	7.77452	7.54309	7.18952	7.47983
E11 Pancreatic Progenitor	1437637_at	Phtf2	8.75277	9.20385	9.23393	9.22311	8.7925	8.67347	8.29691	7.81997	8.25016	8.19164	8.5764	7.93073	8.10285	7.51094	7.86139	7.82949	7.70937	7.77302	7.63238	7.97585	8.23687	7.95559	7.37089	6.39159	5.96006	6.95027	7.62766	7.65765	8.29516	7.56273	7.33522	8.64564	7.85765	6.6192	7.18457	7.15814	8.46877	8.03247	7.54946	7.15107	6.53322	6.88368	7.0669	6.90746	6.82731	6.8347
E11 Pancreatic Progenitor	1422816_a_at	Mutyh	8.25964	7.84945	7.96159	8.14109	7.84064	7.72546	8.30928	7.88138	8.01754	7.53156	6.28843	6.74419	6.91421	6.83419	6.77164	6.93577	6.95797	6.52767	6.60864	6.15407	6.26678	7.5621	7.26718	6.89152	6.97654	6.48052	6.69685	6.44575	7.03226	6.88981	7.31351	6.95517	7.51299	6.87565	7.05367	6.90507	7.97268	6.27347	6.46148	6.63415	6.52723	6.71741	6.65716	6.22257	6.51155	6.30142
E11 Pancreatic Progenitor	1424021_at	Arl6ip6	7.58839	7.92475	8.06571	7.929	6.91186	7.05081	8.18865	7.58776	7.15799	7.83514	7.31341	6.83489	6.53568	5.10993	7.28882	7.23758	7.54018	6.90999	7.02314	7.49285	7.24761	6.49896	6.2252	6.20483	5.24219	6.99018	7.54603	7.25595	7.28884	6.93006	6.9951	7.16339	7.28377	6.42633	6.94117	7.08717	6.81488	6.93534	7.39351	5.58695	6.05509	5.79173	5.41323	5.70388	5.68932	6.09229
E11 Pancreatic Progenitor	1442471_at	Ephb2	7.80082	7.9392	8.07698	7.56987	6.92808	6.98657	6.77435	7.44054	7.25944	7.91459	5.73273	5.37297	5.6955	5.63539	7.59612	7.74901	7.42439	6.32802	6.93788	6.66935	6.72763	7.32551	7.08807	7.44563	7.34281	7.30021	6.91767	7.27059	7.23075	7.60566	7.67756	6.93867	6.89827	6.93756	6.13407	6.55592	6.33949	5.30321	6.14256	6.11632	6.18177	6.48726	5.81675	5.60595	5.19575	5.30395
E11 Pancreatic Progenitor	1415926_at	Nup62	11.7835	11.768	11.4112	11.606	11.281	11.2779	11.3711	10.9988	11.3433	10.9949	11.4399	11.2012	11.551	11.4836	10.5147	10.45	10.6933	10.8586	10.5736	10.7943	10.774	9.53709	9.84598	9.79492	9.99071	9.29224	10.3485	10.4889	10.3295	10.3049	10.3902	10.3073	10.1811	10.4102	10.4059	10.4113	10.1153	10.439	10.1323	10.6621	10.87	10.8076	10.7965	10.6784	10.5421	10.6071
E11 Pancreatic Progenitor	1420916_at	Prpf40a	7.75735	8.17243	8.32108	8.30404	7.7902	7.6919	8.59428	8.20325	7.73977	8.6063	6.27097	6.63435	6.46383	6.5463	7.29506	7.46307	7.81838	6.21065	6.78395	6.51454	6.02269	5.61088	6.10593	5.43877	5.66823	4.74516	8.17245	7.29802	7.814	7.61398	6.40551	6.99316	6.87626	6.44301	7.33011	7.40367	7.89088	7.19036	7.03957	5.58824	5.49342	6.20619	5.6045	5.37552	5.87818	5.16488
E11 Pancreatic Progenitor	1416443_a_at	Sae1	11.8038	11.8305	12.1268	12.0729	11.8042	11.7124	11.9835	11.554	11.7092	11.6877	10.1749	10.5368	10.2214	10.3417	10.6362	10.9187	10.8884	10.6572	10.4055	10.6944	10.7142	10.5494	10.644	10.5717	10.556	10.3274	10.8759	10.4454	10.6601	10.9507	10.806	11.0274	11.0222	10.8925	11.0031	11.032	11.5324	10.6587	10.8191	10.7515	10.7046	10.8324	10.6667	10.9836	10.7698	10.7923
E11 Pancreatic Progenitor	1438496_a_at	Ddx26b	9.18915	9.3524	9.66729	9.55006	8.54316	8.39582	8.28695	6.67979	7.41652	7.89233	6.91752	7.48977	7.42454	6.62842	9.11669	8.83859	8.75473	8.36215	8.52371	8.43354	8.56792	7.38654	6.61177	8.90822	9.10002	8.6717	8.88981	9.04381	8.78559	9.33218	8.5747	8.99385	9.31682	8.71067	8.69658	8.67446	8.8761	8.66943	8.56192	8.0585	8.22411	7.91562	7.95016	8.04245	8.08804	7.92792
E11 Pancreatic Progenitor	1453100_at	Csnk2a2	8.2128	8.66403	8.24868	8.48988	8.40829	8.48986	7.78043	7.68356	7.93447	8.17465	7.15302	7.33559	7.16814	6.84456	8.21584	8.2493	8.68137	7.49831	7.49269	7.55632	7.0817	5.25212	6.82863	5.20204	7.20309	6.3325	8.25403	8.32457	8.646	8.40335	7.19189	8.24803	8.1437	6.56576	7.26894	7.19109	7.43844	8.25659	7.97756	5.88523	5.79091	6.19043	5.96954	6.30871	6.17919	6.56419
E11 Pancreatic Progenitor	1421914_s_at	Mrpl19	11.0469	10.9372	10.7044	10.6839	10.5023	10.6536	10.4607	10.5663	10.901	10.4178	8.79223	8.99144	9.00631	9.03267	9.93299	9.91641	10.1654	9.19643	9.48303	9.10235	9.0665	9.48154	10.0667	9.80371	9.75108	9.99439	9.66842	9.92641	9.9113	9.83283	9.76794	9.35715	9.45827	9.69042	9.56738	9.53221	9.65181	9.39902	9.738	9.44952	9.5782	9.92344	9.67694	9.48068	9.31183	9.64903
E11 Pancreatic Progenitor	1431746_a_at	Uba3	9.09624	9.31809	9.45333	9.59991	8.63832	8.48216	9.0691	8.54514	8.93545	9.01327	8.45365	8.38203	8.27309	7.68004	8.62258	8.56801	9.07853	7.59351	7.45645	7.63882	7.48331	7.18442	7.86606	7.83275	7.27746	7.13677	8.60266	8.19516	8.62059	8.69662	8.19572	8.21858	8.19472	7.87848	8.19611	7.94943	8.56536	8.24011	8.79748	7.18366	7.378	7.40185	7.03498	7.6314	7.14445	7.35298
E11 Pancreatic Progenitor	1451046_at	Zfpm1	9.13715	9.0286	8.67925	8.96365	8.92681	8.99528	8.75399	10.0434	9.70236	9.25618	7.37165	7.77904	7.38038	7.47685	9.28904	9.55087	10.0584	7.60215	8.20688	7.97954	7.67949	7.94183	6.98494	6.83019	6.48243	6.50988	7.97407	8.58357	8.39704	8.55586	7.57608	8.1261	7.97069	8.12889	8.11991	8.02754	7.72104	6.29195	6.59519	6.97519	7.20997	7.66767	7.43023	7.04424	7.1381	7.00523
E11 Pancreatic Progenitor	1452658_at	Krr1	8.9957	8.90443	9.24819	9.30402	9.17885	9.13944	8.85554	8.68237	8.85356	9.12581	8.26231	7.68501	8.45408	7.39297	8.69073	8.24121	8.2399	6.65192	7.03855	7.20448	7.1531	7.56495	8.25862	7.19309	6.99932	7.08214	8.27519	8.1196	8.34384	8.11233	9.44318	8.04896	8.15969	7.57959	8.01534	7.68782	9.44191	8.50462	8.5557	8.35153	7.81836	8.35051	8.1875	8.13101	7.53016	7.52423
E11 Pancreatic Progenitor	1423159_at	Dld	10.3259	10.3666	10.7326	10.5866	9.83691	10.0303	9.96828	10.0857	10.3733	10.4009	9.51905	9.51563	9.43782	8.95805	9.69138	9.93239	10.1216	9.19864	9.23289	9.61129	9.51996	8.7902	7.28098	8.99939	8.57515	8.65841	9.87724	9.97285	9.81481	10.0484	9.57442	10.0215	9.85331	9.43172	9.78598	9.66434	10.5955	9.98755	10.0286	9.34603	8.96588	8.4369	8.4369	9.20956	8.82143	8.62755
E11 Pancreatic Progenitor	1448413_at	2410016O06Rik	10.5336	10.2999	10.0157	10.2277	9.68056	9.96017	9.53723	9.8056	10.2326	9.85608	9.58654	9.39911	9.43468	9.20442	8.76916	8.60698	8.96793	9.52823	9.52866	9.70146	9.25744	9.913	9.72331	8.9153	8.45842	8.30236	8.45671	8.71919	8.63398	8.71007	9.19091	9.02868	8.8765	8.85266	8.53939	8.23907	6.51771	8.10429	8.80157	8.9077	9.19673	9.08966	9.12186	9.15417	8.79105	8.8252
E11 Pancreatic Progenitor	1430889_a_at	Tpmt	9.91694	9.56515	9.44544	9.2393	8.73752	8.67357	8.99663	8.01991	8.44295	7.84912	8.55442	8.5664	8.81995	8.41568	8.46535	8.37003	8.98701	8.77638	8.4307	8.88738	8.54615	7.30748	5.91163	7.28461	7.13738	7.07908	7.67169	8.14176	7.49952	7.49691	7.46001	7.86182	7.98067	7.37916	7.75289	7.83879	7.7948	7.47559	7.33011	7.20422	7.18075	6.04373	7.3216	7.2291	7.67941	5.71707
E11 Pancreatic Progenitor	1426896_at	Zfp191	9.22968	8.9989	9.4767	9.06753	8.9511	8.63373	8.53492	8.77236	8.78346	9.14931	7.93621	8.23222	7.33256	7.58904	8.96394	8.87806	8.50855	8.28018	8.10329	8.16175	8.19444	7.06897	7.12618	8.36434	8.30528	9.01438	7.85886	9.13609	8.77695	8.48198	7.35118	8.76925	8.2235	6.92043	7.81603	7.92587	7.96431	7.66219	8.4465	7.70785	6.9212	7.1007	6.62433	7.26837	7.18359	7.29128
E11 Pancreatic Progenitor	1449299_at	Lrp5	8.60656	8.71621	8.84546	9.1189	8.7822	8.6969	9.19394	8.33008	8.24064	7.86115	8.55047	8.56106	8.44213	8.53536	8.45819	8.49037	8.96875	7.05253	6.45368	6.92283	7.07741	6.87816	6.07223	5.57166	6.04169	5.76425	7.51086	7.91193	7.81088	8.06456	7.59406	7.94899	8.06284	8.28339	8.38117	8.08132	8.41636	7.00534	7.22026	7.59259	7.99725	8.04036	7.79594	7.48569	7.03224	6.70705
E11 Pancreatic Progenitor	1420936_s_at	Cpsf2	9.05046	9.42184	9.39526	9.39891	9.00156	9.08045	9.30993	8.82205	9.26385	9.13632	8.32266	8.63354	8.21293	8.19325	8.71196	8.55089	8.80326	8.399	8.23708	8.19188	8.26434	7.66302	7.12593	7.058	7.19612	7.62142	8.61709	8.03047	8.21411	8.5127	8.30836	8.22694	7.57074	8.33273	8.41079	8.15922	9.19682	8.12473	8.11258	7.93769	8.07007	8.46624	8.2979	8.17315	8.05868	8.18674
E11 Pancreatic Progenitor	1428127_at	ENSMUSG00000074747	11.6265	11.1311	11.2618	11.2906	10.91	10.9508	10.5348	10.0053	10.1474	10.0916	9.48742	9.65503	9.96337	9.65177	11.1066	11.1086	11.6074	8.82545	9.06703	8.85971	8.80859	8.53885	8.11273	9.0236	8.96488	8.83047	10.8518	11.1285	11.0341	11.1106	10.878	10.8238	10.808	10.8007	10.9497	10.8572	11.6607	10.6614	10.7759	10.667	10.9502	10.6391	10.5627	10.677	10.5413	10.7122
E11 Pancreatic Progenitor	1418630_at	Khdrbs1	8.62044	8.21155	8.52026	8.69396	7.81164	7.47947	7.51378	7.29041	7.20353	8.11838	7.69288	7.05458	7.33246	6.50357	8.14119	8.29265	7.54148	6.8574	7.11838	7.3605	7.86283	5.42903	6.74985	7.68147	7.33068	7.07226	7.64944	7.93411	7.64589	7.85588	7.24173	7.60534	7.71212	7.08567	7.06803	7.31978	7.22039	6.98984	6.88845	6.55551	6.49202	6.29569	6.08741	6.79209	6.62615	7.02142
E11 Pancreatic Progenitor	1456117_at	Rrp1b	11.1661	11.7204	11.4866	11.5824	10.8632	10.9657	10.555	10.7988	10.7875	10.4858	8.86617	8.74193	8.95091	8.90766	9.71402	9.89328	9.85336	10.3347	10.1406	10.2092	10.2764	9.56734	9.37385	9.64913	10.0875	10.3536	10.2319	10.0629	10.2101	10.0348	10.2756	10.0279	9.94502	9.21624	9.70589	9.47037	9.69392	9.61341	9.79019	9.47916	9.31861	9.27798	9.23864	9.67933	9.5436	9.24253
E11 Pancreatic Progenitor	1438817_at	Dna2	8.15308	7.75268	7.69256	7.79537	8.06523	7.98249	7.61321	7.26491	7.67897	7.85526	5.39218	5.12706	5.63778	5.70015	6.9428	6.67141	6.5713	7.09537	7.00292	7.0752	7.01488	5.96783	7.00484	6.41157	6.31	6.60479	6.39333	6.96938	7.0185	6.68939	6.55831	6.88137	6.51676	6.48439	5.97757	6.3803	7.59973	6.73688	6.43754	6.5885	6.44478	6.5358	6.62569	6.48156	6.61004	6.65984
E11 Pancreatic Progenitor	1441105_at	Gm11110	8.21664	8.18752	8.05063	8.46273	7.63835	7.56652	7.78888	7.42015	7.54716	6.98452	6.75991	6.86951	6.64982	6.34662	7.19332	7.177	7.66059	6.76963	7.2486	6.51725	6.62558	7.48169	8.58899	7.7619	7.55782	7.21359	7.21552	7.22685	7.54438	7.31058	7.0359	7.83345	7.94346	6.95535	6.8729	7.01693	8.34829	6.70707	7.63835	7.11647	6.80771	6.81097	6.89908	7.00263	6.93049	6.68794
E11 Pancreatic Progenitor	1418351_a_at	Dnmt3b	8.84297	8.64096	8.37215	8.40555	8.17011	8.08957	8.4639	8.21119	8.97794	8.22559	6.82998	6.40577	5.62654	5.63929	7.32196	7.01239	7.29881	7.43838	6.23723	6.88441	7.38188	5.66093	6.513	6.15472	6.83975	5.97149	7.58534	7.9282	7.69592	7.7949	7.68154	7.06322	7.04331	8.90596	8.15008	7.79521	7.2863	7.62808	7.6132	8.2288	9.10394	9.36274	7.92749	7.8801	7.90035	8.04804
E11 Pancreatic Progenitor	1446140_at	Pcm1	9.73766	9.39596	9.84097	9.85938	8.82361	8.32308	8.44576	7.63796	7.62472	8.02643	8.83263	8.4978	8.86106	8.22799	9.43361	9.24426	8.40617	8.45559	8.17322	9.30292	9.28902	7.09349	7.38785	8.79764	8.97231	9.00142	7.98179	8.5238	9.02953	8.60492	8.77696	9.10868	9.12015	7.73565	7.2097	7.90847	10.587	9.9831	9.7645	9.3129	8.89856	8.34433	7.74469	8.36771	8.48649	8.60919
E11 Pancreatic Progenitor	1425195_a_at	Tcp1	11.4503	11.7248	11.6001	11.8279	11.3831	11.3295	11.2426	11.1057	11.2824	11.109	9.97838	10.0537	10.2662	10.3057	10.7013	10.8715	10.8284	10.4648	10.476	10.3601	10.27	10.7357	10.4539	10.1456	10.2491	9.97065	10.8376	10.5355	10.4468	10.7507	10.6331	10.5847	10.5171	10.378	10.4587	10.3599	10.6886	10.2889	10.4004	10.1382	10.2016	10.3783	10.2719	10.021	10.1084	10.0238
E11 Pancreatic Progenitor	1429883_at	Actl6a	9.21489	9.01937	8.82923	8.89046	8.09053	7.87893	8.32414	8.12343	8.29881	8.03726	8.0903	7.61408	7.57236	7.6564	8.53071	8.3219	8.36414	7.33255	7.86424	7.88355	7.6751	6.11903	7.76153	7.89627	7.84405	7.54889	8.06474	8.19512	8.0561	8.0278	8.11906	8.14668	7.59295	8.52169	8.06858	7.89109	8.64727	7.34683	7.60355	7.95688	7.96481	8.25798	7.41316	7.45144	7.79819	7.62976
E11 Pancreatic Progenitor	1415925_a_at	Nup62	11.8534	11.8212	11.4726	11.5997	11.1896	11.3058	11.4463	11.1874	11.4734	11.1953	11.4273	11.1678	11.544	11.4646	10.4175	10.5408	10.7626	10.727	10.5769	10.6712	10.6474	9.54351	10.2334	9.97511	10.1667	9.39473	10.2616	10.5455	10.3206	10.2392	10.5884	10.2876	10.3141	10.587	10.5393	10.4407	10.0498	10.2887	10.1111	10.5472	10.7033	10.8494	10.7071	10.5803	10.4101	10.5744
E11 Pancreatic Progenitor	1450847_at	Ncbp2	10.9154	10.8738	11.153	11.3101	10.8283	10.6884	10.6779	10.7632	10.8203	11.0422	9.47	9.50482	9.211	9.24878	10.1609	10.1484	10.3635	9.54414	9.29989	9.03052	9.10377	10.5684	8.71817	8.96813	8.72119	8.68337	10.391	10.4217	10.2982	10.5975	10.0212	10.5724	10.3812	10.067	10.2008	10.1953	10.9138	10.681	10.6188	9.68815	9.87385	10.0721	9.622	9.84334	9.78894	10.0988
E11 Pancreatic Progenitor	1435535_at	Depdc5	9.55342	9.42983	9.23403	9.64892	8.86011	8.82745	9.12262	8.92385	9.02937	8.73102	7.79662	8.0457	7.7635	8.26948	8.48564	8.79067	8.99771	7.6889	7.73867	7.63095	7.80647	8.1565	8.43309	8.24726	7.9375	7.20895	8.56075	8.71528	8.46246	8.66744	8.50128	8.69714	8.57373	8.40801	8.38504	8.16902	9.74503	8.14444	8.47926	8.57221	8.60846	9.03447	8.73239	8.17592	8.30001	8.15649
E11 Pancreatic Progenitor	1439136_at	Ssbp3	10.1275	9.83667	9.74113	9.64156	8.33365	8.15225	8.27554	7.26149	7.91911	7.83428	7.85768	8.24968	7.99669	7.87082	9.76708	9.64571	9.34879	8.63247	9.37444	8.96651	8.95469	8.23723	8.53106	8.90034	9.10927	8.6808	8.38691	8.52379	8.90508	8.78847	9.45534	8.94228	9.05434	8.00854	7.70171	8.16874	8.6801	8.83723	8.44741	9.35453	9.58929	9.29052	8.80731	8.75543	8.80892	9.38223
E11 Pancreatic Progenitor	1423624_at	Vrk2	10.6673	10.8495	11.0407	11.0363	10.5275	10.5683	10.6646	10.0254	10.6456	10.5599	9.3585	9.86659	9.44438	9.57459	9.64178	9.65455	10.1601	9.6175	9.64001	9.35491	9.23487	9.3347	9.82503	9.35177	9.63636	9.30972	9.87867	9.74869	9.70225	9.85568	9.64685	9.58104	9.82009	9.62714	9.83069	9.69355	10.5658	10.1167	9.93496	9.18886	9.42297	9.60189	9.1313	9.56216	9.37902	9.01695
E11 Pancreatic Progenitor	1445315_at	Wnk2	8.19482	7.89139	7.94601	7.66076	7.27185	7.34638	7.38487	6.09074	5.35943	6.76102	7.03806	6.78162	7.78862	7.71081	6.87999	6.64483	6.67749	6.70677	6.31169	6.98945	6.2707	6.84168	7.0406	7.60973	8.19338	7.82136	6.27784	7.07237	7.42521	7.09085	6.57412	6.51599	7.26275	5.40878	5.56187	5.9163	10.7061	6.49192	6.67767	6.24961	6.92754	6.5679	6.88543	6.53143	6.40252	6.49604
E11 Pancreatic Progenitor	1429165_at	3110001I22Rik	7.36585	7.5049	7.70342	7.84059	7.33915	7.0286	7.4189	7.34019	7.90951	7.68104	6.89983	7.29043	7.90498	7.28199	7.14582	6.80729	7.1105	5.87383	6.93535	6.6079	5.58608	5.1184	5.868	6.68623	6.39983	6.22154	6.76885	6.58132	6.01527	6.47984	6.12927	6.89008	5.71337	6.66237	6.87503	6.76619	8.03186	6.90983	6.40909	6.12769	5.73978	4.88142	6.48463	5.45064	5.63821	5.389
E11 Pancreatic Progenitor	1460713_at	BC048355	7.99436	8.48803	8.5503	8.49412	8.51143	7.90358	8.15437	8.89854	9.17297	9.71731	6.42922	6.40283	5.89086	6.27925	6.88141	6.65017	6.97403	6.94474	7.45314	7.45946	8.49104	6.96779	6.02976	7.23355	7.16004	7.02588	7.73272	6.29305	6.51023	6.27299	5.95403	6.63634	6.98782	6.61647	7.18575	7.63908	7.87518	6.96652	6.87084	7.03267	6.90855	6.70815	5.86366	6.53423	6.58448	6.37916
E11 Pancreatic Progenitor	1434243_s_at	Tomm70a	8.06313	8.59504	8.63221	8.43588	7.66017	7.70301	8.00161	8.52909	8.07845	9.15847	5.88188	5.18485	5.78332	5.81865	7.23349	7.2726	7.63366	7.45658	7.74818	7.4937	7.17613	6.08084	6.27204	6.67286	6.64822	6.90912	8.26069	7.75281	7.75935	7.99722	7.3103	7.39546	7.46683	6.99004	7.82009	7.47508	7.78718	7.3243	7.51276	6.0558	6.8314	5.53923	5.91687	6.35185	6.82891	6.82979
E11 Pancreatic Progenitor	1450116_at	Fam48a	7.97755	7.92416	8.14033	8.37894	7.50354	7.69277	7.69073	7.12046	7.29095	7.52436	6.82297	6.84444	6.46148	6.58461	7.35121	7.03562	7.46424	6.81296	6.94023	7.23378	6.76757	5.93858	5.74859	6.65448	6.53498	6.85828	7.82659	7.51704	7.51231	7.74937	6.65574	7.19894	7.43808	6.18171	6.8146	7.06796	6.40187	7.22655	7.42043	6.46434	6.84673	6.59533	6.03694	6.61156	5.96811	6.23918
E11 Pancreatic Progenitor	1443128_at	Ints6	8.22395	7.8632	8.38233	8.33008	7.14156	6.89428	7.04371	6.51949	7.02738	7.07404	7.22877	8.27194	7.96354	7.18945	8.03445	7.59889	6.87472	6.53139	7.49518	7.88632	7.27421	4.69384	4.93737	7.24202	7.39147	7.00532	6.91714	7.47833	7.88729	7.34659	6.86108	7.97456	7.47898	7.32077	6.31504	6.98325	5.0581	8.11601	7.78953	7.13893	7.06476	6.73534	6.87558	6.62094	6.85749	5.8798
E11 Pancreatic Progenitor	1417340_at	Glrx3	12.4708	12.6051	12.872	12.9779	12.4746	12.3849	12.3048	12.3545	12.4226	12.4956	10.7558	11.0528	10.8328	10.915	12.3912	12.3789	12.663	11.4872	11.7624	11.5168	11.3049	11.6358	11.5812	10.9289	10.6837	10.7168	12.3174	11.9896	11.9935	12.2013	11.8169	12.1256	11.95	11.4742	11.9249	11.9871	11.9517	11.9613	11.9281	10.5782	10.408	10.4783	10.4821	10.423	10.2385	10.1187
E11 Pancreatic Progenitor	1435651_a_at	Smarcad1	8.93433	8.73291	9.1557	9.19527	8.20225	8.02094	8.29942	8.02913	8.42313	8.24636	7.38466	7.70489	7.66019	7.25439	8.41147	8.45237	8.92663	7.58595	7.46466	7.89126	7.68962	6.05376	7.95818	6.76273	6.65415	6.72479	7.83878	8.13997	8.18695	8.09715	7.88992	7.75624	7.81141	8.09901	8.37885	7.60092	8.92098	7.65106	7.75148	7.81794	7.94884	8.02312	7.41774	7.57281	7.59094	6.93629
E11 Pancreatic Progenitor	1423826_at	Noc4l	11.025	10.8064	10.5814	10.6057	10.2896	10.3979	10.3092	10.445	10.5737	10.3945	9.56365	9.71254	9.87538	10.1228	9.32152	9.51538	9.58136	9.36235	9.508	9.23971	9.26653	8.78989	8.94763	9.20306	8.68621	8.77164	8.97174	9.51176	9.3378	9.47683	10.144	9.36261	9.07537	9.21439	9.27643	9.0495	10.0858	9.16687	8.92576	9.1752	9.26782	9.78753	9.23867	9.26512	9.11601	9.05177
E11 Pancreatic Progenitor	1421191_s_at	Gopc	8.89085	9.3552	9.49965	9.48482	8.48562	8.26745	9.21072	8.23966	8.15974	8.7723	6.36503	7.27472	6.54689	6.26513	8.47663	8.7254	8.51913	7.86667	7.79482	8.09182	8.13454	6.90221	5.86316	7.44887	7.51106	7.54471	9.1294	9.0571	9.32766	8.93866	7.87832	8.52623	8.71164	7.73344	8.20838	8.43178	6.51575	8.89068	9.07721	7.18948	7.08592	7.1322	7.16939	7.27881	6.48707	7.67949
E11 Pancreatic Progenitor	1424643_at	Tcof1	11.0897	10.9579	10.6679	10.9086	10.6601	10.8184	10.7058	9.9451	10.5185	10.4066	9.94263	9.71056	10.094	10.0479	9.37071	9.34035	9.57243	10.1085	10.2071	10.0877	9.90373	9.93934	9.83316	9.66488	9.89405	9.81302	9.33342	9.40184	9.90175	9.344	9.8926	9.73379	10.0551	9.55673	9.65031	9.61719	10.4623	10.0112	9.37112	9.19294	9.20234	9.60238	9.52084	9.24142	9.52949	9.42843
E11 Pancreatic Progenitor	1431074_a_at	Pitpnc1	8.01158	8.5999	8.22637	8.37303	7.71911	7.63171	7.37862	7.98909	7.48518	8.33627	7.08355	6.2815	6.1595	5.82255	7.40618	6.89031	7.99479	6.97548	6.91436	6.4764	6.09458	6.02561	7.19112	6.71292	6.52514	7.11534	7.2274	7.72128	7.44133	7.51914	7.60387	7.28605	7.12264	6.42798	6.86415	6.93166	6.97207	7.36674	6.93588	6.29039	6.17106	5.72135	6.17111	6.57781	6.1621	5.95183
E11 Pancreatic Progenitor	1417728_at	Mbd3	11.4216	11.1486	10.922	11.0797	10.6548	10.5845	10.4845	10.5997	10.6797	10.3018	9.18481	9.46918	9.48432	9.66926	10.0019	10.1617	10.3677	9.03375	8.89373	8.8119	9.02048	9.31672	9.53263	10.0778	9.40921	9.31113	9.88133	10.233	9.75301	10.2029	10.2804	10.2482	10.2317	10.1243	9.98716	9.95701	10.5992	9.34702	9.56408	9.93917	10.0721	10.3948	10.0242	9.84052	10.219	9.96923
E11 Pancreatic Progenitor	1435922_at	Fbxl19	9.87911	9.77429	9.41524	9.56951	8.92621	9.01837	8.87932	8.14031	8.20328	7.94512	7.94556	7.74099	7.6647	7.74729	8.94567	8.80244	9.1117	8.23243	8.43229	7.9698	8.64458	8.55083	7.43943	8.20171	7.92182	7.69149	8.79698	8.32282	8.32849	8.67723	8.53135	8.44901	8.23184	7.84048	7.67582	7.82694	8.92803	7.80217	7.92522	7.99861	8.13703	8.20955	8.00094	8.02833	8.18635	7.78663
E11 Pancreatic Progenitor	1424081_at	Pcgf6	9.77945	9.98179	10.2366	10.3177	9.31558	9.23541	9.66802	9.86247	9.94332	10.0026	7.85117	7.77377	7.74801	7.00513	9.78579	9.86433	9.5511	8.96041	9.65807	9.90779	9.32608	8.67348	7.88424	8.83817	8.96177	9.36811	10.0862	9.68745	9.68582	10.0617	9.05171	9.53272	9.19637	9.16191	9.26582	9.15478	6.78132	8.72533	9.04793	8.5371	8.39316	8.44963	7.7059	8.10569	7.65166	7.64379
E11 Pancreatic Progenitor	1450400_at	Tgs1	7.88807	7.43952	7.84882	7.62277	6.94125	7.42819	7.82385	6.76012	7.05058	7.53265	6.50787	6.89107	6.13755	5.92198	6.99351	7.16437	6.73186	6.28115	6.17998	5.52911	6.20358	5.75306	5.50087	6.22635	6.17494	5.7489	7.00219	7.48476	7.13625	7.43362	6.80834	5.76746	6.09654	6.82541	6.91572	6.8985	5.96706	6.49162	6.45155	6.95992	6.67715	6.76012	6.7228	6.6709	6.22773	5.91706
E11 Pancreatic Progenitor	1453344_at	1810032O08Rik	9.49654	9.81615	9.32936	9.61319	8.96758	9.3146	9.02506	9.67734	9.77764	9.14744	8.81311	8.76295	9.60542	9.45159	8.33769	8.53362	8.99282	7.79919	8.24707	7.72252	7.4664	8.48138	8.89745	8.62359	8.46635	8.24521	8.20008	8.03281	7.93974	8.27577	8.76014	8.63289	8.65945	8.66802	8.79915	8.54068	9.34839	8.36596	8.24285	8.02779	8.3656	8.15302	7.73352	7.81161	7.66967	7.38095
E11 Pancreatic Progenitor	1441178_at	Dtwd2	7.90871	7.92504	8.28319	8.46754	7.45068	7.62809	8.0922	7.58541	7.4239	8.10465	6.70818	7.16424	6.35857	5.48749	7.02671	7.09601	7.98391	6.78452	6.6735	6.77308	7.50521	6.83762	5.23167	7.05502	7.65254	5.50843	7.35519	7.16118	7.61568	7.38909	6.68985	6.91754	7.14511	6.06809	7.51021	7.05083	7.23505	7.10015	6.80596	5.8044	6.00485	5.53529	6.10635	5.81628	5.32501	4.79101
E11 Pancreatic Progenitor	1427052_at	Acacb	9.31847	9.13113	8.7973	8.97896	8.98307	9.26069	8.42591	10.274	10.0076	9.46988	7.75259	8.7414	8.59591	9.16441	7.16727	7.39429	7.83289	9.61551	8.6936	8.82931	9.60127	7.66084	7.60649	7.0736	7.41527	7.17375	6.91375	7.22722	7.06148	7.25112	8.41971	7.18843	8.05728	8.63687	8.20205	8.18836	8.45589	8.35803	7.20032	6.73154	6.60401	6.8259	7.983	7.04351	7.89003	7.3544
E11 Pancreatic Progenitor	1451920_a_at	Rfc1	10.6019	10.187	10.141	10.2389	10.0458	9.92309	10.1661	9.83939	10.0625	10.1843	8.80346	8.94762	8.86358	8.64638	8.92172	8.88453	8.98425	8.27355	8.42901	8.38539	8.52515	7.96473	8.5147	9.07173	8.54933	8.98459	9.00663	9.59968	9.33034	9.06951	9.56717	9.09929	9.36009	9.49229	9.40445	9.71062	10.3912	9.27493	9.19449	9.22648	9.48857	9.30731	9.16703	9.09852	9.13763	8.81009
E11 Pancreatic Progenitor	1437635_at	Dcbld2	10.4972	10.948	10.7826	10.5513	10.0358	9.8151	10.1135	9.00636	9.48313	9.38565	9.11703	8.40517	9.14751	9.14593	9.9791	9.97971	9.70635	10.2977	10.5182	10.1395	10.5567	9.66017	9.80976	9.94033	9.88016	10.0801	9.58439	9.57623	10.1933	9.93526	10.6173	10.0056	9.80193	9.48872	9.8661	10.335	8.21356	8.75047	9.19024	9.20865	9.31939	9.57727	8.9232	9.109	8.93997	9.02957
E11 Pancreatic Progenitor	1415956_a_at	Cdk16	11.0364	10.905	10.5976	10.6386	9.95618	10.0167	9.79883	10.3041	10.5161	10.0642	8.61004	8.79381	8.77113	8.85459	9.88467	9.83845	9.95776	8.61082	8.51239	8.35164	8.82159	9.81661	9.31269	9.68227	9.36928	9.33286	9.93958	10.4553	10.2298	10.3797	10.528	10.2202	10.461	9.7346	9.40276	9.76523	10.536	9.87482	10.104	10.2387	10.3986	10.743	10.2372	10.1847	10.3311	10.3315
E11 Pancreatic Progenitor	1450902_at	Brd3	10.2115	9.82552	9.82945	9.71972	9.447	9.58016	9.33703	9.09403	9.45214	9.02678	8.42782	8.44953	8.00675	7.87888	9.44279	9.55572	9.61639	8.54647	8.34295	8.12114	8.22324	8.46943	7.1851	8.58712	8.07865	7.97382	9.01755	9.45071	9.38375	9.33338	8.85387	8.8752	8.96283	8.86187	8.7033	8.51078	10.3125	8.42263	8.64257	8.83444	9.11251	9.09777	8.72073	8.53494	8.72364	8.57186
E11 Pancreatic Progenitor	1433831_at	Dcaf17	8.78302	9.02394	9.24075	8.78045	8.70912	8.48769	8.36788	8.54998	8.5164	8.77065	7.37738	7.21353	7.20889	6.41446	8.19631	8.16319	7.89581	8.25432	8.60984	8.64985	8.06104	8.67356	8.29579	9.0533	8.75939	8.57677	7.84921	7.47904	7.98889	7.41116	7.36329	6.80822	7.59167	7.43034	7.30094	7.46537	8.21289	6.48826	6.87322	8.13861	8.66463	7.55758	7.44083	7.88964	8.67816	7.10177
E11 Pancreatic Progenitor	1418633_at	Notch1	9.69861	10.1272	9.63375	9.81022	9.30903	9.18989	9.20719	9.96089	9.56229	10.1517	9.23804	9.06819	8.62408	8.68165	8.00505	7.96488	7.99197	8.8205	8.8654	8.72707	8.40357	8.53942	7.80974	7.96834	8.18059	8.74712	8.89178	8.71228	8.66145	8.81711	9.07792	8.83384	9.22248	8.60229	9.14361	9.12878	8.48534	7.71327	8.0854	8.28931	8.40901	8.47819	7.96855	8.18359	8.36699	7.92778
E11 Pancreatic Progenitor	1425148_a_at	Snx6	10.8053	10.2841	10.5646	10.7169	9.91045	10.0423	9.975	10.2291	10.3905	10.5324	9.56806	9.94616	9.13646	8.78772	9.97712	9.76567	9.99606	9.2075	9.10535	8.93644	9.0677	7.65743	7.50626	8.77746	8.47644	8.31161	10.2387	10.4312	10.4165	10.0685	10.2233	10.1882	10.1499	9.6839	9.77043	9.56112	10.6848	10.0309	10.0213	9.14603	9.39554	9.49314	8.98342	9.13838	8.82532	9.27546
E11 Pancreatic Progenitor	1425561_at	Trnt1	9.30306	9.27824	9.4802	9.66391	8.68879	8.75425	8.5891	8.75024	8.89821	9.30323	8.17699	8.23435	8.53891	8.22121	8.44984	8.23265	8.75382	8.02557	8.21286	8.10352	8.1746	7.62314	7.52394	8.33431	8.03491	7.91159	8.78808	8.65106	8.76524	8.63184	8.27853	8.64996	8.54969	7.95412	8.56427	8.24403	9.45889	8.99131	8.90602	8.16104	8.22471	7.90757	8.09084	8.1785	8.19265	8.00792
E11 Pancreatic Progenitor	1419396_at	Arid3a	8.85969	9.28088	8.91092	9.2386	8.00235	8.12412	7.29251	8.43869	8.24655	8.39307	6.96379	6.70091	6.74486	7.3151	8.38414	8.46125	8.17547	7.88848	7.59588	8.19877	7.76208	8.14903	7.45288	7.61491	7.58498	7.63593	7.92538	8.45671	8.19606	8.20198	7.65229	7.89315	8.15678	7.36807	7.32365	7.29856	8.42057	7.39456	7.33438	7.96124	7.77894	7.83948	7.35464	7.20877	7.51883	7.32943
E11 Pancreatic Progenitor	1460153_at	Abi2	8.51241	7.91833	8.19936	8.16562	6.38246	6.57639	5.95101	6.23387	6.24853	6.721	7.89566	7.16716	6.88006	6.01893	7.54028	6.93218	6.71899	6.914	6.76805	7.18142	7.15474	5.97854	6.14038	7.47511	7.18352	6.9552	6.68147	7.41622	7.35252	7.43536	7.38371	7.52169	8.10497	6.30409	5.72184	6.46434	7.80259	8.43467	8.0685	7.6489	7.61274	6.90832	6.10652	7.0077	6.73572	6.85349
E11 Pancreatic Progenitor	1418662_at	2210012G02Rik	7.94369	8.04366	7.6028	7.673	7.77332	7.67585	7.83932	7.67027	7.79041	7.41437	6.34685	6.65937	6.54064	6.56026	7.44407	7.32933	8.08438	6.10503	6.07714	5.99814	6.23411	6.48876	6.2802	6.22044	5.84383	5.69129	6.92919	7.39544	7.21306	7.23109	6.81317	7.24135	6.81324	7.30216	7.24436	6.91584	7.06794	6.42971	6.40608	5.98238	6.62054	6.98471	6.57908	6.40896	6.15011	6.41548
E11 Pancreatic Progenitor	1419747_at	Asgr2	8.34832	8.39924	8.92472	8.1895	6.63618	6.52485	6.22256	6.94478	7.05222	6.37825	9.12775	7.42633	7.00372	8.62846	6.85763	6.71182	7.07694	6.43775	6.50712	6.85732	6.46045	6.64808	6.46098	6.04363	6.04458	6.17823	8.10492	8.05563	7.33131	7.89676	6.95122	6.60604	5.80315	5.85184	6.08877	6.17693	7.05993	6.03012	5.72611	6.19022	5.5872	6.33454	6.97047	6.57762	7.2016	5.95028
E11 Pancreatic Progenitor	1454378_at	Ywhaq	10.1181	10.3897	10.5482	10.5643	9.82634	9.89955	9.95834	9.56721	9.82503	9.83499	8.80805	9.29025	9.19867	8.78265	9.54958	9.51639	9.68248	8.80504	8.97596	8.99855	9.06743	8.19415	8.01749	8.79588	8.78209	8.83238	9.89097	9.50926	9.74045	9.91004	9.22631	9.77313	9.40951	9.31264	9.45026	9.64494	8.77625	9.72703	10.0499	9.25643	9.14019	8.62987	8.77095	9.29014	9.02309	8.90508
E11 Pancreatic Progenitor	1425288_at	Samd11	10.1555	10.0603	9.82497	9.73715	9.46165	9.57157	9.25505	9.64293	9.90646	9.94269	9.33321	8.83693	8.98785	9.14703	8.56447	8.63813	8.56895	8.25994	8.44304	8.49565	8.53669	8.90438	9.09977	9.00102	8.82641	8.63908	8.527	8.64824	8.88343	8.5817	8.73038	8.92851	8.58584	8.6614	8.5559	8.79339	9.47523	8.53908	8.52383	8.37045	8.55476	8.49706	8.86268	8.13476	8.22907	8.40991
E11 Pancreatic Progenitor	1452422_a_at	Snrpb2	11.9871	12.2398	12.5289	12.4164	12.1948	12.0365	12.3404	12.2748	12.1184	12.2613	10.9654	11.0281	10.8995	10.2551	12.0122	11.9039	11.9405	11.365	11.3232	11.4976	11.208	11.1024	10.2211	10.6084	10.3401	10.5881	11.8284	11.2693	11.4683	11.3829	11.6535	11.8169	11.3699	11.3421	11.9731	11.6565	11.9175	11.5149	11.3472	10.2579	10.0238	9.95539	9.85975	10.4737	10.2188	9.79776
E11 Pancreatic Progenitor	1436574_at	1700029I01Rik	8.79249	9.23637	9.11408	9.3858	8.96534	8.58064	9.35286	7.54434	8.81956	6.78861	6.45543	6.17729	7.2804	7.66928	8.69574	8.67375	8.0998	8.18458	8.08254	7.82019	8.18886	7.70703	10.1977	7.80147	7.80247	7.79739	7.99206	8.26684	8.32213	7.69175	7.53533	7.56209	7.6883	8.32115	7.86259	6.98325	7.69414	8.99272	8.68781	7.89018	8.06233	8.59169	7.78841	8.42817	6.66615	7.29565
E11 Pancreatic Progenitor	1452996_a_at	Aven	9.43822	9.01359	8.87603	8.81575	8.63642	8.80874	7.891	8.3966	8.67535	8.78427	7.9686	8.0349	7.88843	7.78845	7.87161	8.23729	8.75865	6.85887	6.09893	6.43566	6.66029	6.83271	6.1	7.47021	7.45648	7.29655	8.0601	8.7581	8.51294	8.34507	8.38526	7.84011	7.78364	6.97335	7.49345	7.20334	6.25634	7.41247	7.50194	7.33811	7.30187	7.37889	7.34894	7.2617	7.40745	7.45385
E11 Pancreatic Progenitor	1429538_a_at	Sfrs18	9.40928	10.0489	9.8024	10.0449	9.58736	9.28691	10.3402	9.06665	8.15159	9.49879	8.8169	8.81144	8.47285	7.94685	9.32851	9.03823	9.59873	8.38596	7.75489	8.63891	8.6452	7.45149	6.87155	7.30637	7.25452	7.56159	9.5694	8.47132	8.97254	8.5525	9.3519	9.14854	9.44999	7.85154	9.15347	8.80956	8.55119	9.37168	8.72348	7.60182	7.28189	6.90586	7.34124	7.96757	6.97055	7.02633
E11 Pancreatic Progenitor	1418514_at	Mtf2	11.7395	11.4352	11.878	11.9089	11.0167	10.7794	11.008	10.4546	10.9783	11.1281	10.1477	10.149	10.4472	10.0839	11.1743	11.0544	10.8838	10.1991	10.2444	10.4238	10.2835	9.2965	9.67087	9.71092	9.75064	10.1682	10.93	10.8726	10.7456	10.8842	10.5648	10.7409	10.8815	10.6456	10.5861	10.4436	9.75002	10.5618	10.0736	10.5888	10.8936	10.3329	10.0557	10.3884	10.1742	9.92496
E11 Pancreatic Progenitor	1451191_at	Crabp2	8.13323	8.66387	8.2381	8.54603	6.95478	7.12232	6.87367	6.88011	6.83172	6.57557	7.03922	6.73469	7.58472	7.1979	6.85184	7.08691	7.34292	6.26641	6.2684	6.44673	6.31543	6.89892	6.92203	6.60945	6.67905	6.63496	6.72002	6.22677	6.17732	6.32464	6.17672	6.26946	5.86978	6.40402	6.34234	6.52205	7.44651	5.85778	6.05382	6.66243	6.26356	6.20179	6.26268	5.9884	6.49411	6.11768
E11 Pancreatic Progenitor	1421933_at	Cbx5	9.54809	9.09562	8.98683	9.15647	9.33376	8.80471	8.48225	8.96006	9.69842	9.07418	7.76917	8.13713	7.77515	7.08959	8.9964	8.62896	8.12323	8.29885	7.56308	7.56556	7.53024	7.43837	5.19098	7.7413	8.26373	7.90194	7.60136	8.86953	8.47033	7.30569	8.12008	8.36897	8.37022	8.17319	7.61464	7.35977	8.44233	7.94099	8.34145	8.72346	7.14815	8.2044	8.49297	7.81149	8.47557	8.23108
E11 Pancreatic Progenitor	1437242_at	Ttll12	11.3312	11.1852	10.9705	10.9044	10.7343	10.9117	10.5801	10.8193	11.1476	10.8072	9.55399	9.93986	9.56691	9.91195	10.116	10.2468	10.5574	9.88693	10.2656	9.92316	9.40959	9.9987	10.4099	9.96158	9.72349	9.21172	9.99945	10.1777	10.1947	10.0027	10.4942	10.073	10.4456	10.0605	10.1449	9.97306	10.1586	9.15288	9.08271	9.60401	9.7991	10.0943	10.0817	9.7202	9.74828	9.98602
E11 Pancreatic Progenitor	1434018_at	Fam168b	10.927	11.3058	10.7936	11.1677	10.5885	10.639	11.6035	10.8568	10.1972	11.0315	10.3992	10.3355	9.98224	9.97196	10.2543	10.3112	10.438	10.0015	9.95986	10.1572	10.0142	9.4555	8.92868	9.25865	9.46338	9.74451	10.4229	9.71624	9.86585	9.84547	10.6596	10.5016	10.2127	10.0118	10.8489	10.8065	9.34104	10.6419	10.1485	9.23457	9.32196	8.97204	9.28642	9.01138	8.93617	8.60027
E11 Pancreatic Progenitor	1435899_at	Kdsr	7.63194	7.57106	7.5716	8.07208	7.26601	6.96253	7.66448	7.11311	6.59176	7.46196	7.07134	7.80622	7.92739	6.80812	6.52016	6.89815	7.00047	6.08971	6.89291	6.61397	6.38571	5.78356	6.11073	5.99884	5.71012	5.16553	6.64418	6.05512	5.93133	6.43863	5.86411	7.12719	6.50575	6.335	7.07347	6.52998	6.17882	6.8107	6.94443	5.59956	6.10173	6.0859	5.74614	6.57684	6.36121	5.9608
E11 Pancreatic Progenitor	1434729_at	Zc4h2	7.94533	8.44478	8.59713	8.45351	8.33954	8.06678	8.90174	7.88235	7.66414	8.24989	6.68681	7.03548	6.76667	6.05083	7.85109	7.58186	8.03569	7.28236	7.52741	6.91342	7.13045	5.8856	7.92179	6.83723	7.05507	6.84491	8.27744	7.39837	7.22757	7.19857	7.05773	7.8751	7.73618	7.00247	7.99126	7.99831	7.22919	6.72404	6.70947	5.73877	5.03123	5.80769	5.77086	6.40388	5.64351	5.93574
E11 Pancreatic Progenitor	1424490_at	Zfp428	10.3535	10.1301	9.72988	9.75343	9.58633	9.51742	8.97592	9.09888	9.12917	8.97896	7.21452	7.69692	7.59403	8.10327	9.50053	9.23643	9.51969	8.78589	8.26627	8.39003	9.15046	7.27489	6.19853	8.69273	7.69557	7.85346	9.13652	9.30749	9.08977	9.29395	8.78904	8.96845	8.8206	8.32914	8.61046	8.33757	9.01899	7.93632	8.60843	8.02439	8.59619	8.09869	7.93355	8.21406	7.79266	7.71783
E11 Pancreatic Progenitor	1454092_a_at	Gtf2h3	8.18868	8.9183	8.67019	8.62237	8.08803	7.99255	7.71992	7.65862	7.67248	7.75902	5.89525	6.55981	6.55049	6.17877	7.01853	6.9252	7.68384	6.84217	7.17635	7.34134	6.94546	7.02248	6.49917	6.5758	6.15692	6.6856	7.66537	7.61317	7.86782	7.65099	7.68967	8.06326	7.75713	6.10211	6.93611	6.80849	7.87713	8.16319	8.29114	6.71634	6.31132	6.50536	6.32147	6.19374	6.29225	5.51711
E11 Pancreatic Progenitor	1453186_at	Sfrs18	8.29209	8.92018	8.80522	8.94848	8.25467	8.2324	9.36226	7.99458	7.52133	8.53148	7.70745	7.98094	7.51211	6.82649	8.26551	7.83016	8.50086	7.43174	6.94661	7.49474	7.60693	6.01828	6.12538	6.19544	6.51323	6.16822	8.44557	7.49406	7.79801	7.38659	7.4847	7.882	8.34735	7.03013	8.14054	7.85476	8.14853	8.11503	7.73583	6.61538	5.99888	6.19627	6.30433	6.71273	6.09246	5.80918
E11 Pancreatic Progenitor	1419316_s_at	Gnb1l	8.88917	8.86551	8.52996	8.49372	8.30231	8.22017	8.17771	8.48563	8.60088	8.18511	7.14311	7.2891	7.18736	7.25267	7.29198	7.5799	8.0594	7.57579	6.92463	7.45687	7.22442	7.5924	8.02785	7.27856	7.07806	6.23507	7.05969	7.71883	7.49533	7.38462	8.6329	7.77047	7.26656	8.15746	7.75898	7.35212	7.58555	7.34627	7.36731	7.67688	7.82834	8.2082	7.95891	8.60844	8.56	8.18153
E11 Pancreatic Progenitor	1419660_at	1600012F09Rik	10.5964	10.4718	10.7255	11.0217	10.2313	10.0648	10.0881	10.2967	11.0246	10.419	8.38862	8.71975	9.03973	8.90978	9.55522	9.72957	9.90901	9.12258	9.52445	9.09109	8.68388	9.25267	9.53303	9.06528	8.71754	8.53492	9.65624	9.3582	9.57425	9.73807	9.68824	9.3836	9.46266	9.08611	9.18982	9.28795	9.70102	9.1713	9.49188	9.61949	9.54946	9.97556	9.67904	9.79721	9.65935	9.81596
E11 Pancreatic Progenitor	1430990_s_at	Mrpl44	8.72096	9.15882	9.12842	9.36868	8.87564	8.80113	9.38924	9.29468	8.75855	9.61629	6.55844	6.68212	6.74529	6.93399	8.23449	8.03432	8.70633	7.87727	8.11359	8.13677	8.18954	7.57555	6.83079	6.80569	7.30029	6.75661	8.9782	8.28093	8.47736	8.77422	7.81245	8.19105	8.53703	7.50886	8.56815	8.30828	9.71414	8.81245	9.19074	7.37935	7.63954	6.56888	7.01978	7.82489	6.6991	6.9634
E11 Pancreatic Progenitor	1427085_at	2810432D09Rik	11.3097	10.8519	10.8526	10.7451	10.5642	10.6111	10.4448	11.2353	11.08	10.537	9.09819	9.6327	9.68098	9.71782	10.3274	10.3192	10.6107	8.71358	8.56911	8.27886	7.82238	9.86108	10.0465	9.10035	8.87445	8.4891	9.97269	10.18	9.90266	10.342	10.1165	10.0451	10.0223	10.1053	10.0911	9.93694	10.0765	9.62394	9.97237	9.80557	10.1551	10.0506	10.1599	10.1419	9.98227	9.91982
E11 Pancreatic Progenitor	1444716_at	Mettl2	7.91181	8.3012	8.34201	8.27921	7.47851	7.23118	7.74066	7.82354	7.64417	7.98234	8.09249	7.48557	7.90869	7.5403	7.28729	7.20041	6.9271	6.89245	7.5923	7.57073	7.22106	6.94506	7.35176	7.34479	7.38428	7.67059	7.0298	7.4633	7.44807	7.54516	7.29854	6.45171	6.64903	6.67248	6.61042	6.71232	7.1745	6.68413	6.83148	7.04393	7.14822	7.03678	6.66792	6.68567	6.49964	6.52915
E11 Pancreatic Progenitor	1429961_at	1700021C14Rik	9.47063	9.36579	9.01378	9.07581	8.76318	8.65535	8.46757	9.1608	9.29222	8.87134	8.10365	8.28425	8.35308	8.07601	7.81138	7.92448	8.43898	7.77471	7.62256	7.44927	7.32177	7.92467	9.12469	7.34456	7.68963	7.27507	8.07582	8.29387	8.03774	8.14854	7.65753	7.51283	8.11079	7.78809	8.3089	8.13856	8.28995	7.76909	8.12473	8.04385	8.56056	8.7637	8.17142	8.06746	8.18054	8.23097
E11 Pancreatic Progenitor	1418525_at	Pcm1	7.61	7.888	8.18658	8.19323	7.02197	6.84922	7.19289	6.12731	6.15027	6.51996	6.73227	6.54203	6.68129	5.96842	7.1288	7.13846	7.5159	6.51776	7.36101	7.67887	7.56583	5.73879	6.29693	6.80608	6.80638	6.6195	7.7819	7.50198	7.45425	7.59493	6.78171	7.57022	7.74221	5.55158	6.81193	6.36035	7.63871	6.94586	7.62184	5.78565	6.10099	6.15027	5.26296	6.26985	5.4479	5.81041
E11 Pancreatic Progenitor	1416929_at	Rbm12	8.51845	7.92836	8.36861	8.17268	7.9094	7.42043	7.62781	6.89275	7.28947	7.53156	7.67933	7.75061	7.38914	7.15944	7.89232	7.60985	7.95573	6.53811	6.08408	7.00107	7.11272	6.58054	7.65036	6.63829	6.17449	7.06946	7.36727	7.63115	7.24404	6.89617	7.17759	7.1078	6.69855	6.37289	6.8339	6.11525	7.802	6.67758	7.39619	6.15199	6.56067	6.41379	6.45937	6.35987	6.57708	6.33096
E11 Pancreatic Progenitor	1427830_at	Zfp260	7.81881	8.092	8.2902	8.45137	7.9748	7.99138	7.86215	6.85586	7.91273	7.96139	6.28079	6.49194	6.76503	5.81933	7.77493	7.82385	8.03884	7.25257	6.62108	6.95551	6.64356	5.78645	7.28193	5.88301	6.19159	6.51335	7.86967	7.42455	7.33272	7.86463	7.45729	7.47451	7.30722	7.10985	7.58286	7.43244	4.49994	7.36579	7.63837	6.86215	6.83274	6.86241	6.38959	6.94693	6.51473	6.35987
E11 Pancreatic Progenitor	1443794_x_at	Noc4l	11.9107	11.846	11.4933	11.5019	11.3098	11.4013	11.3748	11.5814	11.6013	11.3909	11.1307	11.1279	11.2379	11.5152	10.479	10.6404	10.8949	10.6049	10.5613	10.394	10.2839	10.7173	10.8841	10.2069	9.71497	9.85364	10.3994	10.4392	10.2645	10.1945	11.4951	10.6953	10.5918	10.8581	10.5568	10.3182	10.1925	10.385	10.2167	10.2739	10.0781	10.7025	10.4021	10.1215	10.159	10.4958
E11 Pancreatic Progenitor	1451317_at	Ythdf2	11.6797	11.1375	11.1396	11.209	10.9508	11.1663	9.83024	9.72899	10.4649	10.4936	11.1277	10.9149	11.2002	10.9554	11.1326	11.1119	10.8413	9.93694	9.82963	10.0604	10.1444	8.59995	8.24875	9.85689	10.1264	10.0083	10.0847	10.7942	10.5051	10.3349	9.44369	9.71773	10.1686	9.38959	9.69476	9.58435	9.73984	10.0404	10.1847	10.1392	10.3113	10.0198	9.62501	10.2095	10.076	10.1299
E11 Pancreatic Progenitor	1455732_at	1700025G04Rik	8.75172	8.55292	9.14497	9.2502	8.61544	8.29685	8.70294	7.94635	8.57222	8.35218	6.76956	6.64133	7.1373	7.50781	6.97576	6.95202	7.02946	8.09454	7.60061	7.3384	6.66516	6.06622	7.69717	7.60098	7.65938	6.67121	7.91948	7.45323	7.42854	7.86398	8.76663	8.4242	8.97013	8.74088	9.06654	9.02323	5.78071	8.45268	7.65277	6.76065	6.24335	6.84959	7.10602	6.75012	6.48433	7.34801
E11 Pancreatic Progenitor	1424142_at	Ikbkap	9.16223	8.82032	8.63221	8.65456	8.13091	8.23102	8.19494	8.12635	8.80494	8.85891	7.7004	7.28343	7.36145	6.96253	7.99909	7.81611	7.86453	7.677	7.02433	6.38948	6.56524	7.58654	8.14482	7.30311	6.987	6.97013	7.86379	8.45764	8.31361	7.8052	6.85763	7.25673	7.20466	7.93412	7.93641	7.50274	8.7289	7.87795	7.99627	7.98316	8.4818	8.48095	7.79959	8.09721	7.51992	7.74926
E11 Pancreatic Progenitor	1424264_at	Med6	11.0571	11.3161	11.5817	11.5116	10.6567	10.572	11.0811	11.0544	11.1364	11.1241	9.81396	9.90572	10.0818	9.98034	10.5093	10.3819	11.1099	10.3709	10.5248	10.3898	10.2856	10.2083	10.3435	9.83584	9.74044	9.63889	10.9214	10.2974	10.2076	10.6819	9.75802	10.2607	9.95468	10.3637	10.4742	10.4389	10.3428	10.258	10.2806	9.70734	9.84159	9.72944	9.51413	9.76774	9.58306	9.21082
E11 Pancreatic Progenitor	1456282_at	6720457D02Rik	9.11213	8.37259	8.40726	8.42206	7.71226	7.65747	7.36329	6.86254	6.62466	7.23975	6.44478	6.72929	6.32555	5.91881	6.92743	6.71781	6.40517	6.20743	6.53032	6.12283	6.47469	6.03677	8.25029	6.69678	7.0297	6.57131	6.1472	6.37635	7.15173	6.63732	8.86436	8.61776	8.63642	6.61506	6.57066	6.84358	9.1793	8.36296	8.38198	7.20941	7.59148	7.25423	6.57349	6.92365	7.00217	6.67098
E11 Pancreatic Progenitor	1429847_a_at	Dcaf17	9.25627	9.66436	9.55725	9.21332	8.91823	8.83216	8.83859	8.69378	9.21887	8.99517	7.88688	8.04061	8.04561	7.82779	8.52772	8.39225	8.66398	8.57651	8.85762	8.78483	8.46885	8.51286	8.00134	8.60385	8.93206	8.02989	8.18898	8.42299	8.35383	8.42186	7.79975	7.45098	8.04478	8.12424	7.93128	8.03822	8.51514	7.31335	7.98954	8.49499	8.78085	8.82177	7.88583	8.23852	8.43685	8.00134
E11 Pancreatic Progenitor	1450478_a_at	Ptpn12	8.78441	9.11511	9.47133	9.66363	8.51164	8.13137	8.77942	7.79197	7.77776	8.25521	8.18773	7.82239	7.8684	7.22149	8.17028	8.13547	8.48182	6.82125	7.08288	7.17605	6.81103	6.31118	5.86006	6.67962	6.55264	6.21941	8.51175	8.03366	7.76858	8.23008	8.71714	8.07919	8.43053	7.69953	8.64657	8.00052	8.8804	8.02725	7.73383	6.77359	6.63366	6.51989	6.33903	6.49372	6.17738	6.75519
E11 Pancreatic Progenitor	1419095_a_at	Apom	10.0253	9.24211	9.3997	9.02296	7.13198	7.14631	6.98897	7.4377	7.09175	7.3817	6.81062	6.51207	6.53755	6.84873	7.96811	7.51073	8.53418	6.66772	8.13658	6.70668	6.7993	7.83111	7.94885	7.32183	7.56953	7.45437	8.69679	7.7965	8.55084	8.18841	8.59643	6.94694	7.28599	6.39411	7.42889	6.76952	7.60806	5.8008	6.53281	6.78034	6.64311	6.83509	6.41207	6.28276	6.02377	5.76374
E11 Pancreatic Progenitor	1443152_at	Ptcd3	7.99494	7.71488	7.36872	7.64766	7.2424	7.23619	6.36747	6.69554	6.88938	7.57015	6.3824	5.86004	6.12892	6.68102	7.32133	7.22904	6.64611	6.00105	5.78838	5.61144	7.02327	6.18239	5.70927	6.80394	6.97444	6.95181	6.73086	7.76589	7.33951	7.11323	6.14912	6.72078	6.68109	6.14011	5.98657	6.25831	7.40737	6.79219	6.63867	6.4894	6.22509	6.12308	5.97256	5.66498	6.21543	6.03592
E11 Pancreatic Progenitor	1446426_at	Enah	8.30265	7.50841	7.88168	7.74797	7.91121	7.46825	7.04149	5.08148	5.86312	6.31855	7.47745	6.60165	7.25427	6.67723	7.74827	7.20446	6.1023	6.07063	6.45271	6.42969	6.77138	4.91616	4.55154	7.08145	8.06353	7.99571	5.8844	7.44963	7.68559	7.08566	5.91972	6.51435	5.93288	5.87868	5.23961	6.12064	7.76989	6.40709	6.85257	6.71943	6.91522	5.59129	5.4322	6.52418	5.98922	6.40593
E11 Pancreatic Progenitor	1442728_at	Nasp	8.50553	8.14599	7.79936	7.73304	8.1778	7.35127	8.38079	7.64187	7.68788	8.34457	8.87365	7.47393	7.40441	6.62842	7.02634	6.89724	6.35705	7.11443	6.61516	7.23758	7.1176	5.16573	5.11015	5.95275	5.16827	7.91838	6.85344	6.80086	7.24075	6.45695	5.89969	5.99194	5.06691	5.95648	5.87059	6.52936	7.22323	6.76602	6.11718	5.76925	6.19649	5.94881	6.65274	5.59168	7.40711	5.33979
E11 Pancreatic Progenitor	1437813_at	Aim1l	7.85077	7.59477	7.50132	8.12361	7.53967	7.43446	7.47951	7.32612	6.5023	6.97765	6.08745	6.40675	6.42983	6.36208	7.63712	7.36598	8.30445	6.58897	6.45807	6.39597	7.15852	6.5978	6.98724	6.17506	6.10316	6.11087	6.45027	6.45938	5.67391	6.61729	5.95164	6.48476	6.5561	6.72806	6.6673	6.20849	6.80737	6.03276	6.1018	5.78565	6.71219	6.7899	5.78283	6.30619	6.22215	5.60011
E11 Pancreatic Progenitor	1458684_at	Ss18	9.75331	8.8738	9.28741	9.22904	8.70547	8.29272	6.81533	6.55351	6.92447	7.49497	9.70537	8.73531	8.53336	8.35682	8.89488	8.41585	7.81013	7.42055	7.54807	8.68817	7.8774	5.4697	7.76181	8.00493	7.85749	7.97612	7.13552	7.85669	8.44217	8.02714	8.5405	9.06527	9.34676	5.89123	5.83996	6.91975	7.08451	8.95477	8.51901	7.95357	8.74875	7.78327	7.97281	7.66526	8.87878	8.66393
E11 Pancreatic Progenitor	1418460_at	Sh3d19	10.0777	10.2618	9.70582	9.80046	9.71395	9.82714	9.49265	9.38084	9.76321	9.57959	9.51805	9.68177	9.91938	9.59793	9.26437	9.15267	9.36128	9.37395	9.08819	9.03789	9.65752	7.24754	8.54923	8.41585	8.31287	7.6134	8.42451	8.93296	8.63927	8.67899	8.88582	8.67187	8.60048	8.49497	8.77889	8.54021	9.19288	8.3155	8.72584	8.35877	8.65104	8.64456	8.99271	9.11034	9.08516	8.65591
E11 Pancreatic Progenitor	1455270_at	Adam11	8.62067	8.37773	8.02558	8.32943	8.00086	8.092	7.80114	7.84893	7.80304	7.59927	7.13241	7.04187	7.31751	7.31611	7.82	8.1334	8.10391	7.64526	6.67014	6.9351	6.61215	7.28139	7.43273	6.78031	6.81864	6.79232	6.73817	6.67328	6.83125	7.01725	7.51576	6.90323	6.87926	7.35465	7.17009	7.02073	8.27496	7.21689	6.62981	7.19583	6.93899	7.10984	7.2259	6.81269	7.3763	7.1408
E11 Pancreatic Progenitor	1454750_a_at	Dcaf15	10.236	9.99904	9.70465	9.94873	9.28581	9.23118	9.46536	8.8249	8.90121	8.72453	8.44141	8.67752	8.48626	8.7141	9.31695	9.32999	9.35944	8.33127	8.25723	8.63096	8.64653	8.882	8.34889	9.25773	8.68228	8.74352	9.42355	9.38933	9.31802	9.63541	9.21428	9.34749	9.19168	9.06369	9.0531	9.05479	9.51985	9.00933	9.04636	9.07053	9.14437	9.003	8.75562	8.66665	8.98866	8.12857
E11 Pancreatic Progenitor	1447857_at	Enox1	9.12022	8.46429	9.15145	9.21281	8.10464	7.94935	8.0383	6.7163	6.68445	6.82366	5.45503	5.59632	5.70502	5.9958	7.73864	7.74739	6.71817	7.60092	8.45854	8.8366	7.98055	8.21067	8.36142	8.05196	8.92321	8.119	7.3504	8.09251	7.54786	8.00709	7.53191	7.33243	7.39918	7.71051	7.05	7.35406	8.53539	7.15505	7.45197	9.28349	9.08596	9.09042	8.4434	8.96505	9.08357	9.41808
E11 Pancreatic Progenitor	1436457_at	F830028O17Rik	10.0503	9.87181	10.1716	9.44839	9.36895	9.0587	8.42778	8.05423	8.4798	8.85295	8.91092	8.85298	9.11566	9.8174	9.67411	9.36106	8.78444	8.84283	9.36309	9.6926	8.65374	7.61907	6.55412	7.82312	8.48204	8.30655	8.74221	8.90153	8.89635	9.30921	8.96118	9.07392	9.12054	7.98275	8.47123	8.83097	10.353	8.99267	8.72419	8.83298	9.00506	7.32389	7.27235	8.63524	8.12103	7.27747
E11 Pancreatic Progenitor	1419096_at	Apom	9.35179	8.92125	8.74953	8.35061	6.48141	6.56619	6.59605	6.81285	6.74351	6.73391	6.16825	6.22742	5.86565	6.49159	7.6699	7.0943	8.26122	6.4838	6.93769	6.55258	6.75723	7.4988	7.73172	6.6608	7.21821	7.00406	7.85827	7.46439	7.89787	7.8515	6.67116	6.58361	6.98522	5.8281	6.80073	6.29994	6.98906	5.88701	5.91635	6.59252	6.39164	6.62714	6.23011	6.13612	6.14572	6.0255
E11 Pancreatic Progenitor	1416208_at	Usp14	10.263	10.5942	10.9047	10.7914	10.3165	10.4101	10.7537	10.6977	11.187	11.0644	9.40144	9.63122	9.41226	8.91942	9.80503	9.86913	9.76116	9.37356	9.43943	9.72231	9.37159	8.97942	8.99921	9.36023	9.35257	9.54779	10.3518	9.79278	10.0886	9.88546	9.13556	9.65512	9.4749	9.78937	9.73718	9.75326	8.54388	9.2954	10.0027	9.24525	8.70624	8.31394	8.59498	9.03978	8.79252	8.97672
E11 Pancreatic Progenitor	1417570_at	Anapc1	7.59107	7.89321	8.18972	8.35	7.84683	7.73972	8.4068	7.39251	7.49198	7.65612	5.75457	6.16616	6.12525	5.80781	7.32352	7.1249	7.27086	6.88036	6.53984	6.79627	6.78062	5.70945	5.20206	5.99175	6.21325	6.45023	8.45016	7.30907	7.54676	8.03461	7.21199	7.14183	7.37828	6.26592	7.67471	7.92548	7.31024	7.60807	7.63839	6.48489	6.05032	5.86015	5.93004	6.11729	5.85335	5.63746
E11 Pancreatic Progenitor	1426592_a_at	Fbxo22	10.1636	10.2072	10.6062	10.6593	10.2133	9.9047	10.2152	9.36559	9.78262	9.96284	8.86609	8.94404	8.85989	8.55999	9.56959	9.6098	9.81029	9.24241	9.10487	8.78735	9.32555	8.25455	8.41353	8.82444	8.36436	9.09757	9.94688	9.55172	9.59193	9.50613	9.58004	9.55729	9.58898	9.34968	9.5881	9.2228	9.98201	10.01	10.072	9.44735	9.49837	9.51507	9.46776	9.47007	9.62269	8.93026
E11 Pancreatic Progenitor	1452315_at	Kif11	8.03162	8.09187	8.7818	9.01531	8.28719	8.20826	8.80721	8.99885	8.88057	9.69489	5.81466	5.67118	5.63074	5.78226	6.34401	6.19831	6.70285	6.46786	6.47664	6.37076	6.33559	6.47179	6.43381	6.30651	6.51492	5.31928	6.64764	6.13436	5.84856	6.39417	6.13472	6.81688	6.78559	6.55357	6.95858	7.35711	6.00167	6.72853	6.51404	6.57734	6.55993	6.24654	5.94545	6.18309	5.8777	5.9093
E15 Pancreatic Progenitor	1429061_at	1810063B05Rik	10.3199	10.382	10.4924	10.3719	11.5255	11.6476	11.5999	10.625	10.5381	10.5165	10.3066	10.5736	9.94883	9.99585	10.5561	10.5598	10.2522	10.6752	10.1017	10.3799	10.5749	10.1676	9.04311	9.34815	9.59103	9.82805	9.65421	9.60123	9.88522	9.49206	9.62931	9.32282	9.37775	9.22589	9.84863	10.1191	9.69428	9.50768	9.80231	9.97188	9.43524	9.56202	9.68698	9.87096	9.68181	9.964
E15 Pancreatic Progenitor	1460314_s_at	Hist2h3b	10.0503	9.85679	9.45503	9.47165	10.5342	10.4082	10.5197	9.93921	9.94985	10.1083	8.86757	8.34872	7.88714	8.22817	9.66456	9.58844	9.5481	9.03858	9.11151	8.56418	8.47178	10.1139	9.92609	7.52548	8.05484	7.52671	8.37465	8.68333	9.21861	8.40745	8.96032	8.94654	9.08426	8.64587	8.73256	8.89155	9.48549	8.4508	8.48579	9.80549	9.68035	8.79678	8.80718	8.38082	8.9863	8.61288
E15 Pancreatic Progenitor	1421338_at	Elf4	8.03472	8.4524	8.90325	8.99587	9.14206	9.29762	9.12819	8.1022	7.8287	8.27562	7.20177	7.17474	7.34109	7.45813	7.42384	7.60824	7.97978	7.81379	6.69617	7.82475	8.31824	6.54002	6.08772	5.4878	6.59491	7.04974	7.72853	6.61824	7.35498	7.62634	7.38537	7.56881	7.06615	6.60272	7.43578	7.30794	7.04901	8.17512	7.63186	6.66701	6.64278	5.78246	6.31824	6.09887	6.31191	5.59224
E15 Pancreatic Progenitor	1425166_at	Rbl1	9.41969	9.49116	9.32411	9.4061	10.3594	10.2535	10.2386	9.38376	10.0266	9.81125	9.26846	9.46585	9.10322	9.35979	8.85311	8.60447	9.05996	9.52731	9.98365	9.48288	10.0758	8.35082	8.00205	9.15578	8.15806	8.08244	7.77489	7.83562	7.62143	8.00706	9.14283	8.85053	9.13952	8.90207	8.69006	8.5581	6.62002	8.56228	8.72237	8.54878	8.09141	8.78533	8.23185	8.12593	8.64993	8.27363
E15 Pancreatic Progenitor	1456022_at	Hipk2	9.93088	10.2582	10.4207	10.5322	11.2998	11.2038	11.3487	10.8886	10.483	11.1196	9.2428	9.4601	9.59547	8.95754	10.787	10.5171	10.2537	10.1107	9.90584	10.1794	9.70658	8.09253	7.59821	7.76984	7.59453	7.99106	10.4193	10.2296	10.1841	10.1976	8.81034	9.60075	9.32565	9.02267	9.7974	9.81234	9.95193	9.48867	9.75091	9.63187	9.16532	8.77764	8.88813	9.50719	9.27127	9.09934
E15 Pancreatic Progenitor	1437983_at	Sall1	8.18307	8.06978	8.30686	8.30004	11.1998	11.1109	11.3076	8.59006	7.56794	8.05043	10.3084	10.6375	10.355	10.1846	10.2471	10.3813	10.3231	10.3307	9.81724	10.3252	10.5206	8.17119	7.74883	8.14204	9.18739	9.10487	8.86959	9.23401	9.78253	8.3638	8.58142	9.53277	9.43087	8.69676	9.22783	9.68383	10.0698	8.34411	9.16917	9.50448	9.45841	8.67009	9.93675	10.3842	10.4475	10.323
E15 Pancreatic Progenitor	1452071_at	Slc4a4	8.64723	8.62464	8.69267	8.63253	9.42693	9.25357	9.37331	7.19797	7.72482	7.62476	9.29571	8.3967	9.53225	7.50662	7.48168	7.76362	7.74642	7.62513	7.03176	7.50512	8.26253	6.50512	7.07189	7.60022	8.00631	7.70809	7.5196	7.14056	7.61568	7.97409	7.57953	7.62714	7.48249	7.00149	7.42946	7.56993	9.24797	7.16615	7.83012	7.05583	7.06064	6.98622	7.29864	7.75666	7.82094	7.70666
E15 Pancreatic Progenitor	1435185_at	Lrrcc1	7.91753	8.35603	8.47308	8.83096	8.72385	8.60189	8.63497	7.61376	7.97827	7.9532	6.63434	6.90302	6.68424	6.07011	7.77229	7.74656	8.03504	6.79273	7.31368	7.80312	7.69735	6.01723	6.22436	6.53095	6.82472	5.72442	8.24641	7.92791	7.81007	7.61802	6.97752	7.33601	7.37681	7.26695	7.94134	7.72901	7.41785	7.4107	7.85746	6.22198	6.0747	5.7873	6.16351	6.62395	5.86236	5.6656
E15 Pancreatic Progenitor	1447372_at	Aldh16a1	9.43821	9.21493	9.12603	9.16305	9.56637	9.53096	9.4657	9.87972	9.84824	9.28735	8.53668	8.76025	8.26908	8.83234	8.45667	8.49649	8.59116	7.60458	7.44237	6.96127	6.72133	7.37274	8.39688	7.4673	7.93049	6.7511	7.79758	8.22001	7.70376	7.98329	8.28529	7.82925	8.52999	8.81309	8.56506	8.591	8.6589	7.42737	7.28508	7.88837	7.9862	8.39885	8.57059	8.09139	8.01569	7.91764
E15 Pancreatic Progenitor	1439443_x_at	Tkt	13.5321	13.6098	13.4866	13.5868	13.8596	13.7781	13.7344	13.5119	13.5569	13.4347	12.4993	12.8605	12.9043	13.087	12.4434	12.3943	12.7615	12.6387	12.444	12.2822	12.6354	12.0901	12.0863	12.0823	11.677	11.4585	12.6546	12.6268	12.4716	12.7045	12.8454	12.7421	12.7452	12.9224	12.9076	12.8524	12.9236	12.4436	12.3163	12.4591	12.3833	12.7381	12.8356	12.5462	12.6003	12.5892
E15 Pancreatic Progenitor	1426570_a_at	Frk	8.16593	8.21756	8.47203	8.46575	9.20595	9.24191	9.28289	8.82034	8.75077	9.06748	8.89812	9.4966	9.47105	8.73152	7.527	7.67085	7.7292	8.56003	8.05968	8.29063	8.0634	7.15988	7.86066	8.19562	8.23369	7.88185	7.8969	7.58895	7.56557	7.52107	7.93719	7.36861	6.85242	7.17719	7.75005	7.65799	4.96483	8.04512	8.68932	7.67083	6.8535	6.97455	7.3729	8.10652	8.37071	8.52872
E15 Pancreatic Progenitor	1452308_a_at	Atp1a2	6.70722	6.98813	6.67366	6.84496	9.9628	9.71098	9.80153	7.52511	7.3709	6.85782	6.11022	6.70859	7.01993	7.04048	7.03425	7.2145	7.91717	8.59148	7.56666	6.86325	7.65386	6.98453	7.0406	6.76317	6.13235	6.59896	6.83913	6.47478	6.31088	6.62525	8.38855	7.03852	8.16605	8.1648	8.68823	8.74198	7.40718	7.58415	6.72645	6.2757	6.18816	6.36189	6.98835	6.59558	7.03224	6.65719
E15 Pancreatic Progenitor	1424750_at	Zbtb1	10.7244	10.8429	10.8109	10.7905	11.4459	11.4149	11.3842	11.4018	10.7168	11.436	10.6848	10.6651	10.7482	9.9312	10.8965	11.017	10.9558	10.7812	10.5968	11.0827	10.8265	8.64442	9.22195	9.70858	9.5704	10.091	11.0619	10.8089	10.924	10.323	10.3348	10.1446	11.4616	10.113	10.9648	10.7804	10.5007	10.5657	10.3826	9.60296	9.04339	9.01158	9.14447	9.57227	9.82622	9.84711
E15 Pancreatic Progenitor	1421193_a_at	Pbx3	10.0794	10.1597	10.0673	10.1744	10.3155	10.2231	10.2186	9.59765	10.2244	10.1301	8.85609	9.11716	9.22164	8.70962	9.47937	9.33151	9.53658	9.59722	8.89342	8.82812	9.38667	7.64622	7.23569	8.5849	9.00267	8.77942	8.79493	8.8778	8.54376	8.89814	8.56749	8.54079	8.15555	8.4363	8.68582	8.41686	10.0137	9.33829	9.75598	9.56249	9.82795	9.59307	9.63563	9.98712	9.73776	9.87236
E15 Pancreatic Progenitor	1457676_at	Tirap	8.84562	8.67703	8.58875	8.67826	9.33559	9.49125	9.3416	9.56778	9.23183	9.82553	8.83429	9.2004	9.57541	8.87322	7.27945	7.80809	7.7268	8.55079	8.53494	8.80322	8.57872	7.89325	7.90938	7.2471	7.3936	7.40463	7.56063	7.73937	7.61077	7.49886	7.78494	8.06428	7.88807	8.46238	8.42074	8.28018	7.17967	7.57155	7.23074	7.36405	7.31874	7.65262	7.55894	7.75783	8.03601	7.31628
E15 Pancreatic Progenitor	1448276_at	Tspan4	9.09585	9.06388	8.66356	8.83531	9.34824	9.3448	9.3447	9.48747	9.26429	9.16906	8.66752	8.89055	9.09944	9.06447	7.52423	7.67476	8.1464	8.69098	7.98921	7.92997	8.08373	8.05987	8.129	7.49689	7.11565	7.10108	8.16489	7.77572	7.75233	8.16896	9.35062	8.57635	8.73327	9.84172	9.56628	9.28688	7.79009	8.3962	7.28468	7.71734	7.54008	7.97197	7.61791	7.67793	7.58078	7.89668
E15 Pancreatic Progenitor	1434699_at	G2e3	10.1205	10.3342	10.3847	10.5561	11.0206	10.8209	10.8784	11.2641	10.7516	11.4029	9.00288	8.73898	8.68697	8.37335	10.2369	10.333	10.2916	9.63821	9.27257	9.79187	9.79797	7.70837	8.23404	8.77287	9.20247	8.7721	10.0424	9.76727	9.88729	9.86748	9.16438	10.0358	10.1209	9.27577	9.94869	10.184	7.06415	9.80857	9.51432	8.55161	8.14901	8.75538	7.7368	8.942	8.73681	8.08087
E15 Pancreatic Progenitor	1448917_at	Med30	10.3361	10.3061	10.1473	10.2658	10.8887	10.8794	11.0618	11.1797	10.6291	11.2288	8.89191	8.90912	8.65866	8.46463	10.1495	10.1794	10.232	9.33834	9.42959	9.54834	10.023	8.20279	7.79924	8.82558	9.02827	8.34676	10.4825	10.2323	10.3076	10.1008	9.88568	9.96197	9.94883	9.50883	10.4247	10.1731	8.78051	9.8858	9.88966	8.79358	8.87073	8.72677	8.71484	8.84627	9.05239	8.79648
E15 Pancreatic Progenitor	1436708_x_at	Mcm4	11.9596	12.214	12.227	12.1817	12.6985	12.825	12.8042	12.5044	12.7153	12.6158	11.7552	12.0512	11.5261	11.8245	12.0881	12.4186	11.95	12.3166	12.4159	12.4446	12.3389	11.1902	11.3508	11.3243	11.2695	11.2202	11.5472	11.2732	11.3713	11.0045	11.2435	11.6769	11.0928	11.9941	11.7448	11.8644	7.30521	10.8511	11.1383	11.8597	11.0341	11.3771	11.3411	11.1748	11.217	11.3446
E15 Pancreatic Progenitor	1418467_at	Smarcd3	10.3521	10.2857	9.92943	10.0702	10.5091	10.2859	10.52	10.3422	10.5058	10.0554	8.93318	9.61766	9.70004	9.46755	7.84532	7.73212	8.66807	8.58842	7.78933	7.65805	7.81815	9.16753	9.25144	8.65514	8.58446	8.15574	8.24458	8.25985	8.03443	8.40083	9.84054	8.60992	8.80881	9.53106	9.50587	9.54631	7.12093	7.72571	7.21564	7.07114	7.58143	7.25519	8.22517	8.36605	8.22415	8.15487
E15 Pancreatic Progenitor	1435753_a_at	Nucks1	10.292	10.4663	10.7347	10.5213	10.9924	10.9761	11.0595	11.8406	11.2409	11.5145	9.67735	9.72083	9.62855	9.00742	10.0799	10.2681	10.2821	9.97667	9.97141	10.3492	10.0899	9.70315	8.4132	9.36002	9.47731	10.0132	10.669	10.4555	10.5439	10.1079	9.89579	10.4011	10.2169	9.35815	9.88514	10.0277	6.48169	10.3922	10.151	9.42848	9.10906	9.26654	9.45453	9.23021	9.05191	9.58376
E15 Pancreatic Progenitor	1437626_at	Zfp36l2	11.476	11.7736	11.8599	11.9045	11.8541	11.9091	12.0263	10.6772	11.0735	11.1932	11.781	11.5318	11.3545	11.0241	9.81627	9.73118	10.2831	11.2479	11.0175	11.1478	11.1569	9.78654	9.36349	10.3686	10.0454	10.7616	10.3559	9.85816	10.1115	10.0487	11.4987	11.5799	11.2367	11.1305	11.7394	11.7119	11.3742	11.9294	10.9849	9.96307	9.83884	8.61093	10.6546	10.7404	10.3971	10.1099
E15 Pancreatic Progenitor	1434742_s_at	Aifm3	8.21976	8.23174	8.05893	8.11248	8.70129	8.5878	8.70732	8.82472	8.70495	8.3083	7.78119	8.01391	8.40123	8.16469	8.16064	8.07961	8.57176	6.81296	6.4379	6.69402	6.70714	8.53096	9.04116	7.45149	7.32407	6.48228	7.4775	7.83473	7.44183	7.95597	6.28005	7.14156	7.84828	6.64975	6.87	6.82832	8.85102	6.50255	6.41084	6.9899	7.08636	7.51455	7.87133	7.97459	8.19108	8.35998
E15 Pancreatic Progenitor	1423682_a_at	Cdca4	10.7483	10.8192	10.8337	10.9209	11.157	11.0686	11.2556	10.9454	11.0223	11.0327	10.7443	10.7396	10.5531	10.4105	10.634	10.5647	10.3847	10.5438	10.422	10.6036	10.5595	8.86274	9.09941	8.70194	8.83014	9.14181	10.5518	10.0736	10.4648	10.3035	10.2533	10.2204	10.1452	10.1384	10.2875	10.2429	7.74834	9.9447	10.1791	9.24538	9.05145	8.91375	9.02454	9.18307	8.81875	8.99919
E15 Pancreatic Progenitor	1427567_a_at	Tpm3	9.32587	9.65974	9.60669	9.59893	9.76801	9.74969	9.60294	9.10751	9.22583	9.59317	9.50892	9.54895	9.31417	9.19902	8.79654	8.87008	9.00995	8.45749	8.37752	8.6137	8.28133	6.69138	6.39244	7.33403	7.01692	7.8766	9.24787	8.78325	8.73619	9.09877	8.59396	8.59051	8.53809	8.80455	9.12737	8.87693	9.46003	8.80643	8.80106	7.75439	7.56136	7.31007	7.69674	8.03626	7.79554	7.71864
E15 Pancreatic Progenitor	1432332_a_at	Nudt19	10.1848	10.1345	10.1007	10.2122	11.5977	11.5286	11.8503	10.9785	11.1101	10.6692	10.5111	11.6281	11.9567	11.8116	8.88334	8.99865	9.82981	9.33255	10.1149	9.82069	9.53088	8.74824	9.7046	8.46034	8.53238	7.76624	9.04441	8.91832	9.28784	9.1484	8.67515	8.8852	8.70786	9.58294	9.81878	9.73518	7.49244	8.48588	9.08115	8.77344	9.18088	9.36455	9.84558	10.0117	9.70275	9.19042
E15 Pancreatic Progenitor	1448659_at	Casp7	9.84939	10.3164	10.2504	10.2422	11.1105	10.923	11.0689	11.271	10.7016	11.2978	9.91372	10.162	9.92184	9.38594	10.5921	10.5847	10.4891	10.7713	10.6789	10.8212	10.4814	7.70021	7.88021	8.94683	8.38418	9.48894	10.7819	10.4445	10.0868	9.94823	9.86402	10.0793	9.81103	9.74092	10.7271	10.6138	7.8188	10.346	9.93746	8.90666	8.65821	8.21225	8.21393	8.94344	8.58221	8.14121
E15 Pancreatic Progenitor	1416806_at	Fdxr	9.33238	9.24473	9.04487	9.17075	9.86588	9.72248	9.73167	9.37932	9.3729	9.00136	8.38202	8.51506	8.70476	8.73765	8.89051	8.95557	9.18607	8.00806	8.03279	8.05679	8.03526	9.22607	9.04622	8.88749	8.6175	8.78709	8.36031	8.5941	8.46597	8.72072	8.82203	8.44507	8.42858	8.44524	8.24628	8.31802	9.53775	8.28779	8.34164	8.45641	8.82943	8.5943	8.46248	8.3705	8.62124	8.325
E15 Pancreatic Progenitor	1423872_a_at	Dag1	7.41328	7.33142	7.82019	8.06525	9.54012	9.42096	9.6665	9.58618	9.3506	10.1706	7.87452	8.11822	7.99222	7.48802	8.88818	8.7043	7.87171	8.34974	7.4946	8.20996	8.62054	6.75467	5.05611	6.34138	6.70559	7.0901	8.50805	8.77652	9.06995	8.82614	7.55388	7.60933	7.49513	8.71809	9.30198	9.51525	9.61017	8.98935	9.12032	8.81	8.52924	7.86638	8.0126	8.20365	7.67985	7.47043
E15 Pancreatic Progenitor	1447802_x_at	AV099323	8.89172	9.60232	9.04354	9.30457	9.42527	9.39189	9.23339	9.69533	9.32894	9.05807	6.78287	7.03036	7.12207	7.60745	8.18387	8.70503	8.96572	8.89729	9.16642	7.86088	7.65386	8.97328	8.7066	8.36598	7.3091	7.71548	8.50845	8.34511	8.07475	8.54714	8.29962	7.9935	7.8645	8.01432	8.09598	8.31457	9.67803	8.26485	8.18598	8.02268	7.74832	7.25966	7.39763	7.94628	6.87325	7.35968
E15 Pancreatic Progenitor	1450035_a_at	Prpf40a	8.60981	8.48675	8.72689	8.71937	9.00522	8.96569	9.18267	8.69296	9.17061	9.28199	7.75192	7.93142	7.55093	7.5817	9.01336	9.17076	8.48445	7.16898	7.64346	7.52201	7.63794	5.90415	6.29543	6.24148	7.02169	7.32227	8.30762	8.99089	8.52842	8.22817	6.52782	7.77768	6.90879	8.05282	8.11793	7.82046	5.39588	7.31969	7.84456	7.88748	8.1344	8.15476	7.86197	7.52834	7.2423	7.70941
E15 Pancreatic Progenitor	1423800_at	Dars	10.5992	10.7782	11.0349	10.8413	10.843	10.9949	11.0364	11.0875	10.743	11.2838	8.88669	9.61789	9.40127	8.64687	10.3387	10.5789	10.5071	9.86654	9.96792	10.1481	9.87632	8.43023	8.00776	9.65922	9.40866	9.78622	10.817	10.6362	10.4199	10.6662	10.4108	10.5877	10.5252	9.45656	9.9978	10.1142	7.68989	10.2643	10.3855	8.95422	8.69288	8.87592	8.76207	8.94973	8.62341	8.8368
E15 Pancreatic Progenitor	1437289_at	Impad1	10.8629	11.1297	11.2351	11.1576	11.3005	11.147	11.1718	10.4673	10.4743	10.956	9.76248	10.2445	10.1961	9.5514	10.8617	10.7249	10.7271	10.526	10.4651	10.8636	10.9352	9.22952	8.00319	9.19215	9.22192	9.74821	10.8717	10.6565	11.1052	10.7306	10.5718	11.0402	10.9531	10.0843	10.7129	10.5321	7.24752	10.6807	10.8595	9.96726	9.56649	8.92657	8.72434	9.67221	9.22356	9.03162
E15 Pancreatic Progenitor	1453784_at	Ilkap	8.53857	8.4131	8.22683	8.33046	8.70038	8.95119	8.94432	9.18611	9.53043	8.8428	7.00905	7.0859	7.06254	7.17464	7.48692	7.81795	7.8317	6.66247	7.36257	6.93046	7.16151	8.50003	8.00413	7.4963	7.74517	7.67491	6.66477	6.77487	6.66146	6.71667	7.11753	7.31092	6.57059	7.47636	7.36147	6.89954	6.80481	6.18988	6.50518	7.13175	7.00069	7.4305	6.874	6.6947	6.90847	6.19292
E15 Pancreatic Progenitor	1422670_at	Rnd2	9.06241	9.01522	8.76565	8.75192	9.03995	9.12808	9.24442	10.0975	10.1301	9.23645	9.29233	8.36448	9.10017	8.83356	7.01272	7.16301	7.84945	7.83836	7.9895	7.99718	8.1249	9.32596	8.63232	8.6675	8.38331	7.64031	7.9158	8.07509	7.80451	7.74835	7.87864	7.84466	7.15876	8.06147	8.24189	7.66893	7.27319	6.20011	7.44035	6.3211	6.84362	6.84839	7.99919	7.30702	7.53041	7.87645
E15 Pancreatic Progenitor	1426911_at	Dsc2	10.306	10.6398	10.7563	10.6811	11.781	11.6449	12.0187	11.0325	10.8374	11.1368	11.0477	11.6152	11.3062	11.241	10.8962	10.7677	11.0756	10.2221	10.1751	10.351	10.4391	8.92044	7.58619	7.91516	9.14351	8.24149	10.4548	9.86584	9.90155	9.94873	9.19378	9.9924	9.71184	9.46885	10.0428	9.84648	9.94169	10.3916	9.72422	9.07478	8.6862	8.13457	8.678	9.53124	9.38245	8.73939
E15 Pancreatic Progenitor	1417410_s_at	Prkci	11.1898	11.486	11.6161	11.7215	12.6107	12.4311	12.3534	12.1293	12.0306	12.1272	12.0092	12.0314	12.0464	11.8258	11.4105	11.2925	11.13	11.5223	11.3589	11.7344	11.478	10.4692	10.0947	10.5835	10.7548	11.2321	11.5473	11.3966	11.5044	11.2083	10.8827	11.1365	11.2684	11.0903	11.623	11.4956	8.62724	11.08	11.0061	10.8303	10.238	10.024	10.3428	10.854	10.5007	10.4305
E15 Pancreatic Progenitor	1429488_at	Zdhhc21	9.96897	9.4187	9.68174	9.66576	9.87028	9.66573	9.70779	9.56973	9.69446	10.2463	8.56697	8.52538	8.50609	8.01816	10.1245	9.74182	9.01299	8.32203	8.41297	7.93644	8.78437	5.76111	7.0427	8.76636	8.91231	8.39539	9.27541	9.49638	9.72368	9.23974	7.3783	7.94786	7.88904	8.94589	8.5347	8.4574	8.74266	8.60555	8.79221	8.49034	8.43988	8.83845	8.38009	8.29721	8.74988	8.75026
E15 Pancreatic Progenitor	1424692_at	2810055F11Rik	8.84491	9.1255	9.19637	9.42524	10.5813	10.253	10.5241	9.21343	8.63487	9.43348	9.44946	9.77647	9.19814	9.13275	8.98832	9.29312	9.48262	9.66903	8.81532	8.53931	8.73274	7.93685	7.64559	7.79962	7.61153	8.33675	8.46223	8.08435	8.52261	7.90225	9.89217	9.03722	9.51931	8.64962	9.44641	9.67648	7.80848	8.60162	7.77264	7.63284	7.05673	6.93306	7.42747	7.84126	7.55564	7.46211
E15 Pancreatic Progenitor	1430717_at	Fam83e	6.48918	6.31169	6.02853	6.11797	7.59467	7.58849	7.79117	6.44594	6.52164	7.03879	7.28144	7.92184	7.88086	8.71206	7.03774	6.89178	7.19114	6.21213	7.16683	6.69605	6.8575	8.42145	6.5253	6.68216	6.76171	6.39978	6.06083	6.19704	6.3512	6.01	6.09651	6.46528	6.24234	6.24333	7.11108	5.82351	6.9039	5.11002	5.77128	6.24961	6.32805	6.29868	6.75599	6.56148	6.30538	7.13663
E15 Pancreatic Progenitor	1437942_x_at	Tube1	7.55567	7.67939	7.76239	7.68873	8.14366	8.3265	8.0554	8.78471	8.54986	8.23501	6.17832	6.59782	6.28063	6.69134	7.35364	7.12947	7.14038	7.41602	7.04044	7.59069	6.83447	7.36023	6.6192	6.20635	6.66376	7.00884	7.17796	6.4777	6.95002	6.76339	6.59622	6.82517	6.87626	6.47268	6.61118	6.93406	6.30601	6.35735	6.24063	6.74819	6.10589	5.95756	6.42992	5.89682	5.88243	5.82564
E15 Pancreatic Progenitor	1430500_s_at	Mtx2	10.1585	10.3211	10.5095	10.5032	10.7496	10.5972	10.8291	10.4414	10.4936	10.9059	8.67188	8.53475	8.50723	7.78774	10.4181	10.3087	10.2804	10.0302	9.88377	10.076	9.93168	8.86065	7.37923	9.31982	9.19836	9.53409	10.7653	10.4404	10.7525	10.3984	10.908	10.4625	10.1996	10.0372	10.5186	10.4393	10.3121	10.1031	10.1662	8.65149	8.20929	8.50896	8.14729	8.61061	8.64583	8.56854
E15 Pancreatic Progenitor	1420906_at	Cd2ap	8.51245	8.37255	9.68395	9.63485	9.56767	9.29372	9.40792	8.80984	9.13864	10.0272	9.18387	9.59238	9.74432	8.53716	8.43066	8.10671	8.71018	7.85754	7.824	8.19144	8.18324	6.39867	7.28098	7.98387	7.27249	7.47389	8.919	9.09823	8.49266	8.0448	7.66702	8.12415	7.9047	7.549	8.43961	8.14552	8.72259	9.21212	9.10958	7.80974	7.17288	7.79719	7.16185	7.59628	7.5648	7.39624
E15 Pancreatic Progenitor	1418490_at	Sdsl	8.4103	8.20262	7.92963	8.1213	9.16481	9.24648	9.46904	9.99862	9.38255	9.29724	7.50079	7.88157	7.85772	7.84339	7.83042	7.69092	8.09022	7.10717	7.42791	6.95218	6.81268	7.53032	7.87766	7.37073	7.33562	7.23043	7.62676	7.46637	7.53938	7.96833	7.12808	7.33074	7.24307	7.24507	7.0728	7.37542	8.9421	6.89518	7.44232	7.41305	7.29483	7.87381	7.39341	7.40495	7.34331	6.97967
E15 Pancreatic Progenitor	1450899_at	Nedd1	9.22597	9.31234	9.30372	9.28503	9.56099	9.59796	9.82864	9.32477	9.36326	9.81548	8.83184	9.35092	8.68329	8.21504	8.86132	9.00584	9.06415	9.05381	8.7345	9.19328	9.18639	6.99426	8.13001	7.76	7.93509	7.51647	8.69947	8.7016	8.82344	8.51394	8.13572	8.82087	8.385	8.09367	8.91738	8.68296	6.13931	8.42162	8.1002	7.67016	7.66665	7.51252	7.75899	7.61232	7.60381	7.61071
E15 Pancreatic Progenitor	1417301_at	Fzd6	9.2867	9.23206	9.15411	9.46266	10.2695	10.208	10.4218	9.49574	9.81845	9.56374	9.3902	9.57332	9.50783	8.78316	9.94872	9.62966	9.88647	9.52654	9.73075	9.75458	9.4838	9.18242	8.20223	9.19063	9.33922	9.1848	9.02464	9.37884	9.15194	8.92629	9.33405	9.34026	9.22274	9.82528	10.1	9.78336	9.8763	9.29659	9.6909	8.87291	8.87829	8.65551	7.77307	8.55795	8.68458	8.27293
E15 Pancreatic Progenitor	1423241_a_at	Tfdp1	11.6656	11.8809	11.8646	11.8437	12.2234	12.2139	11.9772	11.9516	11.6707	12.2349	10.0839	10.2667	10.1041	9.16791	11.8699	11.7637	11.6254	11.3894	11.284	11.6131	11.6405	9.14165	9.24975	10.0049	10.5844	10.5979	11.8484	11.8499	12.046	11.7072	11.648	11.6591	11.6521	10.7941	11.5491	11.485	11.5362	11.6102	11.5197	10.4698	10.1893	9.98061	9.62831	9.89716	10.297	9.93723
E15 Pancreatic Progenitor	1452887_at	Traf3ip1	9.65288	9.92894	9.97981	10.2401	10.4579	10.1931	10.2807	10.2697	9.90936	10.6435	8.63285	8.7533	8.56709	8.29311	10.1488	9.88119	9.54282	9.25896	9.4238	9.85843	9.49053	9.11115	7.39045	8.87011	9.39944	9.87857	9.93092	10.2922	10.2596	9.99865	9.90308	9.30526	9.3818	8.9203	9.4795	9.7228	8.12718	9.6058	9.66689	8.38837	8.16065	7.6994	8.25036	8.57051	8.42109	8.07299
E15 Pancreatic Progenitor	1456131_x_at	Dag1	8.42885	8.28805	8.87208	9.06941	10.5065	10.3267	10.6849	10.4318	10.1493	10.9615	8.78739	9.06899	8.93668	8.58041	9.83374	9.58586	8.84959	9.29246	8.42559	9.08514	9.54888	7.21831	6.62969	7.26129	7.35697	8.13155	9.5505	9.71392	9.94754	9.7289	8.4987	8.55643	8.54004	9.7868	10.2438	10.3013	10.1531	10.0285	10.1706	9.73877	9.56648	8.84156	9.02579	9.31459	8.89796	8.66709
E15 Pancreatic Progenitor	1443251_at	Prdm16	8.02789	7.96283	7.79822	7.99999	8.08401	8.06871	8.31835	8.30682	7.79299	8.13149	7.39591	7.42074	7.43279	7.14301	7.82762	8.24566	7.41516	5.75548	6.1471	6.28631	6.67722	6.10443	6.45637	5.88463	6.6138	6.50706	7.40216	7.29981	7.61341	8.09831	7.23904	6.8344	7.06298	7.00944	6.34307	6.91625	6.92905	5.93915	6.11622	6.91769	6.34032	7.24006	6.94955	6.78449	6.57881	6.61884
E15 Pancreatic Progenitor	1434700_at	G2e3	9.03897	8.42481	9.24536	9.05218	9.55939	9.46311	9.21301	9.37713	8.98337	10.2768	8.67876	8.73348	8.34198	7.82303	9.153	9.21545	8.52586	8.08714	7.62134	7.74847	8.23775	5.78621	4.93285	7.50908	8.22657	7.8396	8.19656	8.74666	8.86291	7.85246	6.8715	7.69487	7.74319	8.05546	7.86157	8.22733	5.87669	8.24945	8.36624	8.08431	7.67286	6.90528	7.41475	7.94885	7.47404	7.82448
E15 Pancreatic Progenitor	1454161_s_at	0610007P14Rik	10.5987	10.575	10.8588	10.5779	11.5454	11.5834	11.3338	11.2481	11.0327	11.4371	9.61299	9.91067	9.59215	9.54064	10.6018	10.4112	10.4471	10.6772	10.5351	10.7318	10.7888	9.9811	9.23939	10.1049	10.406	10.2948	10.5268	10.603	10.6635	10.7066	10.4833	10.285	10.3829	10.1247	10.5447	10.6615	8.16054	10.0903	10.3133	9.88743	9.79074	9.81312	10.0208	9.84527	9.62141	10.1115
E15 Pancreatic Progenitor	1426565_at	Igf1r	8.98492	8.9034	8.72889	8.82344	9.21755	9.07027	9.35709	8.05579	7.99473	7.85148	8.40801	8.32502	8.70081	9.21653	8.14422	8.14793	8.20868	7.60803	7.07738	7.20497	7.89263	7.14555	6.7757	6.84277	6.47776	7.05304	7.99983	7.52276	7.56828	7.59123	7.78104	7.9494	7.94085	8.41532	8.2177	8.09009	9.06162	8.25638	8.43273	8.57604	8.71326	8.73269	7.82243	8.04464	7.95921	8.11039
E15 Pancreatic Progenitor	1434923_at	Cox19	10.9637	10.2698	10.8638	10.8412	10.8682	10.7829	11.0613	10.4356	10.6661	10.475	9.04347	9.52348	9.32049	9.32483	10.4359	10.6049	10.8661	8.92877	9.1312	8.44163	8.8969	9.02111	9.36372	8.22293	9.02717	8.64287	9.97717	10.4224	10.0428	10.4035	10.0754	9.90498	9.94027	9.79808	9.92924	9.8681	10.2926	9.43233	9.66007	9.37914	9.68582	9.74245	10.0366	9.85298	9.72019	9.92862
E15 Pancreatic Progenitor	1456626_a_at	Sarnp	9.96537	10.3254	10.3371	10.3743	10.3338	10.3824	10.6492	9.87333	10.2103	10.5784	8.61278	8.61588	8.64378	8.36692	9.9419	9.84928	10.2492	9.36312	9.53023	9.64034	9.14622	9.35649	7.48252	8.35528	8.2878	8.63449	10.4974	9.92565	10.2364	10.1257	9.43625	9.8077	9.8328	9.60806	9.99107	9.95259	9.84382	9.40879	9.43996	8.0985	7.77593	8.00306	7.35009	7.89099	7.38824	7.95401
E15 Pancreatic Progenitor	1448499_a_at	Ephx2	8.95718	8.91842	8.88209	8.86733	9.65389	9.49416	9.81813	8.90748	9.01323	8.68894	9.1202	9.34628	9.1249	9.44309	8.22814	8.249	8.70689	8.81932	9.2096	8.91247	8.42934	7.86242	8.59743	8.27642	7.63569	8.05745	8.48236	8.51605	8.65589	8.76846	8.06145	8.03789	8.10168	7.32262	7.3738	7.7617	8.79039	8.14412	8.65173	6.86047	6.60609	7.02402	7.90859	8.03113	7.3246	7.87016
E15 Pancreatic Progenitor	1457121_at	Obsl1	8.08611	8.05451	7.83811	7.87577	8.61742	8.31017	8.45001	7.92254	8.19761	7.63978	5.40311	6.297	6.06622	5.61897	7.55549	7.41125	7.38014	8.20455	7.4036	7.35148	7.86262	8.10185	7.25472	6.80512	6.87974	7.26568	7.53582	7.53105	7.41596	7.70544	8.86264	7.55073	8.18492	8.2733	8.36806	8.65308	7.40935	6.34219	6.4421	6.82656	6.77441	7.36217	6.65454	6.62556	6.82248	7.06668
E15 Pancreatic Progenitor	1424028_at	Chtf8	10.3953	10.4243	9.83965	9.91909	10.7901	10.6464	10.5367	9.74476	9.81291	9.61666	9.26804	9.43603	9.38672	9.40156	10.2073	9.93711	9.45017	10.2511	10.0019	9.92913	10.2472	9.62179	9.22621	9.34904	9.37685	9.12818	9.22872	9.49937	9.40963	9.68341	9.31418	9.40035	9.12987	9.47597	9.34524	9.27526	7.87303	8.81148	9.20047	9.20752	9.10282	9.22633	9.27532	9.31814	8.97085	8.8659
E15 Pancreatic Progenitor	AFFX-TransRecMur/X57349_M_at	Tfrc	8.25151	8.02137	8.53289	8.26554	8.7852	8.55921	8.4823	8.79885	9.47218	9.20949	7.75953	7.33116	7.45588	7.18279	7.26997	7.09018	7.11484	7.17578	7.19993	7.39051	7.03141	6.36158	6.27591	7.24362	7.21622	7.24565	6.83796	7.30667	7.09705	6.69828	6.70222	7.23612	6.90138	6.45456	6.83471	6.81674	8.73673	7.27495	7.4392	7.98912	7.96719	8.16446	7.26637	7.0958	7.35861	8.0126
E15 Pancreatic Progenitor	1452715_at	Haus5	9.46361	9.48837	9.34788	9.53556	9.65746	9.48451	9.77479	9.47192	10.2246	9.42898	7.85592	8.29965	7.24515	7.97223	8.44349	8.54418	8.7923	7.70374	7.81382	7.77091	7.58883	8.78152	8.5869	8.72363	7.99387	7.96324	8.40266	8.33403	7.74878	8.24846	8.73282	8.76515	9.22063	8.88255	8.56216	8.72888	9.00583	8.39517	8.69312	8.20022	8.42093	8.95937	8.24521	8.14514	8.17109	8.1892
E15 Pancreatic Progenitor	1418669_at	Hspg2	8.02171	7.87301	7.94229	8.06296	8.6976	8.68688	8.99083	8.13573	8.58128	8.14652	8.60597	8.38277	8.77651	8.34637	7.02063	7.07622	7.38761	8.18104	7.74504	7.51414	8.04187	7.21433	6.99963	6.74421	6.37561	6.88644	6.77641	6.49286	6.4245	7.08619	9.53731	8.27578	8.97247	9.39482	10.0254	9.70451	7.60584	7.01705	6.66309	6.84526	6.59417	6.53072	6.81967	6.9543	6.93361	6.51177
E15 Pancreatic Progenitor	1428023_at	3110009E18Rik	9.00079	9.06611	9.25736	9.19349	9.64602	9.39491	9.35609	10.1218	9.92433	9.55124	7.61572	7.91843	7.6309	7.5768	8.46215	8.20009	8.55518	8.45533	7.94672	7.97268	8.00155	7.74059	6.3286	6.81661	7.32452	7.00978	9.20338	8.89073	9.12557	8.62298	8.55762	9.01342	9.15739	8.41825	8.45845	8.88111	9.56069	9.11202	8.70941	8.26506	8.2178	8.19945	8.0208	7.94335	7.41523	8.28974
E15 Pancreatic Progenitor	1448352_at	Luzp1	10.5445	10.3393	10.4209	10.5466	10.7164	10.5621	10.8808	10.1395	10.3494	10.336	10.1667	10.2075	10.3344	10.1282	10.3002	10.227	10.4633	9.12358	8.73543	8.70361	8.62422	8.62006	8.48994	8.14144	8.16608	8.76761	9.84021	9.91691	9.75087	9.92109	9.75437	9.53129	9.94771	10.3614	10.5627	10.3555	9.92471	8.89748	9.05149	9.14416	8.9907	9.00023	9.21407	9.21648	9.13841	9.02652
E15 Pancreatic Progenitor	1426460_a_at	Ugp2	7.19817	7.54055	7.57586	7.79382	7.98337	7.83757	8.2	7.07406	7.4954	7.98345	6.74298	7.56561	7.47612	6.96857	7.06511	6.20441	7.54198	6.66226	7.38794	7.23494	7.51031	4.60637	4.46429	5.19094	7.35051	5.53684	7.91653	7.0357	7.40412	7.47541	7.48886	7.33028	7.64045	7.06131	7.92386	7.70618	6.56099	7.16552	7.28357	5.64868	5.01515	5.46637	6.17779	5.62016	6.2276	5.26417
E15 Pancreatic Progenitor	1455551_at	Uevld	7.45897	7.8065	7.8911	8.01243	8.555	8.51248	8.8286	8.18589	7.98786	8.54321	7.53462	7.62615	7.23829	6.63824	7.76542	7.94066	7.7208	7.25228	7.56257	7.67156	7.42717	6.4809	6.75257	6.70952	7.04991	7.54255	7.94943	7.76101	7.67165	7.42433	7.43935	8.00713	7.72248	6.63955	7.61731	7.67842	5.59516	7.35841	7.54044	6.24001	6.24468	6.3141	6.0731	6.34185	6.29915	6.78155
E15 Pancreatic Progenitor	1416424_at	Plin3	8.56763	8.33408	8.24604	8.45019	9.22569	8.96551	8.95559	9.00448	8.5514	8.75868	8.22678	8.33749	8.46084	8.2956	7.52468	7.63598	7.74962	7.55759	7.28148	7.53173	7.61318	7.331	7.4763	7.11261	7.14315	7.58644	8.03317	8.35226	8.3829	8.49174	8.24838	7.98326	9.01705	8.08847	8.43813	8.48837	8.01892	7.536	7.70708	7.06443	6.83431	6.99438	7.50409	6.90697	7.13021	7.07894
E15 Pancreatic Progenitor	1416705_at	1110028C15Rik	9.37575	9.70293	10.1262	9.97275	10.3125	10.3001	10.6172	10.7565	10.2795	10.8721	7.9977	8.36033	7.96186	7.58921	9.8945	9.78531	9.87607	9.1221	9.47656	9.2176	9.32708	8.64102	7.96932	9.10482	8.17273	9.03357	10.2393	9.86519	10.089	10.022	9.34596	9.36449	9.22274	9.07285	9.4896	9.52124	9.51834	9.65817	9.53336	8.63361	8.32365	8.14533	8.22443	8.41422	8.08804	8.70963
E15 Pancreatic Progenitor	1434689_at	Zfp637	10.3178	10.1876	9.91279	10.0201	10.7312	10.5567	10.9298	9.43229	9.63596	9.25639	7.81243	7.9124	7.71917	7.89499	9.57126	9.77395	10.0536	8.73313	8.29991	8.02231	8.15972	9.06306	8.97341	8.84375	8.94131	8.51658	9.04207	9.43945	9.33465	9.35723	9.60371	9.43396	9.73558	9.40978	9.3519	9.21733	10.2276	8.83926	9.43291	8.93406	9.3553	9.33248	9.25554	9.16095	8.98479	8.96779
E15 Pancreatic Progenitor	1460170_at	Ext2	8.7593	8.67768	8.73061	8.76725	9.26332	9.17465	9.47412	9.10925	9.20642	8.96711	7.62445	8.10566	7.92786	7.84182	8.6427	8.77249	8.76135	7.88055	7.38644	7.89126	7.28136	7.54992	7.27688	7.22045	7.13741	7.08244	8.83628	8.5779	8.46564	9.1357	8.55947	8.29559	8.60265	9.3775	9.38514	9.23005	6.96656	7.81838	8.20586	8.24746	8.40363	8.30686	8.30759	8.48805	7.95809	7.42538
E15 Pancreatic Progenitor	1434521_at	Rfx7	10.8604	11.1151	11.172	11.1952	11.7058	11.4654	11.4242	10.8202	11.0535	11.2711	10.2434	10.0177	10.0954	9.29792	11.3379	11.2071	10.942	10.5141	10.8214	10.94	10.6934	9.73816	9.6888	10.3987	10.523	10.5113	11.1736	11.122	11.3905	11.1382	10.3971	10.6698	11.3619	10.5202	10.7761	10.6912	9.43624	11.0195	10.7482	9.97551	9.39281	9.1263	9.32348	9.77876	9.73327	9.72206
E15 Pancreatic Progenitor	1429127_at	Nradd	8.06275	8.0845	7.95703	8.10126	8.45937	8.19178	8.47532	8.20898	8.2347	7.87969	7.43997	7.41621	7.32742	7.20091	7.67548	7.8136	7.57153	6.78741	6.13934	6.48704	6.34907	7.44688	7.07661	6.83772	7.02095	7.25734	7.43507	6.89361	7.07231	7.1599	7.10452	6.91983	7.38107	7.3178	7.87365	7.49624	7.57358	5.97146	6.62598	6.64587	6.47871	6.42495	6.48029	6.6898	6.27865	6.53834
E15 Pancreatic Progenitor	1452611_at	Rnf160	7.8287	8.30089	8.10946	8.29207	8.36997	8.51135	8.73118	8.72595	8.39017	9.06006	6.48535	6.75013	6.85456	5.94242	8.17748	7.76753	8.25874	7.36588	7.14877	7.92272	7.64403	6.70263	6.54925	6.95068	6.88145	6.99486	8.52634	8.20384	8.30659	8.29302	7.18542	7.99606	7.87452	7.02718	7.74853	7.57068	7.72281	7.76629	7.79863	6.76121	6.31832	6.20693	6.19972	6.26508	6.71578	6.76419
E15 Pancreatic Progenitor	1437248_at	2700049A03Rik	10.378	9.81723	10.4975	10.5785	10.859	10.4837	10.6876	9.34095	9.40628	9.71928	8.54363	8.95281	8.77815	9.03695	10.3653	10.2902	9.34014	9.01333	8.99214	9.35612	9.42252	7.71176	7.37374	8.74014	8.85771	9.46516	10.2729	10.2151	10.0265	9.89643	8.75278	9.42985	9.11311	9.06379	9.16164	9.58026	9.85216	9.31169	9.25754	9.55675	9.81854	9.4738	8.73887	9.51528	8.80335	8.88501
E15 Pancreatic Progenitor	1419464_at	Wdr86	7.27461	7.55999	7.15803	7.02304	7.81907	8.09809	7.89374	7.95872	7.69122	7.83576	5.97029	6.64023	6.54688	6.97903	6.61133	6.53309	6.77394	6.98767	6.43899	6.60963	6.6605	7.36895	7.1648	6.24566	6.88455	6.65321	6.59059	6.38831	6.31317	6.53241	7.52458	7.01703	6.89887	6.7673	6.88285	7.05627	6.72095	6.11684	6.25113	6.63762	6.87533	7.00568	7.4087	7.67521	7.89426	7.77341
E15 Pancreatic Progenitor	1448906_at	Cdh16	6.06454	5.87932	5.67948	5.98276	8.44075	8.25589	8.71468	7.61839	8.51279	7.82018	7.17828	7.1919	8.54814	7.36804	7.32072	7.27735	7.98446	6.61944	6.43516	6.2907	6.18446	6.83633	6.8561	6.78033	6.60886	6.92978	6.42025	5.94205	6.22509	6.34828	6.28793	5.63336	6.19159	6.63444	6.59367	6.57585	7.44421	5.49312	5.93977	6.35407	6.36924	6.3301	6.31036	6.20682	6.50164	6.17131
E15 Pancreatic Progenitor	1423049_a_at	Tpm1	9.66711	9.82748	9.54428	9.79441	10.7002	10.4103	10.8957	9.1018	8.99104	8.99432	9.62483	9.8917	9.91807	9.50647	9.42866	9.38806	9.90346	9.5013	8.58075	9.07508	8.88035	8.15502	7.47257	8.13465	8.11972	7.94737	9.29456	9.29745	9.16265	9.28767	11.1273	9.65035	10.1314	10.8854	11.1443	10.5386	9.65986	10.2653	9.14617	8.07156	8.06232	8.20061	7.92283	8.0899	8.21517	7.20675
E15 Pancreatic Progenitor	1416818_at	Parva	9.89313	9.80482	9.50014	9.72416	9.86808	9.81488	10.1741	9.29476	9.76582	9.40027	9.15263	9.65183	9.20581	8.94854	9.08316	9.11538	9.66656	8.08407	7.58706	7.02918	7.18997	8.32238	8.44633	7.94213	7.7458	7.07231	8.73325	8.69396	8.6011	8.82273	9.54096	8.95255	9.20872	8.9548	9.14363	9.16794	7.85018	8.24742	8.79637	8.17832	8.34625	9.04997	8.86352	8.6225	8.57573	8.59621
E15 Pancreatic Progenitor	1419378_a_at	Fxyd2	8.00168	7.89076	8.03678	8.12637	8.91569	8.48429	9.00867	6.62919	6.54691	6.46585	9.85633	8.28752	8.20902	8.74796	7.68081	7.5819	8.17656	7.04084	6.82662	6.84826	6.50877	6.06809	6.11406	6.11587	6.08572	5.70026	6.89815	6.80818	6.7761	6.62525	6.54825	6.62175	7.91191	6.93247	7.11643	7.45837	7.24824	7.13019	5.9534	5.63933	4.81112	5.53923	6.73558	6.19292	7.06472	6.10372
E15 Pancreatic Progenitor	1424921_at	Bst2	7.61605	7.21041	7.13776	7.37284	9.30162	9.6084	9.7628	9.61747	8.66766	9.5867	9.38894	9.00412	7.97004	8.28205	7.114	7.48331	7.99036	7.95139	8.21585	7.37659	8.45575	7.53176	7.70301	7.53214	7.01491	7.57492	7.14188	7.36833	7.16496	7.65449	9.68886	8.00422	9.14026	9.53129	9.31797	9.49857	8.22626	8.4935	7.65628	7.20718	7.17773	7.40637	8.5825	8.13093	7.74765	7.9572
E15 Pancreatic Progenitor	1455737_at	Ppm1h	10.697	10.877	10.5132	10.7616	11.7929	11.4854	11.7339	11.5183	11.0771	11.0476	10.4952	10.498	10.457	10.4857	11.3788	11.2514	11.1267	10.6519	10.189	10.8599	10.9141	10.6874	11.3841	10.2222	10.5512	10.4079	10.7111	10.8207	11.094	10.4113	9.46985	10.3623	9.54566	9.80435	9.73559	9.85823	8.91958	11.4875	11.3139	10.5593	10.601	10.7493	11.0634	11.1642	11.0859	11.4818
E15 Pancreatic Progenitor	1453135_at	Fndc5	8.33173	8.20631	8.16808	8.32333	8.97673	8.62911	8.71357	6.66012	6.45618	6.71333	6.48558	6.46628	6.81677	6.63605	8.03098	8.18013	8.45488	7.32767	7.22375	7.25654	7.30196	6.89674	7.17177	7.76662	7.41384	7.32482	7.42069	7.65505	7.47009	7.61199	7.82936	7.39025	7.33856	7.70881	7.57804	7.49013	8.79313	7.03549	7.13478	7.31964	7.74573	7.65066	7.19369	7.31631	7.25942	7.22063
E15 Pancreatic Progenitor	1435776_at	2310009B15Rik	8.83274	8.65603	8.52176	8.68909	9.40191	9.34704	9.11171	8.98773	8.9227	8.72666	7.39398	7.70782	7.55216	7.65311	8.52588	8.4094	8.71976	7.89826	8.62182	8.16195	8.40347	8.03408	7.85404	8.15717	7.82021	7.78898	8.40371	8.76014	8.62622	8.69675	8.32617	8.01488	8.23852	8.63039	8.78943	8.53097	8.47637	7.7141	8.09947	7.81894	7.7006	7.50776	7.29711	7.88786	7.47095	7.38797
E15 Pancreatic Progenitor	1422293_a_at	Kctd1	9.18657	9.15992	9.06334	9.13448	9.81657	9.55922	9.9594	8.9651	9.27935	8.95805	9.4469	9.35491	9.13398	9.05771	8.98449	8.77264	9.06248	7.74039	7.73045	7.26438	7.27159	8.53902	7.30441	7.07163	7.20309	6.44987	8.7326	8.81284	8.90742	8.97806	7.64431	8.34549	8.5966	8.64574	8.53801	8.49844	9.71734	8.17182	8.42963	8.89481	8.96261	8.96691	9.53441	9.28994	8.80925	8.81423
E15 Pancreatic Progenitor	1426749_at	Prmt3	11.6703	11.6179	11.5261	11.5811	11.8254	11.7979	11.5425	11.1646	11.4167	11.3957	10.5272	10.7295	10.569	10.4878	10.6228	10.5119	10.6388	11.2056	10.8028	10.9373	11.1457	10.3559	10.506	10.5462	10.5201	10.6034	10.2786	10.6304	10.4868	10.2896	10.9122	10.1798	9.786	9.91967	10.035	10.0399	10.2372	10.2269	10.1055	10.102	10.3418	10.563	10.7007	10.5358	10.6231	10.5835
E15 Pancreatic Progenitor	1451319_at	Senp1	7.68826	7.30368	7.77042	7.69568	8.3175	7.95333	8.32186	7.98195	8.24342	8.52808	6.1486	6.36606	6.13332	6.2082	7.79267	7.66473	6.9153	6.35987	6.17823	6.02321	6.03093	5.46378	5.88451	5.83517	5.85206	6.14414	7.32512	7.74097	7.47082	7.57777	6.80078	6.58046	6.77623	7.72585	7.50836	7.56534	7.60364	6.58427	6.81241	7.39559	7.34781	7.61965	7.26404	7.13452	7.13241	6.54439
E15 Pancreatic Progenitor	1418793_at	Idua	9.61736	9.88151	9.86368	9.85407	9.9595	9.89599	10.2561	9.98384	10.0938	9.70388	9.37047	9.73713	9.63892	10.2086	8.77248	8.87993	9.02612	8.44099	8.28979	8.20431	8.34155	10.1225	10.1276	9.39314	9.56409	9.29027	8.26219	8.07735	8.33068	8.06609	7.83521	7.95303	8.37945	8.74551	8.57785	8.57336	8.3354	8.01801	8.3646	8.51908	8.58438	8.80843	9.28279	9.01654	8.95964	9.02854
E15 Pancreatic Progenitor	1434805_at	Mllt1	8.12956	8.25215	8.01902	8.26818	8.90155	8.66466	8.98514	8.99383	8.57809	8.49701	7.58672	7.86856	7.77766	7.9768	7.81962	8.09547	8.23027	7.57304	8.10146	7.24814	7.42029	7.29768	7.39388	6.67907	6.92198	7.16355	7.68803	7.41662	7.8045	7.77756	7.49308	6.75843	7.41096	7.65159	8.03504	7.86261	7.04376	7.21184	7.50659	7.40387	7.55557	7.76234	7.37514	7.3299	7.79967	7.50399
E15 Pancreatic Progenitor	1450955_s_at	Sort1	8.49571	8.52984	8.26872	8.35851	9.61998	9.51898	9.87922	8.84516	8.93124	8.69114	9.24482	9.86911	9.55058	10.1869	8.66656	8.74586	8.9354	9.42333	9.05675	8.89651	8.99371	9.35012	8.72651	9.00632	8.93516	8.69566	7.61074	8.12931	8.09075	7.93687	7.81676	7.97196	7.96157	7.90532	7.92417	7.80876	7.31006	7.75835	7.94059	8.76055	8.65348	9.11211	9.23466	8.87294	8.69335	8.32615
E15 Pancreatic Progenitor	1428174_x_at	Khsrp	9.0091	9.65055	9.5419	9.48914	10.4121	10.3257	9.94486	9.71524	9.93098	10.3609	8.53293	8.00194	8.15978	7.50124	10.4953	10.3609	9.37209	9.33699	8.71926	8.62866	8.37948	6.3253	7.82268	7.32722	8.17395	8.17314	9.57656	10.3586	10.2854	9.81201	8.37125	8.90451	8.62609	8.5028	8.52265	8.53375	8.9895	8.90758	8.92535	9.04855	8.45526	8.65817	8.3144	8.71208	8.37292	8.83539
E15 Pancreatic Progenitor	1445027_at	Cdr2l	8.40079	8.55797	8.52209	8.48135	8.7166	8.39102	8.7581	7.33861	7.46581	7.60438	7.51683	7.54154	7.15669	6.89313	8.71074	8.4613	8.52195	8.17565	7.12031	8.60847	8.77721	7.54424	6.18094	6.40138	7.06121	8.11142	7.85404	7.65847	7.99079	8.126	8.54786	8.41292	8.19701	7.45752	7.86412	7.9782	7.447	7.7423	7.91421	6.52171	6.5735	6.23924	6.2399	6.60451	6.76844	6.3662
E15 Pancreatic Progenitor	1430048_at	7630402I04Rik	7.57856	7.13301	7.33584	7.76978	8.2956	8.63448	8.18359	6.98424	7.70686	8.53768	6.39636	5.63528	5.31497	4.75844	8.34575	8.45449	7.77285	7.33004	7.55476	7.72058	7.49169	6.19858	5.67619	7.12985	6.97463	7.13493	7.90505	7.45262	7.13157	7.02864	7.33995	6.93516	7.40763	7.09235	6.89001	7.57032	6.75355	8.24679	7.72172	7.22644	7.03553	6.32947	6.43549	7.23702	6.37618	6.43122
E15 Pancreatic Progenitor	1456798_at	9330118A15Rik	6.9743	6.87825	7.10626	7.47152	8.89166	8.41986	8.58789	6.81572	6.3383	7.23862	9.53198	9.98551	9.9562	8.50533	7.87141	7.81336	7.62513	7.80295	7.56929	7.66471	8.31702	5.664	5.21639	7.48596	7.61365	7.79682	7.47292	7.67317	7.71858	7.21225	7.56899	7.37568	7.36361	6.92713	7.99296	7.40445	7.98017	6.66899	7.37519	6.84031	6.57476	6.36008	6.27474	7.73838	7.07077	8.3695
E15 Pancreatic Progenitor	1427202_at	4833442J19Rik	8.22656	8.42693	8.35373	8.35899	9.21942	8.87772	8.88134	8.30031	8.35794	7.99545	8.51677	9.23897	9.12967	8.40096	7.72159	7.8638	8.1664	8.57411	7.87085	7.82713	8.08239	7.94076	7.29886	7.72245	7.6543	8.01693	7.23396	7.37259	6.79571	7.09708	8.03567	7.54683	7.53037	7.73311	8.1801	8.44499	6.72437	8.01351	7.22485	7.02647	7.51554	6.54982	7.73547	8.36153	7.04125	7.21788
E15 Pancreatic Progenitor	1454984_at	Lifr	11.0037	10.9085	10.968	11.0381	12.1584	12.2004	12.4721	10.9647	11.2587	11.0772	12.0532	12.1332	11.7521	12.1454	10.007	10.2363	10.2592	11.7017	11.3334	11.4408	11.7053	11.3035	11.2097	11.7549	11.4484	11.4519	10.6667	10.6198	10.891	10.4984	11.6859	10.9369	10.7246	11.8293	11.8271	11.8654	11.0585	11.2958	11.4059	11.413	11.3122	10.9656	11.3942	11.7988	11.6619	11.7551
E15 Pancreatic Progenitor	1448052_at	Cgnl1	8.20501	7.91828	7.87557	8.08171	9.29539	9.01711	9.49815	8.6456	8.5139	8.68285	8.16958	8.71668	8.71455	9.151	8.17278	8.15313	8.02985	7.13474	6.39991	7.00362	7.28591	7.30089	7.11374	7.30837	7.2811	7.44886	7.35949	7.3067	7.06086	7.10736	7.25678	6.96955	7.05571	7.98647	8.53916	8.21253	8.72708	7.14847	6.848	7.41272	7.35685	6.90098	7.78182	7.44285	7.66039	7.0954
E15 Pancreatic Progenitor	1453988_a_at	Ide	9.16883	8.92822	9.76175	9.93827	10.2243	10.1911	9.78033	9.36595	9.45854	10.5534	7.85308	8.35676	8.33382	7.45208	8.83683	8.81708	8.66711	9.31041	8.8845	8.74499	9.5033	7.67116	5.32446	8.24454	8.87358	9.4472	9.21215	9.16306	9.26913	9.21595	8.47214	8.49775	7.96956	7.72849	8.48599	8.69202	9.54443	9.76345	9.80148	9.16262	9.50662	8.55753	8.41386	9.49144	8.64449	8.38882
E15 Pancreatic Progenitor	1454656_at	Spata13	10.0941	10.3293	10.2867	10.3491	11.4991	11.2038	11.695	10.5582	10.3172	10.267	10.7952	10.7679	11.0486	10.577	10.49	10.5035	10.4686	10.348	10.3416	10.4863	10.4784	8.70796	8.43448	9.28456	9.54437	9.60015	10.9556	10.8753	10.7463	10.5813	10.1118	10.6906	10.29	10.5405	10.8506	10.5343	8.54536	10.3532	9.71052	9.11609	8.98212	8.74703	9.10636	9.39046	9.18865	8.96063
E15 Pancreatic Progenitor	1442298_at	Bicc1	7.17488	6.90704	7.18648	7.40385	9.4153	8.88975	9.2327	6.68026	6.7389	6.68407	8.64042	8.05591	9.29058	8.8237	7.05488	7.12352	6.79266	6.90527	7.51906	7.67887	7.57292	8.34657	8.55748	8.32393	8.58539	8.17102	5.652	6.42878	6.84795	7.2093	7.45186	7.19354	7.86085	8.03741	6.81369	7.65984	8.13334	7.03774	7.2018	7.91237	8.52115	8.00915	8.69384	7.88373	8.18103	7.99145
E15 Pancreatic Progenitor	1429625_at	2900054C01Rik	7.99637	8.0357	8.10686	8.23968	9.38508	9.23436	9.78293	8.43657	8.37371	8.69403	8.89227	8.93966	8.49405	8.00267	8.07004	7.95578	8.38527	7.21422	7.09844	7.37884	7.83907	7.18831	6.42901	7.96466	7.24964	7.40821	7.80928	7.80304	8.03745	7.44628	6.79444	7.59284	7.03295	6.73082	7.21223	7.11322	5.03769	6.98404	7.80855	7.13958	7.26679	7.03881	7.28802	7.57382	7.60637	7.805
E15 Pancreatic Progenitor	1441677_at	Smc4	8.07206	7.25549	7.72437	7.71246	8.80994	8.58389	8.2497	8.06841	8.55244	9.27502	7.71428	6.97568	6.8532	5.74551	7.35785	7.31027	6.27658	6.78599	6.97657	7.07285	7.0504	5.46864	4.68289	6.67711	6.76018	7.00203	6.96379	6.9676	6.81601	6.47394	6.15471	6.14721	6.61054	6.86054	6.90806	7.19959	6.33162	8.0949	7.05601	7.35288	7.04697	7.34598	6.40423	6.59148	7.14513	7.18382
E15 Pancreatic Progenitor	1452081_a_at	9130017N09Rik	9.44388	9.36741	8.9948	9.45832	10.1008	9.84107	10.2727	9.1379	8.65901	8.59886	8.56407	9.01	8.95074	9.00437	8.85212	8.9529	9.56672	7.45912	7.79698	7.8841	8.09114	8.3217	8.02456	8.41791	8.48799	8.157	8.643	9.04699	8.77849	8.78733	7.80672	8.39769	8.40337	8.15407	8.36384	8.22831	8.97298	7.62464	8.81172	8.24643	8.53739	8.69277	8.68236	8.45085	8.65783	8.51947
E15 Pancreatic Progenitor	1422172_x_at	2810408B13Rik	7.89558	8.23419	8.52613	8.36465	8.74589	8.3839	8.75966	8.92044	8.3691	8.59575	6.29176	7.17299	6.85521	6.73295	7.45817	7.86326	8.30254	7.49619	7.63808	7.65287	7.62489	8.06151	7.9011	6.77778	6.90507	7.37397	7.86024	7.1565	7.28662	7.20872	7.0336	7.35047	7.08659	7.51063	7.49186	7.66148	7.26228	7.55387	7.77518	7.17941	7.02907	6.62558	6.84801	6.80138	6.79436	7.20585
E15 Pancreatic Progenitor	1420650_at	Zfhx3	8.7258	8.85553	9.12834	9.10576	9.84995	9.52958	10.097	9.70273	9.17517	9.47466	9.23877	9.56879	9.59393	9.17573	8.38135	8.95718	9.01031	8.45062	7.88943	8.55012	8.27712	6.26174	6.51734	6.57565	7.31542	7.74745	9.14642	9.20015	9.26988	8.7885	8.16452	8.67788	9.15369	8.66706	9.07758	8.80205	9.40398	8.15936	8.20719	7.4868	7.38108	7.5002	7.80286	8.08775	7.36582	7.45556
E15 Pancreatic Progenitor	1451888_a_at	Odz4	9.38037	8.80172	8.99853	9.01176	9.64841	9.48425	10.0002	9.24194	9.0222	8.99118	8.50465	8.70503	8.52143	8.03362	8.86277	8.75191	8.84426	8.06263	7.17944	7.36247	7.99297	8.17567	6.95948	7.35131	6.74218	6.92914	9.38631	9.27817	8.79424	9.24399	9.17491	8.82519	8.57426	9.30331	9.29244	9.52132	7.89843	6.83097	7.4738	7.47952	7.73098	8.24266	8.69682	8.7661	8.56748	8.67428
E15 Acinar	1426376_at	Reep5	10.3699	10.2517	10.2816	10.4891	11.5033	12.2091	10.8474	12.8324	12.8677	12.8578	10.9355	10.8787	11.1022	11.3774	9.92495	10.012	10.9467	11.0295	10.7885	10.8953	10.9991	10.859	11.1753	11.1142	11.0744	10.9385	10.5775	10.168	10.8129	10.7138	10.7614	10.8003	10.544	10.8029	10.8797	10.8143	10.9414	11.3366	11.4624	11.0165	10.8346	10.8965	11.2658	11.7147	11.5	10.984
E15 Acinar	1423178_at	Abi1	8.76175	8.30149	8.1444	8.37568	8.72249	8.92002	8.79305	9.88344	9.89007	9.86816	8.06635	8.28661	8.37841	8.22771	7.98888	7.93726	8.17101	8.24909	8.32768	8.62267	8.3244	7.87899	8.49655	8.17544	8.4106	8.00227	8.40324	8.19114	8.26285	8.09987	7.40536	7.95823	7.80639	8.17291	8.43707	8.05013	7.4966	7.41437	7.66395	8.02531	7.53796	7.44991	7.84344	7.39464	7.38749	7.87962
E15 Acinar	1451512_s_at	Hibch	9.67263	9.53465	9.6913	9.67956	9.95452	10.2176	10.1882	11.088	11.1102	11.1128	8.91102	9.22476	9.00009	9.05365	9.83859	9.71626	9.94453	9.47198	9.32769	9.59791	9.68269	9.64311	9.26861	9.4219	9.30199	9.1859	9.87215	9.50683	9.79898	9.7186	9.2599	9.6109	9.69701	9.4228	9.49366	9.43337	10.5192	9.96706	10.1593	9.27966	9.17571	9.26207	8.96487	9.0853	9.37962	9.55965
E15 Acinar	1440162_x_at	A630043P06	5.84788	5.76609	5.79795	5.68651	8.89472	9.8895	7.56878	11.4805	11.3228	11.4055	5.57698	5.99899	6.40743	6.79376	6.21347	6.698	7.78659	7.48051	6.35509	6.58454	7.44805	6.34073	6.9951	6.40392	5.64567	6.85897	8.00637	8.51898	8.3201	8.41544	6.9309	7.7953	7.16614	7.6346	7.53715	7.23202	7.18027	7.51163	8.10676	7.68611	7.56306	7.08014	6.9616	6.67296	7.14196	7.6394
E15 Acinar	1424160_at	Alg5	9.45714	9.53598	9.39259	9.5598	9.74916	10.1575	9.78062	10.737	10.7662	10.7924	9.01657	9.0557	9.0684	9.35629	8.83372	8.82226	9.39712	8.8742	8.69767	8.95889	9.11228	8.57502	9.20971	9.33784	9.08644	9.16971	9.0955	8.85854	8.92479	9.23917	9.52615	9.19246	9.36169	9.75986	9.92238	9.56911	9.98984	9.69839	9.93107	9.56113	9.55825	9.69034	9.73024	9.7304	9.53337	9.73863
E15 Acinar	1435967_s_at	Hibadh	9.91146	9.78264	10.2631	10.2454	10.1021	10.2802	10.4601	11.0113	11.0398	10.9854	9.16351	9.77239	9.67957	9.35913	9.60346	9.74958	9.84054	9.64885	9.71381	9.67265	9.42532	10.0287	10.3844	9.84555	10.1012	10.2176	10.0947	9.633	9.90674	9.91715	9.51848	9.67237	9.53677	9.99457	9.8321	9.96727	8.94832	10.0818	10.2964	9.72533	9.47749	9.78776	9.82614	9.80539	9.48452	9.53103
E15 Acinar	1424065_at	Edem1	10.0615	10.2404	10.161	10.0328	11.3079	12.0635	10.589	12.9884	13.0279	13.0403	10.7475	10.6176	10.998	11.3039	9.28236	9.31899	10.0624	9.71018	9.07558	9.13567	9.90368	8.64356	9.81684	8.92098	8.85729	8.01684	10.3109	10.058	10.6419	10.2239	10.8955	10.5616	10.5712	10.5723	10.1821	10.4671	10.7295	10.3779	10.5957	11.0285	10.3813	11.2126	11.1832	11.2751	11.0883	11.2986
E15 Acinar	1449086_at	Rnf141	9.36818	9.50475	9.75761	9.70279	10.135	10.4098	9.66925	11.0821	11.1251	11.118	8.90057	9.22269	8.97677	8.44198	10.5703	10.4424	10.2972	9.50462	8.96723	9.02643	9.34501	8.90971	9.88052	9.66244	10.2979	9.51707	9.63748	9.59904	9.98632	9.6332	8.96265	9.33013	9.70878	8.47283	8.75485	9.28771	8.68844	9.50053	9.65495	9.49091	8.8585	9.12659	9.22702	9.13082	9.0316	8.8988
E15 Acinar	1455544_at	Zranb3	9.75092	9.58334	9.37159	9.54588	9.58067	9.52186	9.87323	10.446	10.4776	10.4325	8.10809	8.75684	8.26503	8.45507	8.26102	8.68438	8.4653	9.13248	9.40186	9.45564	9.3036	7.99571	8.85367	8.77584	8.5987	8.37367	8.87946	8.65189	8.83315	8.68117	8.68507	8.75185	8.97234	8.4049	8.23139	8.50304	8.9469	8.2905	8.4264	8.23363	8.29861	8.63313	8.21644	8.17386	8.31618	7.44876
E15 Acinar	1452861_at	2010300C02Rik	9.13076	9.32745	9.44607	9.48441	10.1503	10.6383	10.0917	11.3245	11.2797	11.1986	9.16069	9.50911	9.52013	9.54941	8.83245	8.76533	9.15266	7.79382	8.04509	7.41494	7.71914	8.85597	8.95968	8.10728	8.17291	8.21278	9.05142	8.93298	9.07853	8.71155	8.94391	9.07054	8.95029	8.53058	8.67314	8.47506	9.25013	8.08386	8.74456	8.5658	8.53453	8.95993	9.09859	9.12015	8.95394	8.28533
E15 Acinar	1418888_a_at	Sepx1	9.49084	9.73332	10.2107	10.2365	10.6988	11.2877	10.2005	11.9153	11.9525	11.8996	10.4704	10.8876	11.1588	11.5937	9.15845	9.38908	9.86995	9.34763	8.89654	8.70712	9.0847	9.95398	10.1534	9.53517	9.28986	9.05835	9.24622	9.33133	9.39999	9.43779	9.6888	9.45328	9.46453	9.68299	9.83463	9.95324	8.73982	9.95843	9.78597	9.74133	9.72519	10.0154	10.5904	10.2836	10.5377	10.0712
E15 Acinar	1448896_at	Pigf	11.5821	11.4264	11.4337	11.4503	11.6905	12.0457	11.3051	12.4455	12.4598	12.5097	10.7218	11.0073	10.6978	10.4664	11.3312	11.239	11.4533	11.336	11.3308	11.3586	11.3873	10.9269	11.4757	10.7222	10.793	10.9884	11.0246	11.3102	11.265	11.2468	10.1388	10.7662	11.5336	10.2319	10.6143	10.2259	10.653	9.86597	10.5196	10.853	10.7877	10.9152	10.713	10.9452	11.0955	10.7564
E15 Acinar	1451016_at	Ifrd2	8.71545	8.78993	8.68459	8.67808	8.91301	9.35321	8.35632	9.98842	9.9527	9.85829	6.38379	6.89778	6.84782	7.00351	6.81021	6.96191	7.37746	6.29598	6.27898	6.19035	6.29696	7.14812	6.49937	6.80941	6.21272	6.09697	7.37575	7.2413	7.3099	7.20056	7.48209	7.09789	6.97419	7.23867	7.35674	7.4066	8.25298	7.22921	7.19341	7.0505	6.73807	7.16114	6.43489	6.70314	6.55897	6.19249
E15 Acinar	1438699_at	Srd5a1	7.94711	7.91255	7.95363	8.2404	8.49434	8.67428	8.58419	9.81001	9.78629	9.95415	7.50551	7.62178	6.85765	6.5645	6.42549	6.29677	6.78458	6.65351	5.65934	5.68637	6.49971	5.52176	5.60993	5.37501	5.09998	5.74122	6.23783	6.02503	6.4724	6.27225	6.47867	5.36497	5.98292	6.52166	6.67867	6.579	6.40121	5.39902	5.00115	6.08718	5.6431	5.85695	6.18582	5.74624	5.88891	5.52799
E15 Acinar	1449022_at	Nes	7.00262	7.04522	6.56666	6.75868	7.33681	7.89141	7.48826	9.01334	9.00072	8.89138	6.03386	5.97691	6.43267	6.67925	5.53281	6.09073	6.20253	8.02056	6.409	6.35076	7.17446	6.29154	6.32471	5.92079	5.9831	5.88312	6.16356	6.10458	6.23947	6.14027	7.33473	6.56656	7.11364	7.94997	8.25892	7.3769	6.98817	5.64554	5.9511	6.02949	6.4797	6.40179	6.43106	6.0706	6.22294	6.00626
E15 Acinar	1428667_at	Maoa	8.64764	8.86612	8.99337	9.08905	9.06959	9.39164	9.16087	10.8838	10.8338	10.7301	8.86583	8.45064	8.49618	8.60787	7.53812	7.72449	8.40832	8.07397	7.66008	8.20118	7.49834	8.45622	8.09914	8.64116	8.31127	7.72256	8.25015	7.81234	7.82347	7.65449	8.25119	7.84896	8.10746	8.70274	9.29217	8.88214	6.67725	7.2773	7.67096	6.05664	6.33444	7.39164	7.77492	7.68895	8.05966	8.12927
E15 Acinar	1419398_a_at	Reep5	10.1593	10.1947	9.80086	9.99759	12.0236	12.6478	11.2199	13.3419	13.3034	13.184	10.0312	10.1491	10.6254	10.829	9.96272	10.1624	11.2719	9.3909	9.16963	9.24151	9.54482	9.94394	10.2339	9.98357	9.56001	9.53239	10.3541	10.4913	10.8046	10.518	10.7197	10.1345	10.1957	11.0131	11.0217	10.8636	11.3694	10.9247	11.3565	10.42	10.3148	10.7555	10.7289	10.7815	10.9192	10.6569
E15 Acinar	1416416_x_at	Gstm1	10.7421	10.7822	10.4258	10.7005	12.3945	12.8904	11.8293	13.3864	13.3604	13.2964	12.0138	12.0828	12.0289	12.0494	9.31469	9.79552	10.7212	9.91507	9.60946	9.69026	9.61651	10.0793	10.4598	10.1159	10.344	10.0948	10.1212	9.87881	10.608	9.9465	10.8988	9.85397	10.0728	11.0193	11.5546	11.4954	11.9386	11.4956	10.9974	11.3206	11.4078	11.0252	11.4947	10.9222	10.9822	10.9443
E15 Acinar	1448330_at	Gstm1	10.4127	10.4926	10.1939	10.4314	12.1034	12.7552	11.6268	13.2466	13.2425	13.1428	11.9666	11.9451	11.8925	11.7622	9.00955	9.48245	10.592	9.76163	9.16582	9.3911	9.31954	9.69687	10.2574	9.84334	10.0428	9.73802	9.93838	9.67135	10.2264	9.6605	10.5916	9.62518	9.81223	10.7803	11.2304	11.1301	11.6421	11.2559	10.8772	11.0292	11.2165	10.8318	11.2776	10.666	10.6093	10.7758
E15 Acinar	1448717_at	Gcdh	10.2724	10.2094	10.2978	10.2685	10.3368	10.7053	10.1031	11.3639	11.3991	11.3327	8.81327	9.53847	9.55915	9.53475	9.7738	9.86567	10.1661	9.71994	9.95923	9.35503	9.47329	9.99647	9.66563	9.87615	9.67861	9.72129	10.4299	10.1794	10.3972	10.409	10.4164	10.2874	10.1337	9.92829	9.91785	10.2275	10.7588	10.2735	10.4678	10.6739	10.5937	10.7534	10.3204	10.5773	10.4267	10.0961
E15 Acinar	1433839_at	Nars2	8.31208	8.31437	8.67041	8.31562	7.93639	8.09477	8.20309	8.99635	9.0194	8.99284	7.07769	7.20474	7.48419	7.29712	7.81029	7.55602	7.6978	7.96583	7.76545	7.79553	7.79017	7.26791	8.36717	7.97365	7.80778	7.67396	8.4039	8.10137	7.98972	8.30725	7.81841	8.04413	7.9696	8.16563	8.13876	8.02049	6.8057	8.18983	8.45128	7.81391	7.77714	7.6443	7.87223	7.72704	7.43162	7.39672
E15 Acinar	1435985_at	Farp2	10.2148	10.3336	10.2778	10.1922	10.0355	10.3272	10.0065	11.2062	11.1636	11.2707	9.12626	9.43586	9.4253	9.31022	9.4153	9.36989	9.79882	9.45604	9.69074	9.9421	9.45047	8.81648	9.26705	9.10859	9.06514	8.94233	9.92775	9.80449	9.71649	9.89146	9.38291	9.32038	9.46238	9.76818	9.83736	9.8677	8.03371	9.63124	9.44743	8.91904	9.08316	9.12286	8.64121	8.90884	9.02456	9.15116
E15 Acinar	1417059_at	Krtcap2	11.0042	10.9175	10.7937	10.8143	11.2121	11.4723	10.7836	12.3264	12.3351	12.2923	9.86041	10.3093	10.2757	10.4755	10.2981	10.3784	10.7976	10.6214	10.4308	10.1311	10.4846	10.7042	10.6686	11.1261	11.2971	10.971	11.0899	11.3945	11.4283	11.381	11.4591	11.4018	11.6221	11.2165	11.1526	11.2934	11.9931	11.208	11.5246	11.441	11.3239	11.3347	11.3162	11.2885	11.3489	11.4419
E15 Acinar	1423746_at	Txndc5	9.81375	10.0149	9.94361	9.97934	10.5311	10.7106	10.5978	11.0029	11.02	11.0107	8.94449	9.2535	9.41088	9.06526	9.37715	9.28616	9.45443	9.38883	9.11982	9.26434	9.07279	9.83668	9.72824	9.88895	9.58116	9.50599	10.1936	9.94664	9.80581	10.2875	9.9666	9.78115	9.70981	10.2336	10.515	10.4836	9.99475	9.46074	9.88927	10.1525	9.90625	9.50011	9.71266	10.0122	9.71108	9.83481
E15 Acinar	1427997_at	Ndufaf4	10.0731	10.1089	10.2856	10.2506	10.2536	10.3794	10.4744	11.0877	11.0889	11.0142	9.41395	9.17544	9.3381	9.36784	9.63604	9.86206	9.85994	9.70991	9.56513	9.49938	9.22407	10.0982	9.57535	9.48075	8.99125	9.18303	9.78539	10.0246	9.91483	9.7636	9.91205	9.3587	9.42191	9.78985	10.0889	9.62257	10.2743	9.5976	10.0876	9.78861	9.75234	10.1229	9.75136	9.78828	9.53741	9.83385
E15 Acinar	1417422_at	Gnmt	6.79688	7.04558	6.84039	6.73644	8.20804	9.17156	7.63071	10.1335	10.129	10.0538	8.01913	8.76849	9.96719	10.0047	6.34147	6.54365	7.31717	6.37182	6.94671	6.84791	6.62781	7.23718	7.53767	6.60617	6.70435	6.28482	6.68788	6.39344	6.90585	6.82396	8.62588	6.96528	6.952	7.87767	7.92391	8.10941	8.51882	7.58504	8.40874	7.82708	8.02699	7.74662	8.65608	8.06897	9.14624	8.16705
E15 Acinar	1439435_x_at	Pgk1	11.8437	11.9923	11.9614	11.8524	12.1418	12.2876	11.9638	12.5226	12.4643	12.4556	11.1337	11.3259	11.1948	11.3296	11.0181	11.3095	11.1276	11.6305	11.6021	11.5395	11.5439	11.445	11.425	11.2872	11.2238	11.0972	11.3718	11.0163	11.143	11.0958	11.5207	11.1614	11.2265	11.1837	11.0091	11.598	11.767	10.622	11.1196	11.5121	11.118	11.5381	11.235	11.1918	11.4428	11.4383
E15 Acinar	1436618_at	Sfxn5	9.57325	9.70975	9.41644	9.46313	9.54011	9.71085	9.05557	10.2161	10.1679	10.1622	9.32109	9.65046	9.75277	9.41772	8.82789	8.55215	8.78121	8.8499	8.55526	8.40282	8.96723	8.50515	8.40123	8.12079	8.5987	8.02715	8.8059	9.27441	8.77933	9.01432	8.73323	8.60582	8.94139	8.62562	8.75028	8.80794	9.41363	8.22327	8.44252	8.71381	8.82032	8.2667	9.59803	9.16954	9.02491	9.51527
E15 Acinar	1416234_at	Lrrc59	12.1245	12.1656	12.1192	12.2337	12.3561	12.7115	12.4351	13.1294	13.2014	13.2229	11.8398	11.8157	12.0304	12.0922	11.102	11.1886	11.631	11.5155	11.0274	11.2762	11.4239	11.1719	10.9881	11.1951	10.9899	11.0423	12.0002	11.9425	12.0736	12.1628	12.0625	11.9497	11.8393	12.2818	12.1127	12.1129	11.0365	11.8888	12.1169	11.9788	11.7737	11.7147	11.6414	11.6755	11.4899	11.5772
E15 Acinar	1424436_at	Gart	9.75016	9.71147	9.974	9.90369	9.90739	10.304	9.41469	10.7289	10.9009	10.8043	7.16887	7.14791	7.18415	6.93191	8.77612	8.6753	8.81695	7.83077	8.32526	7.57626	7.56901	8.58319	7.65087	7.30106	6.90168	6.98746	8.65682	8.59072	8.68618	8.8383	8.36219	8.50245	8.64711	8.14751	8.01741	8.11829	6.67459	7.95524	8.70948	7.89483	7.90179	7.33232	7.30536	7.28785	7.71695	7.53849
E15 Acinar	1433649_at	Kdm1b	9.03411	9.17874	9.27509	8.96789	9.48304	9.65084	9.66263	10.3353	10.2881	10.2248	9.09581	9.24928	8.88034	8.95293	8.91244	9.05876	9.21268	8.70738	8.67476	8.59978	8.70455	8.92941	8.66166	8.45789	8.72866	8.40455	8.15944	7.96719	8.09607	7.87691	7.34044	7.77338	8.25709	8.3651	8.42626	8.09522	6.0379	8.33945	8.72593	8.22711	8.07433	7.95148	8.26465	8.48835	8.37411	8.68505
E15 Acinar	1425213_at	Fam81a	7.5241	6.65487	7.013	7.4191	9.31007	9.99109	8.48872	10.8248	10.7636	10.9772	8.03558	7.85897	8.27747	7.56163	6.89864	6.76767	7.72306	7.60164	7.16891	7.70769	7.02758	7.80494	8.04843	9.12086	8.85457	9.0185	7.9729	8.58343	8.57031	8.17298	7.90742	8.42164	8.49832	7.46643	7.46335	7.37199	8.4471	6.03733	6.92096	6.49116	5.68393	7.07082	7.43377	7.52027	7.48337	7.66924
E15 Acinar	1436269_s_at	Htra2	11.4558	11.4876	11.168	11.2848	12.1023	12.3706	11.7416	12.6757	12.6342	12.5521	10.3898	10.1841	10.3753	10.7726	11.0805	11.0356	11.2783	10.1786	9.62102	10.2518	9.92966	10.4	9.7776	10.3014	10.008	9.82037	11.3491	11.0168	10.8579	11.0098	11.4263	11.1372	10.972	11.755	11.8031	11.6526	10.8853	11.1468	10.6297	10.1443	9.93782	10.0206	10.3165	10.0061	10.4185	10.1816
E15 Acinar	1460358_s_at	Nudt22	8.67076	8.72309	8.41438	8.5616	9.02161	9.4557	8.71654	10.3785	10.2609	10.3498	8.42001	8.70503	8.74608	9.17656	8.3731	8.42498	8.7865	7.48943	7.38851	7.09514	7.28233	8.98901	8.9498	8.5819	8.44263	8.16622	8.63281	8.59172	8.70302	8.99065	8.40774	8.48025	8.59542	8.61399	8.27645	7.92218	9.94847	8.85663	9.2608	8.8927	9.24652	9.23814	9.1321	9.14659	9.46381	9.01452
E15 Acinar	1439115_at	Mcph1	7.49703	7.38897	7.50926	7.65484	8.00583	7.71176	7.60565	8.23054	8.3187	8.27337	6.05683	6.3551	6.58976	6.40642	7.27694	6.89741	6.82052	6.42375	6.59344	5.76273	6.54313	6.91898	6.59339	6.71658	6.3393	6.55883	6.91879	7.19095	6.88607	6.85884	7.26957	6.79233	6.75173	7.23275	6.81729	6.77475	8.13218	6.75666	6.63573	7.43091	7.30188	7.76959	6.78801	7.2413	7.15551	6.77296
E15 Acinar	1417200_at	Tmem183a	9.7151	9.86844	9.71809	9.83591	9.66517	9.61215	9.79791	10.6821	10.6125	10.5801	9.4802	9.54948	9.66477	9.36986	9.4325	9.61103	9.70109	8.61703	9.08065	8.96428	8.8128	9.16007	9.60743	9.08244	8.8474	8.93353	9.55308	9.35582	9.33759	9.58826	9.10059	9.60808	9.32155	9.15709	9.1419	9.14166	7.72552	9.16937	9.31461	8.70695	8.59163	8.95839	8.73595	8.80007	8.91605	9.00962
E15 Acinar	1451329_at	Nudt22	7.16465	7.29064	7.09919	7.19455	7.69203	8.10809	7.37251	8.71996	8.74551	8.64002	7.0919	7.30974	7.36353	7.6411	7.10769	7.29423	7.42942	6.26634	6.4133	6.12825	6.16058	7.36708	7.80389	6.98391	6.94722	6.69623	7.06549	7.24908	7.17859	7.68217	7.22511	7.32913	7.32244	6.93241	6.90806	6.77117	8.92386	6.8817	7.61925	7.48965	7.61899	7.43802	7.44995	7.64966	7.7335	7.39103
E15 Acinar	1428635_at	Comtd1	10.3229	10.2539	10.0062	10.2288	10.2027	10.3921	10.0729	10.8599	10.8787	10.7927	8.29765	8.61986	8.80199	8.59275	8.12146	8.02073	8.75068	7.4359	7.24215	7.0672	7.40753	7.18398	7.95749	7.19177	6.99984	6.4613	8.87979	8.91016	8.9982	9.09718	8.2445	8.83642	8.75581	8.60939	8.83126	8.7529	8.08459	7.91604	8.18348	7.63137	7.78433	7.57956	8.7404	8.68657	8.59489	8.93059
E15 Acinar	1444262_at	1110017F19Rik	7.16724	7.03854	7.08975	6.97974	8.67208	9.36348	8.22096	10.7921	10.6618	10.5773	8.77214	9.54909	9.92113	9.23629	7.35629	7.3315	7.96541	7.74365	7.88127	7.5911	8.02711	7.98189	9.44197	8.74584	8.93208	8.31401	7.19128	7.60951	7.86805	7.08524	6.06988	6.51298	8.25705	6.96758	7.50622	6.94558	7.87044	7.15064	7.47569	6.97948	7.25931	7.7538	7.64593	7.52387	7.04694	7.55469
E15 Acinar	1427938_at	Mycbp	10.8828	10.746	10.8442	10.8609	11.1936	11.4949	11.1436	12.0561	11.9393	11.984	9.35215	9.28622	9.01078	9.21009	10.5814	10.4732	10.8353	10.139	10.1071	10.1121	9.90691	10.45	10.074	10.2498	10.1473	9.91299	11.1546	11.2659	11.3389	11.2527	10.6506	11.0834	11.1279	10.3569	10.4238	10.5749	10.9007	9.93725	10.3004	9.74999	9.79668	9.99472	9.57821	9.5442	9.71964	9.7572
E15 Acinar	1423836_at	Zfp503	8.61938	8.64549	8.58301	9.11276	8.45605	8.96025	7.56117	10.0349	10.23	10.1143	7.88538	7.47221	7.50511	7.15373	7.21191	7.07837	7.37616	7.57081	7.19544	6.74478	7.05222	6.45348	6.65395	6.27794	6.87396	6.8433	8.24538	7.88001	8.12273	7.98708	9.39795	8.45518	8.94185	8.5506	8.98547	9.25947	7.6886	6.71462	6.39793	6.60869	6.2176	6.65826	6.9783	6.83815	6.64671	6.17976
E15 Acinar	1437325_x_at	Aldh18a1	10.9508	11.0333	11.0935	10.978	11.9238	11.9336	11.9446	12.6186	12.5748	12.5158	9.2538	9.62019	9.57875	9.67097	11.0138	11.1303	11.0699	11.1807	11.2529	11.1475	11.235	11.6916	11.5327	11.4248	11.3277	11.231	11.4216	11.2005	11.4136	11.4068	10.7407	10.8492	10.6241	11.4664	11.187	11.2093	11.6589	10.7887	11.3485	11.5246	11.1683	11.3898	11.352	11.2533	11.2191	11.52
E15 Acinar	1435076_at	Fam57a	9.27202	9.25024	9.36051	9.3599	9.12212	9.54384	8.73675	10.5388	10.5013	10.6116	6.88035	6.07693	6.56379	6.67407	8.96268	8.75721	8.71996	9.40838	8.99572	8.95439	9.06642	7.06756	7.28881	7.26129	7.82171	7.94343	9.11468	9.15065	9.28223	9.26755	9.12817	8.5986	8.83665	9.2614	9.57229	9.38798	8.46221	8.21907	8.3213	7.72503	8.25416	7.98553	7.83821	8.42481	7.9418	7.98939
E15 Acinar	1419351_a_at	l7Rn6	11.3031	11.3815	11.4154	11.3767	11.2049	11.2903	11.3284	11.7211	11.6723	11.6409	9.79454	10.2527	9.96661	9.73765	10.2737	10.3103	10.6934	10.3326	9.90466	9.94596	10.1215	10.2287	10.1345	10.2286	10.0904	10.5493	10.9011	10.4523	10.6245	10.4382	10.5897	10.7234	10.6833	10.0273	10.416	10.6857	10.7841	10.6738	10.7074	9.80239	9.47803	9.66731	9.69994	9.80753	9.78174	10.0058
E15 Acinar	1449869_at	Vpreb1	7.41714	7.63475	7.28781	7.44706	7.52122	7.55841	7.28867	7.84766	7.91503	7.8654	5.79133	6.91695	6.72842	6.62021	6.91545	6.38921	7.02861	6.15535	6.25419	6.03958	5.57531	6.9225	7.43553	6.30097	6.63193	6.83071	6.3481	6.34881	6.58806	5.9623	5.84267	5.93037	6.85203	6.56782	6.95934	7.04748	6.50148	6.56206	6.06875	5.81051	6.01163	6.72556	6.2788	6.0874	5.86759	5.76228
E15 Acinar	1424201_a_at	Seh1l	8.62612	8.81057	8.79185	8.8605	8.60847	8.57506	8.86936	9.5963	9.48103	9.51276	7.72609	7.51302	7.73143	7.27922	7.76077	7.76761	8.08733	6.8032	7.29118	7.08427	6.53666	5.12368	4.37468	6.87137	6.73	6.58615	7.76549	7.50452	7.41853	7.34425	7.129	7.83747	8.88188	7.45962	7.5979	7.56308	8.16299	7.53453	7.68856	7.21184	6.87533	6.66975	6.75341	6.67559	6.72519	6.85031
E15 Acinar	1426394_at	Eif3j	10.5132	10.6696	10.7877	10.598	10.361	10.5265	10.5143	11.3916	11.3427	11.4583	10.3977	10.2484	10.1806	10.0271	10.0087	10.1529	10.195	9.88529	9.59019	9.87614	9.70399	9.45279	9.1469	9.54988	9.24825	9.61385	10.1416	10.1473	10.3088	10.2402	9.98022	9.95082	9.53401	9.83782	9.88693	9.8755	6.59385	9.74965	10.004	9.6842	9.22578	9.12502	9.20245	9.47926	8.91874	9.26264
E15 Acinar	1435057_x_at	Polr1e	10.8399	10.765	10.6558	10.6177	10.5757	10.7824	10.146	11.0787	11.1311	11.0269	9.02776	9.1247	9.02349	9.37852	9.75298	9.78383	10.1457	10.3674	10.5315	10.4199	10.1438	9.72936	10.3245	9.83648	9.44372	9.6922	9.86844	9.92812	9.70273	9.70338	9.57159	9.61869	9.24411	9.59583	9.48607	9.08385	9.65318	9.22053	8.96779	9.22536	9.22725	9.54719	9.4872	9.40443	9.51087	9.63662
E15 Acinar	1419173_at	Acy1	8.63973	8.584	8.39816	8.75107	8.38812	8.72218	8.27241	9.55973	9.53552	9.42798	7.16413	7.44763	7.42915	7.57137	7.35153	7.4198	7.69245	6.53943	6.91824	6.65644	6.74346	7.95562	7.67259	7.83373	7.52554	7.49366	8.1492	8.14067	8.05567	8.29979	8.08311	8.08753	8.09158	7.63564	7.88271	7.91853	8.87893	7.62827	8.08192	7.76588	7.78105	8.06539	7.79886	7.8902	7.71357	7.15912
E15 Acinar	1424139_at	Rap1a	10.9356	10.9724	10.88	10.9499	11.2351	11.346	11.4138	12.045	12.0665	12.1446	11.2132	10.8502	10.7396	10.4795	11.1167	11.1968	11.1236	10.9468	10.7299	10.8789	10.9049	9.75431	9.61295	10.5042	10.4635	10.3869	11.2791	11.2156	11.1962	11.2357	10.7523	10.9321	11.0198	11.3093	11.2597	11.2763	9.11931	11.4152	11.2588	10.853	10.4092	10.5591	10.4144	10.4178	10.5178	10.8904
E15 Acinar	1454642_a_at	Commd3	11.4397	11.4917	11.6946	11.5211	11.8754	11.9123	12.0386	12.3911	12.3051	12.3535	10.8385	11.1442	10.8281	10.9443	11.8285	11.9607	12.0026	11.3087	11.4385	11.4268	11.192	11.6065	11.5659	11.1842	11.0213	11.1082	11.7399	11.2836	11.4928	11.3621	11.1039	11.2293	11.4039	11.6254	11.6827	11.6489	11.366	10.9458	11.3999	10.8304	10.7773	10.7948	10.838	10.8415	10.8483	10.8102
E15 Acinar	1436219_at	4933403F05Rik	7.56059	7.9183	7.73413	7.80133	8.25493	7.58383	8.44123	8.61121	8.64203	8.55209	7.35366	6.95825	6.94971	6.76063	7.43663	6.9069	7.19672	7.58595	7.08819	7.2828	7.24049	7.80768	7.44707	7.12591	6.92187	6.67637	7.76144	7.60561	7.7273	7.64177	7.13316	7.21324	7.26903	7.87442	8.60354	8.49133	8.06523	7.79668	7.55473	6.68776	7.33495	7.55863	6.57957	7.07338	6.7992	7.54883
E15 Acinar	1422624_at	Rev1	9.73654	9.67923	9.79721	9.73892	8.70964	8.90215	8.63376	9.96555	10.0077	9.95233	8.46629	8.1726	8.17241	8.08096	9.1468	8.92886	9.07361	8.92955	9.22643	9.02026	8.54876	8.05194	7.79531	9.21266	9.04329	8.73403	9.26783	9.14221	8.7988	9.14422	9.18268	8.83284	9.10578	9.25731	9.2599	9.00289	9.92583	8.99745	9.02055	8.44682	8.56317	8.59615	8.35331	8.27772	8.31751	7.83263
E15 Acinar	1425388_a_at	Tpk1	7.5443	7.70411	7.68443	7.74374	8.61485	8.70601	8.95385	9.16086	9.14157	9.23607	8.98119	8.77727	8.75253	8.62079	8.01014	7.98233	8.29492	8.28839	8.27421	7.96878	8.52512	6.83446	7.19526	7.44409	7.19831	6.92987	8.22987	8.33541	7.91009	8.22308	7.61732	7.99853	7.80145	7.85795	8.02944	7.82609	8.55533	7.496	7.82368	7.50935	7.45361	7.87287	7.45453	7.55871	7.42363	7.14956
E15 Acinar	1442366_at	Gm14164	6.82345	6.8358	6.54285	6.97266	6.888	7.13798	6.85333	8.24435	8.17842	8.21425	5.54983	6.15964	5.8252	5.87938	6.53914	6.82331	7.23557	6.9051	7.48758	7.23589	6.74279	7.6362	8.72588	8.27876	7.54443	7.16966	7.55306	7.75562	7.70451	7.20569	6.30262	7.09621	6.50575	7.06347	7.09208	6.65671	6.96162	6.38452	7.03854	6.44176	6.7352	7.42777	6.77863	6.60021	6.69926	6.70495
E15 Acinar	1422603_at	Rnase4	12.0866	11.9576	12.3886	12.3211	12.5175	12.924	11.9595	13.548	13.5227	13.4919	11.683	10.7696	11.4472	11.6609	12.0891	11.962	12.1455	12.052	12.7335	12.373	12.2762	12.8525	12.6029	12.7355	12.4909	12.8456	13.061	12.7747	12.8181	12.9994	12.057	12.4751	12.6003	13.1787	12.956	12.8046	10.9237	12.8723	13.0406	12.1033	12.1894	12.4497	12.6936	12.5422	12.612	12.7487
E15 Acinar	1450090_at	Zfp101	10.2152	10.1259	10.2743	10.3567	10.2972	10.2408	9.8714	10.9366	10.8498	10.8659	8.07087	8.99449	8.89911	8.52559	10.0727	9.945	9.90136	9.47048	9.34542	9.46766	9.24602	8.94328	8.78864	9.28286	9.40571	9.10903	9.34881	9.25924	8.91179	9.31982	9.45244	9.34718	9.46721	9.48172	9.56436	9.55158	5.9699	9.63261	9.25174	9.17691	9.01949	9.33544	8.38631	8.75607	8.58039	8.39887
E15 Acinar	1415891_at	Suclg1	11.5499	11.5689	11.7785	11.6278	11.6369	11.7475	11.6684	12.1171	12.1416	12.1467	10.6165	10.9624	10.7045	10.7138	11.1722	11.2433	11.2935	10.3532	10.4425	10.2191	10.1163	10.5961	10.371	10.7734	10.3771	10.4224	11.5141	11.5258	11.5542	11.5886	11.0957	11.4219	11.3841	11.2637	11.3006	11.3169	9.42158	11.0575	11.5207	10.9963	11.1559	11.1252	10.8401	11.0782	10.902	10.9742
E15 Acinar	1441327_a_at	Ssr1	7.91573	7.7575	7.67151	7.87181	7.77366	8.22925	8.07879	9.39026	9.29852	9.37302	8.22456	7.66003	8.19605	7.67176	6.62252	6.88454	7.47601	8.12803	8.42744	8.23757	7.72627	8.67489	8.78847	9.33398	8.57297	8.33734	8.26699	7.83892	8.12501	7.51193	8.15282	8.06895	7.87377	7.43601	7.91772	8.02691	9.34709	8.38727	8.58426	8.37028	8.60483	8.73301	8.64049	8.56676	8.40539	9.0089
E15 Acinar	1451095_at	Asns	10.7755	10.7055	10.7884	10.6827	11.7994	12.4051	10.99	13.2472	13.1524	13.0762	11.0022	11.0123	11.954	12.0847	10.1369	10.0996	10.8629	10.8564	10.7632	10.8568	10.771	11.9623	12.218	11.6377	11.3039	11.2805	10.938	10.8379	10.8855	10.9034	10.4534	10.7617	10.3932	11.2907	10.9249	10.4638	10.0353	11.1029	11.8055	11.77	11.7845	11.6644	12.1733	12.026	12.1181	12.1306
E15 Acinar	1417097_at	Mecr	9.97974	9.81269	9.90517	9.91301	9.9468	10.1079	9.64285	10.2677	10.2896	10.2299	8.58928	8.93825	8.99323	9.16583	8.70749	8.76263	8.94341	7.9829	8.16372	7.69682	7.90247	9.05837	9.63211	9.05189	9.02159	9.07507	9.2674	9.32756	9.4584	9.64881	9.13683	9.35774	9.40674	8.80381	8.77255	8.71385	9.98984	9.04818	9.36007	8.94504	9.20413	9.08283	8.83487	8.68451	8.59107	8.52062
E15 Acinar	1429587_at	Rbm34	9.78699	9.50997	9.79466	9.80373	10.0637	10.0667	10.3578	10.3666	10.4583	10.4006	9.58539	9.53494	9.56581	9.42133	9.85849	9.61801	9.40771	9.2607	9.43411	9.18414	9.18471	8.23264	8.51839	8.80857	8.55464	8.88378	9.92794	9.53906	9.66135	9.57166	8.53397	8.88615	8.87372	9.49142	9.72088	9.63413	9.62518	9.10947	8.87617	9.18525	9.37519	9.27491	8.94315	9.17726	8.83898	8.92042
E15 Acinar	1448212_at	Psmg2	11.319	11.4221	11.4459	11.3594	10.9616	10.8744	10.9532	11.6911	11.6934	11.6284	9.28194	9.43654	9.28274	9.43783	10.7135	10.5661	10.8786	9.88843	9.86348	9.67046	9.68733	10.2327	10.0623	10.3054	10.287	9.96363	10.7881	10.8068	10.7133	10.839	10.6389	10.9006	11.1313	10.7629	10.7699	10.6375	11.1786	10.9061	10.9213	10.414	10.482	10.3443	10.0034	10.1635	10.0436	9.9514
E15 Acinar	1419046_at	Brp16	9.38545	9.14785	9.37118	9.61892	9.31543	9.49101	9.08078	9.97206	9.84226	9.89739	6.95416	7.26779	8.10192	8.2144	8.32203	8.43975	8.76359	7.7557	8.07697	8.34831	7.86082	8.35356	8.27016	7.81574	7.78359	8.2815	8.8566	8.49893	8.84953	8.90824	8.58309	8.56977	8.72031	8.8486	8.53991	8.35194	9.19602	7.87393	8.49412	8.57922	8.84813	8.85669	8.36166	8.49284	7.57782	7.89946
E15 Acinar	1456071_a_at	Cycs	11.8316	12.2049	12.2735	11.999	12.2229	12.4935	12.2763	13.1302	13.094	13.0208	11.4214	11.5573	11.1703	11.5527	12.0593	12.3689	12.2841	11.5659	11.7875	11.864	11.7853	12.32	11.6476	11.6261	11.3999	11.8616	12.4636	12.1896	12.4661	12.3167	11.5585	12.0337	11.5509	12.169	12.0467	11.9797	9.07626	11.8345	12.3615	11.9542	11.4578	11.3549	11.3007	11.2725	11.4422	11.6589
E15 Acinar	1422483_a_at	Cycs	12.679	12.5545	12.5854	12.5261	12.3923	12.6709	12.2007	12.9967	12.9758	13.041	11.3641	11.2888	11.0514	11.2419	12.1386	12.1706	12.4958	11.6556	11.7023	11.7034	11.6687	11.6224	10.8853	11.4742	11.123	11.55	12.3723	12.5618	12.7185	12.5938	12.0316	12.4917	12.1557	11.9071	12.0757	11.9601	12.5141	12.3625	12.3732	11.7474	11.3316	11.4276	11.2348	11.3792	11.4218	11.4338
E15 Acinar	1426265_x_at	Dlat	9.81829	9.97764	9.95969	9.79468	9.5813	9.72944	9.91633	10.6324	10.6977	10.5731	8.73986	8.61911	8.54186	8.46829	9.40091	9.69754	9.83461	9.25511	9.41783	9.40788	9.18442	9.13299	9.89888	9.21503	9.02209	9.01699	9.99315	9.7189	9.42347	9.61349	8.82514	9.5913	9.29942	9.48822	9.31367	9.20793	7.99347	9.37992	10.0794	9.08251	8.71211	9.00242	8.8414	8.7775	8.61582	8.76466
E15 Acinar	1457434_s_at	Ptpla	10.623	10.3892	10.4586	10.5485	11.1379	11.4591	10.899	11.8725	11.9741	11.8902	11.0265	11.1023	10.8525	11.2218	11.1165	10.9842	11.1218	11.0216	10.8858	10.648	10.7995	8.91608	9.68029	8.90643	8.86381	8.93334	10.51	10.4927	10.7265	10.2205	10.6694	10.8298	10.9739	11.0332	10.8143	10.7949	9.83265	8.70007	9.02968	9.10448	9.40272	9.72209	9.86388	9.5251	9.67246	9.31714
E15 Acinar	1423730_at	Clptm1l	10.7446	10.9803	10.9688	10.8176	11.2243	11.3365	11.43	12.3902	12.3019	12.2911	10.2918	10.517	10.5021	10.4792	11.0401	10.9985	11.0022	10.7433	10.7063	10.7245	10.7917	10.9426	10.7053	10.8865	10.6307	10.4563	11.9337	11.7482	11.9221	11.8864	11.3799	11.5869	11.5186	11.8619	11.6538	11.7576	11.8259	11.4884	11.7548	11.6094	11.0635	11.1955	11.2473	11.3729	11.2809	11.5047
E15 Acinar	1431561_a_at	Dhx34	9.50075	9.41451	9.08106	9.24359	10.7366	11.3649	9.88225	12.4579	12.292	12.2578	8.85456	9.04185	10.0275	10.2224	9.2814	9.35722	10.1661	8.31049	8.23912	8.10982	8.21093	9.74274	10.1385	9.23625	9.34565	8.5912	9.26869	9.4576	9.32814	9.41796	8.94738	9.00555	9.19457	9.22411	9.14527	9.24425	10.365	8.78008	9.09258	9.28148	9.38092	9.75227	9.57109	9.25139	9.65838	9.33999
E15 Acinar	1429911_at	Mcph1	7.91036	8.17716	7.89341	8.01305	7.8705	8.08309	8.005	8.44122	8.55701	8.4338	6.98311	7.22869	7.28385	6.88198	6.53675	6.74241	7.34502	6.82274	7.43806	7.21208	7.67965	7.95546	6.16008	6.09062	6.23096	6.22868	6.83079	6.53842	7.06235	6.86102	6.8236	6.88765	7.24463	6.82389	6.83224	6.94552	6.20816	6.83501	7.03945	6.8042	7.19735	7.05907	6.38811	6.41451	6.91095	5.79338
E15 Acinar	1433539_at	Commd3	11.6256	11.7897	11.8684	11.8187	12.0054	12.0315	12.2281	12.4802	12.42	12.4918	10.8435	11.019	10.8722	10.9758	11.9726	12.0456	12.1821	11.4684	11.5174	11.4148	11.1878	11.4147	11.4511	11.2423	11.0775	11.058	11.7828	11.5221	11.6772	11.6732	11.3515	11.5332	11.792	11.7019	11.8028	11.7117	9.25949	11.5405	11.5886	10.8392	10.9068	10.8955	10.952	11.0741	10.9466	10.683
E15 Acinar	1455586_at	Rnf168	8.9	8.37259	8.78622	9.01071	9.33448	9.27014	9.34532	9.65754	9.69333	9.6856	7.49777	7.66747	7.93917	7.78143	8.44143	8.18037	8.07879	8.02056	8.18709	8.10273	8.01245	7.21153	8.01175	7.52257	7.88782	7.09486	8.66442	8.44266	8.26641	8.60932	8.47361	8.09082	8.26414	8.97999	8.81056	8.6495	9.76844	8.50022	8.63148	9.17488	9.19983	9.52386	9.15163	8.96195	8.65821	8.80132
E15 Acinar	1424538_at	Ubl4	10.8265	10.5768	10.5524	10.6616	10.623	10.9349	10.3832	11.252	11.3581	11.3862	9.99031	10.1617	10.107	10.1282	9.7349	9.73073	10.0836	8.93193	8.91816	8.76513	8.5626	9.44677	9.48752	8.93202	8.94905	8.61604	10.0075	10.1104	10.1912	10.1385	10.3504	10.1376	10.3022	9.83106	9.83608	9.71134	10.3174	9.86462	10.0491	9.35185	9.59021	9.89653	9.76361	9.59925	9.71333	10.0569
E15 Acinar	1431431_a_at	Romo1	7.35777	7.46318	7.71164	7.71472	7.54071	7.67753	7.3318	8.09368	8.00836	7.99213	6.031	6.38539	6.39911	7.15698	7.04975	7.20091	7.58589	6.06153	6.07032	6.23569	6.16788	6.75149	5.80717	6.15672	6.04169	6.36327	7.00289	6.7269	6.70608	7.24763	6.68039	6.4806	6.25336	6.8715	7.0363	6.76114	8.37807	6.69097	6.90775	6.87127	7.0718	6.21499	6.37506	6.97575	6.48272	6.86162
E15 Acinar	1424333_at	Rg9mtd1	10.0229	10.1262	10.1258	10.2879	9.59915	9.75692	9.78916	10.515	10.6288	10.5857	8.9839	8.97673	9.36245	9.07741	9.41952	9.41312	9.56318	9.61137	10.1614	9.74204	9.67615	8.72036	9.01666	9.66512	9.32844	8.89561	9.74767	9.72568	9.36552	9.72999	9.18121	9.24344	9.23946	9.46405	9.43992	9.30441	8.02052	9.17661	9.76527	9.08875	9.16904	9.00272	8.72991	8.95175	9.11097	8.61582
E15 Acinar	1417098_s_at	Mecr	10.4846	10.2962	10.4444	10.549	10.6064	10.7877	10.3851	10.972	11.0675	10.9519	9.04089	9.56739	9.53015	9.69885	9.48976	9.3706	9.60117	8.57692	8.73956	8.76372	8.81639	9.56764	10.0336	9.6779	9.54311	9.83522	10.0336	9.86673	10.124	10.2387	9.94745	9.98519	9.90632	9.46825	9.43098	9.41446	10.5093	9.63433	9.95484	9.33193	9.63406	9.76128	9.20371	9.31007	9.32087	9.14472
E15 Acinar	1428543_at	Ppat	11.1178	11.1373	11.2107	11.2817	11.4313	11.4359	10.9625	11.9306	11.8263	11.8356	9.36129	9.73658	9.63715	9.19885	10.2158	10.1501	10.0235	10.8553	10.747	10.8686	10.7635	9.64057	9.62744	10.0792	9.88648	10.3034	10.361	10.4183	10.4572	10.1758	9.63143	10.1629	9.68623	10.2741	10.3348	9.90995	12.5475	10.9783	11.0284	11.1388	11.3606	10.6294	10.3029	10.719	10.6531	10.36
E15 Acinar	1449936_at	8430419L09Rik	8.09083	8.27393	8.35741	8.23657	9.14027	8.99398	9.58398	9.31749	9.18665	9.16362	7.12201	7.93931	7.67063	7.28625	7.86614	7.47764	8.35363	7.3215	6.59904	6.62688	6.30103	8.36152	7.45523	7.04214	6.75061	7.39249	8.07356	7.50245	7.95983	7.37467	6.49022	7.8548	7.79674	6.65928	7.21833	7.48499	7.0307	6.86716	7.28189	7.20027	6.79934	6.82065	6.89143	6.96077	6.68074	7.18191
E15 Acinar	1423735_a_at	Wdr36	10.3915	10.5696	10.2268	10.4139	10.0953	10.413	10.2222	10.5952	10.6759	10.5764	10.0437	9.48619	9.87158	9.86292	8.95283	9.10975	9.61851	9.18493	9.42833	9.17177	8.98748	9.41955	9.24812	9.1943	8.80309	8.78748	9.29524	9.4281	9.43469	9.25457	9.03634	9.09597	9.10222	9.41624	9.44239	9.14999	10.4388	9.55182	9.75009	9.21326	9.36911	9.5702	9.56027	9.11544	9.32818	9.11936
E15 Acinar	1419114_at	Alg14	9.15288	9.23267	9.15685	9.1839	9.31804	9.41599	9.41012	9.84093	9.81885	9.75917	8.10323	8.42079	8.20182	7.8366	8.91742	8.68556	9.32586	8.61117	8.54251	8.16611	8.46783	7.02852	8.59583	7.71785	7.67621	7.15031	8.87187	9.16702	8.95799	9.19179	9.3593	8.97864	9.13174	8.75608	9.09718	9.28277	8.34628	8.58063	8.84808	8.40403	8.02224	8.96331	8.27987	8.46573	8.32777	8.81684
E15 Acinar	1417161_at	Cdk2ap2	10.2992	10.377	10.2207	10.3527	10.9876	10.9435	11.0868	11.52	11.4716	11.5396	10.0041	10.5497	10.3233	10.4091	9.62774	9.53685	9.83465	9.88007	9.91898	10.0273	10.0598	9.35574	9.75888	10.3656	10.2813	10.1561	10.7124	11.2211	11.3815	10.9804	10.9675	10.9458	11.1869	10.3692	10.4607	10.9655	11.6062	11.3421	11.1819	10.6935	10.5214	10.4574	10.4712	10.4539	10.5191	10.2947
E15 Acinar	1437286_x_at	1110020G09Rik	7.81245	7.90329	8.23405	7.98151	8.34844	8.77399	8.24597	9.71706	9.68081	9.47082	6.74386	6.95058	7.07499	6.54678	6.93306	6.92229	6.81602	7.48528	7.88018	7.7778	7.33707	6.71761	6.60259	6.22635	6.2915	6.17455	6.7965	6.70949	6.87683	6.15907	6.40849	6.16187	5.63464	6.29652	6.42716	6.44616	4.70853	5.53295	5.85449	5.57714	5.6723	5.83125	6.18978	5.88247	6.21618	5.21221
E15 Acinar	1434604_at	Eif5b	11.2427	11.1745	11.3852	11.3695	11.3968	11.4276	11.5655	11.7624	11.7825	11.8361	10.3506	10.141	10.4165	10.2874	11.2089	11.272	11.4744	10.1367	9.91352	10.113	10.2261	9.32646	9.36892	9.43875	9.47948	9.15121	11.1047	10.9817	11.0875	10.979	10.2946	10.6182	10.7878	10.7974	10.9094	10.8558	10.7246	10.895	10.6485	9.90656	9.78737	10.072	10.0922	10.1425	9.78411	10.3143
E15 Acinar	1425780_a_at	Tmem167	11.8974	11.9033	11.9645	11.97	11.8868	12.0859	11.9043	12.6954	12.7336	12.7213	10.2274	10.3096	10.3233	10.3999	11.4892	11.4951	11.6699	11.5214	11.3545	11.4093	11.4851	10.8198	10.8072	11.099	11.1814	11.1676	12.1049	12.1954	12.2591	12.1974	12.0191	12.1665	12.3389	12.2001	12.2592	12.2609	12.3336	12.0881	12.3004	11.5735	11.3324	11.2704	11.1986	11.3656	11.3619	11.2442
E15 Acinar	1425473_at	Med17	9.79139	10.1279	10.1672	10.4515	10.4568	10.1526	10.7623	10.7935	10.8936	10.8239	8.14048	8.31291	8.17555	7.94581	9.57365	9.36306	9.61869	8.37055	8.27539	8.75286	8.27725	7.3856	7.1572	8.06922	8.29082	7.99539	10.0282	9.52077	9.76842	9.89088	9.34741	9.40192	9.34014	9.64856	9.96487	9.78623	9.86608	9.51663	9.35113	8.11792	7.96733	7.8452	8.00479	8.32285	7.91016	7.36683
E15 Acinar	1427570_at	Srpr	9.11564	9.08386	9.11655	9.05517	8.8979	8.93017	9.17689	9.59787	9.68367	9.68486	8.01307	8.11312	7.5677	8.10892	8.86805	8.82183	9.0626	8.30335	8.57509	8.55722	8.48372	7.30374	8.14827	8.14847	7.93527	8.02178	8.98716	8.66121	8.88394	9.10292	9.32574	8.82218	8.73503	8.56547	8.64621	8.43644	7.99225	8.77662	9.05097	8.8091	8.97097	8.91841	8.80114	8.81087	8.77916	9.06216
E15 Acinar	1435655_at	Rpl12	9.76511	9.49079	9.63805	9.44294	9.12049	9.60086	8.81279	10.0673	10.1267	10.0176	8.59897	8.3861	8.59087	8.74787	8.08186	8.12197	8.50152	8.74741	9.14772	9.13244	8.38424	8.98663	9.12621	8.97276	9.00027	8.51081	8.60795	8.67828	8.92786	8.81229	9.59479	8.89116	9.28318	9.00092	9.13242	8.99015	5.50055	8.89734	8.09299	8.35333	8.53105	8.03881	7.88113	7.96148	7.76236	8.15096
E15 Acinar	1427417_at	Scml4	8.37384	8.25866	8.31111	8.29042	8.83926	9.67047	6.97452	10.4904	10.4968	10.3145	5.90565	5.93954	6.05539	7.06594	7.68828	7.42346	7.86264	9.2155	9.06021	9.07626	9.13275	8.51492	8.59796	9.05208	9.14221	9.02869	8.07637	8.71567	8.28925	7.77964	7.84109	8.35858	7.32651	7.58006	7.44241	7.52544	8.50556	9.66484	8.96837	8.62299	8.87968	9.47719	9.53642	9.28701	9.30006	9.47932
E15 Acinar	1421260_a_at	Srm	11.592	11.5236	11.3887	11.3689	11.2939	11.7837	10.9272	12.2551	12.374	12.2043	8.6291	8.87858	9.47058	9.51023	9.34155	9.45518	10.0984	9.2123	9.09683	8.97522	8.93415	10.6264	10.252	10.2176	9.58378	9.72629	10.8192	11.0157	11.17	11.1671	11.1002	10.8813	10.8573	11.427	11.1414	11.2858	11.269	10.7339	10.9364	10.6712	10.8976	10.967	10.2564	10.2534	10.4534	10.676
E15 Acinar	1423972_at	Etfa	11.7034	11.8047	12.107	12.1781	12.2277	12.1396	12.504	12.7539	12.8348	12.7965	10.7742	10.9932	10.8717	10.793	11.7085	11.6208	11.8562	11.3292	11.448	11.499	11.0975	10.2971	9.93749	10.2643	9.9326	10.0503	12.3926	12.0294	12.1406	12.1593	11.4366	11.902	12.1885	11.8319	12.1498	11.9432	10.5653	11.8594	11.7508	10.5108	10.2896	10.551	10.2115	10.3915	10.0899	10.0862
E15 Acinar	1422477_at	Cables1	8.36824	8.29474	8.19254	8.08009	7.39541	8.00627	6.80601	8.81249	8.89176	8.82572	8.71122	8.63221	8.53605	8.35908	7.57363	7.69662	8.09303	8.16997	7.92842	8.02293	7.97053	7.22134	6.60761	7.24271	6.58505	6.19101	7.30178	7.85884	8.08134	7.69034	8.33108	7.91915	8.04409	7.98063	8.20467	8.03396	7.46036	7.15792	7.17563	7.16324	7.70596	7.52983	7.67203	7.66366	7.60522	8.44559
E15 Acinar	1452743_at	Pole3	8.74847	8.84887	8.62993	8.71262	8.50875	8.5529	8.93722	9.06528	8.95935	8.98159	7.76701	8.1335	8.10414	8.15829	7.56173	7.89021	8.39917	7.56906	7.68476	7.90019	8.01952	8.23308	8.52943	7.84659	7.89759	7.31052	7.4775	7.69531	7.43881	7.36028	7.83569	7.33798	7.87082	8.02992	8.11844	7.8732	6.21933	7.57678	7.61623	7.3249	7.38979	7.35466	7.3982	7.54897	7.27978	7.00012
E15 Acinar	1422770_at	Rad51l3	9.06149	9.2622	9.05923	9.16305	9.62679	9.89896	9.32338	10.564	10.541	10.5302	8.97924	9.53849	9.35792	9.39924	8.87223	8.94374	9.2507	10.1841	10.0755	9.76283	10.0466	10.3713	10.2357	9.90699	10.2858	9.35868	8.83101	8.87207	9.20809	8.97442	8.3319	8.57201	8.67651	8.83932	8.70028	8.80821	9.25285	9.23488	9.33363	9.90221	10.4484	10.6181	10.2037	10.1569	9.96825	10.135
E15 Acinar	1417300_at	Smpdl3b	7.88174	8.07905	7.83625	8.47225	8.31291	8.9143	7.20685	10.6434	10.8222	10.5133	7.34964	6.59889	6.74614	7.30604	5.92276	5.73901	6.65306	6.43843	5.68248	6.0148	5.52004	6.38133	6.35121	5.90698	5.88589	6.00713	6.44341	6.22186	6.67838	5.66873	6.14777	5.76329	5.60306	6.95302	6.6577	6.13223	6.38328	5.55853	5.32225	5.81436	6.06408	5.3911	6.61154	6.03694	6.06153	5.89083
E15 Acinar	1454922_at	Wdr92	8.38458	8.46335	8.91181	8.85773	8.58093	8.80868	9.10061	9.53993	9.51108	9.68205	6.28792	6.57219	6.3726	5.89592	8.27085	8.2372	8.44649	7.21694	7.02566	7.128	7.15566	6.68867	6.28525	5.87716	6.61024	6.65355	9.00491	8.71282	8.9562	8.79508	7.73746	8.16971	8.0398	8.06601	8.29012	8.14538	5.6134	8.17803	8.67359	7.2319	7.15369	7.05566	7.23518	7.43141	6.65543	7.01345
E15 Acinar	1452927_x_at	Tpi1	12.4884	12.4292	12.6991	12.6352	12.6162	12.6999	12.8699	12.8693	12.9067	12.7967	11.3104	11.6322	11.4567	11.5643	11.7708	11.9067	11.9803	11.1515	11.2395	11.0377	11.0425	11.5735	11.6082	11.3719	11.1091	11.1283	11.9049	11.7457	11.6879	11.9337	11.9253	12.1707	12.2889	11.869	11.8009	12.2953	12.1565	11.3691	11.6484	11.528	11.5312	11.4165	11.5983	11.5829	11.3004	11.4215
E15 Acinar	1429411_a_at	Eny2	11.3646	11.5459	11.4554	11.5946	11.7881	11.8534	11.6433	12.0791	12.153	12.0238	10.2386	10.3533	10.3085	10.4477	11.1732	11.183	11.4423	10.7259	10.6269	10.6518	10.8031	10.8177	10.1034	10.3686	10.1428	10.4245	11.0694	11.1384	11.3162	11.1486	10.957	11.0697	11.0525	11.0538	11.3761	11.3425	9.26602	10.9518	11.0469	10.4253	10.246	10.5729	10.2789	10.5075	10.5618	10.5964
E15 Acinar	1455395_at	Oxsm	7.60571	7.63532	7.76479	7.72549	7.77063	7.88195	8.69042	9.0439	8.94092	8.94162	6.19283	6.8126	6.12909	5.04179	7.53138	7.25648	8.03332	8.14613	8.13354	7.70056	8.40009	7.37571	6.75403	6.90178	7.72066	7.80781	8.42352	7.28609	8.05794	7.60853	6.80487	7.66816	7.91104	7.60365	8.27476	8.26098	4.67868	8.12444	8.22946	6.00799	6.38247	6.34401	6.31895	6.90599	5.75768	6.928
E15 Acinar	1418967_a_at	St7	8.2111	8.13629	8.21591	8.17407	8.76311	8.98574	9.14455	9.61448	9.7033	9.48148	8.68449	9.01196	8.84334	8.70125	6.53015	6.82077	7.33243	7.76583	7.40244	7.32448	7.84592	7.42247	6.4266	6.61308	6.28371	6.94159	6.68584	6.60364	6.65828	6.62379	7.51907	6.72045	7.54749	8.06543	8.53318	8.08321	5.53389	6.09557	6.27234	6.62463	6.6813	6.83236	8.12105	8.07741	8.0119	7.5258
E15 Acinar	1432016_a_at	Idh3a	10.4874	10.4983	10.7384	10.586	10.4241	10.5662	10.6041	11.0959	11.1574	11.1651	9.06913	8.95614	8.87058	8.70353	10.1085	10.3034	10.2617	10.0447	10.0961	10.2749	10.2487	9.42963	9.26672	10.1522	10.2189	9.94548	10.6784	10.7469	10.9446	10.9561	10.2169	10.5583	10.1831	10.4621	10.2699	10.1308	8.72616	10.2412	10.6607	10.2244	10.1558	10.1025	9.52077	9.81857	9.73363	10.1559
E15 Acinar	1452158_at	Eprs	11.2897	11.4709	11.792	11.6576	11.4852	11.4593	11.7451	12.2588	12.2006	12.3254	10.492	11.0877	11.0661	11.0507	10.8421	10.7112	10.7251	10.6386	11.0365	10.6066	10.0846	10.9905	11.3087	9.17281	9.46572	10.4985	11.7447	10.9146	11.2779	11.2175	10.5933	10.7878	10.7417	11.4948	11.4251	11.4118	12.0517	11.4727	11.6604	11.6468	11.2271	11.3705	11.285	11.2424	11.0478	10.6208
E15 Acinar	1455879_at	Gcn1l1	8.30401	7.99915	8.05906	8.16658	8.44574	7.96047	8.81615	8.84438	8.93507	9.00069	7.4528	7.33229	7.55099	7.46118	7.89403	7.75431	7.24714	5.52364	5.16002	5.8868	5.88345	6.82028	6.47603	6.78222	6.64858	6.31976	7.57285	8.10938	8.11238	7.7139	7.26873	7.24809	6.93757	7.73058	7.7794	7.663	8.07496	6.29125	6.22938	7.83193	7.49285	7.96195	7.21073	7.1523	7.49737	7.83259
E15 Acinar	1423695_at	Edem2	8.49576	8.40221	8.43388	8.30947	9.95332	10.6597	9.26187	11.7857	11.5854	11.6393	7.98311	8.3803	8.8122	8.75678	8.94417	8.89679	9.01607	8.68142	8.68186	8.62558	8.95617	9.1471	8.60778	9.59213	9.36993	9.33972	10.4116	10.4796	10.6515	10.8688	9.76832	9.76805	9.89536	10.4002	9.91974	10.1198	11.4755	11.1293	11.3026	10.8918	10.7985	10.7486	10.3964	10.887	10.6348	10.601
E15 Acinar	1448181_at	Klf15	8.10297	8.12192	8.06149	8.34456	9.37907	9.96498	8.79626	11.3215	11.1032	11.092	8.76604	9.20706	9.42832	9.23362	6.88974	6.815	7.54141	7.43307	7.18241	7.88389	7.09838	8.43816	9.26614	8.08908	8.09458	8.06387	7.08567	7.18195	7.93207	6.88222	8.49866	7.23547	7.71581	7.71107	7.47184	8.80767	8.52851	7.6866	8.09574	8.01619	8.32859	7.7412	8.36378	8.31041	8.68134	8.06797
E15 Acinar	1433966_x_at	Asns	10.448	10.5508	10.5936	10.574	11.6831	12.2206	10.9339	13.2802	13.1288	13.0805	10.7884	10.7238	11.7769	11.9365	9.92301	9.9485	10.766	10.682	10.7061	10.5247	10.5347	11.8712	12.3083	11.5123	11.1018	11.162	10.8686	10.8434	10.8501	10.6992	10.2441	10.6332	10.4095	11.2791	10.8381	10.5253	9.3828	11.2768	11.6425	11.5983	11.5949	11.6977	12.0785	11.871	12.0298	12.0172
E15 Acinar	1417957_a_at	Tspan1	7.43655	7.39595	7.20585	7.13141	8.85587	9.58817	8.12874	10.7304	10.6266	10.9391	6.62329	6.62492	6.91871	6.89972	8.95587	8.57069	9.51819	7.32731	6.39271	6.73397	7.78476	7.45769	6.35408	6.54185	6.33482	6.66276	8.10475	8.24232	8.0522	7.97756	6.23981	6.87085	7.05209	8.5888	10.1499	6.99525	7.05729	6.40047	6.60107	6.60544	6.62087	6.54372	6.62912	6.51857	6.9508	6.63024
E15 Acinar	1428348_at	Gzf1	9.13722	9.31869	9.4337	9.38003	9.62988	9.71242	9.75344	10.076	10.1908	10.1652	8.1908	8.37209	8.24804	7.9827	9.44343	9.62882	9.37254	8.95674	8.74853	9.03425	9.12327	8.25308	8.29937	8.71099	8.72856	8.34207	9.44029	9.22503	9.04561	9.45306	8.54295	9.07339	9.33354	9.02733	8.98379	9.02906	11.0597	8.90937	9.37445	8.73309	8.49533	8.81611	8.73728	8.9969	8.43469	9.14049
E15 Acinar	1417081_a_at	Syngr2	11.2078	10.9897	11.0177	10.9582	11.8963	12.0432	11.7303	12.3529	12.2289	12.269	11.3959	11.4768	11.2898	11.6069	11.1801	11.058	11.1766	10.9002	10.6188	10.7665	10.7356	10.7084	10.8847	10.723	10.3654	10.3534	11.1158	11.2634	11.1737	11.2193	11.0487	10.8746	10.7483	11.6384	11.5019	11.2898	9.3718	11.2452	11.0328	10.9904	10.9937	11.3117	11.5571	11.2107	11.1384	11.3561
E15 Acinar	1420489_at	Mrps14	11.1789	11.249	11.009	10.9343	11.324	11.4312	11.311	11.6151	11.507	11.5295	9.8437	10.1574	9.9964	10.1594	10.5393	10.6324	10.7465	9.52957	9.28176	8.90612	9.08049	9.36269	9.70122	9.70373	9.67271	9.17711	10.5865	11.1615	11.1685	11.1161	10.6846	10.6494	10.5723	10.3973	10.6203	10.7184	9.86727	10.4946	10.6649	10.0432	10.0478	10.2231	10.1146	10.1921	10.38	10.2606
E15 Acinar	1456731_x_at	Polr3k	9.72164	9.96255	10.2291	9.79485	9.88662	10.1118	10.0988	10.606	10.6417	10.7692	7.71051	8.23502	8.04236	7.9758	9.88051	10.0448	10.079	9.1169	9.20958	9.19132	9.19937	8.7237	8.73565	9.09077	8.83725	8.78893	9.73256	9.65328	9.72901	9.60543	9.78668	9.74083	8.95065	8.62404	8.80348	9.06823	7.16635	7.99564	9.41795	9.09131	8.41384	8.64456	8.7026	8.87685	8.76339	9.10432
E15 Acinar	1416471_at	Cept1	10.3639	10.695	11.0704	11.0654	11.1616	11.0369	10.9804	11.2562	11.219	11.3067	9.87725	10.242	9.94138	9.53835	10.7292	10.6127	10.5071	10.227	10.1312	10.3823	10.1719	9.89584	9.56264	9.18347	9.0889	9.61533	10.4279	10.2657	10.314	10.3679	10.3373	10.2921	10.3958	10.5996	10.7813	10.8405	9.49625	11.0836	10.6595	9.777	9.33896	8.6568	9.2815	9.9558	9.68817	9.58056
E15 Acinar	1423748_at	Pdk1	10.5166	10.9029	10.5339	10.7493	11.6221	11.8731	11.0658	12.1755	11.9791	12.0012	9.52832	9.93673	9.60392	9.36889	9.63786	10.0662	9.99844	10.4372	10.2595	10.6329	10.2136	9.73714	9.86777	10.0992	9.98346	10.3702	10.3637	10.2727	10.3605	10.2356	10.0302	9.87952	11.1652	9.82481	9.79269	10.1824	7.85579	9.32308	9.23717	9.69816	9.96665	9.23053	8.69347	9.53458	9.61976	8.94259
E15 Acinar	1419690_at	2610002M06Rik	8.19863	8.28574	8.48361	8.45296	8.52909	8.65775	8.78239	9.09736	9.04757	9.13891	7.27357	7.56073	7.59717	6.98621	8.33646	8.24372	8.56219	8.54355	8.78714	8.44698	8.42444	7.61915	6.67181	8.05337	7.81181	8.37142	8.63229	8.61279	8.75587	8.70193	8.22861	8.47106	8.54654	8.05329	8.37627	8.38058	8.40939	7.94787	8.34488	7.43355	7.2119	7.41748	7.09621	7.3306	7.36072	7.10463
E15 Acinar	1419458_at	Rgnef	8.80177	8.77865	8.70621	8.95057	8.34161	8.16797	9.12369	9.82319	9.64314	9.8157	7.30815	8.1682	8.43281	7.86416	7.97052	7.60964	7.99178	7.58595	7.85658	7.5692	8.30761	8.24581	8.51074	8.06902	7.74221	8.28664	7.9789	6.72246	6.43966	7.33674	5.59111	6.19092	5.54974	8.48462	8.6086	8.52852	6.71814	7.40876	7.86989	8.20886	9.19784	9.30643	8.31433	8.59812	8.22779	7.97519
E15 Acinar	1420472_at	Mtpn	8.78838	8.92385	8.90556	8.84133	8.65008	8.72718	8.60122	9.37824	9.50448	9.53994	7.89303	7.86198	7.55801	7.56868	8.49421	8.22272	8.71199	7.4914	7.10808	7.08084	6.83447	7.07447	7.45499	7.3707	7.17485	7.22943	8.47345	8.00099	8.6797	7.98759	8.35361	8.2579	8.3745	7.38801	7.71337	7.91686	7.9461	8.54364	8.7785	7.38093	7.43316	7.14389	8.0367	7.5231	7.54271	7.57569
E15 Acinar	1451259_at	Rexo2	11.0195	10.8985	10.8572	10.8977	10.9132	11.4209	10.7239	12.2243	12.3224	12.2015	10.8789	10.8783	10.8852	10.9476	10.1208	10.0987	10.3552	11.095	10.9206	10.8143	10.4799	12.0832	12.4614	11.5555	11.4736	11.3331	10.5129	10.9124	10.9624	10.8712	11.8427	10.8084	10.9374	11.1046	11.0864	11.0858	12.14	11.1329	11.3207	11.3647	11.1551	11.5264	11.6365	11.5026	11.8009	11.7698
E15 Acinar	1447868_x_at	Glrx3	10.1455	10.6803	10.8963	10.4508	10.6448	10.9378	10.8163	11.2474	11.21	11.1413	9.36889	10.0379	9.50823	9.92389	10.9389	11.0786	10.8938	10.14	10.481	10.1477	9.92181	11.2288	11.2065	9.95049	9.55955	9.97751	10.6181	9.9827	10.2991	10.0689	9.41998	10.065	9.70667	10.3019	10.0129	10.1486	10.7821	9.22038	9.733	9.60919	8.99174	9.47689	9.36213	9.09709	9.0829	9.29619
E15 Acinar	1456036_x_at	Gsto1	10.9819	11.0004	11.081	10.8402	10.6432	11.2279	10.7974	11.6065	11.7633	11.6311	9.51349	9.42218	9.51008	9.3967	9.21153	9.45346	9.71264	10.501	10.3443	10.275	10.259	10.2896	10.1801	9.52356	9.18317	8.94763	10.3079	10.044	9.80958	10.0148	9.47	10.0604	9.37547	10.698	10.2654	9.80893	9.66042	10.2817	10.4735	10.5715	10.8109	10.4224	10.6383	10.0585	10.3685	10.4398
E15 Acinar	1417699_at	Gtf2f1	9.5076	9.50896	9.44473	9.69996	9.54313	9.58598	9.71188	9.83151	9.85715	9.92028	9.26855	9.53727	9.45879	9.5508	9.00272	8.9668	9.25238	8.02935	7.98414	8.12922	7.7884	8.64613	7.61817	8.38014	8.11193	7.85687	9.24394	9.05762	8.94029	9.34644	8.49482	8.7467	8.51219	8.85491	8.98068	8.95845	9.58365	8.80554	8.86933	8.71263	8.96515	8.47684	8.51913	8.99067	8.67263	8.06784
E15 Acinar	1440715_s_at	Cdkn2aipnl	10.3629	10.6204	10.0094	10.1205	10.4517	10.5325	10.1823	10.5238	10.5399	10.4633	9.09527	8.98292	8.80527	8.74915	9.62611	9.90871	10.3052	10.3644	9.70706	9.77593	10.4191	8.59209	9.88305	9.45499	9.36368	9.82673	9.4361	9.49695	9.43403	9.25029	8.63665	9.34664	9.24493	8.84056	9.30289	8.90458	8.01192	9.16451	9.29428	8.67303	8.97475	8.82558	9.12688	9.24723	8.93689	8.53375
E15 Acinar	1425627_x_at	Gstm1	7.90656	7.89731	7.67151	7.6843	9.04857	10.2659	8.93063	11.1712	11.0821	10.9156	9.25053	9.52957	9.27081	9.32051	7.11414	7.27877	8.082	7.50689	7.87445	7.76076	7.51098	8.15052	8.63752	7.45868	7.55259	7.61574	7.66639	7.20968	7.50077	7.183	8.15445	7.09486	7.37237	8.04047	8.40654	8.45506	9.16374	7.91457	7.61729	8.76028	8.49029	8.14438	8.51827	8.02744	8.13666	8.24871
E15 Acinar	1448388_a_at	1110002B05Rik	11.0466	11.326	11.4971	11.5006	12.1599	12.0735	12.6274	12.6362	12.6406	12.7772	11.2673	11.3089	11.3022	11.0993	10.9069	10.8739	10.7703	11.34	11.4249	11.6162	11.3037	10.3382	9.77303	10.3982	10.545	10.748	12.0136	11.458	11.7382	11.548	11.478	11.6661	11.5821	11.9302	12.2679	12.3536	12.2487	12.0435	12.0735	10.8887	10.4034	10.4442	10.5263	10.8686	10.5769	10.7463
E15 Acinar	1437209_at	Cep76	9.2246	9.45387	9.02727	9.23996	9.85355	9.92073	9.49029	10.8831	10.7264	10.7982	8.8124	8.28386	8.32095	8.28178	9.76276	9.71522	9.9239	9.4664	9.65409	9.83165	9.70852	8.41913	8.42705	9.39006	8.9711	8.44619	9.30222	9.3154	9.73134	9.42013	8.87446	8.97069	8.73567	8.95447	8.7865	8.96694	9.27486	9.33351	9.78693	9.40824	9.24955	9.39147	8.99945	9.48957	9.29392	9.27365
E15 Acinar	1418248_at	Gla	9.09348	9.29321	9.21822	9.27547	8.94724	9.22851	8.78177	10.2104	10.4109	10.2694	10.1345	9.61171	9.24282	9.93627	7.84308	7.99692	8.54472	7.66294	8.19324	7.8927	7.40925	8.25113	8.42405	8.83057	8.25773	8.2944	8.1495	7.99394	7.92594	8.20319	7.40655	8.19925	7.80501	8.20156	7.71433	7.93677	8.41679	8.25114	8.24817	7.79538	7.49988	7.73026	8.69737	8.33046	7.83276	8.485
E15 Acinar	1419183_at	Papd4	9.7392	9.98663	10.0599	10.325	9.92311	9.78754	10.2485	10.2866	10.3435	10.4096	9.49874	9.07356	9.02945	8.56409	9.31884	9.29222	9.49268	9.13593	9.23384	9.25259	8.94095	8.14784	8.09302	8.97397	9.1138	8.84081	9.37914	9.22132	9.40229	9.24685	9.84728	9.45092	9.78494	9.61026	9.9089	9.8684	8.91553	10.0692	9.43977	8.66018	8.18779	8.44958	8.30715	8.17787	8.30425	8.65581
E15 Acinar	1448660_at	Arhgdig	8.08924	8.40217	8.04813	7.826	10.3904	11.245	9.53658	12.6529	12.3737	12.3423	7.85378	8.67554	9.77568	9.67653	7.72011	7.92993	9.46854	9.0785	8.62102	8.81399	8.89203	7.58873	8.26914	6.46301	6.83162	6.57242	8.45518	8.22188	8.81337	8.57826	9.48793	8.78045	8.54412	10.3217	9.99434	8.97332	9.47751	7.78071	8.83378	8.57576	8.51113	9.27993	8.76237	8.28554	8.56315	8.8386
E15 Acinar	1428507_at	Hdhd2	10.1076	10.1164	10.2069	10.1607	9.89783	9.93845	10.1847	10.534	10.6822	10.589	8.3596	8.5107	8.62544	8.33814	9.67253	9.5866	9.95453	9.14272	9.06181	9.0919	9.05884	10.1016	8.55531	9.43094	8.99625	8.55545	10.1935	10.007	9.92189	9.80259	9.75528	9.62791	9.96954	9.23983	9.72413	9.68269	9.48397	9.11249	9.31267	8.57747	8.22788	8.6119	8.72607	8.60597	8.16742	8.47214
E15 Acinar	1454648_s_at	D10Wsu102e	11.9509	12.0066	11.8396	11.8796	11.8429	11.8662	11.3542	12.0445	12.091	11.9784	11.8171	11.5211	11.6272	11.7146	10.863	11.0713	11.1864	11.1718	11.2566	11.3982	11.2459	10.1646	10.2436	10.9389	11.0633	11.2392	10.5626	10.8813	10.6574	10.4662	10.5335	10.3879	10.2104	10.5994	10.6393	10.3624	9.09051	10.8787	10.6042	10.6999	10.7839	10.6365	10.8702	10.8573	10.7083	10.5435
E15 Acinar	1423780_at	Hibadh	9.3723	9.13391	9.64753	9.63067	9.49414	9.63483	9.7416	10.4889	10.3921	10.363	8.42432	9.03886	9.05266	8.68277	8.89152	9.0428	9.04298	8.84747	8.827	8.70148	8.3763	8.98798	8.93688	8.94767	9.34185	9.11714	9.47795	9.06808	9.24188	9.46696	9.04708	8.86615	9.01607	9.09434	9.136	9.15685	7.96471	9.60534	9.72287	9.08309	8.82877	8.89059	8.87534	9.08286	8.58981	8.59457
E15 Acinar	1417024_at	Hars	10.653	10.8412	10.9629	10.9958	10.968	10.9891	11.0283	11.4897	11.6926	11.6281	9.00553	9.11207	9.33625	9.15733	10.3246	10.2613	10.7484	9.25544	9.372	9.28706	9.13186	8.38395	7.87345	7.6425	7.63533	8.0313	10.7519	10.7391	10.6849	10.6134	10.19	10.3324	10.2957	10.6477	10.7309	10.6235	10.2981	10.2124	10.1018	9.53887	9.19825	9.27986	9.2637	9.3161	9.21533	9.14427
E15 Acinar	1423647_a_at	Zdhhc3	8.35463	8.30202	8.26518	8.26244	8.3237	8.45881	8.54995	9.11771	9.11956	9.22786	6.46318	6.43914	6.38751	6.37481	8.53196	8.13553	8.25181	7.17444	6.97679	6.05629	7.24869	5.54014	6.70331	6.62	6.99753	6.18443	8.45917	8.85693	8.7482	8.48456	7.43222	7.69712	8.00644	8.27106	8.30287	8.20925	9.43089	8.03906	8.55784	7.79234	8.10003	8.07126	7.45516	7.58221	7.61387	7.69208
E15 Acinar	AFFX-TransRecMur/X57349_3_at	Tfrc	8.82429	8.94511	8.83262	8.58748	9.54893	9.9135	9.28066	10.4328	10.4017	10.2234	9.57115	9.16706	9.09111	9.15728	7.33026	7.87392	8.23949	8.4582	8.71094	8.72136	8.28808	8.58505	8.99858	8.30863	8.40775	8.19793	7.3519	7.34936	7.42649	7.29455	7.4355	7.93631	7.56091	7.26606	7.37356	7.71839	9.0319	7.92501	8.41349	7.93087	7.95191	8.34128	7.68626	7.70646	8.54904	7.89529
E15 Acinar	1427152_at	Qser1	9.07926	8.85676	8.8048	9.07398	8.91742	9.01767	8.87974	9.30315	9.29858	9.40876	8.57001	9.02586	8.25053	8.19914	8.85433	8.67533	8.7678	7.95757	7.8388	8.21432	8.24751	8.85741	8.96964	8.30239	8.39073	8.96873	8.07676	8.20298	8.0691	7.54551	8.05357	8.24625	7.9662	7.46879	7.55117	7.64701	6.01478	7.56005	8.3216	7.91413	7.64719	8.3596	7.92575	7.68977	8.13489	7.65857
E15 Acinar	1450911_at	Ppib	13.5581	13.4758	13.3924	13.4428	13.6778	13.7449	13.5562	14.0389	13.9526	14.0121	12.5638	12.7341	12.8649	12.9184	13.5702	13.5632	13.726	12.3556	11.7691	11.8653	11.9593	11.4403	11.566	11.8231	11.6332	11.632	13.2268	13.3548	13.5196	13.4253	13.4628	13.2894	13.432	13.4215	13.5533	13.5886	12.8551	13.0724	13.0776	12.6447	12.5511	12.4916	12.3422	12.496	12.5494	12.3731
E15 Acinar	1451366_at	Cops6	12.2113	12.0497	12.3138	12.2929	11.8612	11.8967	11.8945	12.3039	12.4264	12.3263	10.5651	10.887	10.8802	10.9738	11.5074	11.5056	11.7347	10.9104	10.7882	10.5892	10.2311	10.8218	10.6043	10.8387	10.5651	10.3867	12.0316	11.7806	11.8259	11.8984	11.5804	11.7803	11.867	11.5049	11.4136	11.2527	11.3645	11.0098	11.1059	10.6363	10.7251	11.3277	10.9326	10.704	10.7809	10.7769
E15 Acinar	1422445_at	Itga6	11.6711	11.95	11.9061	11.9602	12.6605	12.8987	12.0581	13.2747	13.1002	13.2348	12.206	12.3097	12.1806	12.056	11.7451	11.9907	11.8662	12.2332	11.8495	12.1808	12.1899	9.32723	8.63166	9.28514	9.79489	9.78617	11.587	11.9356	11.872	11.7097	12.1351	11.678	11.6822	12.1505	12.3656	12.1138	9.66969	12.0044	11.675	11.8289	11.5621	11.4256	10.9153	11.6333	11.6075	11.5202
E15 Acinar	1424541_at	Tmem70	9.59331	9.86476	9.87032	9.71548	9.73857	9.93231	9.70654	10.2408	10.3739	10.3124	8.73691	8.89645	8.99051	8.9535	9.49423	9.63824	9.99483	9.08234	9.17653	9.01484	8.90177	8.56436	9.24344	8.92015	8.72286	8.43899	9.31247	9.3914	9.62053	9.55462	8.96755	9.10886	9.36564	9.02289	8.9431	9.09981	8.10365	9.16261	9.55858	8.50188	8.81665	8.98711	8.95229	9.05773	8.70761	9.27292
E15 Acinar	1416235_at	Lrrc59	9.3584	9.48947	9.3132	9.57066	9.90204	10.3603	9.51805	10.6927	10.8908	10.8923	9.18652	9.07437	9.2499	9.4376	8.68936	8.55716	8.70288	9.15965	8.57883	9.11688	9.35567	8.55276	8.78229	7.81004	7.64761	7.58242	9.10887	9.05851	9.12756	9.23258	8.77651	8.69816	8.59428	8.6289	8.81284	8.77365	5.91041	8.50046	9.1166	9.01921	8.75005	8.78034	8.15688	8.29673	8.37599	8.14538
E15 Acinar	1417346_at	Pycard	7.93929	7.51067	7.3531	7.63325	9.69971	9.89213	9.47573	10.1815	10.2138	10.2588	9.18681	9.46376	9.28068	9.03922	8.62521	8.64836	8.83046	8.91092	8.62904	8.46904	8.58632	9.04834	8.12278	8.47475	8.22505	8.53499	9.52511	9.61359	9.54244	9.69893	9.92102	9.24478	9.45016	10.0941	10.2125	10.3769	10.0569	10.1844	8.98498	8.80141	8.67684	9.06014	9.59482	9.02849	9.30376	9.31265
E15 Acinar	1438480_a_at	Thyn1	11.8407	11.8717	12.1734	12.1393	12.0131	11.9237	11.907	12.3694	12.373	12.2793	9.64106	10.117	10.0367	10.1775	11.0787	11.0412	11.313	11.0046	11.1394	11.0617	10.6221	11.13	10.8205	10.7581	10.7885	11.039	11.851	11.8932	12.0899	11.9784	11.5426	11.7374	11.7793	11.6351	11.5164	11.6805	11.8503	11.7238	11.9535	11.6427	11.4829	11.2084	10.987	11.3354	11.0648	10.9908
E15 Acinar	1429690_at	1300003B13Rik	9.4789	9.49385	9.43467	9.44002	9.45207	9.70364	9.90024	9.89386	10.0306	9.98912	8.22883	8.78468	8.56572	8.11326	8.83598	9.06307	9.48307	8.86393	8.74812	9.05505	9.06136	8.8468	10.0391	9.19019	8.93748	8.6429	8.85237	8.75875	8.89869	8.80858	8.34097	8.27518	8.26509	8.82976	8.59265	8.50031	5.66361	8.44183	9.02425	8.53618	8.54408	8.64258	8.37219	8.58399	8.14392	8.68361
E15 Acinar	1427944_at	Caprin2	8.01819	8.18565	8.42911	8.53716	7.98924	8.02306	8.20316	8.76911	8.6579	8.60312	7.46862	7.37905	7.36035	7.29447	7.19841	7.05748	7.34496	7.25002	7.42537	7.25886	6.84308	6.52936	7.56502	5.82076	6.7451	6.77457	8.15453	7.46418	7.89382	7.76329	8.10499	7.63122	8.07361	6.83555	7.17559	7.50755	8.3352	6.94613	7.17192	6.49792	6.68449	6.48977	6.42939	6.86226	7.03667	6.55087
E15 Acinar	1449615_s_at	Hdlbp	11.0159	10.5801	10.9459	11.038	11.4155	11.4559	11.3564	12.0644	12.1241	12.1935	10.8629	10.8505	10.9401	10.8247	11.0121	10.8036	10.5813	9.81236	9.53866	9.20541	9.24054	9.74161	10.2488	10.0903	10.1425	10.2156	11.3334	11.3842	11.6396	11.4012	11.1676	10.8984	10.7638	11.673	11.4754	11.6541	11.6437	11.1863	11.2954	11.9456	11.7758	11.9821	11.5427	11.5353	11.5773	11.5637
E15 Acinar	1441682_s_at	Xpot	11.5415	11.6603	11.7198	11.5164	10.8173	10.9783	11.0254	11.8199	11.9069	11.9397	10.3796	9.94042	10.3722	10.1802	10.6682	10.894	11.0571	10.9825	11.1114	11.045	11.0871	10.8991	11.301	11.0107	11.0164	11.0007	10.7694	10.7108	10.7337	10.9829	11.8273	10.4029	10.2449	11.0765	10.783	10.5274	11.0003	10.0649	10.5027	10.6987	10.7747	11.171	11.0063	10.8304	10.9618	10.9155
E15 Acinar	1437711_x_at	Odc1	12.3249	12.4466	12.5458	12.3557	12.4651	12.526	12.5242	13.0269	12.9977	12.9405	12.8516	12.6061	12.4838	12.5411	12.079	12.1308	12.0697	11.7355	12.0318	11.9245	11.6483	11.8378	11.7684	12.4739	12.5152	12.7502	11.8215	11.555	11.6668	11.5626	11.5477	11.5467	11.3116	12.2246	11.8567	11.8766	8.73409	11.0481	11.4291	12.25	11.9966	11.9956	11.9922	11.7117	11.9728	12.0869
E15 Acinar	1435232_x_at	Mrpl15	11.3973	11.3371	11.3261	11.3306	11.0579	11.1668	10.9245	11.8226	11.8936	11.719	9.18785	9.61968	9.53476	9.75289	10.5309	10.5655	10.9729	10.2376	10.1608	9.67608	9.66355	10.4572	10.7125	10.3884	10.0431	10.0047	10.3767	10.4229	10.405	10.49	10.4421	10.2998	10.3803	10.4441	10.462	10.4262	8.81554	10.1797	10.4957	9.8802	10.2371	10.406	10.2203	10.2451	10.2237	10.087
E15 Acinar	1423767_at	Dpy30	11.1592	11.2277	11.3483	11.3054	11.1996	11.1401	11.4516	11.8052	11.8325	11.8401	9.04089	9.03608	8.63783	8.68031	10.9347	10.9055	11.1018	9.97467	10.2646	10.2308	9.91476	9.47387	9.27334	9.65819	9.47349	9.35093	11.6083	11.5581	11.6021	11.4908	10.6792	11.3269	11.3696	11.25	11.2043	11.159	9.52334	10.906	11.1498	9.59551	9.36524	9.84598	9.18587	9.23787	9.04493	9.37224
E15 Acinar	1426381_at	Pprc1	11.4108	11.4154	11.3371	11.4417	11.2054	11.323	11.1442	11.7972	11.9048	11.7259	11.1917	10.7904	11.2621	11.2404	9.47393	9.5704	9.98443	9.9417	10.024	9.93708	9.70529	10.1209	10.2066	9.94886	9.8819	10.346	10.3139	10.3206	10.2845	10.4307	10.8697	10.1938	10.498	10.8596	10.9611	10.6737	8.69587	9.80974	9.73469	10.0453	10.2152	10.0254	10.3179	10.1436	9.94806	10.0897
E15 Acinar	1438001_x_at	Reep5	11.3991	11.423	10.9979	11.3285	12.8151	13.1417	12.3309	13.6851	13.5901	13.4826	10.9861	11.1863	11.7115	11.8831	11.0375	11.2496	12.3351	10.7186	10.776	10.6277	10.8864	11.6115	11.922	11.2196	10.9293	10.8409	11.6775	11.5807	11.8863	11.6067	11.7998	11.5137	11.9187	12.2654	12.2208	12.0903	12.2663	12.1597	12.3217	11.5068	11.4747	12.0165	11.9618	11.8995	11.937	11.7048
E15 Acinar	1450630_at	Qtrt1	9.47793	9.58179	9.81212	10.0959	9.9767	10.1223	9.5967	10.6702	10.8269	10.6176	8.14247	7.79053	8.37332	8.20657	9.77827	9.62454	9.6831	7.80049	7.88318	7.94123	7.7546	8.4188	8.60405	8.24523	7.97615	7.9903	9.82188	9.72988	9.94124	9.86996	9.34907	9.74963	9.73057	9.63438	9.62623	9.61039	8.86115	9.40626	9.38106	9.33545	9.29741	8.94405	8.08691	8.88409	8.10551	8.08901
E15 Acinar	1423211_at	Nop10	12.0128	11.9955	12.0186	11.9822	11.8391	12.0343	11.8152	12.6862	12.6602	12.5193	10.4595	10.6326	10.1837	10.3207	10.6574	10.9148	11.2255	10.5462	10.7054	10.1016	10.244	10.4998	10.1735	10.8086	10.9932	10.7725	11.0878	11.3402	11.6424	11.4066	11.1053	11.2376	11.626	11.0062	11.2581	11.5617	10.7663	10.9474	11.2247	10.9591	10.8695	10.9322	10.9406	11.119	11.0603	11.2375
E15 Acinar	1436752_at	Tbccd1	8.64172	8.82853	9.12051	8.96899	9.09484	9.24545	9.00996	10.3425	10.4036	10.5891	7.17399	7.45623	7.54554	7.09785	8.23745	7.94607	8.48438	7.88711	7.59682	7.78947	7.28884	7.38568	6.32637	7.61718	8.02531	7.34893	9.11849	9.25349	9.35791	9.24475	8.44015	9.05236	8.78987	8.58082	8.55715	8.6584	9.37062	8.71703	9.46931	8.09313	7.89286	7.6345	7.79105	7.85378	7.60721	7.36204
E15 Acinar	1417774_at	Nans	10.1659	10.1922	9.82042	9.75391	10.5422	10.8442	10.0832	10.9768	10.8181	10.93	8.4065	8.64386	8.572	9.09274	9.58709	9.61299	9.8447	9.61915	9.8982	9.52954	10.0795	8.87179	8.73252	8.97128	9.25127	8.23612	10.4088	10.6344	10.6381	10.5479	10.2838	10.027	9.98983	9.74383	9.85706	9.97064	9.36606	9.18598	9.63078	9.95637	9.54798	10.4591	9.38588	9.35886	9.07356	9.54175
E15 Acinar	1424372_at	Mrpl32	11.9626	11.9837	12.084	12.0511	11.9453	11.8332	12.1915	12.3654	12.2625	12.3318	10.2034	10.3512	10.4835	10.3253	11.926	11.9232	12.2495	10.9122	11.1632	11.0543	10.949	10.2157	10.5242	10.5134	10.5187	10.4977	12.0231	11.9646	12.0082	11.9872	11.6956	11.7496	11.7733	11.4285	11.7281	11.7053	10.7376	11.5929	11.6678	10.5945	10.7033	10.8324	10.3075	10.5737	10.4264	10.4752
E15 Acinar	1416386_a_at	M6pr	8.19076	8.28932	8.34343	8.43854	8.36604	8.39423	8.66816	8.86775	8.81477	8.95077	8.10272	8.07221	7.96201	7.72663	7.69303	7.80967	8.01379	7.58451	7.20522	7.11796	6.86826	8.00552	7.72465	8.0881	7.6557	7.70633	8.31903	7.70256	8.20769	8.24607	7.71354	7.92556	7.59536	7.2112	7.52318	7.54029	6.89074	8.71392	8.779	7.44178	7.05866	7.28138	7.64452	7.69864	7.36039	7.88345
E15 Acinar	1452012_a_at	Exosc1	11.0508	11.0327	11.091	11.0828	10.771	10.7237	10.779	11.2865	11.4001	11.2778	8.94826	8.60685	8.98436	8.6195	10.5225	10.4872	10.5112	9.52197	9.88563	10.0709	9.56533	9.70171	9.80208	9.76166	9.57311	9.63994	10.4815	10.7827	10.5829	10.6171	10.6979	10.4566	10.3411	10.7437	10.7155	10.3378	11.2288	10.6076	10.6857	10.1976	10.3415	10.202	10.1392	10.1602	10.1934	9.93723
E15 Acinar	1418198_a_at	Tm9sf1	9.56588	10.0299	10.198	10.0468	10.8366	10.7286	11.3608	11.66	11.4916	11.5934	9.52989	9.75712	9.8011	9.41106	10.4487	10.3088	10.4684	10.4347	10.3831	10.5534	10.2304	10.1324	8.74206	9.49487	10.155	9.76645	11.2662	10.7507	11.0872	11.0353	10.2475	10.7163	10.6741	11.0414	11.2884	11.2017	9.94846	10.7453	11.1967	10.1333	9.77698	9.969	9.77813	10.1077	10.0456	10.0305
E15 Acinar	1438786_a_at	2610021A01Rik	8.57743	8.67507	8.84226	8.75453	8.67863	8.86153	9.03484	9.70897	9.7121	9.56478	7.93914	8.28217	7.7906	7.87869	8.37873	8.57066	8.80845	7.89851	8.09625	7.96849	7.86069	8.79481	8.26643	8.9106	8.66719	8.62771	8.5321	7.96149	7.78088	7.99739	7.45128	8.0421	7.26016	8.3204	8.38467	8.35846	8.77275	7.38602	8.30772	7.7521	7.48791	7.68944	7.5399	7.56616	7.64363	8.34316
E15 Acinar	1416696_at	D17Wsu104e	10.8639	10.7584	10.657	10.7166	10.881	11.1114	10.6701	11.6283	11.6474	11.6018	9.66385	10.0408	9.86276	10.0045	10.4701	10.4144	10.5722	8.99025	8.82858	8.65278	9.11265	9.6711	9.22197	10.3183	10.2537	9.99712	10.8424	11.0862	11.0722	11.31	10.9203	11.1035	11.0804	10.6163	10.6508	10.8633	11.5758	11.1447	11.5601	11.1874	11.1346	11.2029	10.9474	11.0453	11.0556	11.1491
E15 Acinar	1451100_a_at	Cdv3	7.70603	7.22006	7.2446	7.45374	7.59026	7.99304	7.21282	7.73693	7.73375	7.6489	7.67739	7.58765	7.43036	7.06673	6.6217	6.49085	6.63394	5.52967	6.10179	6.43701	5.60923	5.35181	6.26504	5.14016	5.31739	4.90412	6.50938	7.15651	6.72271	6.61192	6.04628	5.95764	6.11054	6.82211	7.0791	7.23345	7.75155	6.09816	6.22945	6.37726	6.68239	6.28267	6.04709	6.21216	6.19014	5.9309
E15 Acinar	1417581_at	Dhodh	8.77615	8.61927	8.77636	8.61909	8.43282	8.76962	8.80682	9.64407	9.52258	9.501	8.16036	8.1255	8.17995	7.9563	7.62928	7.49001	8.28813	8.0132	7.56459	7.2836	7.43645	8.17797	9.50649	8.29621	7.9816	7.51715	8.06667	8.18565	8.0132	7.89681	8.27379	8.55926	8.80427	8.11505	8.13117	7.96989	8.3706	7.59899	8.29507	8.19206	8.43297	8.20133	8.50593	7.98886	8.24866	8.26964
E15 Acinar	1451511_at	Hibch	8.27439	8.44128	8.75227	8.7182	9.00787	9.1213	9.02348	9.86981	9.81897	10.0233	7.2084	7.77611	7.40047	7.04797	8.89535	8.75764	8.76601	8.13823	8.32302	8.06482	8.51489	7.60832	7.63063	7.79051	7.41898	8.70748	9.0175	8.45108	8.68351	8.70082	7.94782	8.35573	8.1257	8.02272	8.41249	8.31708	9.37081	8.84125	9.22281	8.04729	7.22734	7.10387	6.96057	7.57989	7.39322	8.04996
E15 Acinar	1422768_at	Syncrip	9.73391	9.5612	9.5597	9.69789	9.81194	9.99721	9.70317	10.1009	10.2337	10.1552	9.59576	9.35889	9.70635	9.50026	9.61394	9.6992	9.232	9.22828	9.51292	9.54727	9.13835	8.19021	7.32923	7.43757	8.46939	7.6977	9.34296	9.41548	9.2	8.98133	8.7002	9.41846	8.75674	8.82908	9.11491	8.84148	6.67459	7.69729	7.06386	7.64551	7.45773	7.81106	7.01186	7.19095	7.49413	7.39679
E15 Acinar	1436750_a_at	Oxct1	9.28865	8.96079	9.24922	9.10399	9.49123	9.63705	9.39334	10.6724	10.6393	10.732	9.48346	10.0617	10.1368	10.0245	8.29159	8.23721	8.2584	8.92085	8.53953	8.52365	8.76688	8.35184	9.18454	10.3365	10.0773	10.0684	9.81119	9.51072	9.58635	9.503	9.6044	9.49622	9.31339	9.92545	9.86497	10.4341	10.536	10.1827	10.5441	10.4927	10.0724	10.4678	10.4256	10.2732	10.573	11.0275
E15 Acinar	1422797_at	Robld3	10.3277	10.1946	10.1216	10.3537	10.6723	10.8403	10.653	11.3674	11.2412	11.2574	9.64067	9.75237	9.71825	9.90554	9.7346	9.7119	10.07	9.54648	9.70075	9.5691	9.78821	10.5267	10.0163	9.76899	9.7577	9.71853	10.5818	10.6294	11.0781	10.7647	10.2633	10.7452	10.7596	10.0917	10.1961	10.5152	11.0579	10.3855	10.5928	9.91319	10.3831	10.3161	10.3417	10.2418	10.2933	10.3278
E15 Acinar	1416393_at	Emg1	12.5415	12.5789	12.7061	12.7311	12.6806	12.5649	12.5262	12.9172	12.928	12.7824	11.1746	11.3805	11.347	11.2775	11.891	11.7845	11.965	11.4064	11.4597	11.4544	10.9047	11.4087	11.1929	11.4904	11.3286	11.342	11.8133	11.7672	11.7863	11.8238	11.9067	11.9426	12.0849	11.9027	12.0091	11.8584	10.7436	11.9355	11.8191	11.3244	11.1796	11.1297	11.0121	11.1951	11.0167	11.0607
E15 Acinar	1417205_at	Kdelr2	9.1885	9.37514	9.24198	9.22831	9.78591	10.1856	9.83746	10.8534	10.7334	10.9039	8.84405	8.88604	8.72616	8.63141	8.79568	8.80173	9.15539	9.30246	9.29433	9.17292	9.28725	9.16539	8.2621	9.05138	8.89569	8.6678	9.8292	9.75573	9.85041	9.89317	10.0187	10.044	9.81951	9.89528	10.0852	10.089	8.4294	9.90199	10.0205	9.48379	9.23833	9.59017	9.13598	9.46318	9.17185	9.43344
E15 Acinar	1428151_x_at	Ccbl1	8.54867	8.65648	8.5135	8.55726	8.68178	8.89271	8.84026	9.6002	9.62814	9.49047	8.81766	9.70108	9.26296	9.29082	8.56092	8.52948	8.87737	7.69058	7.619	7.45429	8.03331	8.37088	8.7282	8.53976	8.68551	8.1831	8.10455	8.31395	8.12031	8.3033	8.40411	8.24372	7.8971	8.17181	7.78286	8.0168	9.11085	8.06304	8.51331	8.56276	8.59353	8.77282	8.83114	9.01251	8.68862	9.16085
[truncated: 3,383 more rows]

## Sheet: Gene Signature (repressed)
Cell Type	AffyID	Gene Symbol	E11 SPP-1.CEL	E11 SPP-2.CEL	E11 SPP-3.CEL	E11 SPP-4.CEL	E15 SPP-1.CEL	E15 SPP-2.CEL	E15 SPP-3.CEL	E15 Acinar-1.CEL	E15 Acinar-2.CEL	E15 Acinar-3.CEL	Adult Duct-1.CEL	Adult Duct-2.CEL	Adult Duct-3.CEL	Adult Duct-4.CEL	E15 EP-1.CEL	E15 EP-2.CEL	E15 EP-3.CEL	P1 Alpha-1.CEL	P1 Alpha-2.CEL	P1 Alpha-3.CEL	P1 Alpha-4.CEL	Adult Alpha-1.CEL	Adult Alpha-2.CEL	Adult Alpha-3.CEL	Adult Alpha-4.CEL	Adult Alpha-5.CEL	E15 Beta-1.CEL	E15 Beta-2.CEL	E15 Beta-3.CEL	E15 Beta-4.CEL	E17 Beta-1.CEL	E17 Beta-2.CEL	E17 Beta-3.CEL	P1 Beta-1.CEL	P1 Beta-2.CEL	P1 Beta-3.CEL	P15 Beta-1.CEL	P15 Beta-2.CEL	P15 Beta-3.CEL	P15 Beta-4.CEL	P15 Beta-5.CEL	P15 Beta-6.CEL	Adult Beta-1.CEL	Adult Beta-2.CEL	Adult Beta-3.CEL	Adult Beta-4.CEL
[truncated: 4,228 more rows]
